# Supplementary material for: Phenotypic and RNA-seq profiles identified key pathways and genes involved in gleditsioside biosynthesis in Gleditsia sinensis Lam
Source: Research Square preprint supplement (doi:10.21203/rs.3.rs-3021898/v1), 2023-06-16
Supplement: Supplementary file 1 [file 1c2a1f90168ff9e8f2229ac9.docx]

**Supplemnet Table 3** Enzymes during gleditsioside biosynthesis in *Gleditsia sinensis* pods

| **Gene Name** | **Enzyme Full Name** | **Gene Number** | **KEGG Entry** |
| --- | --- | --- | --- |
| ACAT | acetyl-CoA C-acetyltransferase | 17 | [EC:2.3.1.9] |
| HMGCS | 3-hydroxy-3-methylglutaryl coenzyme A synthase | 21 | [EC:2.3.3.10] |
| HMGCR | hydroxymethylglutaryl-CoA reductase (NADPH) | 16 | [EC:1.1.1.34] |
| MVK | mevalonate kinase | 22 | [EC:2.7.1.36] |
| PMVK | phosphomevalonate kinase | 29 | [EC:2.7.4.2] |
| MVD | diphosphomevalonate decarboxylase | 7 | [EC:4.1.1.33] |
| DXPS | 1-deoxy-D-xylulose-5-phosphate synthase | 46 | [EC:2.2.1.7] |
| DXR | 1-deoxy-D-xylulose-5-phosphate reductoisomerase | 3 | [EC:1.1.1.267] |
| ISPD | 2-C-methyl-D-erythritol 4-phosphate cytidylyltransferase | 5 | [EC:2.7.7.60] |
| ISPE | 4-diphosphocytidyl-2-C-methyl-D-erythritol kinase | 3 | [EC:2.7.1.148] |
| ISPF | 2-C-methyl-D-erythritol 2,4-cyclodiphosphate synthase | 6 | [EC:4.6.1.12] |
| ISPG | (E)-4-hydroxy-3-methylbut-2-enyl-diphosphate synthase | 7 | [EC:1.17.7.1] |
| HDR | 4-hydroxy-3-methylbut-2-en-1-yl diphosphate reductase | 16 | [EC:1.17.7.4] |
| IDI | isopentenyl-diphosphate Delta-isomerase | 10 | [EC:5.3.3.2] |
| GPS | geranyl diphosphate synthase | 12 | [EC:2.5.1.1] |
| FDPS | farnesyl diphosphate synthase | 20 | [EC:2.5.1.10] |
| FDFT1 | farnesyl-diphosphate farnesyltransferase | 12 | [EC:2.5.1.21] |
| SQLE | squalene monooxygenase | 56 | [EC:1.14.14.17] |
| LUP4 | lupeol synthase 4 | 42 | [EC:5.4.99.39] |
| CYP93E1 | beta-amyrin 24-hydroxylase | 22 | [EC:1.14.99.43] |
| LUP2 | lupeol synthase 2 | 10 | [EC:5.4.99.40] |
| LUP1 | lupeol synthase 1 | 1 | [EC:5.4.99.41] |
| CAMS1 | camelliol C synthase | 26 | [EC:5.4.99.38] |
