# Supplementary material for: Phenotypic and RNA-seq profiles identified key pathways and genes involved in gleditsioside biosynthesis in Gleditsia sinensis Lam
Source: Research Square preprint supplement (doi:10.21203/rs.3.rs-3021898/v1), 2023-06-16
Supplement: Supplementary file 2 [file 25dadc0861a10e49d860d7d3.xlsx]

## Sheet: Sheet1
Supplementary Table 6 Differential expressed unigenes of enzymes linking TBB with other parallel pathways in Gleditsia sinensis pods
Gene ID	Enzyme Name	GS1	GS2	GS3	GS4	GS5	GS6	Log2Ratio	Log2Ratio	Log2Ratio	Log2Ratio	Log2Ratio
								(GS2/GS1)	(GS3/GS1)	(GS4/GS1)	(GS5/GS1)	(GS6/GS1)
CL1276.Contig10	CAS	456.5	8	6.5	5	1.5	2.5	-5.74	-5.89	-6.566	-8.036	-6.687
CL1276.Contig2	CAS	332.5	5	0	5.5	0	0.5	-5.868	-18.204	-5.973	-18.2	-8.553
CL1276.Contig6	CAS	115	1	2	3.5	0.5	0	-6.785	-5.598	-5.099	-7.534	-16.396
CL1276.Contig7	CAS	503.5	6	4	7	0	0	-6.291	-6.724	-6.183	-18.8	-18.523
CL1276.Contig8	CAS	85.5	1	3	4	1.5	0	-6.357	-4.626	-4.028	-5.573	-15.969
CL1276.Contig1	CAS/TPS10	35	4.5	0	1.5	0	0	-2.857	-14.966	-4.61	-14.963	-14.684
CL12162.Contig5	CAS1	360	4112.5	9098.5	3716	6352	3540	3.829	4.886	3.524	4.33	4.078
CL8823.Contig1	CAS1	5	23.5	10	108	32	11.5	2.372	1.196	4.674	2.845	1.963
CL8823.Contig2	CAS1	46	466.5	292	1906.5	782	221.5	3.49	2.898	5.62	4.273	3.051
Unigene41849	CAS1	1	12.5	13	49	21	5	3.9	3.974	5.839	4.65	3.153
CL6166.Contig1	chlP	18.5	6.5	0.5	1.5	1.5	1.5	-1.451	-5.014	-3.688	-3.316	-2.828
CL6166.Contig2	chlP	262.5	20.5	17.5	22	16	16	-3.485	-3.677	-3.502	-3.743	-3.228
CL6166.Contig3	chlP	316	118	138	80.5	186	41.5	-1.255	-0.965	-2.003	-0.463	-2.122
CL6166.Contig4	chlP	169	13.5	8	12	4	4	-3.508	-4.176	-3.826	-5.146	-4.596
CL6166.Contig5	chlP	2886.5	207.5	135	170	89.5	86.5	-3.631	-4.184	-4.02	-4.729	-4.255
Unigene20940	chlP	37.5	3.5	5.5	2.5	4.5	6.5	-3.191	-2.549	-3.645	-2.765	-1.724
Unigene40649	chlP	12	37.5	14.5	91.5	73	211.5	1.969	0.573	3.075	2.882	4.999
CL12416.Contig1	COQ2	0	5	1	14	9	23	12.479	10.08	13.797	13.25	14.88
CL4637.Contig2	DHDDS	354.5	115	162	97	112	26	-1.379	-0.909	-1.778	-1.405	-2.983
CL5786.Contig1	DHDDS	149.5	58	568.5	792.5	189	62	-1.136	2.148	2.593	0.554	-0.474
CL5786.Contig2	DHDDS	40	24.5	209	222	28.5	12	-0.506	2.613	2.68	-0.281	-0.927
CL5786.Contig5	DHDDS	617.5	25.5	7.5	6.5	0	0.5	-4.389	-6.13	-6.542	-19.1	-9.453
CL5786.Contig6	DHDDS	13	2.5	61	68	6.5	3	-2.332	2.432	2.507	-0.826	-1.34
CL2663.Contig4	DOLPP1	0.5	0	0	1	0.5	15	-8.871	-8.876	1.401	0.105	5.652
CL2663.Contig5	DOLPP1	1	1.5	3.5	35.5	22.5	48.5	0.831	2.058	5.369	4.8	6.435
CL2663.Contig6	DOLPP1	3.5	0.5	5.5	33	15.5	19	-2.749	0.87	3.432	2.41	3.233
CL2663.Contig8	DOLPP1	11	29	21.5	133	132.5	112.5	1.565	1.164	3.773	3.805	4.135
CL12989.Contig1	GGPS	63.5	72	93	93.5	65	4	0.43	0.783	0.785	0.269	-3.223
CL12989.Contig2	GGPS	445	441	619	567.5	408.5	65.5	0.228	0.703	0.553	0.114	-1.975
CL3189.Contig1	GGPS	188.5	606	78	209.5	36	65.5	1.84	-1.051	0.293	-2.188	-0.738
CL3189.Contig2	GGPS	244	1880	493	661.5	154	86.5	3.143	1.233	1.462	-0.419	-0.718
CL3189.Contig3	GGPS	64.5	109.5	26.5	38.5	5.5	1.5	0.968	-1.052	-0.7	-3.364	-4.634
CL3189.Contig4	GGPS	398	201.5	60	99	23	1	-0.83	-2.493	-1.817	-3.954	-7.814
CL9250.Contig1	GGPS	668	256.5	310.5	253.5	328	105	-1.164	-0.879	-1.212	-0.776	-1.874
CL9250.Contig2	GGPS	288.5	128.5	177.5	140.5	204	34	-0.911	-0.474	-0.803	-0.263	-2.288
Unigene8064	GGPS	21967.5	2761	24	15	15.5	12	-2.913	-9.603	-10.302	-10.236	-10.021
CL9603.Contig3	HPT	73.5	14.5	6	12.5	2.5	1.5	-2.158	-3.386	-2.438	-4.696	-4.838
CL9603.Contig4	HPT	151	35	9	28.5	10.5	4	-1.95	-3.835	-2.292	-3.635	-4.46
CL1256.Contig18	HST	19	30.5	40	42	50.5	68.5	0.964	1.298	1.238	1.678	2.625
CL1256.Contig23	HST	1.5	11.5	18	15	16	19.5	3.208	3.766	3.334	3.643	4.446
CL2987.Contig1	HST	39.5	21.5	21	24	7.5	0.5	-0.676	-0.695	-0.505	-2.147	-5.544
CL1194.Contig11	IPT	0	126	237	147	198	2	17.182	17.947	17.216	17.633	11.355
CL12535.Contig6	IPT	8	27	79	76.5	72.5	6	2.2	3.568	3.416	3.407	0.4
CL13571.Contig10	IPT	112	138.5	244	158	189	334.5	0.571	1.357	0.635	0.994	2.366
CL13571.Contig8	IPT	48	43.5	105	95	120	4373.5	0.21	1.366	1.162	1.547	7.301
CL2993.Contig1	IPT	0	3	0.5	3.5	2	59	11.543	9.08	12.101	11.14	16.228
CL5575.Contig1	IPT	0	14	12	17.5	116.5	0	14.054	13.632	14.185	16.855	-
CL9428.Contig3	IPT	50.5	91	216	167	214.5	94.5	1.108	2.324	1.881	2.313	1.694
CL9808.Contig1	IPT	73.5	2	1	0.5	0	0	-5.034	-5.949	-7.258	-16.025	-15.748
CL9808.Contig2	IPT	63.5	4	0	0	0	0	-3.874	-15.819	-15.836	-15.815	-15.538
Unigene10458	IPT	33.5	21	0	9.5	11	1	-0.439	-14.894	-1.37	-1.452	-4.303
Unigene18342	IPT	110.5	20.5	8.5	13	2.5	6	-2.319	-3.485	-2.894	-5.282	-3.434
Unigene26059	IPT	0.5	1	3.5	1	25	49.5	1.215	2.969	0.896	5.885	7.388
Unigene4281	IPT	151.5	67	67.5	43	131.5	40.5	-0.962	-0.934	-1.724	0.065	-1.115
Unigene539	IPT	0.5	26	86.5	43.5	65	0	6.118	7.715	6.756	7.236	-8.503
CL12535.Contig4	IPT/SPS	62	21.5	7.5	8.5	10.5	11	-1.301	-2.829	-2.698	-2.34	-1.703
CL12535.Contig7	IPT/SPS	10	69	250	108.5	355	16	3.103	4.889	3.661	5.383	1.493
CL13148.Contig15	IPT/SPS	74.5	74	183	71.5	112	11	0.286	1.534	0.137	0.822	-1.958
CL13264.Contig1	IPT/SPS	53	0	0.5	0	0	0	-15.567	-6.491	-15.588	-15.568	-15.289
CL13571.Contig18	IPT/SPS	44	34.5	67	47.5	55	1569.5	0.005	0.836	0.32	0.546	5.937
CL13571.Contig19	IPT/SPS	30.5	106.5	196	188.5	199	365.5	2.137	2.928	2.867	2.932	4.36
CL13571.Contig3	IPT/SPS	26	65.5	126.5	82	117	322.5	1.7	2.524	1.888	2.4	4.408
CL13647.Contig1	IPT/SPS	44	16.5	21	12.5	11.5	0	-1.174	-0.819	-1.672	-1.681	-14.989
CL13937.Contig1	IPT/SPS	20	14	63	79	92	15	-0.219	1.911	2.149	2.483	0.397
CL1408.Contig10	IPT/SPS	1	26	35.5	21.5	23.5	0	4.968	5.374	4.566	4.762	-9.548
CL1408.Contig39	IPT/SPS	3.5	25.5	34	39	24	0.5	3.131	3.493	3.725	2.956	-2.004
CL14081.Contig1	IPT/SPS	52	0.5	0	0	0	0	-6.261	-15.524	-15.541	-15.519	-15.243
CL14081.Contig2	IPT/SPS	62	0	0.5	0	0	0	-15.776	-6.7	-15.797	-15.776	-15.499
CL14151.Contig14	IPT/SPS	12	4	68	31	8.5	4.5	-1.293	2.759	1.586	-0.27	-0.603
CL2296.Contig7	IPT/SPS	39	5	9	5.5	9.5	24	-2.814	-1.89	-2.675	-1.801	0.103
CL4477.Contig14	IPT/SPS	18	9	44	40.5	108	22.5	-0.757	1.51	1.38	2.802	1.114
CL5407.Contig1	IPT/SPS	5.5	26.5	18	18.5	53.5	4	2.453	1.945	2.014	3.543	0.338
CL6052.Contig2	IPT/SPS	154.5	72.5	41	83	53	38.5	-0.847	-1.688	-0.629	-1.302	-1.23
CL6864.Contig2	IPT/SPS	16	13	26.5	60	51.5	11	0.007	0.974	2.043	1.962	0.25
CL6926.Contig1	IPT/SPS	0.5	7.5	110.5	21.5	40	19.5	4.11	7.953	5.322	6.547	6.049
CL6926.Contig2	IPT/SPS	0	6	53	20	35.5	12	12.608	15.772	14.125	15.266	13.937
CL6926.Contig4	IPT/SPS	1	4	131.5	25.5	46	11	2.12	7.204	4.568	5.746	4.203
CL6926.Contig5	IPT/SPS	0.5	8.5	117.5	36.5	118	26	4.363	8.14	6.181	8.216	6.555
CL7727.Contig9	IPT/SPS	393	32	45	19	13	416	-3.36	-2.884	-4.321	-4.647	0.865
CL8359.Contig2	IPT/SPS	40.5	0.5	0.5	0	0	0	-5.908	-6.14	-15.187	-15.166	-14.889
CL8813.Contig3	IPT/SPS	73.5	173	221.5	127	109.5	2.5	1.477	1.822	1.024	0.787	-4.097
CL8961.Contig1	IPT/SPS	140.5	36	70	17	31	29	-1.698	-0.772	-2.869	-1.963	-1.486
CL8961.Contig2	IPT/SPS	151.5	44	82	40	40	46.5	-1.523	-0.658	-1.738	-1.712	-0.91
CL9352.Contig2	IPT/SPS	101.5	3	11.5	14.5	3	1	-4.882	-2.918	-2.652	-4.816	-5.843
CL9352.Contig3	IPT/SPS	16	0	3	1	0	0	-13.81	-2.19	-4.043	-13.809	-13.534
CL9352.Contig4	IPT/SPS	43	0	3	1.5	0	1.5	-15.27	-3.618	-4.919	-15.272	-4.097
CL9352.Contig7	IPT/SPS	35	0.5	3.5	7	2	0	-6.061	-3.102	-2.137	-3.848	-14.673
CL9352.Contig8	IPT/SPS	30.5	2.5	3.5	1.5	2.5	0	-3.393	-2.916	-4.412	-3.365	-14.486
CL9825.Contig2	IPT/SPS	0	1	20.5	12	29	2.5	10.258	14.4	13.398	14.988	11.691
Unigene10127	IPT/SPS	627	341	787	276	424.5	45.5	-0.572	0.563	-1.062	-0.321	-2.996
Unigene12343	IPT/SPS	0	14.5	52.5	19.5	63.5	7.5	14.082	15.774	14.104	16.013	13.237
Unigene12348	IPT/SPS	16	18	80.5	32.5	90	37.5	0.517	2.596	1.108	2.734	2.031
Unigene12384	IPT/SPS	3	6	2	3	12.5	20.5	1.182	-0.33	0.314	2.323	3.575
Unigene1344	IPT/SPS	15	47.5	42	53.5	30	14	1.979	1.712	2.027	1.215	0.684
Unigene22715	IPT/SPS	0	26	4	0	3	2	14.855	12.056	-	11.725	11.325
Unigene28702	IPT/SPS	93.5	78.5	164.5	88	102	7	0.099	1.062	-0.013	0.332	-2.94
Unigene42249	IPT/SPS	0	0	0	2	112.5	37	-	-	11.063	16.911	15.574
Unigene4469	IPT/SPS	5	13	15	13	12	44	1.774	1.826	1.537	1.493	3.939
Unigene4817	IPT/SPS	72	21	21	9.5	8.5	9.5	-1.597	-1.549	-2.828	-2.849	-2.14
Unigene5263	IPT/SPS	12	11	36	24.5	44	306.5	0.244	1.83	1.254	2.137	5.469
Unigene5782	IPT/SPS	160	23.5	10	5	2	0.5	-2.629	-3.773	-4.839	-6.09	-7.564
Unigene5824	IPT/SPS	1	5.5	55.5	10	66.5	0.5	2.784	6.062	3.343	6.32	-0.193
Unigene6524	IPT/SPS	179.5	16	2	0.5	0	0.5	-3.339	-6.241	-8.538	-17.304	-7.718
Unigene7298	IPT/SPS	21.5	143	200.5	77	70.5	8	3.104	3.458	1.938	1.926	-0.629
Unigene8324	IPT/SPS	101	53	62.5	72.5	55.5	6.5	-0.7	-0.459	-0.244	-0.647	-3.177
Unigene9965	IPT/SPS	9	8.5	7	71.5	29.5	14	0.178	-0.111	3.191	2.024	1.429
CL4051.Contig5	menA	32.5	7.5	8.5	5.5	7.5	0	-1.703	-1.709	-2.464	-1.861	-14.569
CL14306.Contig1	PSY	42	5.5	6.5	4	4	171.5	-2.866	-2.48	-3.237	-3.173	2.829
CL14306.Contig2	PSY	6	0	0.5	0	0.5	84	-12.394	-3.367	-12.415	-3.414	4.61
CL14306.Contig3	PSY	631.5	81.5	89.5	75	119	4075	-2.81	-2.596	-2.922	-2.147	3.495
CL14306.Contig4	PSY	6.5	0.5	0.5	0.5	1	55.5	-3.661	-3.524	-3.278	-2.573	3.867
CL301.Contig1	PSY	363	64.5	247	208	205	229.5	-2.284	-0.335	-0.593	-0.568	0.139
CL301.Contig2	PSY	565.5	100	334.5	256.5	172	158	-2.3	-0.528	-0.939	-1.458	-1.032
CL9957.Contig1	PSY	6.5	0	0	2	0.5	53	-12.514	-12.518	-1.472	-3.535	3.836
CL9957.Contig3	PSY	1	0.5	0	0	0	23.5	-0.888	-9.78	-9.797	-9.773	5.384
Unigene13104	PSY	65.5	23	19.5	22.5	0.5	0.5	-1.384	-1.523	-1.569	-6.889	-6.28
Unigene58263	PSY	25.5	0	0	0	0	0	-14.503	-14.508	-14.525	-14.504	-14.226
CL12212.Contig2	SPS	20.5	26	30.5	74	79	15.5	0.626	0.812	2.036	2.221	0.412
CL12535.Contig2	SPS	2	13	23.5	26.5	23.5	2	3.094	3.821	3.964	3.784	0.815
CL12535.Contig8	SPS	279	225.5	1030.5	582.5	891.5	50	0.073	2.13	1.139	1.928	-1.68
CL13002.Contig4	SPS	51.5	63.5	118.5	92.5	143	9	0.601	1.441	0.908	1.717	-1.725
CL13172.Contig1	SPS	128	88.5	91.5	61.5	93	10.5	-0.286	-0.248	-0.906	-0.22	-2.82
CL5956.Contig2	SPS	98	15	19.5	41	3.5	8.5	-2.601	-2.101	-1.121	-4.652	-2.75
CL5956.Contig3	SPS	107	13.5	21.5	50.5	21.5	24	-2.786	-2.086	-0.906	-2.111	-1.368
CL5956.Contig4	SPS	188	24.5	54	98	35	32	-2.76	-1.572	-0.793	-2.213	-1.767
CL5956.Contig5	SPS	52.5	5	8.5	17	1.5	5.5	-3.122	-2.389	-1.43	-4.965	-2.472
CL5956.Contig6	SPS	150.5	21.5	26.5	71.5	20	25	-2.61	-2.279	-0.947	-2.726	-1.799
CL6076.Contig5	SPS	72.5	61	31	11.5	16.5	1	-0.091	-1	-2.422	-1.964	-5.381
CL9716.Contig1	SPS	139.5	20.5	19	45	4.5	22.5	-2.531	-2.643	-1.434	-4.765	-1.844
CL9716.Contig2	SPS	83	14	6	20.5	3	4.5	-2.328	-3.553	-1.813	-4.574	-3.424
Unigene12758	SPS	276	24.5	14	23	13.5	28	-3.282	-4.077	-3.497	-4.099	-2.518
Unigene24231	SPS	20.5	0.5	0	0	0	0	-4.923	-14.185	-14.202	-14.181	-13.904
Unigene24450	SPS	44	2.5	5	8.5	0	3	-3.99	-2.895	-2.229	-15.283	-3.091
Unigene24451	SPS	84	17	5.5	21.5	3	7	-2.102	-3.709	-1.843	-4.644	-2.789
Unigene2510	SPS	44	0	0	0	0	0	-15.284	-15.288	-15.305	-15.284	-15.007
Unigene3005	SPS	2	3.5	7	22.5	16.5	0.5	1.099	1.98	3.564	3.273	-1.281
Unigene33093	SPS	5	12.5	46	26	38.5	6	1.628	3.443	2.365	3.197	1.074
Unigene33835	SPS	18.5	42.5	5.5	6	0	0	1.434	-1.529	-1.583	-14.033	-13.756
Unigene37676	SPS	0	3.5	27.5	32	1	0	12.066	14.842	15.204	9.979	-
Unigene51841	SPS	0	0	0	0	0.5	10	-	-	-	9.14	13.674
CL3899.Contig12	TPS10	18	2	0.5	0	0	0	-2.823	-4.971	-14.018	-13.997	-13.72
CL3911.Contig3	TPS10	37	1	10	0	0	0	-4.94	-1.63	-15.046	-15.025	-14.749
CL630.Contig2	TPS10	119	249	2.5	5.5	1.5	6	1.213	-5.341	-4.196	-6.046	-3.542
CL630.Contig5	TPS10	0	27.5	0.5	25	5.5	16.5	14.89	9.031	14.656	12.514	14.364
Unigene1037	TPS10	33.5	3	1	1	0	0	-3.403	-4.826	-4.605	-14.876	-14.601
Unigene1044	TPS10	25	1.5	0	1	0.5	0	-3.742	-14.477	-4.2	-5.494	-14.195
CL3333.Contig2	TPS14	48.5	170.5	26.5	15	2	0	2.02	-0.639	-1.767	-4.463	-15.162
CL3333.Contig3	TPS14	237.5	1196.5	199.5	126.5	22	1	2.535	-0.014	-0.967	-3.264	-7.081
CL3333.Contig4	TPS14	71.5	250.5	28	26.5	1	0	1.984	-1.121	-1.482	-6.021	-15.721
CL3333.Contig6	TPS14	40.5	250.5	30.5	19.5	2.5	0	2.831	-0.167	-1.118	-3.87	-14.893
Unigene32254	TPS14	312	6	2.5	66	22.5	7	-5.512	-6.752	-2.233	-3.506	-4.691
Unigene32256	TPS14	200	11.5	2.5	58	10.5	5370	-3.992	-6.079	-1.555	-4.065	5.504
Unigene32258	TPS14	59.5	4.5	2	25.5	8	389	-3.537	-4.667	-0.944	-2.591	3.465
Unigene32259	TPS14	109	4	2	3.5	0	3	-4.654	-5.543	-5.02	-16.595	-4.392
Unigene32260	TPS14	123.5	4.5	3	7	4	70	-4.426	-5.119	-4.206	-4.699	-0.062
Unigene32261	TPS14	37.5	1.5	0	11	0	79	-4.577	-15.056	-1.55	-15.051	1.841
CL3899.Contig7	TPS-Cin	42	19	3	0.5	0.5	0	-0.77	-3.578	-6.448	-6.074	-14.938
Unigene1043	TPS-Cin	23.5	1.5	0	0.5	0	0	-3.898	-14.376	-5.605	-14.372	-14.096
Red font：FDR≤0.05
GS1: May; GS2: June; GS3: July; GS4: August; GS5: September; GS6: October
