# Supplementary material for: Phenotypic and RNA-seq profiles identified key pathways and genes involved in gleditsioside biosynthesis in Gleditsia sinensis Lam
Source: Research Square preprint supplement (doi:10.21203/rs.3.rs-3021898/v1), 2023-06-16
Supplement: Supplementary file 2 [file 38b35c6ba061a0fdb89743c8.pdf]

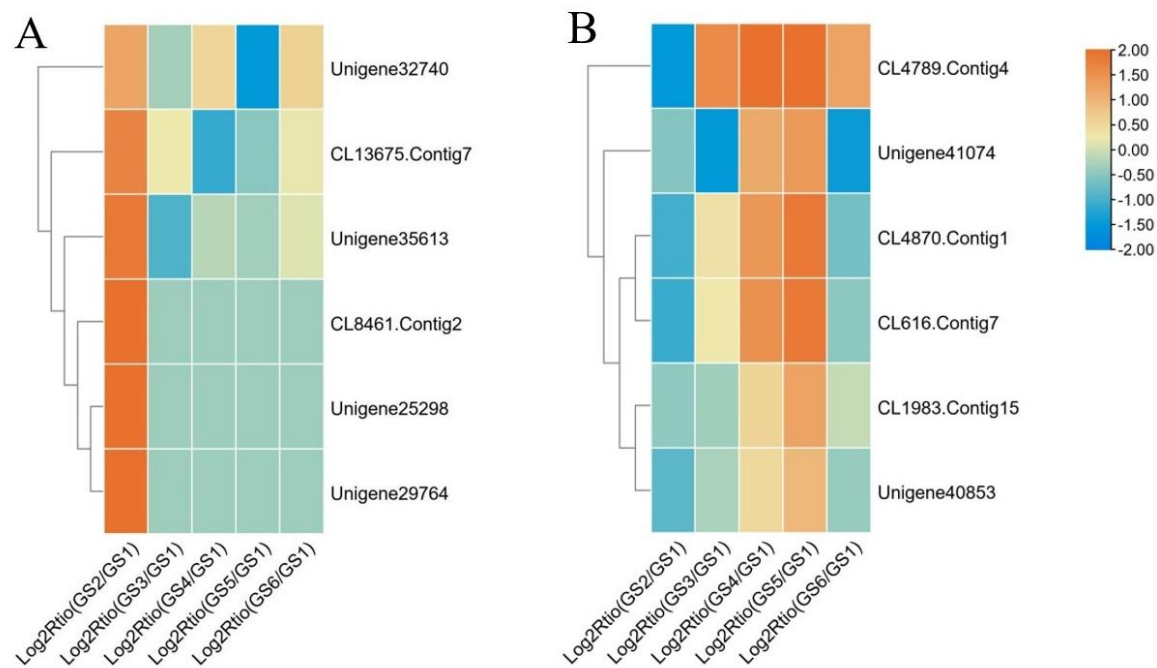

**Supplementary Figure 6:** Heatmap of Key genes screened by WGCNA. **(A)** Heatmap of Key genes in gleditsioside biosynthesis by WGCNA. **(B)** Heatmap of Key genes in pods development by WGCNA.
