# Supplementary material for: Phenotypic and RNA-seq profiles identified key pathways and genes involved in gleditsioside biosynthesis in Gleditsia sinensis Lam
Source: Research Square preprint supplement (doi:10.21203/rs.3.rs-3021898/v1), 2023-06-16
Supplement: Supplementary file 3 [file 4ef54b854a72383853dc2fe0.xlsx]

## Sheet: TF
Supplementary Table 9 Highly differential expressed unigenes coding TFs and enzymes from Gleditsia sinensis pods
TF	Log2Ratio(GS2/GS1)	Log2Ratio(GS3/GS1)	Log2Ratio(GS4/GS1)	Log2Ratio(GS5/GS1)	Log2Ratio(GS6/GS1)
CL1062.Contig12(bHLH)	1.388	0.485	0.475	2.701	3.163
CL1073.Contig5(WRKY)	7.288	8.412	7.046	8.163	5.256
CL10914.Contig1(SSGP)	-1.282	-1.593	-2.995	-1.92	-2.587
CL14216.Contig29(LHY)	-3.229	0.917	-1.533	-5.02	-1.516
CL14216.Contig3(LHY)	-2.96	0.691	-1.393	-4.924	-1.099
Unigene33343(ERF)	5.978	6.959	6.379	4.823	2.767
CL2043.Contig2(ERF)	1.514	1.605	1.997	1.658	2.118
CL2439.Contig4(ERF)	6.345	6.361	6.761	5.791	4.016
CL12523.Contig3(AGL)	2.344	2.278	2.456	1.935	-0.321
CL3118.Contig1(AGL)	1.739	0.63	1.101	0.533	-0.297
CL3360.Contig6(NAC)	3.424	4.707	4.901	5.375	9.616
CL3363.Contig3(NFXL1)	-0.128	0.192	0.334	0.461	2.237
CL3396.Contig1(COL)	-0.453	1.736	2.053	-2.508	2.39
CL5908.Contig2(HD-ZIP)	1.621	1.792	0.564	2.382	-0.564
CL5908.Contig4(HD-ZIP)	1.772	1.955	0.879	2.808	0.451
CL5936.Contig3(MYB)	0.159	1.493	0.641	1.146	1.065
CL12382.Contig4(bZIP)	1.998	1.804	1.603	1.693	2.301
CL6266.Contig1(bZIP)	0.919	2.226	2.401	3.032	0.294
CL6266.Contig2(bZIP)	1.458	1.545	1.743	2.638	1.405
CL6684.Contig2(Dof)	-1.717	-2.163	-1.726	-2.073	0.72
CL7137.Contig7(MYB)	1.205	1.094	1.019	0.952	0.779
CL7239.Contig1(HD-ZIP)	15.551	16.341	17.254	18.885	20.449
CL7937.Contig1(GATA)	-2.698	-2.143	-2.194	-3.603	-0.878
CL8715.Contig3(GRAS)	-3.89	-5.853	-6.69	-9.159	-10.192
CL9247.Contig3(EIN3)	2.314	2.215	2.317	2.544	1.583
CL9247.Contig5(EIN3)	1.305	1.731	1.438	1.858	1.272
Unigene13405(HD-ZIP)	2.795	3.886	3.494	2.607	6.523
Unigene1682(RRM)	0.363	-1.01	0.107	0.16	-0.355
Unigene17191(SCL28)	-3.771	-6.349	-8.384	-8.61	-7.957
Unigene17598(HSFA5)	2.417	3.049	3.463	4.004	4.175
Unigene17804(HMGB)	-2.441	-4.219	-4.736	-4.932	-3.121
Unigene25452(GATA)	2.329	2.724	2.914	3.104	-0.591
Unigene6867(HD-ZIP)	12.991	14.127	15.215	15.743	19.863
Unigene36596(HD-ZIP)	-0.448	-2.423	-8.221	-5.484	-8.361
CL7369.Contig1(bZIP)	0.944	0.251	-0.244	-0.47	-1.864
Unigene41063(bZIP)	1.167	1.971	2.667	2.937	0.926
CL4767.Contig2(ARF)	2.68	2.324	4.245	4.807	6.829
Unigene28867(ARF)	1.913	5.212	3.28	4.186	2.772
Unigene41089(ARF)	-0.615	-0.904	-2.558	-2.858	-3.574
Unigene4372(1-Sep)	1.815	1.766	1.769	1.726	3.072
Unigene4639(1-Sep)	1.492	1.29	0.857	1.247	1.828
CL10854.Contig1(ENIN)	-2.264	-3.406	-5.816	-3.737
CL10854.Contig2(ENIN)	-1.93	-3.484	-5.421	-4.43
CL13227.Contig1(ENIN)	4.854	4.462	5.359	5.679
CL13227.Contig2(ENIN)	14.699	14.416	15.839	16.998
CL2508.Contig1(ENIN)	-1.118	-0.425	0.142	-1.923
CL2508.Contig2(ENIN)	-1.956	-1.29	-1.16	-2.632
CL5366.Contig1(ENIN)	5.404	5.106	6.547	7.518
CL5366.Contig2(ENIN)	4.989	4.02	5.637	6.164
CL7334.Contig1(ENIN)	-3.18	-5.171	-7.946	-6.136
Unigene14332(ENIN)	8.943	3.663	-8.893	6.892
Unigene1738(ENIN)	0.479	-1.178	-1.669	-2.082
Unigene18078(ENIN)	-1.621	-4.37	-5.55	-6.317
Unigene1889(ENIN)	4.717	8.517	7.704	11.189
Unigene21651(ENIN)	0.975	1.645	1.939	2.728
Unigene24725(ENIN)	-1.556	-2.697	-5.105	-4.708
Unigene3580(ENIN)	-4.243	-6.627	-16.723	-16.703
Unigene37083(ENIN)	-1.619	-4.219	-4.87	-4.611
Unigene37275(ENIN)	1.574	0.498	0.437	1.216
CL1227.Contig10(AGBH)	1.722	2.503	3.256	5.015
CL2096.Contig4(AGBH)	0	0	8.788	0
CL3494.Contig14(AGBH)	0	12.08	0	12.258
CL5064.Contig5(AGBH)	-0.954	-0.907	-2.451	-3.772
CL5064.Contig7(AGBH)	-0.848	-0.832	-1.53	-1.102
CL7393.Contig1(AGBH)	1.514	2.878	2.801	3.762
CL7393.Contig2(AGBH)	1.99	2.837	2.184	3.016
CL7403.Contig8(AGBH)	-0.566	-0.977	-4.28	-3.207
CL752.Contig3(AGBH)	7.355	6.555	5.986	4.352
CL752.Contig4(AGBH)	9.67	9.073	8.691	7.301
CL7773.Contig4(AGBH)	0.609	1.449	1.104	2.923
CL9861.Contig1(AGBH)	-3.161	-3.304	-3.739	-4.271
Unigene17487(AGBH)	2.945	3.026	1.631	1.901
Unigene23352(AGBH)	11.514	11.373	10.373	10.725
Unigene36616(AGBH)	-0.265	-1.655	-1.302	-2.069
Unigene41033(AGBH)	1.891	1.81	2.034	2.133
Note:Red fonts represent high expression
