# Supplementary material for: Phenotypic and RNA-seq profiles identified key pathways and genes involved in gleditsioside biosynthesis in Gleditsia sinensis Lam
Source: Research Square preprint supplement (doi:10.21203/rs.3.rs-3021898/v1), 2023-06-16
Supplement: Supplementary file 4 [file 705ebc19ac4518d4cd768937.pdf]

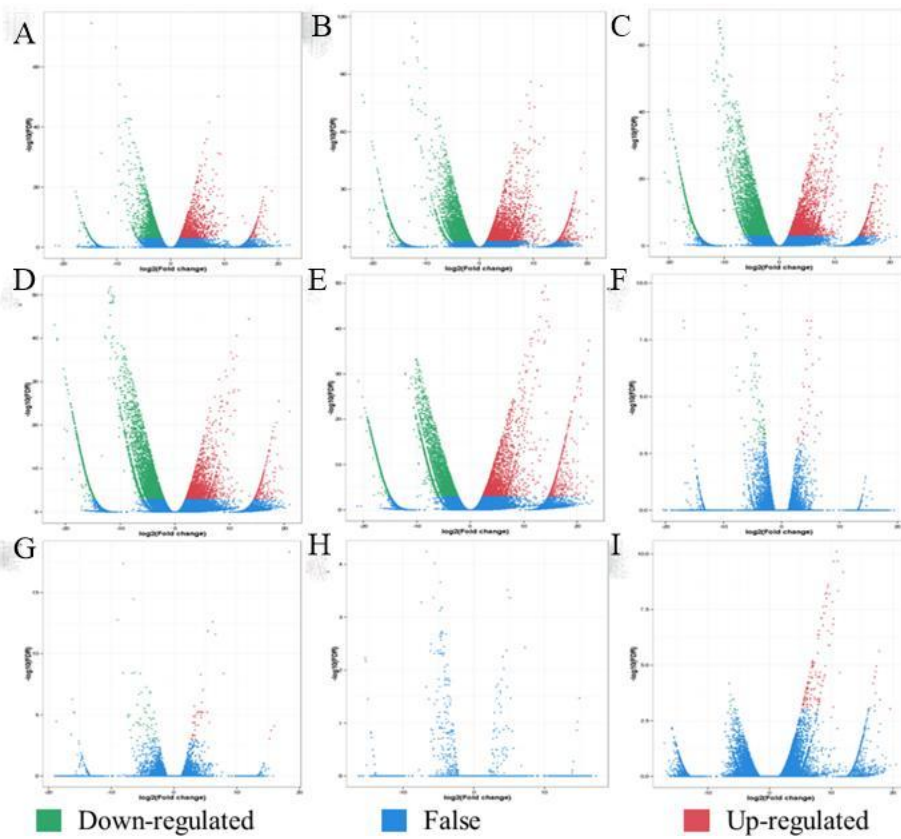

**Supplementary Figure 5:** Volcano plot of two differential comparison scheme. (A). Volcano plot of GS2 vs. GS1. (B). Volcano plot of GS3 vs. GS1. (C). Volcano plot of GS4 vs. GS1. (D). Volcano plot of GS5 vs. GS1. (E). Volcano plot of GS6 vs. GS1. (F). Volcano plot of GS3 vs. GS2. (G). Volcano plot of GS4 vs. GS3. (H). Volcano plot of GS5 vs. GS4. (I). Volcano plot of GS6 vs. GS5; GS1. May, GS2. June, GS3. July, GS4. Aug, GS5. Sept, GS6. Oct.
