# Supplementary material for: Phenotypic and RNA-seq profiles identified key pathways and genes involved in gleditsioside biosynthesis in Gleditsia sinensis Lam
Source: Research Square preprint supplement (doi:10.21203/rs.3.rs-3021898/v1), 2023-06-16
Supplement: Supplementary file 4 [file 725ab9c71659f00735bb0c87.xlsx]

## Sheet: Sheet1
Supplementary Table 4 Differentially expressed unigenes with their corresponding enzymes during gleditsioside biosynthesis of Gleditsia sinensis pods
Gene ID	Enzyme	Readcount						Log2Ratio	Log2Ratio	Log2Ratio	Log2Ratio	Log2Ratio
	name	GS1	GS2	GS3	GS4	GS5	GS6	(GS2/GS1)	(GS3/GS1)	(GS4/GS1)	(GS5/GS1)	(GS6/GS1)
CL6404.Contig2	ACAT	285.5	252.5	110.5	144	87.5	88.5	0.031	-1.141	-0.845	-1.482	-0.912
CL6404.Contig6	ACAT	150	116.5	70	90.5	64	19.5	-0.156	-0.865	-0.639	-0.991	-2.173
CL6404.Contig5	ACAT	137	123	43	37	31.5	22.5	0.035	-1.436	-1.685	-1.903	-1.829
Unigene1415	HMGCS	166.5	134.5	28.5	77	49	95.5	-0.124	-2.323	-0.974	-1.535	-0.014
Unigene29815	HMGCS	110.5	95	23.5	71	47	91	-0.042	-2.004	-0.526	-0.976	0.51
Unigene32740	HMGCS	99.5	853	113.5	213.5	49	145.5	3.309	0.423	1.287	-0.803	1.341
CL3701.Contig3	HMGCS	43	435.5	67.5	125.5	31	46.5	3.548	0.874	1.698	-0.239	0.891
Unigene21865	HMGCS	24	148.5	30	90	19	3.5	2.872	0.551	2.073	-0.129	-2.017
Unigene32742	HMGCS	20.5	146	26	64	12	5.5	3.07	0.582	1.82	-0.578	-1.121
CL3701.Contig1	HMGCS	20	183	52	134	25	10.5	3.439	1.601	2.871	0.534	-0.124
CL3701.Contig4	HMGCS	14.5	133	17	65.5	12.5	10.5	3.45	0.451	2.396	-0.016	0.303
Unigene37560	HMGCS	39.5	47.5	4.5	25.5	15.5	17	0.433	-2.92	-0.484	-1.104	-0.438
CL3701.Contig2	HMGCS	12	71	14	26.5	4	6.5	2.736	0.444	1.351	-1.373	-0.107
Unigene32741	HMGCS	6.5	77	16.5	59.5	11.5	9	3.762	1.54	3.354	1.028	1.225
CL5845.Contig1	HMGCR	2323	4884.5	5274.5	5434.5	7667.5	6526.5	1.372	1.411	1.481	1.971	2.266
CL1058.Contig6	HMGCR	409.5	2054.5	373.5	311	40.5	8.5	2.541	0.102	-0.453	-3.155	-4.797
CL1058.Contig5	HMGCR	107	378	152	126.5	32.5	10	2.028	0.729	0.242	-1.516	-2.653
CL1058.Contig4	HMGCR	106	422.5	72.5	83.5	11	0	2.206	-0.308	-0.401	-3.061	-16.282
CL1058.Contig1	HMGCR	78	513.5	117.5	88	18.5	3.5	2.928	0.821	0.125	-1.892	-3.687
CL1058.Contig3	HMGCR	47.5	184.5	28.5	22.5	2.5	0	2.179	-0.491	-1.101	-4.066	-15.122
CL1058.Contig2	HMGCR	31.5	115	41.5	28	9	1.5	2.086	0.614	-0.202	-1.571	-3.606
CL5845.Contig5	HMGCR	11	68.5	144	73	143	37	3.001	3.954	2.979	3.913	2.531
CL5845.Contig2	HMGCR	8	31.5	66.5	43.5	56.5	19.5	2.353	3.28	2.697	3.013	2.053
CL1749.Contig2	MVK	16.5	64.5	57.5	31.5	35	4.5	2.166	2.034	1.037	1.299	-1.092
CL1749.Contig19	MVK	14.5	67.5	13	13.5	12.5	1.5	2.432	0.095	0.141	0.026	-2.474
CL1749.Contig6	MVK	206	1229	210	239.5	184.5	166	2.784	0.264	0.298	0.098	0.484
CL1749.Contig7	MVK	23	114.5	29	32.5	18.5	27.5	2.544	0.565	0.534	-0.077	1.032
CL3112.Contig21	PMVK	47	58.5	86	153.5	88.5	22.5	0.617	1.109	1.917	1.165	-0.267
CL9703.Contig1	MVD	254.5	800	191	117	65	26.5	1.89	-0.178	-1.069	-1.735	-2.486
CL9703.Contig4	MVD	219	798.5	187	113	50.5	25	2.108	0.007	-0.883	-1.898	-2.351
CL1651.Contig3	IDI	91.5	52.5	46	43	24	8	-0.555	-0.76	-0.961	-1.722	-2.725
CL1651.Contig1	IDI	16807	6983.5	3282	4639	2020	5979	-1.064	-2.122	-1.674	-2.812	-0.69
CL1651.Contig4	IDI	32	22	18.5	6.5	3	3.5	-0.342	-0.565	-2.105	-3.236	-2.382
CL5057.Contig2	IDI	1.5	18	14.5	54.5	23.5	2	3.951	3.525	5.468	4.198	1.207
CL8656.Contig8	DXPS	799	245	355	204.5	167.5	35	-1.517	-0.94	-1.839	-1.993	-3.716
CL349.Contig2	DXPS	246	3925	518	426.5	52	3	4.197	1.303	0.728	-2.079	-5.573
CL8656.Contig2	DXPS	119	26	58.5	28.5	18	6.5	-1.988	-0.795	-1.944	-2.479	-3.399
CL8656.Contig4	DXPS	114	36	29	9	25	1	-1.417	-1.742	-3.72	-1.882	-6.01
CL349.Contig4	DXPS	73.5	1357	172	158.5	24.5	0.5	4.405	1.458	1.071	-1.41	-6.393
CL349.Contig1	DXPS	32.5	625.5	62.5	66	9	1	4.464	1.17	0.978	-1.666	-4.281
CL349.Contig3	DXPS	7.5	152.5	16.5	20.5	2	0	4.528	1.363	1.386	-1.776	-12.475
CL8656.Contig3	DXPS	53.5	21	16	6	8.5	2	-1.202	-1.519	-3.04	-2.372	-3.962
CL4174.Contig2	DXPS	27.5	2	5	3	2.5	0.5	-3.628	-2.221	-3.169	-3.319	-5.031
CL4174.Contig3	DXPS	27	0	1	1.5	0	8	-14.583	-4.532	-4.042	-14.583	-0.996
Unigene20486	DXPS	6	44	7.5	52.5	5.5	0.5	3.104	0.583	3.302	0.121	-2.808
Unigene20482	DXPS	3.5	23	4.5	47	2	0.5	2.968	0.604	3.966	-0.646	-2.038
Unigene10887	DXPS	0.5	20.5	2	5.5	0	0	5.55	2.179	3.355	-8.874	-8.591
Unigene20481	DXPS	0	20.5	2	25	6.5	1	14.608	11.08	14.697	12.817	10.31
CL13160.Contig1	DXR	5183.5	7108.5	1169	1312.5	480	1232	0.653	-1.912	-1.933	-3.214	-1.289
CL13160.Contig2	DXR	29	42	8	7.5	1	2.5	0.75	-1.619	-1.966	-4.7	-2.758
CL137.Contig2	ISPF	33	68.5	198.5	90	106.5	44	1.376	2.812	1.576	1.887	1.204
CL137.Contig1	ISPF	8.5	28	108	43.5	53.5	8	2.125	3.92	2.5	2.879	0.702
CL137.Contig15	ISPF	1.5	6	20.5	6.5	10.5	1.5	2.366	4.013	2.249	3.065	0.777
CL4067.Contig3	ISPG	5566	20762.5	19127.5	19816	22501	9757	2.11	2.005	2.033	2.249	1.604
CL4067.Contig4	ISPG	1226	2794	2731.5	3497	3108.5	1803.5	1.406	1.381	1.744	1.569	1.356
Unigene37461	ISPG	10	55	19	27	14	1.5	2.689	1.153	1.636	0.689	-1.939
CL5965.Contig12	FDPS	1035	1649	410	253.5	62	12	0.88	-1.09	-2.057	-3.85	-5.634
CL5965.Contig9	FDPS	552	303	187	280.5	223	287.5	-0.651	-1.329	-0.764	-1.05	-0.156
CL5965.Contig4	FDPS	253.5	536.5	104	76.5	20	5	1.287	-1.042	-1.756	-3.465	-4.896
CL5965.Contig11	FDPS	185.5	525.5	118	84	9.5	2.5	1.732	-0.407	-1.151	-4.089	-5.403
CL5965.Contig2	FDPS	131	206.5	45	21.5	12.5	2.5	0.866	-1.294	-2.568	-3.187	-4.948
CL5965.Contig8	FDPS	74.5	138	40.5	20.5	6.5	0	1.147	-0.645	-1.913	-3.348	-15.775
CL5965.Contig3	FDPS	41.5	99.5	29	24	0.5	2	1.472	-0.277	-0.831	-6.23	-3.59
CL4337.Contig1	FDFT1	80	308.5	48.5	107	58.5	146.5	2.168	-0.472	0.549	-0.18	1.685
CL4337.Contig6	FDFT1	29.5	101	28	33	26	40.5	1.991	0.171	0.278	0.077	1.258
CL4337.Contig5	FDFT1	28	103	21	47.5	23	21.5	2.088	-0.189	0.84	-0.071	0.411
CL4337.Contig8	FDFT1	22.5	156	27	55.5	28.5	17.5	3.013	0.499	1.338	0.586	0.439
CL4337.Contig3	FDFT1	21.5	108	27	45.5	20	16	2.549	0.554	1.138	0.111	0.373
CL4337.Contig10	FDFT1	15.5	73	18.5	21.5	16.5	29	2.443	0.493	0.607	0.3	1.697
Unigene6088	LUP4	796	6818.5	1631.5	1356.5	202	19.5	3.303	1.262	0.727	-1.797	-4.584
Unigene6284	LUP4	142	197	97	91	28.5	0.5	0.751	-0.318	-0.388	-2.167	-7.332
Unigene6232	LUP4	128	236	120	124.5	41.5	10	1.174	0.137	0.187	-1.472	-2.906
Unigene5699	LUP4	75.5	83	63	134.5	73	0.5	0.368	-0.041	1.169	0.103	-6.48
CL8823.Contig2	LUP4	46	466.5	292	1906.5	782	221.5	3.49	2.898	5.62	4.273	3.051
Unigene5698	LUP4	1.5	115	56.5	159.5	30	165	6.562	5.481	6.99	4.496	7.561
Unigene41849	LUP4	1	12.5	13	49	21	5	3.9	3.974	5.839	4.65	3.153
Unigene7128	LUP4/LUP2	73.5	102	67.5	184	96.5	2.5	0.725	0.106	1.689	0.553	-4.064
Unigene6364	LUP4	78	53.5	16	10	0.5	0.5	-0.298	-2.059	-2.804	-7.138	-6.529
Unigene4716	LUP4	205	289	188.5	212.5	169.5	16.5	0.764	0.106	0.304	-0.123	-2.871
Unigene10382	LUP4	186.5	187.5	135	232	113	0.5	0.276	-0.236	0.632	-0.565	-7.72
Unigene8640	LUP4	182	859	212	181.5	24.5	1	2.46	0.456	-0.038	-2.711	-6.695
Unigene10111	LUP4	162	251.5	118.5	85	36	3.5	0.909	-0.219	-0.71	-2.006	-4.738
Unigene5982	LUP4	49	355	167.5	507	86	120	3.124	2.005	3.64	0.971	2.058
Unigene4693	LUP4	18	130	45.5	28.5	48	150	3.049	1.555	0.611	1.664	3.834
CL8823.Contig1	LUP4	5	23.5	10	108	32	11.5	2.372	1.196	4.674	2.845	1.963
Unigene13954	LUP4/LUP2	25.5	9.5	12	25	1	0	-1.164	-0.871	0.148	-4.529	-14.229
Unigene7010	LUP4/LUP2	2	12	20	17	51	4.5	2.769	3.501	3.315	4.789	1.923
CL1870.Contig1	SQLE	98	18	9	1.5	0	0	-2.276	-3.199	-5.729	-16.437	-16.16
Unigene14674	SQLE	47.5	8	4.5	1	1	1	-2.429	-3.155	-5.628	-5.416	-4.808
CL14286.Contig2	SQLE	27.5	80.5	80.5	51.5	32	0	1.857	1.786	0.901	0.439	-14.333
CL1870.Contig32	SQLE	20.5	6.5	1	3.5	3	3	-1.472	-4.134	-2.448	-2.512	-2.013
CL14286.Contig1	SQLE	2036.5	3628	2094.5	1429	802	73	1.046	0.272	-0.45	-1.108	-4.016
CL11598.Contig2	SQLE	727	5221	1015.5	1215.5	317.5	296.5	3.045	0.716	0.798	-0.997	-0.524
Unigene29200	CYP93E1	2647.5	344	115	580	25.5	5	-2.745	-4.287	-1.989	-6.534	-8.245
Unigene29201	CYP93E1	116	13	3.5	24	0	0	-3.067	-4.789	-2.056	-16.672	-16.396
CL11248.Contig4	CYP93E1	16	1019.5	123.5	209.5	31	5	6.146	3.18	3.692	1.16	-0.876
CL11248.Contig5	CYP93E1	12.5	368.5	49.5	47	21.5	15.5	5.025	2.212	1.876	0.996	1.105
CL13356.Contig2	CYP93E1	0	116.5	108.5	256.5	136.5	422	17.083	16.821	18.187	17.074	19.037
CL4043.Contig3	CYP93E1	0	33	18.5	23	32.5	9	14.977	14.268	14.438	15.055	13.51
CL5836.Contig2	UGT	83	46.5	40	27.5	15.5	53	-0.549	-0.835	-1.542	-2.173	0.142
CL5836.Contig3	UGT	46.5	19	6.5	7.5	6.5	4	-1.053	-2.618	-2.327	-2.588	-2.77
CL6464.Contig2	UGT	6	111.5	64	131.5	66	43	4.37	3.625	4.712	3.614	3.62
CL6464.Contig3	UGT	1.5	87.5	104.5	127.5	108.5	45.5	5.997	6.337	6.684	6.367	5.698
CL6464.Contig4	UGT	33	47.5	68	177	141.5	27.5	0.738	1.265	2.672	2.262	0.529
CL9169.Contig2	UGT	0	2.5	1.5	28	12.5	2	11.444	10.632	14.861	13.636	11.355
CL9169.Contig3	UGT	65	200.5	13	94.5	14.5	321.5	1.725	-2.104	0.49	-1.977	3.078
Unigene25251	UGT	813	165	59	77.5	209.5	57.5	-2.171	-3.549	-3.431	-1.647	-3
Unigene37260	UGT	182	1904	4885.5	6319	6669	1945	3.659	4.977	5.393	5.413	4.224
	MVA pathway			MEP pathway			TCP pathway
Red font: FDR≤0.05
GS1, May;GS2, June;GS3, July; GS4, August;GS5,September;GS6，October.
