# Supplementary material for: Phenotypic and RNA-seq profiles identified key pathways and genes involved in gleditsioside biosynthesis in Gleditsia sinensis Lam
Source: Research Square preprint supplement (doi:10.21203/rs.3.rs-3021898/v1), 2023-06-16
Supplement: Supplementary file 5 [file 8de66583fba0c11bb706b45b.xlsx]

## Sheet: Sheet1
Supplementary Table 1 Quality of clean reads in 12 samples of Gleditsia sinensis pods after mRNA sequencing
Samples	Reads Number	Bases(bp)	Q20(%)	GC(%)
GS2-1	49880554	7482083100	96	44.1
GS2-2	41869912	6280486800	95.99	43.84
GS4-1	50284494	7542674100	95.83	44.01
GS4-2	43613832	6542074800	95.93	44.03
GS6-1	51039626	7655943900	96.15	44.4
GS6-2	48910186	7336527900	95.97	44.79
GS1-1	51103536	7665530400	96.59	44.14
GS1-2	50416142	7562421300	96.12	44.06
GS3-1	44658126	6698718900	95.64	44.27
GS3-2	48467016	7270052400	95.98	44.19
GS5-1	49959050	7493857500	96.03	44.06
GS5-2	46473346	6971001900	95.95	44.38
(GS2-1/2: Two samples in June; GS4-1/2: Two samples in August; GS6-1/2: Two samples in October; GS1-1/2: Two samples in May; GS3-1/2: Two samples in July; GS5-1/2: Two samples in September.)
