# Supplementary material for: Phenotypic and RNA-seq profiles identified key pathways and genes involved in gleditsioside biosynthesis in Gleditsia sinensis Lam
Source: Research Square preprint supplement (doi:10.21203/rs.3.rs-3021898/v1), 2023-06-16
Supplement: Supplementary file 6 [file 95e7c0fd6beb5f2b3cc16e4f.docx]

**Supplementary Table 5** Enzymes to link TBB with other pathways of terpenoid and ramification

| **Gene Name** | **Enzyme Full Name** | **Pathway** |
| --- | --- | --- |
| *IPT* | adenylate dimethylallyltransferase (cytokinin synthase) | ZTB |
| *TRIT1* | tRNA dimethylallyltransferase | ZTB |
| *TPS14* | (3S)-linalool synthase | MTB |
| *TPS10* | myrcene/ocimenesynthase | MTB |
| *TPS-Cin* | 1,8-cineolesynthase | MTB |
| *GA1* | ent-copalyl diphosphate synthase | DTB |
| *CAS* | casbene synthase | DTB |
| *PSY* | 15-cis-phytoene/all-trans-phytoene synthase | CTB |
| *HST* | homogentisate solanesyltransferase | UTB |
| *HPT* | homogentisate phytyltransferase | UTB |
| *COQ2* | 4-hydroxybenzoate polyprenyltransferase | UTB |
| *menA* | 1,4-dihydroxy-2-naphthoate octaprenyltransferase | UTB |
| *DOLPP1* | dolichyldiphosphatase | NGB |
| *DHDDS* | ditrans, polycis-polyprenyl diphosphate synthase | TBB—NGB |
| *GGPS* | geranylgeranyl diphosphate synthase, type II | TBB—DTB、CTB |
| *chlP* | geranylgeranyl diphosphate | TBB—UTB |
| *SPS* | all-trans-nonaprenyl-diphosphate synthase | TBB—UTB |
| *CAS1* | cycloartenol synthase | STTB—STB |
