# Supplementary material for: Phenotypic and RNA-seq profiles identified key pathways and genes involved in gleditsioside biosynthesis in Gleditsia sinensis Lam
Source: Research Square preprint supplement (doi:10.21203/rs.3.rs-3021898/v1), 2023-06-16
Supplement: Supplementary file 6 [file b68aa9cbba160f3c3a4920bf.pdf]

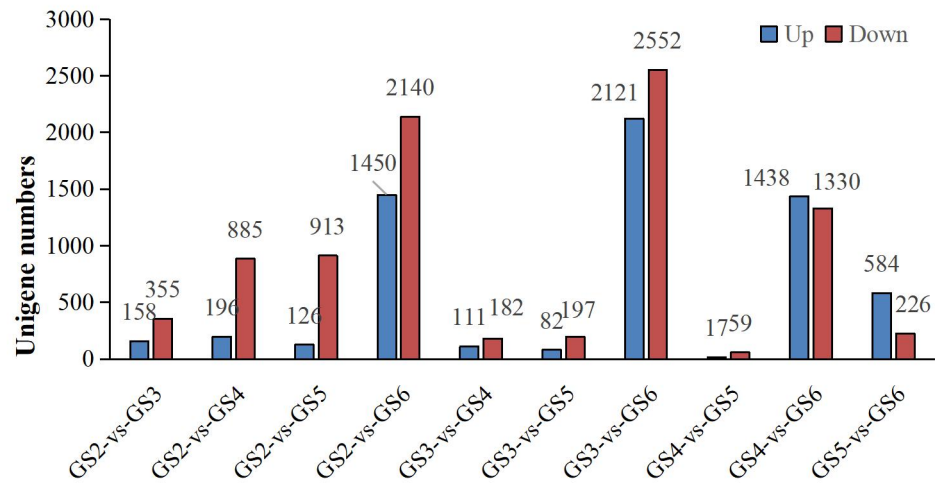

**Supplement figure 4:** Differentially expressed unigene statistics in comparable groups of *Gleditsia sinensis* pods
