# Supplementary material for: Phenotypic and RNA-seq profiles identified key pathways and genes involved in gleditsioside biosynthesis in Gleditsia sinensis Lam
Source: Research Square preprint supplement (doi:10.21203/rs.3.rs-3021898/v1), 2023-06-16
Supplement: Supplementary file 7 [file a6a7d01052198b0834fa126c.xlsx]

## Sheet: Supplementary Table 7
Supplementary Table 7 Information of all genes in Gleditsia sinensis
GeneID	A1	A2	B1	B2	C1	C2	D1	D2	E1	E2	Nr-Score	Nr-Evalue	Nr-annotation	Nt-ID	Nt-Score	Nt-Evalue	Nt-annotation	Swissprot-ID	Swissprot-Score	Swissprot-Evalue	Swissprot-annotation	COG-Protein-or-Domain	COG-Score	COG-Evalue	COG-ID	COG-Function-Description	KO_id	KEGG-Evalue	KEGG-Score	KEGG-Gene	ko_definition
CL10020.Contig1_All	0.432	9.3078	3.7083	10.2989	0.3332	0.4009	0	0	4.7693	8.1233	194.1	1e-57	Putative WRKY transcription factor 40 [Glycine soja] >gi|947113367|gb|KRH61669.1| hypothetical protein GLYMA_04G061400 [Glycine max]	gi|357437104|ref|XM_003588780.1|	163	7e-37	Medicago truncatula WRKY transcription factor (MTR_1g013760) mRNA, complete cds	Q9SAH7	150	5e-42	WRK40_ARATH Probable WRKY transcription factor 40 OS=Arabidopsis thaliana GN=WRKY40 PE=1 SV=1	--	--	--	--	--	K13424	9e-11	65.1	pop:POPTR_663578	WRKY transcription factor 33
CL10020.Contig2_All	0.8875	17.916	9.64	23.1655	0.1369	1.4413	0	0	6.7364	15.2846	312	7e-103	hypothetical protein PHAVU_001G042200g [Phaseolus vulgaris] >gi|561034559|gb|ESW33089.1| hypothetical protein PHAVU_001G042200g [Phaseolus vulgaris]	gi|502132482|ref|XM_004501325.1|	192	7e-46	PREDICTED: Cicer arietinum probable WRKY transcription factor 40-like (LOC101512217), transcript variant X2, mRNA	Q9SAH7	229	2e-72	WRK40_ARATH Probable WRKY transcription factor 40 OS=Arabidopsis thaliana GN=WRKY40 PE=1 SV=1	--	--	--	--	--	K13424	2e-19	91.7	sbi:SORBI_09g023270	WRKY transcription factor 33
CL10020.Contig3_All	0.4648	3.2667	1.0748	1.9486	0.1721	0	0	0	2.7488	3.5304	106.3	1e-25	unknown [Lotus japonicus]	gi|58219734|gb|AC128660.31|	101	2e-18	Medicago truncatula clone mth2-14p23, complete sequence	Q9SAH7	77	7e-16	WRK40_ARATH Probable WRKY transcription factor 40 OS=Arabidopsis thaliana GN=WRKY40 PE=1 SV=1	--	--	--	--	--	--	--	--	--	--
CL10097.Contig5_All	6.7218	5.2987	5.4284	3.8917	0.6829	1.2171	9.4614	8.499	7.5148	8.1956	760.8	0	PREDICTED: transcription factor bHLH3 [Vigna radiata var. radiata]	gi|571481471|ref|XM_006588602.1|	791	0	PREDICTED: Glycine max transcription factor bHLH3-like (LOC100819968), transcript variant X2, mRNA	O23487	454	3e-153	BH003_ARATH Transcription factor bHLH3 OS=Arabidopsis thaliana GN=BHLH3 PE=2 SV=1	--	--	--	--	--	K13422	4e-58	209	pop:POPTR_836925	transcription factor MYC2
CL10103.Contig2_All	4.5937	1.475	3.7057	8.036	0	0.4957	28.4859	32.1665	3.2856	1.4321	310.8	2e-105	hypothetical protein LR48_Vigan07g072400 [Vigna angularis] >gi|965665747|dbj|BAT81235.1| hypothetical protein VIGAN_03091100 [Vigna angularis var. angularis]	gi|403043517|ref|NM_001251187.2|	416	1e-113	Glycine max uncharacterized LOC100306391 (LOC100306391), mRNA	P81393	226	6e-74	MYB08_ANTMA Myb-related protein 308 OS=Antirrhinum majus GN=MYB308 PE=2 SV=1	ECU11g1690	110	9e-29	COG5147	Myb superfamily proteins, including transcription factors and mRNA splicing factors	K09422	1e-98	290	vvi:100251783	myb proto-oncogene protein, plant
CL10126.Contig2_All	14.6641	7.9414	0.4695	0.2754	0.1378	0.0691	2.3145	2.8897	1.673	3.825	429.9	1e-148	hypothetical protein GLYMA_19G236900 [Glycine max]	gi|571570006|ref|XM_003556452.2|	321	1e-84	PREDICTED: Glycine max transcription factor bHLH96-like (LOC100779213), mRNA	Q9SK91	260	2e-84	BH094_ARATH Transcription factor bHLH94 OS=Arabidopsis thaliana GN=BHLH94 PE=2 SV=2	--	--	--	--	--	K13422	3e-15	79.3	ppp:PHYPADRAFT_164647	transcription factor MYC2
CL10126.Contig3_All	42.3394	58.9924	2.6518	3.9902	3.6553	1.0688	80.1467	87.3958	6.682	31.3677	436.4	1e-148	PREDICTED: transcription factor bHLH94-like [Glycine max] >gi|947120340|gb|KRH68589.1| hypothetical protein GLYMA_03G240000 [Glycine max]	gi|571560208|ref|XM_003554616.2|	519	1e-144	PREDICTED: Glycine max transcription factor bHLH96-like (LOC100782243), mRNA	Q9C7T4	251	4e-79	BH096_ARATH Transcription factor bHLH96 OS=Arabidopsis thaliana GN=BHLH96 PE=2 SV=1	--	--	--	--	--	K13422	4e-14	77	ppp:PHYPADRAFT_164647	transcription factor MYC2
CL10150.Contig2_All	0.0571	0	0.09	0.1408	1.0568	1.2978	0.0538	0.027	0.1013	0.1275	102.4	1e-20	Myb family transcription factor APL [Glycine soja]	gi|502116763|ref|XM_004495525.1|	133	1e-27	PREDICTED: Cicer arietinum protein PHR1-LIKE 1-like (LOC101514885), transcript variant X2, mRNA	Q8GUN5	119	7e-36	PHL1_ARATH Protein PHR1-LIKE 1 OS=Arabidopsis thaliana GN=PHL1 PE=1 SV=1	--	--	--	--	--	K14491	1e-06	40	gmx:100776075	two-component response regulator ARR-B family
CL10150.Contig5_All	0.0312	0.2353	0.5255	1.0403	8.822	7.394	0.0589	0.2367	0.6283	0.6632	65.1	1e-08	Myb family transcription factor APL [Glycine soja]	gi|318611248|dbj|AB573720.1|	248	3e-62	Lupinus albus LaMYB-CC1 mRNA for MYB-CC transcription factor, partial cds	Q8GUN5	117	2e-53	PHL1_ARATH Protein PHR1-LIKE 1 OS=Arabidopsis thaliana GN=PHL1 PE=1 SV=1	--	--	--	--	--	K14491	1e-08	40.4	gmx:100776075	two-component response regulator ARR-B family
CL10150.Contig6_All	0	0.0454	0.1141	0.0446	0.9047	1.3436	0.0341	0	0.1713	0.0404	194.5	1e-119	Myb family transcription factor APL [Glycine soja]	gi|571552950|ref|XM_006603676.1|	295	1e-76	PREDICTED: Glycine max uncharacterized LOC100813604 (LOC100813604), transcript variant X4, mRNA	Q8GUN5	151	1e-65	PHL1_ARATH Protein PHR1-LIKE 1 OS=Arabidopsis thaliana GN=PHL1 PE=1 SV=1	--	--	--	--	--	K14491	1e-08	40.4	gmx:100776075	two-component response regulator ARR-B family
CL10150.Contig7_All	0.025	0.0628	0.0788	0.0617	4.3971	4.7792	0.0236	0.0473	0.0591	0.391	65.9	1e-08	Myb family transcription factor APL [Glycine soja]	gi|502116763|ref|XM_004495525.1|	133	2e-27	PREDICTED: Cicer arietinum protein PHR1-LIKE 1-like (LOC101514885), transcript variant X2, mRNA	Q8GUN5	118	1e-35	PHL1_ARATH Protein PHR1-LIKE 1 OS=Arabidopsis thaliana GN=PHL1 PE=1 SV=1	--	--	--	--	--	K14491	1e-06	40	gmx:100776075	two-component response regulator ARR-B family
CL10150.Contig8_All	0.1129	0.2361	0.3955	0.3712	4.772	3.3172	0.1418	0.1069	0.4006	0.2102	454.5	7e-151	Myb family transcription factor APL [Glycine soja]	gi|571552946|ref|XM_006603675.1|	408	1e-110	PREDICTED: Glycine max uncharacterized LOC100813604 (LOC100813604), transcript variant X3, mRNA	Q8GUN5	266	3e-81	PHL1_ARATH Protein PHR1-LIKE 1 OS=Arabidopsis thaliana GN=PHL1 PE=1 SV=1	--	--	--	--	--	K14491	3e-13	73.9	ath:AT3G62670	two-component response regulator ARR-B family
CL10150.Contig9_All	0.0634	0	0.0333	0.0391	2.2902	1.0891	0.0299	0	0.1126	0.1063	102.4	1e-20	Myb family transcription factor APL [Glycine soja]	gi|318611248|dbj|AB573720.1|	206	1e-49	Lupinus albus LaMYB-CC1 mRNA for MYB-CC transcription factor, partial cds	Q8GUN5	119	7e-44	PHL1_ARATH Protein PHR1-LIKE 1 OS=Arabidopsis thaliana GN=PHL1 PE=1 SV=1	--	--	--	--	--	K14491	1e-08	40.4	gmx:100776075	two-component response regulator ARR-B family
CL10210.Contig1_All	1.3121	0	0.6596	3.3766	0	0	0	0	2.0919	1.5294	546.2	0	NAC domain-containing protein 29 [Glycine soja]	gi|571502615|ref|XM_003541950.2|	531	1e-148	PREDICTED: Glycine max NAC transcription factor ONAC010-like (LOC100817193), mRNA	Q8GY42	249	3e-78	NAC25_ARATH NAC transcription factor 25 OS=Arabidopsis thaliana GN=NAC025 PE=2 SV=1	--	--	--	--	--	--	--	--	--	--
CL10233.Contig2_All	25.8096	24.25	37.782	24.3645	57.9072	57.9146	31.3249	32.1004	23.0266	33.4738	297.7	3e-98	PREDICTED: transcription factor bHLH148-like [Glycine max] >gi|947052925|gb|KRH02378.1| hypothetical protein GLYMA_17G035200 [Glycine max]	gi|571533319|ref|XM_003550868.2|	147	4e-32	PREDICTED: Glycine max transcription factor bHLH148-like (LOC100803765), mRNA	Q9C8Z9	206	1e-64	BH148_ARATH Transcription factor bHLH148 OS=Arabidopsis thaliana GN=BHLH148 PE=1 SV=1	--	--	--	--	--	--	--	--	--	--
CL10343.Contig1_All	0	0.0556	0.0932	0	0	0	0.7933	1.3007	0.1048	0	523.1	1e-180	PREDICTED: transcription factor TCP4-like [Vigna radiata var. radiata] >gi|951057800|ref|XP_014522078.1| PREDICTED: transcription factor TCP4-like [Vigna radiata var. radiata] >gi|951057803|ref|XP_014522079.1| PREDICTED: transcription factor TCP4-like [Vigna radiata var. radiata]	gi|292683041|dbj|AK339593.1|	264	4e-67	Lotus japonicus cDNA, clone: LjFL3-033-CA03, HTC	Q8LPR5	256	4e-78	TCP4_ARATH Transcription factor TCP4 OS=Arabidopsis thaliana GN=TCP4 PE=1 SV=1	--	--	--	--	--	--	--	--	--	--
CL10343.Contig3_All	0.3135	0.1124	0.0471	0.1105	0	0	2.2786	2.6715	0.1589	0	523.1	0	PREDICTED: transcription factor TCP4-like [Vigna radiata var. radiata] >gi|951057800|ref|XP_014522078.1| PREDICTED: transcription factor TCP4-like [Vigna radiata var. radiata] >gi|951057803|ref|XP_014522079.1| PREDICTED: transcription factor TCP4-like [Vigna radiata var. radiata]	gi|292683041|dbj|AK339593.1|	264	4e-67	Lotus japonicus cDNA, clone: LjFL3-033-CA03, HTC	Q8LPR5	256	4e-78	TCP4_ARATH Transcription factor TCP4 OS=Arabidopsis thaliana GN=TCP4 PE=1 SV=1	--	--	--	--	--	--	--	--	--	--
CL10431.Contig1_All	1.3985	0.4681	8.5262	7.4731	0	0	9.3117	13.1535	5.0731	4.0619	210.7	1e-65	Transcription factor HY5-like [Glycine soja]	gi|571524174|ref|XM_006598711.1|	216	4e-53	PREDICTED: Glycine max bZIP transcription factor bZIP69 (BZIP69), transcript variant X1, mRNA	Q8W191	144	2e-42	HYH_ARATH Transcription factor HY5-like OS=Arabidopsis thaliana GN=HYH PE=1 SV=1	--	--	--	--	--	K14432	2e-07	52	osa:4338907	ABA responsive element binding factor
CL10431.Contig2_All	1.1586	0.4847	21.1095	18.9305	0.1788	0.0896	16.8295	22.1232	6.8525	8.8441	250.8	1e-81	unknown [Lotus japonicus]	gi|571524174|ref|XM_006598711.1|	224	2e-55	PREDICTED: Glycine max bZIP transcription factor bZIP69 (BZIP69), transcript variant X1, mRNA	Q8W191	154	2e-46	HYH_ARATH Transcription factor HY5-like OS=Arabidopsis thaliana GN=HYH PE=1 SV=1	--	--	--	--	--	K14432	6e-08	54.3	aly:ARALYDRAFT_470374	ABA responsive element binding factor
CL1049.Contig4_All	5.3606	4.6256	0.7043	0.9812	1.3956	7.9669	5.0508	3.9257	1.3871	1.9649	112.5	1e-24	Transcription factor bHLH68 [Glycine soja]	gi|571469778|ref|XM_003530458.2|	490	1e-135	PREDICTED: Glycine max transcription factor bHLH68-like (LOC100785156), transcript variant 1, mRNA	Q8S3D1	228	2e-67	BH068_ARATH Transcription factor bHLH68 OS=Arabidopsis thaliana GN=BHLH68 PE=2 SV=2	--	--	--	--	--	--	--	--	--	--
CL1049.Contig8_All	8.6156	8.8355	0.994	2.3321	2.1884	8.1413	7.2762	5.969	2.0507	1.7605	548.1	0	PREDICTED: uncharacterized protein LOC100777095 isoform X2 [Glycine max] >gi|947111931|gb|KRH60257.1| hypothetical protein GLYMA_05G229500 [Glycine max]	gi|571469778|ref|XM_003530458.2|	664	0	PREDICTED: Glycine max transcription factor bHLH68-like (LOC100785156), transcript variant 1, mRNA	Q8S3D1	332	6e-109	BH068_ARATH Transcription factor bHLH68 OS=Arabidopsis thaliana GN=BHLH68 PE=2 SV=2	--	--	--	--	--	--	--	--	--	--
CL10551.Contig2_All	0.7076	0.296	0.2479	0	0	0	3.5557	3.2755	0	0	40.8	3e-11	PREDICTED: homeobox protein knotted-1-like 3 isoform X1 [Cicer arietinum]	gi|302398826|gb|HM122569.1|	69.9	7e-09	Malus x domestica HD domain class transcription factor (HD11) mRNA, complete cds	O04136	46.6	2e-11	KNAP3_MALDO Homeobox protein knotted-1-like 3 OS=Malus domestica PE=2 SV=1	--	--	--	--	--	--	--	--	--	--
CL10551.Contig3_All	1.9739	0	0	0	0	0	3.631	3.7379	0	0.315	--	--	--	gi|302398826|gb|HM122569.1|	75.8	9e-11	Malus x domestica HD domain class transcription factor (HD11) mRNA, complete cds	--	--	--	--	--	--	--	--	--	--	--	--	--	--
CL10554.Contig1_All	0.1894	1.5455	1.5432	2.5696	0.0438	0.1758	0.1785	0.3139	1.9607	2.4865	321.2	5e-104	ethylene-responsive transcription factor 3-like [Jatropha curcas] >gi|655346042|gb|AIC83902.1| C-repeat binding transcription factor 2 [Jatropha curcas]	gi|571442292|ref|XM_003519546.2|	182	1e-42	PREDICTED: Glycine max ethylene-responsive transcription factor 3-like (LOC100803943), mRNA	Q9SXS8	270	9e-87	ERF3_TOBAC Ethylene-responsive transcription factor 3 OS=Nicotiana tabacum GN=ERF3 PE=2 SV=1	--	--	--	--	--	K09286	3e-92	286	rcu:RCOM_0546450	EREBP-like factor
CL10554.Contig2_All	17.9741	59.9823	62.0699	71.4477	9.7873	8.0454	12.4524	13.7651	77.4158	95.7864	323.9	7e-106	C-repeat binding transcription factor 1 [Jatropha curcas]	gi|571442292|ref|XM_003519546.2|	167	6e-38	PREDICTED: Glycine max ethylene-responsive transcription factor 3-like (LOC100803943), mRNA	Q9SXS8	267	4e-86	ERF3_TOBAC Ethylene-responsive transcription factor 3 OS=Nicotiana tabacum GN=ERF3 PE=2 SV=1	--	--	--	--	--	K09286	1e-95	292	rcu:RCOM_0546450	EREBP-like factor
CL10554.Contig3_All	5.4752	13.9158	15.1073	11.7028	1.2671	1.3549	2.3644	2.4193	18.0262	22.8848	325.1	3e-105	C-repeat binding transcription factor 1 [Jatropha curcas]	gi|571442292|ref|XM_003519546.2|	182	1e-42	PREDICTED: Glycine max ethylene-responsive transcription factor 3-like (LOC100803943), mRNA	Q9SXS8	271	8e-87	ERF3_TOBAC Ethylene-responsive transcription factor 3 OS=Nicotiana tabacum GN=ERF3 PE=2 SV=1	--	--	--	--	--	K09286	5e-95	293	rcu:RCOM_0546450	EREBP-like factor
CL10554.Contig4_All	0.1527	1.0863	1.1773	1.3812	0.1414	0.3307	0.2878	0.241	1.7464	2.0474	316.6	9e-103	ethylene-responsive transcription factor 3-like [Jatropha curcas] >gi|655346042|gb|AIC83902.1| C-repeat binding transcription factor 2 [Jatropha curcas]	gi|571442292|ref|XM_003519546.2|	174	2e-40	PREDICTED: Glycine max ethylene-responsive transcription factor 3-like (LOC100803943), mRNA	Q9SXS8	271	2e-87	ERF3_TOBAC Ethylene-responsive transcription factor 3 OS=Nicotiana tabacum GN=ERF3 PE=2 SV=1	--	--	--	--	--	K09286	2e-95	292	rcu:RCOM_0546450	EREBP-like factor
CL10554.Contig5_All	1.6774	5.6727	5.8282	6.2627	0.6901	1.2107	1.2731	1.0588	7.22	8.7442	320.5	1e-103	C-repeat binding transcription factor 1 [Jatropha curcas]	gi|571442292|ref|XM_003519546.2|	174	3e-40	PREDICTED: Glycine max ethylene-responsive transcription factor 3-like (LOC100803943), mRNA	Q9SXS8	271	4e-87	ERF3_TOBAC Ethylene-responsive transcription factor 3 OS=Nicotiana tabacum GN=ERF3 PE=2 SV=1	--	--	--	--	--	K09286	1e-97	300	rcu:RCOM_0546450	EREBP-like factor
CL10554.Contig6_All	0.7872	1.7291	1.7239	2.346	0.0607	0.1218	0.3709	0.1242	1.94	2.2718	322.8	6e-107	ethylene-responsive transcription factor 3-like [Jatropha curcas] >gi|655346042|gb|AIC83902.1| C-repeat binding transcription factor 2 [Jatropha curcas]	gi|571442292|ref|XM_003519546.2|	198	1e-47	PREDICTED: Glycine max ethylene-responsive transcription factor 3-like (LOC100803943), mRNA	Q9SXS8	272	2e-89	ERF3_TOBAC Ethylene-responsive transcription factor 3 OS=Nicotiana tabacum GN=ERF3 PE=2 SV=1	--	--	--	--	--	K09286	5e-95	287	rcu:RCOM_0546450	EREBP-like factor
CL10590.Contig1_All	3.0909	0.6689	0.5602	0.5257	0.0987	0	1.4059	2.3211	0	0.3572	137.9	3e-39	MYB family transcription factor [Medicago truncatula] >gi|657401126|gb|KEH40146.1| MYB family transcription factor [Medicago truncatula]	gi|571508028|ref|XM_006595873.1|	212	5e-52	PREDICTED: Glycine max protein RADIALIS-like 1-like (LOC100804049), transcript variant X2, mRNA	F4JVB8	108	9e-30	RADL1_ARATH Protein RADIALIS-like 1 OS=Arabidopsis thaliana GN=RL1 PE=2 SV=1	--	--	--	--	--	--	--	--	--	--
CL10605.Contig1_All	4.8273	28.9366	6.9114	10.0581	0.077	0	0.2353	0.0788	7.0885	36.0743	189.5	1e-56	RAP2-like protein [Populus trichocarpa]	gi|356509853|ref|XM_003523611.1|	157	4e-35	PREDICTED: Glycine max ethylene-responsive transcription factor ERF016-like (LOC100808434), mRNA	Q9S7L5	134	2e-37	ERF18_ARATH Ethylene-responsive transcription factor ERF018 OS=Arabidopsis thaliana GN=ERF018 PE=2 SV=1	--	--	--	--	--	K09286	1e-25	103	aly:ARALYDRAFT_912628	EREBP-like factor
CL10605.Contig2_All	7.4099	61.1604	13.7152	16.5865	0.5965	0.1495	0.3036	0.4576	11.2422	67.3898	190.7	5e-57	RAP2-like protein [Populus trichocarpa]	gi|356509853|ref|XM_003523611.1|	157	4e-35	PREDICTED: Glycine max ethylene-responsive transcription factor ERF016-like (LOC100808434), mRNA	Q9S7L5	134	2e-37	ERF18_ARATH Ethylene-responsive transcription factor ERF018 OS=Arabidopsis thaliana GN=ERF018 PE=2 SV=1	--	--	--	--	--	K09286	1e-25	103	aly:ARALYDRAFT_912628	EREBP-like factor
CL10621.Contig2_All	17.487	44.464	30.0386	23.3644	0.4184	0.2904	5.4375	5.8922	57.9839	58.0596	997.3	0	PREDICTED: transcription factor MYC2-like [Vitis vinifera]	gi|502162506|ref|XM_004512468.1|	218	3e-53	PREDICTED: Cicer arietinum transcription factor MYC2-like (LOC101499336), mRNA	Q39204	676	0	MYC2_ARATH Transcription factor MYC2 OS=Arabidopsis thaliana GN=MYC2 PE=1 SV=2	--	--	--	--	--	K13422	0	997	vvi:100250607	transcription factor MYC2
CL10621.Contig3_All	2.3245	8.8337	5.6333	3.7821	0.1195	0.03	0.6996	1.1616	8.0961	9.6293	973	0	PREDICTED: transcription factor MYC2-like [Vitis vinifera]	gi|502162506|ref|XM_004512468.1|	218	3e-53	PREDICTED: Cicer arietinum transcription factor MYC2-like (LOC101499336), mRNA	Q39204	662	0	MYC2_ARATH Transcription factor MYC2 OS=Arabidopsis thaliana GN=MYC2 PE=1 SV=2	--	--	--	--	--	K13422	0	972	vvi:100250607	transcription factor MYC2
CL10621.Contig4_All	29.2159	72.5753	64.8447	69.0961	3.2812	3.4222	11.3348	11.4923	58.9111	85.391	951	0	PREDICTED: transcription factor MYC2-like [Vitis vinifera]	gi|502162506|ref|XM_004512468.1|	238	3e-59	PREDICTED: Cicer arietinum transcription factor MYC2-like (LOC101499336), mRNA	Q39204	660	0	MYC2_ARATH Transcription factor MYC2 OS=Arabidopsis thaliana GN=MYC2 PE=1 SV=2	--	--	--	--	--	K13422	0	951	vvi:100250607	transcription factor MYC2
CL10621.Contig5_All	10.5343	31.758	18.4788	11.946	0.2508	0.0314	3.383	3.4317	34.8583	40.6761	1006.1	0	PREDICTED: transcription factor MYC2-like [Vitis vinifera]	gi|502162506|ref|XM_004512468.1|	218	3e-53	PREDICTED: Cicer arietinum transcription factor MYC2-like (LOC101499336), mRNA	Q39204	690	0	MYC2_ARATH Transcription factor MYC2 OS=Arabidopsis thaliana GN=MYC2 PE=1 SV=2	--	--	--	--	--	K13422	0	1006	vvi:100250607	transcription factor MYC2
CL10621.Contig6_All	2.0662	4.1393	4.8449	4.6058	0.2207	0.3318	0.9359	0.9405	5.8281	7.59	965.3	0	PREDICTED: transcription factor MYC2-like [Vitis vinifera]	gi|502162506|ref|XM_004512468.1|	226	1e-55	PREDICTED: Cicer arietinum transcription factor MYC2-like (LOC101499336), mRNA	Q39204	662	0	MYC2_ARATH Transcription factor MYC2 OS=Arabidopsis thaliana GN=MYC2 PE=1 SV=2	--	--	--	--	--	K13422	0	965	vvi:100250607	transcription factor MYC2
CL10621.Contig7_All	0.3644	1.4554	0.7661	0.8579	0.0307	0.0307	0.1561	0.2196	0.9797	1.3694	991.9	0	PREDICTED: transcription factor MYC2-like [Vitis vinifera]	gi|502162506|ref|XM_004512468.1|	230	7e-57	PREDICTED: Cicer arietinum transcription factor MYC2-like (LOC101499336), mRNA	Q39204	689	0	MYC2_ARATH Transcription factor MYC2 OS=Arabidopsis thaliana GN=MYC2 PE=1 SV=2	--	--	--	--	--	K13422	0	991	vvi:100250607	transcription factor MYC2
CL1062.Contig11_All	6.2823	12.7375	12.1278	28.1573	0.3355	0.6727	3.6426	2.6882	19.1498	28.6789	338.2	1e-108	PREDICTED: transcription factor UNE12-like isoform X2 [Vitis vinifera]	gi|225445888|ref|XM_002276367.1|	153	8e-34	PREDICTED: Vitis vinifera uncharacterized LOC100243222 (LOC100243222), mRNA	Q9ZUG9	96.3	1e-21	BH066_ARATH Transcription factor bHLH66 OS=Arabidopsis thaliana GN=BHLH66 PE=2 SV=1	--	--	--	--	--	--	--	--	--	--
CL1062.Contig12_All	29.169	30.6484	10.7336	21.6254	66.1684	49.728	12.3403	10.5094	15.9651	17.3088	591.7	0	PREDICTED: transcription factor UNE12-like isoform X2 [Vitis vinifera]	gi|571477056|ref|XM_003533839.2|	383	1e-103	PREDICTED: Glycine max transcription factor bHLH66-like (LOC100807286), mRNA	Q9ZUG9	268	8e-84	BH066_ARATH Transcription factor bHLH66 OS=Arabidopsis thaliana GN=BHLH66 PE=2 SV=1	--	--	--	--	--	K12126	3e-16	83.6	aly:ARALYDRAFT_471048	phytochrome-interacting factor 3
CL1062.Contig1_All	4.0586	4.0349	1.4784	3.9146	6.398	6.2646	1.7038	1.1795	2.139	2.424	184.9	1e-48	PREDICTED: transcription factor bHLH66-like [Prunus mume]	gi|571477056|ref|XM_003533839.2|	406	1e-110	PREDICTED: Glycine max transcription factor bHLH66-like (LOC100807286), mRNA	Q9ZUG9	267	1e-82	BH066_ARATH Transcription factor bHLH66 OS=Arabidopsis thaliana GN=BHLH66 PE=2 SV=1	--	--	--	--	--	K12126	2e-16	84.7	ath:AT1G09530	phytochrome-interacting factor 3
CL1062.Contig3_All	10.8463	19.2447	13.6445	31.3155	1.1694	0.4042	6.1973	5.6092	18.8583	23.6971	598.2	0	PREDICTED: transcription factor UNE12-like isoform X2 [Vitis vinifera]	gi|571477056|ref|XM_003533839.2|	398	1e-107	PREDICTED: Glycine max transcription factor bHLH66-like (LOC100807286), mRNA	Q9ZUG9	278	2e-87	BH066_ARATH Transcription factor bHLH66 OS=Arabidopsis thaliana GN=BHLH66 PE=2 SV=1	--	--	--	--	--	K12126	6e-19	92	ath:AT1G09530	phytochrome-interacting factor 3
CL1062.Contig5_All	2.944	3.0186	1.3948	2.3521	4.1071	5.3101	1.68	1.0601	2.2562	1.297	599	0	PREDICTED: uncharacterized protein LOC100243222 isoform X1 [Vitis vinifera]	gi|571477056|ref|XM_003533839.2|	406	1e-110	PREDICTED: Glycine max transcription factor bHLH66-like (LOC100807286), mRNA	Q9ZUG9	275	1e-85	BH066_ARATH Transcription factor bHLH66 OS=Arabidopsis thaliana GN=BHLH66 PE=2 SV=1	--	--	--	--	--	K12126	2e-16	84.7	ath:AT1G09530	phytochrome-interacting factor 3
CL1062.Contig6_All	1.7184	0.5546	1.9095	0.5449	0.6817	0.8201	0.4626	0.3254	0.9292	0.9324	65.5	6e-09	PREDICTED: transcription factor UNE12-like isoform X2 [Vitis vinifera]	gi|147836161|emb|AM486521.2|	129	1e-26	Vitis vinifera contig VV78X151465.9, whole genome shotgun sequence	Q9ZUG9	52	7e-07	BH066_ARATH Transcription factor bHLH66 OS=Arabidopsis thaliana GN=BHLH66 PE=2 SV=1	--	--	--	--	--	--	--	--	--	--
CL1062.Contig9_All	6.5116	11.5783	7.7572	15.5241	0.2009	0.1511	2.9654	2.6203	11.2328	15.5179	597	0	PREDICTED: transcription factor UNE12-like isoform X2 [Vitis vinifera]	gi|571477056|ref|XM_003533839.2|	391	1e-105	PREDICTED: Glycine max transcription factor bHLH66-like (LOC100807286), mRNA	Q9ZUG9	278	5e-89	BH066_ARATH Transcription factor bHLH66 OS=Arabidopsis thaliana GN=BHLH66 PE=2 SV=1	--	--	--	--	--	K12126	4e-19	92	ath:AT1G09530	phytochrome-interacting factor 3
CL10670.Contig2_All	0.6993	1.0802	2.092	3.2501	0.2739	0.1497	3.1168	3.4123	1.9724	2.2232	213	4e-61	PREDICTED: homeobox-leucine zipper protein ATHB-52 [Vigna radiata var. radiata]	gi|571501102|ref|XM_003543178.2|	262	3e-66	PREDICTED: Glycine max uncharacterized LOC100812028 (LOC100812028), mRNA	Q9FN29	131	4e-35	ATB52_ARATH Homeobox-leucine zipper protein ATHB-52 OS=Arabidopsis thaliana GN=ATHB-52 PE=2 SV=1	ECU03g1170	50.8	4e-06	COG5576	Homeodomain-containing transcription factor	K09338	4e-23	101	aly:ARALYDRAFT_477377	homeobox-leucine zipper protein
CL10715.Contig7_All	0.5801	0.7725	0.6544	0.8549	0.7793	0.5711	0.4732	0.4555	3.4894	1.7464	81.6	0	PREDICTED: uncharacterized protein LOC101508115 [Cicer arietinum]	gi|571488507|ref|XM_006590896.1|	369	6e-98	PREDICTED: Glycine max transcription factor bHLH122-like (LOC100789855), transcript variant X5, mRNA	Q9C690	247	6e-72	BH122_ARATH Transcription factor bHLH122 OS=Arabidopsis thaliana GN=BHLH122 PE=1 SV=1	SPAC9.04	132	9e-68	COG2801	Transposase and inactivated derivatives	K01762	4e-13	76.6	gmx:100775969	1-aminocyclopropane-1-carboxylate synthase [EC:4.4.1.14]
CL1073.Contig10_All	0.6016	2.3595	1.5018	1.02	0	0.2442	0.0354	0.0356	2.0013	3.444	656.4	0	hypothetical protein GLYMA_14G200200 [Glycine max]	gi|571511644|ref|XM_003544860.2|	722	0	PREDICTED: Glycine max WRKY49 protein (WRKY49), mRNA	Q8S8P5	287	1e-87	WRK33_ARATH Probable WRKY transcription factor 33 OS=Arabidopsis thaliana GN=WRKY33 PE=1 SV=2	--	--	--	--	--	K13424	0	608	vvi:100243352	WRKY transcription factor 33
CL1073.Contig11_All	2.9803	19.0334	13.8209	9.8904	0.8926	1.7082	0.1239	0.083	19.7524	26.4872	880.6	0	PREDICTED: probable WRKY transcription factor 25 [Glycine max] >gi|947124559|gb|KRH72765.1| hypothetical protein GLYMA_02G232600 [Glycine max]	gi|571511644|ref|XM_003544860.2|	888	0	PREDICTED: Glycine max WRKY49 protein (WRKY49), mRNA	Q8S8P5	400	3e-132	WRK33_ARATH Probable WRKY transcription factor 33 OS=Arabidopsis thaliana GN=WRKY33 PE=1 SV=2	--	--	--	--	--	K13424	0	807	vvi:100243352	WRKY transcription factor 33
CL1073.Contig12_All	0.1367	0.3431	0.316	0.1685	0.0506	0.0254	0	0	0.9376	0.7939	113.6	2e-24	hypothetical protein GLYMA_14G200200 [Glycine max]	gi|571511644|ref|XM_003544860.2|	646	0	PREDICTED: Glycine max WRKY49 protein (WRKY49), mRNA	Q8S8P5	213	2e-59	WRK33_ARATH Probable WRKY transcription factor 33 OS=Arabidopsis thaliana GN=WRKY33 PE=1 SV=2	--	--	--	--	--	K13424	2e-173	524	vvi:100243352	WRKY transcription factor 33
CL1073.Contig13_All	1.2556	9.1481	5.0539	3.5121	0.1984	0.7957	0.0289	0.029	7.2812	11.4262	351.3	1e-110	PREDICTED: uncharacterized protein LOC101503578 isoform X1 [Cicer arietinum]	gi|571441398|ref|XM_003519225.2|	404	1e-109	PREDICTED: Glycine max WRKY39 protein (WRKY39), mRNA	Q8S8P5	218	2e-61	WRK33_ARATH Probable WRKY transcription factor 33 OS=Arabidopsis thaliana GN=WRKY33 PE=1 SV=2	--	--	--	--	--	K13424	5e-100	328	vvi:100243352	WRKY transcription factor 33
CL1073.Contig14_All	2.6267	14.7489	8.4283	5.9098	0.3413	2.4802	0.0868	0	19.7324	24.5547	113.6	1e-24	hypothetical protein GLYMA_14G200200 [Glycine max]	gi|571511644|ref|XM_003544860.2|	731	0	PREDICTED: Glycine max WRKY49 protein (WRKY49), mRNA	Q8S8P5	219	2e-63	WRK33_ARATH Probable WRKY transcription factor 33 OS=Arabidopsis thaliana GN=WRKY33 PE=1 SV=2	--	--	--	--	--	K13424	0	534	vvi:100243352	WRKY transcription factor 33
CL1073.Contig15_All	1.3236	20.8969	20.4296	22.2488	1.2897	2.2626	0	0.066	20.1061	24.7462	84	1e-15	transcription factor NtWRKY2 [Nicotiana tabacum]	gi|357458012|ref|XM_003599239.1|	159	1e-35	Medicago truncatula WRKY transcription factor (MTR_3g031220) mRNA, complete cds	Q8S8P5	125	3e-31	WRK33_ARATH Probable WRKY transcription factor 33 OS=Arabidopsis thaliana GN=WRKY33 PE=1 SV=2	--	--	--	--	--	K13424	2e-33	133	vvi:100243352	WRKY transcription factor 33
CL1073.Contig1_All	0.5532	10.7445	10.2838	4.7755	0.2156	0.7025	0	0.0276	11.366	16.9138	344	2e-107	PREDICTED: uncharacterized protein LOC101503578 isoform X1 [Cicer arietinum]	gi|17736896|dbj|AP004529.1|	297	4e-77	Lotus japonicus genomic DNA, chromosome 2, clone: LjT01K12, TM0058a, complete sequence	Q8S8P5	143	8e-36	WRK33_ARATH Probable WRKY transcription factor 33 OS=Arabidopsis thaliana GN=WRKY33 PE=1 SV=2	--	--	--	--	--	K13424	2e-66	236	vvi:100243352	WRKY transcription factor 33
CL1073.Contig20_All	0.2344	1.896	0.8487	0.1927	0.0482	0.145	0	0	3.8818	4.2477	75.1	1e-11	PREDICTED: probable WRKY transcription factor 33 isoform X1 [Glycine max] >gi|947050833|gb|KRH00362.1| hypothetical protein GLYMA_18G208800 [Glycine max]	gi|571547700|ref|XM_006602627.1|	430	1e-117	PREDICTED: Glycine max probable WRKY transcription factor 33-like (LOC100792833), mRNA	Q8S8P5	169	9e-63	WRK33_ARATH Probable WRKY transcription factor 33 OS=Arabidopsis thaliana GN=WRKY33 PE=1 SV=2	--	--	--	--	--	K13424	3e-111	222	pop:POPTR_577093	WRKY transcription factor 33
CL1073.Contig21_All	0.2346	5.005	3.2464	2.5069	0	0.6893	0	0.037	3.977	5.5463	78.6	7e-13	PREDICTED: probable WRKY transcription factor 33 isoform X1 [Glycine max] >gi|947050833|gb|KRH00362.1| hypothetical protein GLYMA_18G208800 [Glycine max]	gi|571547700|ref|XM_006602627.1|	519	1e-144	PREDICTED: Glycine max probable WRKY transcription factor 33-like (LOC100792833), mRNA	Q8S8P5	291	2e-89	WRK33_ARATH Probable WRKY transcription factor 33 OS=Arabidopsis thaliana GN=WRKY33 PE=1 SV=2	--	--	--	--	--	K13424	4e-170	502	pop:POPTR_577093	WRKY transcription factor 33
CL1073.Contig22_All	0.1683	1.9361	0.5012	0.6571	0	0.1562	0	0.0266	1.7583	2.4751	75.1	1e-11	PREDICTED: probable WRKY transcription factor 33 isoform X1 [Glycine max] >gi|947050833|gb|KRH00362.1| hypothetical protein GLYMA_18G208800 [Glycine max]	gi|571547700|ref|XM_006602627.1|	519	1e-144	PREDICTED: Glycine max probable WRKY transcription factor 33-like (LOC100792833), mRNA	Q8S8P5	256	1e-74	WRK33_ARATH Probable WRKY transcription factor 33 OS=Arabidopsis thaliana GN=WRKY33 PE=1 SV=2	--	--	--	--	--	K13424	3e-134	418	pop:POPTR_577093	WRKY transcription factor 33
CL1073.Contig26_All	3.1414	35.8284	17.9746	20.4467	1.3149	6.2105	0.9523	0.7242	24.0079	42.1408	70.1	5e-10	Putative WRKY transcription factor 33 [Glycine soja]	gi|571547700|ref|XM_006602627.1|	678	0	PREDICTED: Glycine max probable WRKY transcription factor 33-like (LOC100792833), mRNA	Q8S8P5	367	2e-115	WRK33_ARATH Probable WRKY transcription factor 33 OS=Arabidopsis thaliana GN=WRKY33 PE=1 SV=2	--	--	--	--	--	K13424	1e-170	514	pop:POPTR_577093	WRKY transcription factor 33
CL1073.Contig28_All	0.6331	10.0654	6.2667	6.571	0.1465	1.4933	0.0249	0	7.7074	14.9404	75.1	1e-11	PREDICTED: probable WRKY transcription factor 33 isoform X1 [Glycine max] >gi|947050833|gb|KRH00362.1| hypothetical protein GLYMA_18G208800 [Glycine max]	gi|571547700|ref|XM_006602627.1|	519	1e-144	PREDICTED: Glycine max probable WRKY transcription factor 33-like (LOC100792833), mRNA	Q8S8P5	256	2e-74	WRK33_ARATH Probable WRKY transcription factor 33 OS=Arabidopsis thaliana GN=WRKY33 PE=1 SV=2	--	--	--	--	--	K13424	6e-135	422	pop:POPTR_577093	WRKY transcription factor 33
CL1073.Contig2_All	4.3833	19.0087	12.1093	6.5832	0.4162	2.7117	0.1324	0.0798	27.4203	30.0382	716.8	0	hypothetical protein GLYMA_14G200200 [Glycine max]	gi|571511644|ref|XM_003544860.2|	934	0	PREDICTED: Glycine max WRKY49 protein (WRKY49), mRNA	Q8S8P5	311	1e-94	WRK33_ARATH Probable WRKY transcription factor 33 OS=Arabidopsis thaliana GN=WRKY33 PE=1 SV=2	--	--	--	--	--	K13424	0	640	vvi:100243352	WRKY transcription factor 33
CL1073.Contig3_All	0.4983	6.7228	3.1424	11.6739	0.0577	0.578	0.1174	0	3.0942	10.2274	92	5e-18	hypothetical protein VIGAN_03113000 [Vigna angularis var. angularis]	gi|571511644|ref|XM_003544860.2|	555	1e-155	PREDICTED: Glycine max WRKY49 protein (WRKY49), mRNA	Q8S8P5	305	5e-98	WRK33_ARATH Probable WRKY transcription factor 33 OS=Arabidopsis thaliana GN=WRKY33 PE=1 SV=2	--	--	--	--	--	K13424	1e-153	451	vvi:100243352	WRKY transcription factor 33
CL1073.Contig4_All	0.4395	13.8706	6.3692	3.9489	0.0581	0.1457	0	0	6.499	13.3621	730.3	0	PREDICTED: probable WRKY transcription factor 25 [Glycine max] >gi|734369572|gb|KHN19135.1| Putative WRKY transcription factor 33 [Glycine soja] >gi|947067982|gb|KRH17125.1| hypothetical protein GLYMA_14G200200 [Glycine max]	gi|571511644|ref|XM_003544860.2|	773	0	PREDICTED: Glycine max WRKY49 protein (WRKY49), mRNA	Q8S8P5	358	5e-113	WRK33_ARATH Probable WRKY transcription factor 33 OS=Arabidopsis thaliana GN=WRKY33 PE=1 SV=2	--	--	--	--	--	K13424	0	681	vvi:100243352	WRKY transcription factor 33
CL1073.Contig5_All	9.0166	37.1448	24.4703	17.5496	1.1342	5.4226	0.1776	0.119	45.6352	59.4861	950.7	0	PREDICTED: probable WRKY transcription factor 25 [Glycine max] >gi|947124559|gb|KRH72765.1| hypothetical protein GLYMA_02G232600 [Glycine max]	gi|571511644|ref|XM_003544860.2|	1132	0	PREDICTED: Glycine max WRKY49 protein (WRKY49), mRNA	Q8S8P5	428	1e-139	WRK33_ARATH Probable WRKY transcription factor 33 OS=Arabidopsis thaliana GN=WRKY33 PE=1 SV=2	--	--	--	--	--	K13424	0	845	vvi:100243352	WRKY transcription factor 33
CL1073.Contig6_All	0.3891	4.005	7.9352	6.1901	0.2161	0.4333	0	0	5.9378	7.6506	231.5	3e-67	PREDICTED: uncharacterized protein LOC101500062 [Cicer arietinum]	gi|357458012|ref|XM_003599239.1|	165	3e-37	Medicago truncatula WRKY transcription factor (MTR_3g031220) mRNA, complete cds	Q8S8P5	129	3e-31	WRK33_ARATH Probable WRKY transcription factor 33 OS=Arabidopsis thaliana GN=WRKY33 PE=1 SV=2	--	--	--	--	--	K13424	5e-33	136	vvi:100243352	WRKY transcription factor 33
CL1073.Contig7_All	0.0928	0.5049	0.0651	0.2671	0	0.1723	0.0292	0	0.366	0.6913	88.2	5e-16	hypothetical protein GLYMA_14G200200 [Glycine max]	gi|571511644|ref|XM_003544860.2|	739	0	PREDICTED: Glycine max WRKY49 protein (WRKY49), mRNA	Q8S8P5	219	1e-61	WRK33_ARATH Probable WRKY transcription factor 33 OS=Arabidopsis thaliana GN=WRKY33 PE=1 SV=2	--	--	--	--	--	K13424	5e-179	534	vvi:100243352	WRKY transcription factor 33
CL1073.Contig9_All	0	0.6003	0.1005	1.0615	0	0.1775	0	0	1.2446	2.137	308.5	3e-102	WRKY39 [Glycine max]	gi|571441398|ref|XM_003519225.2|	412	1e-112	PREDICTED: Glycine max WRKY39 protein (WRKY39), mRNA	Q8S8P5	205	5e-62	WRK33_ARATH Probable WRKY transcription factor 33 OS=Arabidopsis thaliana GN=WRKY33 PE=1 SV=2	--	--	--	--	--	K13424	5e-91	284	vvi:100243352	WRKY transcription factor 33
CL10780.Contig2_All	0.9763	1.0369	1.9736	0.5557	4.3104	17.3538	0	0	0.6219	0	311.2	3e-101	Myb-related protein Zm1 [Glycine soja]	gi|571521742|ref|XM_006598151.1|	416	1e-113	PREDICTED: Glycine max MYB14 protein (MYB14), mRNA	P20024	225	2e-70	MYB1_MAIZE Myb-related protein Zm1 OS=Zea mays PE=2 SV=1	ECU11g1690	120	2e-31	COG5147	Myb superfamily proteins, including transcription factors and mRNA splicing factors	K09422	2e-91	281	pop:POPTR_760309	myb proto-oncogene protein, plant
CL10805.Contig1_All	3.878	0.2098	0.0703	0	0.1547	0	2.3309	1.4244	0	0.3361	1256.1	0	Homeobox-leucine zipper protein HDG11 [Glycine soja]	gi|571530352|ref|XM_003549141.2|	1443	0	PREDICTED: Glycine max homeobox-leucine zipper protein HDG11-like (LOC100785023), mRNA	Q9FX31	942	0	HDG11_ARATH Homeobox-leucine zipper protein HDG11 OS=Arabidopsis thaliana GN=HDG11 PE=1 SV=1	ECU06g0500	51.2	3e-07	COG5576	Homeodomain-containing transcription factor	K09338	0	942	ath:AT1G73360	homeobox-leucine zipper protein
CL10806.Contig1_All	0.0979	0	1.3375	3.7417	2.9901	11.7173	0	0	0.5789	0	278.5	1e-91	hypothetical protein PHAVU_001G088200g [Phaseolus vulgaris] >gi|561035128|gb|ESW33658.1| hypothetical protein PHAVU_001G088200g [Phaseolus vulgaris]	gi|356561711|ref|XM_003549075.1|	299	3e-78	PREDICTED: Glycine max probable WRKY transcription factor 56-like (LOC100788382), mRNA	Q9FYA2	180	8e-57	WRK75_ARATH Probable WRKY transcription factor 75 OS=Arabidopsis thaliana GN=WRKY75 PE=2 SV=1	--	--	--	--	--	K13423	6e-27	110	ath:AT2G30250	WRKY transcription factor 25
CL10806.Contig2_All	0	0.109	0.2738	0	1.1253	1.7727	0	0	0.9244	0.291	192.6	2e-57	hypothetical protein PHAVU_001G088200g [Phaseolus vulgaris] >gi|561035128|gb|ESW33658.1| hypothetical protein PHAVU_001G088200g [Phaseolus vulgaris]	gi|356561711|ref|XM_003549075.1|	387	1e-104	PREDICTED: Glycine max probable WRKY transcription factor 56-like (LOC100788382), mRNA	Q9FYA2	185	3e-58	WRK75_ARATH Probable WRKY transcription factor 75 OS=Arabidopsis thaliana GN=WRKY75 PE=2 SV=1	--	--	--	--	--	K13423	5e-27	111	ath:AT2G30250	WRKY transcription factor 25
CL10915.Contig1_All	0.5879	0	0.3862	0.1812	10.0002	32.3249	0	0.0696	0.1739	0	309.7	9e-101	AP2 domain class transcription factor [Medicago truncatula] >gi|355481123|gb|AES62326.1| AP2 domain class transcription factor [Medicago truncatula]	gi|571484205|ref|XM_006589426.1|	196	5e-47	PREDICTED: Glycine max ethylene-responsive transcription factor ERF110-like (LOC100777915), mRNA	Q70II3	158	4e-46	EF110_ARATH Ethylene-responsive transcription factor ERF110 OS=Arabidopsis thaliana GN=ERF110 PE=2 SV=2	--	--	--	--	--	K09286	1e-35	130	ath:AT1G43160	EREBP-like factor
CL10915.Contig2_All	0	0.3376	0.8169	3.391	4.0951	17.7244	0	0.0283	0.1061	0.0668	118.2	1e-25	ethylene response factor protein 4 [Betula platyphylla]	gi|357443594|ref|XM_003592027.1|	210	8e-51	Medicago truncatula Ethylene-responsive transcription factor ERF110 (MTR_1g098460) mRNA, complete cds	Q70II3	158	8e-44	EF110_ARATH Ethylene-responsive transcription factor ERF110 OS=Arabidopsis thaliana GN=ERF110 PE=2 SV=2	--	--	--	--	--	K09286	2e-32	125	ath:AT1G43160	EREBP-like factor
CL10953.Contig1_All	0.1929	0.2422	0.1775	0.0595	0	0.0224	1.7044	1.4159	0.0571	0.1078	275	1e-74	Myb-related protein 3R-1 [Glycine soja]	gi|571459492|ref|XM_003527778.2|	609	1e-170	PREDICTED: Glycine max myb-related protein 3R-1-like (LOC100811335), mRNA	Q9S7G7	332	2e-98	MB3R1_ARATH Myb-related protein 3R-1 OS=Arabidopsis thaliana GN=MYB3R-1 PE=2 SV=1	ECU11g1690	124	1e-31	COG5147	Myb superfamily proteins, including transcription factors and mRNA splicing factors	K09422	5e-72	253	sbi:SORBI_03g039470	myb proto-oncogene protein, plant
CL10953.Contig2_All	1.4445	0.6648	0.911	0.9797	0.2229	0.1787	4.8089	5.2656	0.4841	0.4034	157.5	1e-36	PREDICTED: myb-related protein 3R-1 isoform X2 [Glycine max]	gi|571459492|ref|XM_003527778.2|	759	0	PREDICTED: Glycine max myb-related protein 3R-1-like (LOC100811335), mRNA	Q9S7G7	628	0	MB3R1_ARATH Myb-related protein 3R-1 OS=Arabidopsis thaliana GN=MYB3R-1 PE=2 SV=1	ECU11g1690	152	4e-41	COG5147	Myb superfamily proteins, including transcription factors and mRNA splicing factors	K09422	2e-86	293	pop:POPTR_801938	myb proto-oncogene protein, plant
CL10953.Contig3_All	0.5887	0.3855	0.4305	0.3788	0	0.0475	4.3894	4.0717	0.1514	0.4003	1340.5	0	PREDICTED: myb-related protein 3R-1 isoform X1 [Glycine max] >gi|947113721|gb|KRH62023.1| hypothetical protein GLYMA_04G080600 [Glycine max]	gi|571459492|ref|XM_003527778.2|	759	0	PREDICTED: Glycine max myb-related protein 3R-1-like (LOC100811335), mRNA	Q9S7G7	627	0	MB3R1_ARATH Myb-related protein 3R-1 OS=Arabidopsis thaliana GN=MYB3R-1 PE=2 SV=1	ECU11g1690	152	4e-41	COG5147	Myb superfamily proteins, including transcription factors and mRNA splicing factors	K09422	8e-87	293	pop:POPTR_801938	myb proto-oncogene protein, plant
CL10977.Contig2_All	0.2536	1.5118	3.0653	6.6448	4.5773	14.0011	0.5973	0.3001	0.4499	0.2125	348.6	3e-116	hypothetical protein GLYMA_03G116700 [Glycine max]	gi|571468355|ref|XM_003530116.2|	361	2e-96	PREDICTED: Glycine max ethylene-responsive transcription factor ERF034-like (LOC100776436), mRNA	Q8LBQ7	230	6e-72	ERF34_ARATH Ethylene-responsive transcription factor ERF034 OS=Arabidopsis thaliana GN=ERF034 PE=2 SV=2	--	--	--	--	--	K09286	2e-48	168	vvi:100252531	EREBP-like factor
CL1098.Contig5_All	12.9249	10.8149	2.8819	2.5759	0.6043	0.7269	9.5947	6.6752	1.3899	4.0835	65.9	9e-11	MADS-box protein CMB1 [Glycine soja]	--	--	--	--	Q39685	48.9	7e-07	CMB1_DIACA MADS-box protein CMB1 OS=Dianthus caryophyllus GN=CMB1 PE=2 SV=1	--	--	--	--	--	K09264	4e-06	47.8	vvi:100232867	MADS-box transcription factor, plant
CL10994.Contig3_All	15.015	7.5619	7.3719	0.5804	16.5136	7.4254	61.4672	63.909	45.2097	28.4983	603.2	0	Basic helix-loop-helix DNA-binding family protein [Theobroma cacao] >gi|508703718|gb|EOX95614.1| Basic helix-loop-helix DNA-binding family protein [Theobroma cacao]	gi|571524898|ref|XM_003548147.2|	133	9e-28	PREDICTED: Glycine max transcription factor MYC2-like (LOC100804965), mRNA	O23090	281	4e-88	BH014_ARATH Transcription factor bHLH14 OS=Arabidopsis thaliana GN=BHLH14 PE=2 SV=1	--	--	--	--	--	K13422	8e-57	204	aly:ARALYDRAFT_890840	transcription factor MYC2
CL11004.Contig2_All	0.0737	0	0.0774	0	0	0	2.5681	2.0925	0	0.0823	493	1e-172	hypothetical protein PRUPE_ppa015753mg [Prunus persica] >gi|462423867|gb|EMJ28130.1| hypothetical protein PRUPE_ppa015753mg [Prunus persica]	gi|566178096|ref|XM_002308562.2|	202	7e-49	Populus trichocarpa zinc finger family protein (POPTR_0006s25410g) mRNA, complete cds	P69781	310	1e-103	GAT12_ARATH GATA transcription factor 12 OS=Arabidopsis thaliana GN=GATA12 PE=2 SV=1	YMR136w	60.1	4e-09	COG5641	GATA Zn-finger-containing transcription factor	--	--	--	--	--
CL1100.Contig3_All	0.3699	0.2709	0.1296	0.114	0	0.0286	0.6971	0.7881	0.1459	0.1378	525.8	1e-178	PREDICTED: transcription factor TCP20 [Vitis vinifera]	gi|225451500|ref|XM_002271913.1|	674	0	PREDICTED: Vitis vinifera transcription factor TCP20-like (LOC100253170), mRNA	Q9LSD5	306	6e-96	TCP20_ARATH Transcription factor TCP20 OS=Arabidopsis thaliana GN=TCP20 PE=1 SV=1	--	--	--	--	--	K01501	4e-06	52	rcu:RCOM_1258620	nitrilase [EC:3.5.5.1]
CL1100.Contig6_All	2.0783	1.0351	1.5604	1.017	0.0916	0.1225	3.1704	3.3734	1.1706	1.1792	525.8	2e-179	PREDICTED: transcription factor TCP20 [Vitis vinifera]	gi|225451500|ref|XM_002271913.1|	674	0	PREDICTED: Vitis vinifera transcription factor TCP20-like (LOC100253170), mRNA	Q9LSD5	306	2e-96	TCP20_ARATH Transcription factor TCP20 OS=Arabidopsis thaliana GN=TCP20 PE=1 SV=1	--	--	--	--	--	K01501	3e-06	52	rcu:RCOM_1258620	nitrilase [EC:3.5.5.1]
CL1100.Contig9_All	4.0727	3.7847	6.1334	1.7868	0.2538	0.4724	6.3833	7.2305	1.9919	2.6248	525.8	0	PREDICTED: transcription factor TCP20 [Vitis vinifera]	gi|225451500|ref|XM_002271913.1|	694	0	PREDICTED: Vitis vinifera transcription factor TCP20-like (LOC100253170), mRNA	Q9LSD5	306	1e-97	TCP20_ARATH Transcription factor TCP20 OS=Arabidopsis thaliana GN=TCP20 PE=1 SV=1	--	--	--	--	--	K01501	3e-06	52	rcu:RCOM_1258620	nitrilase [EC:3.5.5.1]
CL11055.Contig1_All	5.333	6.2645	0	0	0.6329	0.2538	0.2577	0.1942	1.1323	1.9858	505.4	8e-178	hypothetical protein LR48_Vigan401s001100 [Vigna angularis] >gi|965614958|dbj|BAU00591.1| hypothetical protein VIGAN_10220000 [Vigna angularis var. angularis]	gi|571490539|ref|XM_003538254.2|	505	1e-140	PREDICTED: Glycine max uncharacterized LOC100797787 (LOC100797787), mRNA	Q9SPG3	204	2e-61	MYB26_ARATH Transcription factor MYB26 OS=Arabidopsis thaliana GN=MYB26 PE=2 SV=1	ECU11g1690	115	2e-29	COG5147	Myb superfamily proteins, including transcription factors and mRNA splicing factors	K09422	5e-169	478	pop:POPTR_646666	myb proto-oncogene protein, plant
CL11055.Contig2_All	13.176	23.047	1.6207	2.0742	2.3356	2.0162	0	0.1327	2.9845	5.6369	463.4	2e-161	hypothetical protein LR48_Vigan401s001100 [Vigna angularis] >gi|965614958|dbj|BAU00591.1| hypothetical protein VIGAN_10220000 [Vigna angularis var. angularis]	gi|571490539|ref|XM_003538254.2|	543	1e-151	PREDICTED: Glycine max uncharacterized LOC100797787 (LOC100797787), mRNA	Q8LPH6	209	1e-63	MYB86_ARATH Transcription factor MYB86 OS=Arabidopsis thaliana GN=MYB86 PE=2 SV=1	ECU11g1690	112	3e-28	COG5147	Myb superfamily proteins, including transcription factors and mRNA splicing factors	K09422	1e-157	449	pop:POPTR_646666	myb proto-oncogene protein, plant
CL11102.Contig1_All	0.0486	0.061	0.9702	0.5991	6.7905	1.668	0	0	2.1836	0.814	551.2	0	PREDICTED: AP2-like ethylene-responsive transcription factor At1g16060 [Glycine max]	gi|356514510|ref|XM_003525901.1|	434	1e-118	PREDICTED: Glycine max AP2-like ethylene-responsive transcription factor At1g16060-like (LOC100804555), mRNA	Q94AN4	360	8e-120	AP2L1_ARATH AP2-like ethylene-responsive transcription factor At1g16060 OS=Arabidopsis thaliana GN=At1g16060 PE=2 SV=1	--	--	--	--	--	K09285	0	544	gmx:100804555	AP2-like factor, ANT lineage
CL11102.Contig2_All	0.2106	0.1322	3.7636	2.2076	11.4055	5.7168	0	0	7.5363	1.8822	574.3	0	PREDICTED: AP2-like ethylene-responsive transcription factor At1g16060 [Glycine max]	gi|571452794|ref|XM_006579154.1|	589	1e-165	PREDICTED: Glycine max AP2-like ethylene-responsive transcription factor At1g16060-like (LOC100795869), mRNA	Q94AN4	383	2e-129	AP2L1_ARATH AP2-like ethylene-responsive transcription factor At1g16060 OS=Arabidopsis thaliana GN=At1g16060 PE=2 SV=1	--	--	--	--	--	K09285	0	563	gmx:100804555	AP2-like factor, ANT lineage
CL11345.Contig2_All	0.684	0.505	0.1269	0	0.0372	0	0.7582	0.9905	0.0476	0.4045	124.4	5e-29	GATA transcription factor 10 [Glycine soja]	gi|543177222|gb|KF033646.1|	200	5e-48	Phaseolus vulgaris clone BE5D3047 GATA transcription factor mRNA, complete cds	Q9SV30	161	7e-44	GATA8_ARATH GATA transcription factor 8 OS=Arabidopsis thaliana GN=GATA8 PE=2 SV=1	YMR136w	57.8	6e-08	COG5641	GATA Zn-finger-containing transcription factor	--	--	--	--	--
CL11345.Contig3_All	0.5579	0.3939	0.5865	0.086	0	0	1.1499	1.6178	0.5362	0.3506	122.1	4e-28	GATA transcription factor 10 [Glycine soja]	gi|543177222|gb|KF033646.1|	200	6e-48	Phaseolus vulgaris clone BE5D3047 GATA transcription factor mRNA, complete cds	Q9SV30	161	1e-43	GATA8_ARATH GATA transcription factor 8 OS=Arabidopsis thaliana GN=GATA8 PE=2 SV=1	YMR136w	57.8	7e-08	COG5641	GATA Zn-finger-containing transcription factor	--	--	--	--	--
CL11345.Contig6_All	3.8899	2.1515	1.7325	0.3252	0.4272	0.3059	6.9574	7.3038	0.7019	2.2831	422.2	1e-144	PREDICTED: GATA transcription factor 11-like isoform X1 [Glycine max] >gi|947077596|gb|KRH26436.1| hypothetical protein GLYMA_12G174200 [Glycine max]	gi|543177222|gb|KF033646.1|	200	3e-48	Phaseolus vulgaris clone BE5D3047 GATA transcription factor mRNA, complete cds	Q6DBP8	181	2e-53	GAT11_ARATH GATA transcription factor 11 OS=Arabidopsis thaliana GN=GATA11 PE=2 SV=1	YMR136w	58.5	2e-08	COG5641	GATA Zn-finger-containing transcription factor	--	--	--	--	--
CL1136.Contig2_All	14.4034	8.0799	9.0548	8.6808	0.4716	0.9455	2.0946	1.7541	19.2836	15.1068	607.8	0	hypothetical protein LR48_Vigan02g180100 [Vigna angularis] >gi|965608065|dbj|BAT94556.1| hypothetical protein VIGAN_08116900 [Vigna angularis var. angularis]	gi|571568804|ref|XM_003555413.2|	339	8e-90	PREDICTED: Glycine max trihelix transcription factor PTL-like (LOC100787750), mRNA	Q9LZS0	310	4e-97	PTL_ARATH Trihelix transcription factor PTL OS=Arabidopsis thaliana GN=PTL PE=2 SV=1	--	--	--	--	--	--	--	--	--	--
CL1136.Contig3_All	18.5315	9.8727	15.4619	14.577	1.5632	1.5259	3.8941	2.2301	43.2104	31.0767	658.7	0	hypothetical protein PHAVU_007G104900g [Phaseolus vulgaris] >gi|561017016|gb|ESW15820.1| hypothetical protein PHAVU_007G104900g [Phaseolus vulgaris]	gi|571483859|ref|XM_003535450.2|	345	1e-91	PREDICTED: Glycine max trihelix transcription factor PTL-like (LOC100784522), mRNA	Q9LZS0	317	2e-99	PTL_ARATH Trihelix transcription factor PTL OS=Arabidopsis thaliana GN=PTL PE=2 SV=1	--	--	--	--	--	--	--	--	--	--
CL11408.Contig1_All	14.0897	9.143	3.3248	0.7092	0	0	23.2094	23.959	13.0384	8.7798	366.3	7e-126	hypothetical protein PHAVU_001G109500g [Phaseolus vulgaris] >gi|561035391|gb|ESW33921.1| hypothetical protein PHAVU_001G109500g [Phaseolus vulgaris]	gi|571525595|ref|XM_003548710.2|	270	3e-69	PREDICTED: Glycine max GATA transcription factor 9-like (LOC100812088), mRNA	O82632	142	8e-40	GATA9_ARATH GATA transcription factor 9 OS=Arabidopsis thaliana GN=GATA9 PE=2 SV=1	YMR136w	51.2	1e-06	COG5641	GATA Zn-finger-containing transcription factor	--	--	--	--	--
CL11408.Contig2_All	5.2401	4.5217	1.4918	0.5385	0	0.152	14.606	15.815	1.8724	2.1951	318.9	1e-103	hypothetical protein PHAVU_001G109500g [Phaseolus vulgaris] >gi|561035391|gb|ESW33921.1| hypothetical protein PHAVU_001G109500g [Phaseolus vulgaris]	gi|571525595|ref|XM_003548710.2|	242	1e-60	PREDICTED: Glycine max GATA transcription factor 9-like (LOC100812088), mRNA	O82632	140	3e-37	GATA9_ARATH GATA transcription factor 9 OS=Arabidopsis thaliana GN=GATA9 PE=2 SV=1	YMR136w	51.6	3e-06	COG5641	GATA Zn-finger-containing transcription factor	--	--	--	--	--
CL11408.Contig3_All	0.9969	0.7962	1.286	0.7264	0	0	2.647	2.5313	0.9112	1.5692	366.7	7e-121	hypothetical protein PHAVU_001G109500g [Phaseolus vulgaris] >gi|561035391|gb|ESW33921.1| hypothetical protein PHAVU_001G109500g [Phaseolus vulgaris]	gi|571525595|ref|XM_003548710.2|	319	8e-84	PREDICTED: Glycine max GATA transcription factor 9-like (LOC100812088), mRNA	Q9FH57	146	9e-39	GATA5_ARATH GATA transcription factor 5 OS=Arabidopsis thaliana GN=GATA5 PE=2 SV=1	YMR136w	50.8	7e-06	COG5641	GATA Zn-finger-containing transcription factor	--	--	--	--	--
CL11408.Contig4_All	7.0549	6.0672	1.1673	0.3222	0	0	13.6022	13.6691	3.5544	2.554	359.8	6e-121	GATA transcription factor 9 [Glycine soja]	gi|571556158|ref|XM_003553957.2|	242	1e-60	PREDICTED: Glycine max GATA transcription factor 5-like (LOC100786479), mRNA	O82632	144	3e-39	GATA9_ARATH GATA transcription factor 9 OS=Arabidopsis thaliana GN=GATA9 PE=2 SV=1	YMR136w	53.9	5e-07	COG5641	GATA Zn-finger-containing transcription factor	--	--	--	--	--
CL11408.Contig5_All	6.0268	5.52	6.1067	3.9503	0.2513	0	11.8685	11.6185	5.3307	8.4307	409.5	4e-139	hypothetical protein PHAVU_001G109500g [Phaseolus vulgaris] >gi|561035391|gb|ESW33921.1| hypothetical protein PHAVU_001G109500g [Phaseolus vulgaris]	gi|571525595|ref|XM_003548710.2|	319	6e-84	PREDICTED: Glycine max GATA transcription factor 9-like (LOC100812088), mRNA	Q9FH57	148	6e-40	GATA5_ARATH GATA transcription factor 5 OS=Arabidopsis thaliana GN=GATA5 PE=2 SV=1	YMR136w	50.8	6e-06	COG5641	GATA Zn-finger-containing transcription factor	--	--	--	--	--
CL1148.Contig2_All	1.6076	1.5133	2.8163	3.7995	6.5106	6.9617	1.704	2.3466	3.5655	2.6189	533.9	0	PREDICTED: myb-related protein 306-like [Glycine max] >gi|947065873|gb|KRH15016.1| hypothetical protein GLYMA_14G063400 [Glycine max]	gi|571507600|ref|XM_003545194.2|	392	1e-106	PREDICTED: Glycine max myb-related protein 306-like (LOC100781228), mRNA	Q9FDW1	170	3e-49	MYB44_ARATH Transcription factor MYB44 OS=Arabidopsis thaliana GN=MYB44 PE=2 SV=1	ECU11g1690	127	7e-34	COG5147	Myb superfamily proteins, including transcription factors and mRNA splicing factors	K09422	5e-138	402	vvi:100240975	myb proto-oncogene protein, plant
CL11498.Contig1_All	0.2612	0	1.0984	0.5369	0	0.8889	2.0511	4.4522	0.412	0.2918	267.3	2e-84	MYB-like DNA-binding domain protein [Theobroma cacao] >gi|508703330|gb|EOX95226.1| MYB-like DNA-binding domain protein [Theobroma cacao]	gi|571438313|ref|XM_006574473.1|	252	8e-64	PREDICTED: Glycine max transcription factor MYB12-like (LOC100814275), mRNA	O22264	163	7e-47	MYB12_ARATH Transcription factor MYB12 OS=Arabidopsis thaliana GN=MYB12 PE=2 SV=1	ECU11g1690	90.9	7e-21	COG5147	Myb superfamily proteins, including transcription factors and mRNA splicing factors	K09422	9e-69	221	vvi:100260656	myb proto-oncogene protein, plant
CL11498.Contig2_All	0	0.1588	0	0	0	0	8.1663	8.3862	0	0	342	2e-112	Transcription factor MYB12 [Glycine soja]	gi|571438313|ref|XM_006574473.1|	329	6e-87	PREDICTED: Glycine max transcription factor MYB12-like (LOC100814275), mRNA	O22264	265	1e-84	MYB12_ARATH Transcription factor MYB12 OS=Arabidopsis thaliana GN=MYB12 PE=2 SV=1	ECU11g1690	103	9e-25	COG5147	Myb superfamily proteins, including transcription factors and mRNA splicing factors	K09422	1e-98	302	vvi:100260656	myb proto-oncogene protein, plant
CL11533.Contig1_All	2.8898	4.9071	7.7427	7.9654	3.1995	1.7352	1.7084	0.912	4.2225	5.3802	525.8	0	PREDICTED: trihelix transcription factor GT-3b-like [Glycine max] >gi|947128552|gb|KRH76406.1| hypothetical protein GLYMA_01G150500 [Glycine max]	gi|571435449|ref|XM_003516448.2|	737	0	PREDICTED: Glycine max trihelix transcription factor GT-3b-like (LOC100812635), mRNA	O80450	225	1e-69	TGT3B_ARATH Trihelix transcription factor GT-3b OS=Arabidopsis thaliana GN=GT-3B PE=1 SV=1	--	--	--	--	--	K03125	2e-06	52.4	ppp:PHYPADRAFT_165727	transcription initiation factor TFIID subunit 1
CL11533.Contig3_All	2.0718	3.4522	3.8298	4.3167	0.8267	1.2596	0.8414	1.0823	4.4366	5.347	62.4	3e-08	Trihelix transcription factor GT-3b [Glycine soja]	gi|571435449|ref|XM_003516448.2|	603	1e-169	PREDICTED: Glycine max trihelix transcription factor GT-3b-like (LOC100812635), mRNA	O80450	135	6e-35	TGT3B_ARATH Trihelix transcription factor GT-3b OS=Arabidopsis thaliana GN=GT-3B PE=1 SV=1	--	--	--	--	--	K03125	4e-06	52.4	ppp:PHYPADRAFT_165727	transcription initiation factor TFIID subunit 1
CL11651.Contig2_All	1.4471	3.2433	0	0.0637	0.0478	0	0.7304	0.5872	1.2838	1.8474	360.1	6e-119	Nuclear transcription factor Y subunit A-9 [Glycine soja]	gi|571494851|ref|XM_003540477.2|	274	4e-70	PREDICTED: Glycine max nuclear transcription factor Y subunit A-9-like (LOC100782085), mRNA	Q945M9	154	3e-42	NFYA9_ARATH Nuclear transcription factor Y subunit A-9 OS=Arabidopsis thaliana GN=NFYA9 PE=2 SV=1	YGL237c	84	2e-17	COG5224	CCAAT-binding factor, subunit B	K08064	1e-120	360	gmx:100782085	nuclear transcription factor Y, alpha
CL1177.Contig10_All	3.0033	5.0928	2.3508	4.3338	1.5971	1.4824	0.8429	0.4235	3.7415	2.998	496.9	2e-167	PREDICTED: probable WRKY transcription factor 15 isoform X2 [Vigna radiata var. radiata]	gi|571436023|ref|XM_006573584.1|	450	1e-123	PREDICTED: Glycine max probable WRKY transcription factor 15-like (LOC100804089), transcript variant X2, mRNA	Q9STX0	299	3e-93	WRKY7_ARATH Probable WRKY transcription factor 7 OS=Arabidopsis thaliana GN=WRKY7 PE=2 SV=1	YLR175w	51.2	8e-06	COG0130	Pseudouridine synthase	K13425	1e-27	115	pop:POPTR_755334	WRKY transcription factor 22
CL117.Contig5_All	0.3891	0.5349	0.6817	0.6283	1.1835	1.5475	0.3317	0.4737	1.6109	1.0142	39.7	2e-43	reverse transcriptase family member [Glycine max]	--	--	--	--	--	--	--	--	--	--	--	--	--	K15198	9e-10	66.2	mtr:MTR_8g091830	transcription factor TFIIIB component B''
CL11858.Contig10_All	0.0467	0	0.0981	0	0.1512	0.3247	0	0	0.0276	0	191.4	2e-53	hypothetical protein PHAVU_002G0176001g, partial [Phaseolus vulgaris] >gi|561030202|gb|ESW28781.1| hypothetical protein PHAVU_002G0176001g, partial [Phaseolus vulgaris]	gi|571435998|ref|XM_003516553.2|	216	2e-52	PREDICTED: Glycine max transcription factor SPATULA-like (LOC100797351), transcript variant X1, mRNA	Q9FUA4	162	2e-43	SPT_ARATH Transcription factor SPATULA OS=Arabidopsis thaliana GN=SPT PE=1 SV=1	--	--	--	--	--	K12126	2e-23	107	ath:AT1G09530	phytochrome-interacting factor 3
CL11858.Contig11_All	0.1634	0.1305	0.4059	0.6959	1.691	2.3429	0.1259	0.1406	0.527	0.1327	174.5	5e-45	Transcription factor SPATULA [Glycine soja] >gi|918463593|gb|ALA09141.1| bHLH transcription factor, partial [Glycine max]	gi|571435998|ref|XM_003516553.2|	285	3e-73	PREDICTED: Glycine max transcription factor SPATULA-like (LOC100797351), transcript variant X1, mRNA	Q9FUA4	191	6e-53	SPT_ARATH Transcription factor SPATULA OS=Arabidopsis thaliana GN=SPT PE=1 SV=1	--	--	--	--	--	K12126	5e-25	113	ath:AT1G09530	phytochrome-interacting factor 3
CL11858.Contig13_All	0.0222	0.0558	0	0.1096	0.6993	0.9897	0	0.021	0.0526	0.0248	191.4	2e-53	hypothetical protein PHAVU_002G0176001g, partial [Phaseolus vulgaris] >gi|561030202|gb|ESW28781.1| hypothetical protein PHAVU_002G0176001g, partial [Phaseolus vulgaris]	gi|571435998|ref|XM_003516553.2|	218	4e-53	PREDICTED: Glycine max transcription factor SPATULA-like (LOC100797351), transcript variant X1, mRNA	Q9FUA4	162	3e-43	SPT_ARATH Transcription factor SPATULA OS=Arabidopsis thaliana GN=SPT PE=1 SV=1	--	--	--	--	--	K12126	5e-23	106	ath:AT1G09530	phytochrome-interacting factor 3
CL11858.Contig14_All	0.0632	0.0529	0	0.0519	0.351	0.7232	0.0198	0.0399	0.0747	0.1177	191.4	2e-53	hypothetical protein PHAVU_002G0176001g, partial [Phaseolus vulgaris] >gi|561030202|gb|ESW28781.1| hypothetical protein PHAVU_002G0176001g, partial [Phaseolus vulgaris]	gi|571435998|ref|XM_003516553.2|	218	4e-53	PREDICTED: Glycine max transcription factor SPATULA-like (LOC100797351), transcript variant X1, mRNA	Q9FUA4	162	4e-43	SPT_ARATH Transcription factor SPATULA OS=Arabidopsis thaliana GN=SPT PE=1 SV=1	--	--	--	--	--	K12126	6e-23	106	ath:AT1G09530	phytochrome-interacting factor 3
CL11858.Contig16_All	0.234	0.0587	0.3444	0.404	1.1265	2.4324	0.3528	0.0443	0.3322	0.3137	299.7	1e-93	PREDICTED: transcription factor SPATULA-like [Vigna radiata var. radiata]	gi|571435998|ref|XM_003516553.2|	285	1e-73	PREDICTED: Glycine max transcription factor SPATULA-like (LOC100797351), transcript variant X1, mRNA	Q9FUA4	151	4e-40	SPT_ARATH Transcription factor SPATULA OS=Arabidopsis thaliana GN=SPT PE=1 SV=1	--	--	--	--	--	K12126	4e-25	110	aly:ARALYDRAFT_471048	phytochrome-interacting factor 3
CL11858.Contig2_All	1.2918	0.6633	1.2344	3.1134	28.6986	12.0962	1.1065	1.4455	3.82	0.7871	287.7	3e-92	hypothetical protein GLYMA_11G0546001, partial [Glycine max]	gi|571435998|ref|XM_003516553.2|	381	1e-102	PREDICTED: Glycine max transcription factor SPATULA-like (LOC100797351), transcript variant X1, mRNA	Q9FUA4	170	8e-48	SPT_ARATH Transcription factor SPATULA OS=Arabidopsis thaliana GN=SPT PE=1 SV=1	--	--	--	--	--	K12126	1e-27	117	aly:ARALYDRAFT_471048	phytochrome-interacting factor 3
CL11858.Contig3_All	0.2693	0	0.364	0.2847	11.6465	7.2479	0.3988	0.1093	1.3198	0.086	200.3	2e-57	hypothetical protein PHAVU_002G0176001g, partial [Phaseolus vulgaris] >gi|561030202|gb|ESW28781.1| hypothetical protein PHAVU_002G0176001g, partial [Phaseolus vulgaris]	gi|571537271|ref|XM_006600898.1|	250	7e-63	PREDICTED: Glycine max transcription factor SPATULA-like (LOC100806962), transcript variant X3, mRNA	Q9FUA4	162	2e-43	SPT_ARATH Transcription factor SPATULA OS=Arabidopsis thaliana GN=SPT PE=1 SV=1	--	--	--	--	--	K12126	2e-23	106	ath:AT1G09530	phytochrome-interacting factor 3
CL11858.Contig9_All	0.0204	0	0.1073	0.1511	0.3214	0.7771	0.077	0.0387	0.0242	0	191.4	2e-53	hypothetical protein PHAVU_002G0176001g, partial [Phaseolus vulgaris] >gi|561030202|gb|ESW28781.1| hypothetical protein PHAVU_002G0176001g, partial [Phaseolus vulgaris]	gi|571435998|ref|XM_003516553.2|	218	5e-53	PREDICTED: Glycine max transcription factor SPATULA-like (LOC100797351), transcript variant X1, mRNA	Q9FUA4	162	4e-43	SPT_ARATH Transcription factor SPATULA OS=Arabidopsis thaliana GN=SPT PE=1 SV=1	--	--	--	--	--	K12126	6e-23	106	ath:AT1G09530	phytochrome-interacting factor 3
CL11900.Contig1_All	0	0.0836	0.91	3.367	0.0616	0	0	0	0.3151	0.5951	236.9	6e-72	AP2 domain class transcription factor [Medicago truncatula] >gi|355491562|gb|AES72765.1| AP2 domain class transcription factor [Medicago truncatula]	gi|502137366|ref|XM_004503004.1|	159	1e-35	PREDICTED: Cicer arietinum ethylene-responsive transcription factor ABR1-like (LOC101501295), mRNA	Q9FGF8	158	1e-43	ABR1_ARATH Ethylene-responsive transcription factor ABR1 OS=Arabidopsis thaliana GN=ABR1 PE=2 SV=1	--	--	--	--	--	K09286	3e-33	125	ath:AT1G43160	EREBP-like factor
CL11935.Contig1_All	2.3046	6.8977	10.311	6.4853	0.0547	0	1.2806	1.2309	9.5063	9.5056	360.9	2e-121	nuclear transcription factor Y subunit A-3 [Arachis hypogaea]	gi|571497540|ref|XM_003542302.2|	392	1e-106	PREDICTED: Glycine max nuclear transcription factor Y subunit A-3-like (LOC100792905), transcript variant 1, mRNA	Q93ZH2	156	4e-43	NFYA3_ARATH Nuclear transcription factor Y subunit A-3 OS=Arabidopsis thaliana GN=NFYA3 PE=2 SV=2	YGL237c	91.3	6e-20	COG5224	CCAAT-binding factor, subunit B	K08064	5e-46	162	sbi:SORBI_01g045500	nuclear transcription factor Y, alpha
CL11935.Contig2_All	2.763	10.2413	9.3029	7.1338	0	0	0.8949	1.1037	11.6434	14.0823	177.6	4e-49	nuclear transcription factor Y subunit A-3 [Arachis hypogaea]	gi|543177486|gb|KF033778.1|	254	4e-64	Phaseolus vulgaris clone BE5D2504 nuclear transcription factor Y subunit A-3-like isoform 2 mRNA, complete cds	Q9LNP6	92.4	4e-20	NFYA8_ARATH Nuclear transcription factor Y subunit A-8 OS=Arabidopsis thaliana GN=NFYA8 PE=2 SV=2	SPBC725.11c	57.8	3e-08	COG5224	CCAAT-binding factor, subunit B	K08064	1e-26	110	sbi:SORBI_01g045500	nuclear transcription factor Y, alpha
CL11935.Contig3_All	0.2507	1.337	1.8443	1.1591	0	0	0.2362	0.2373	1.5566	2.94	333.2	5e-111	nuclear transcription factor Y subunit A-3 [Arachis hypogaea]	gi|571497540|ref|XM_003542302.2|	392	1e-106	PREDICTED: Glycine max nuclear transcription factor Y subunit A-3-like (LOC100792905), transcript variant 1, mRNA	Q93ZH2	156	3e-43	NFYA3_ARATH Nuclear transcription factor Y subunit A-3 OS=Arabidopsis thaliana GN=NFYA3 PE=2 SV=2	YGL237c	91.3	5e-20	COG5224	CCAAT-binding factor, subunit B	K08064	6e-44	156	sbi:SORBI_01g045500	nuclear transcription factor Y, alpha
CL11935.Contig4_All	0.2809	6.5521	3.9616	1.0103	0	0	0.3529	0.3546	7.061	9.1263	--	--	--	gi|502165193|ref|XM_004513406.1|	65.9	4e-07	PREDICTED: Cicer arietinum nuclear transcription factor Y subunit A-3-like (LOC101488265), transcript variant X2, mRNA	--	--	--	--	--	--	--	--	--	--	--	--	--	--
CL11935.Contig5_All	0.2576	4.0692	2.3697	0.7678	0.0596	0	0.0405	0.183	5.435	7.0754	347.1	4e-108	nuclear transcription factor Y subunit A-3 [Arachis hypogaea]	gi|571497540|ref|XM_003542302.2|	392	1e-105	PREDICTED: Glycine max nuclear transcription factor Y subunit A-3-like (LOC100792905), transcript variant 1, mRNA	Q93ZH2	160	1e-42	NFYA3_ARATH Nuclear transcription factor Y subunit A-3 OS=Arabidopsis thaliana GN=NFYA3 PE=2 SV=2	YGL237c	91.3	2e-19	COG5224	CCAAT-binding factor, subunit B	K08064	5e-42	155	sbi:SORBI_01g045500	nuclear transcription factor Y, alpha
CL11935.Contig6_All	0.7268	4.0398	1.4188	0.128	0	0	0.3913	0.1966	2.5791	4.4074	160.6	3e-46	nuclear transcription factor Y subunit A-3 [Arachis hypogaea]	gi|571532044|ref|XM_006600097.1|	242	6e-61	PREDICTED: Glycine max nuclear transcription factor Y subunit A-8-like (LOC100777544), transcript variant X1, mRNA	Q93ZH2	90.9	9e-21	NFYA3_ARATH Nuclear transcription factor Y subunit A-3 OS=Arabidopsis thaliana GN=NFYA3 PE=2 SV=2	--	--	--	--	--	K08064	4e-26	104	sbi:SORBI_01g045500	nuclear transcription factor Y, alpha
CL11935.Contig7_All	0	5.6814	2.0687	0.4854	0	0	0	0.1863	9.3119	12.5314	51.2	3e-06	nuclear transcription factor Y subunit A-3 [Arachis hypogaea]	gi|388523184|gb|JQ918268.1|	125	5e-26	Medicago truncatula nuclear transcription factor Y subunit A3 (NF-YA3) mRNA, complete cds	--	--	--	--	--	--	--	--	--	--	--	--	--	--
CL11935.Contig8_All	0.2784	1.7468	0.7022	0.4805	0.0515	0	0.0525	0.1581	1.5804	1.6169	347.1	1e-115	nuclear transcription factor Y subunit A-3 [Arachis hypogaea]	gi|571497540|ref|XM_003542302.2|	392	1e-106	PREDICTED: Glycine max nuclear transcription factor Y subunit A-3-like (LOC100792905), transcript variant 1, mRNA	Q93ZH2	160	3e-44	NFYA3_ARATH Nuclear transcription factor Y subunit A-3 OS=Arabidopsis thaliana GN=NFYA3 PE=2 SV=2	YGL237c	91.3	6e-20	COG5224	CCAAT-binding factor, subunit B	K08064	2e-43	155	sbi:SORBI_01g045500	nuclear transcription factor Y, alpha
CL12066.Contig1_All	1.1337	1.3453	0.65	0.3304	0.0954	0.0383	1.3789	1.21	1.2191	0.9441	227.3	1e-58	hypothetical protein GLYMA_10G068100 [Glycine max]	gi|571482013|ref|XM_006588767.1|	733	0	PREDICTED: Glycine max uncharacterized LOC100816953 (LOC100816953), mRNA	--	--	--	--	--	--	--	--	--	K15200	0	647	gmx:100816953	general transcription factor 3C polypeptide 2
CL12168.Contig1_All	104.155	106.525	112.715	82.7556	2.3352	4.9064	65.3479	64.0335	83.6752	86.587	914.8	0	GRAS family transcription factor family protein [Theobroma cacao] >gi|508709132|gb|EOY01029.1| GRAS family transcription factor family protein [Theobroma cacao]	gi|384381394|gb|JF766606.2|	426	1e-116	Juglans regia cultivar Liaoning 2 GAI-like protein (GAI) mRNA, complete cds	Q6EI05	868	0	GAIPB_CUCMA DELLA protein GAIP-B OS=Cucurbita maxima GN=GAIPB PE=2 SV=1	--	--	--	--	--	K14494	0	901	pop:POPTR_719856	DELLA protein
CL12181.Contig3_All	6.4233	3.3592	1.9341	3.1766	1.5485	3.4771	5.4847	5.7651	2.2557	1.9433	66.2	8e-09	PREDICTED: scarecrow-like protein 6 [Vigna radiata var. radiata]	gi|480328070|gb|KC256980.1|	436	1e-119	Caragana korshinskii GRAS family transcription factor (GRAS) mRNA, partial cds	O81316	394	1e-126	SCL6_ARATH Scarecrow-like protein 6 OS=Arabidopsis thaliana GN=SCL6 PE=1 SV=1	--	--	--	--	--	K14494	2e-33	137	gmx:547718	DELLA protein
CL12218.Contig3_All	0.1813	0.1137	2.7625	4.0231	0.3356	0.4205	0.1281	0.1287	0.6968	0.2531	591.3	0	PREDICTED: transcriptional activator Myb [Cicer arietinum]	gi|571544357|ref|XM_006602137.1|	250	6e-63	PREDICTED: Glycine max transcription factor GAMYB-like (LOC102659401), transcript variant X2, mRNA	Q0JIC2	213	6e-61	GAM1_ORYSJ Transcription factor GAMYB OS=Oryza sativa subsp. japonica GN=GAM1 PE=2 SV=1	ECU11g1690	116	4e-29	COG5147	Myb superfamily proteins, including transcription factors and mRNA splicing factors	K09422	4e-104	326	vvi:100262343	myb proto-oncogene protein, plant
CL12238.Contig1_All	0.51	0.7041	0.0536	0	1.2274	0.4732	4.0841	4.1042	0.2413	4.1585	55.1	7e-06	Transcription factor bHLH93 [Glycine soja]	gi|571448359|ref|XM_006577744.1|	563	1e-157	PREDICTED: Glycine max transcription factor bHLH93-like (LOC100784380), transcript variant X1, mRNA	Q9LSL1	230	5e-70	BH093_ARATH Transcription factor bHLH93 OS=Arabidopsis thaliana GN=BHLH93 PE=1 SV=1	--	--	--	--	--	K13422	2e-13	74.3	pop:POPTR_676550	transcription factor MYC2
CL12238.Contig2_All	2.648	1.6618	0.0497	0	2.1886	0.7898	7.7968	6.2234	2.1255	9.1383	515.4	1e-178	Transcription factor bHLH93 [Glycine soja]	gi|571448359|ref|XM_006577744.1|	555	1e-155	PREDICTED: Glycine max transcription factor bHLH93-like (LOC100784380), transcript variant X1, mRNA	Q9LSL1	261	3e-81	BH093_ARATH Transcription factor bHLH93 OS=Arabidopsis thaliana GN=BHLH93 PE=1 SV=1	--	--	--	--	--	K13422	3e-13	74.3	pop:POPTR_676550	transcription factor MYC2
CL1226.Contig2_All	0.9703	1.1164	0.9774	3.0412	0.0749	0	2.0951	1.7609	0.813	0.8581	583.6	0	hypothetical protein LR48_Vigan05g132400 [Vigna angularis] >gi|965605298|dbj|BAT92474.1| hypothetical protein VIGAN_07120400 [Vigna angularis var. angularis]	gi|571462222|ref|XM_003526103.2|	595	1e-166	PREDICTED: Glycine max transcription factor bHLH123-like (LOC100797286), mRNA	Q8GXT3	300	1e-93	BH123_ARATH Transcription factor bHLH123 OS=Arabidopsis thaliana GN=BHLH123 PE=2 SV=1	--	--	--	--	--	--	--	--	--	--
CL1226.Contig3_All	0.9096	2.0351	1.4965	6.2421	0.0732	0.2569	4.1733	3.4449	1.3566	2.1205	582	0	hypothetical protein LR48_Vigan05g132400 [Vigna angularis] >gi|965605298|dbj|BAT92474.1| hypothetical protein VIGAN_07120400 [Vigna angularis var. angularis]	gi|571462222|ref|XM_003526103.2|	515	1e-143	PREDICTED: Glycine max transcription factor bHLH123-like (LOC100797286), mRNA	Q8GXT3	294	2e-91	BH123_ARATH Transcription factor bHLH123 OS=Arabidopsis thaliana GN=BHLH123 PE=2 SV=1	--	--	--	--	--	--	--	--	--	--
CL1228.Contig1_All	3.2003	6.2484	7.6358	6.7654	0.9875	1.1785	1.7231	1.3949	5.6484	7.3204	450.7	1e-153	hypothetical protein LR48_Vigan10g086200 [Vigna angularis] >gi|965617235|dbj|BAU02385.1| hypothetical protein VIGAN_11190200 [Vigna angularis var. angularis]	gi|571484418|ref|XM_003535572.2|	256	8e-65	PREDICTED: Glycine max heat stress transcription factor B-2a-like (LOC100808202), mRNA	Q9T0D3	300	1e-96	HFB2B_ARATH Heat stress transcription factor B-2b OS=Arabidopsis thaliana GN=HSFB2B PE=2 SV=1	SPAC2E12.02.02	95.9	4e-20	COG5169	Heat shock transcription factor	--	--	--	--	--
CL1228.Contig4_All	1.6613	4.1704	3.0303	3.7358	0.8594	0.6348	0.9208	0.7865	3.8147	4.5851	139.8	1e-119	hypothetical protein LR48_Vigan10g086200 [Vigna angularis] >gi|965617235|dbj|BAU02385.1| hypothetical protein VIGAN_11190200 [Vigna angularis var. angularis]	gi|571484418|ref|XM_003535572.2|	190	4e-45	PREDICTED: Glycine max heat stress transcription factor B-2a-like (LOC100808202), mRNA	Q9T0D3	179	2e-76	HFB2B_ARATH Heat stress transcription factor B-2b OS=Arabidopsis thaliana GN=HSFB2B PE=2 SV=1	SPAC2E12.02.02	75.9	3e-15	COG5169	Heat shock transcription factor	--	--	--	--	--
CL1228.Contig7_All	0.3439	1.6647	0.6713	1.3327	1.637	1.2308	0.1851	0.2326	0.6973	1.5365	460.3	5e-157	PREDICTED: heat stress transcription factor B-2a-like [Glycine max] >gi|947059695|gb|KRH09101.1| hypothetical protein GLYMA_16G196200 [Glycine max]	gi|571477681|ref|XM_003533163.2|	252	1e-63	PREDICTED: Glycine max heat stress transcription factor B-2b-like (LOC100817440), mRNA	Q9SCW4	294	5e-95	HFB2A_ARATH Heat stress transcription factor B-2a OS=Arabidopsis thaliana GN=HSFB2A PE=2 SV=1	SPAC2E12.02.02	97.1	2e-20	COG5169	Heat shock transcription factor	--	--	--	--	--
CL12299.Contig2_All	3.2697	3.4984	2.8171	3.5693	0.1985	0.4974	5.4544	4.9737	3.1068	3.4729	599	0	hypothetical protein LR48_Vigan09g214400 [Vigna angularis] >gi|965600222|dbj|BAT87400.1| hypothetical protein VIGAN_05076300 [Vigna angularis var. angularis]	gi|571513917|ref|XM_006596914.1|	894	0	PREDICTED: Glycine max uncharacterized LOC100500244 (LOC100500244), transcript variant X4, mRNA	Q944H2	462	3e-160	AB12I_ARATH Protein ABCI12, chloroplastic OS=Arabidopsis thaliana GN=ABCI12 PE=2 SV=1	slr1978	177	1e-50	COG0619	ABC-type cobalt transport system, permease component CbiQ and related transporters	K15200	2e-62	224	ota:Ot18g01630	general transcription factor 3C polypeptide 2
CL12326.Contig1_All	0.2881	0.7233	0	0	0	0	4.0724	1.4551	0	0.1073	278.1	2e-92	PREDICTED: ethylene-responsive transcription factor SHINE 2-like [Glycine max] >gi|947104062|gb|KRH52445.1| hypothetical protein GLYMA_06G068800 [Glycine max] >gi|947104063|gb|KRH52446.1| hypothetical protein GLYMA_06G068800 [Glycine max]	gi|571449459|ref|XM_003522569.2|	264	2e-67	PREDICTED: Glycine max ethylene-responsive transcription factor SHINE 2-like (LOC100806821), mRNA	Q9LFN7	224	3e-73	SHN2_ARATH Ethylene-responsive transcription factor SHINE 2 OS=Arabidopsis thaliana GN=SHN2 PE=2 SV=1	--	--	--	--	--	K09286	3e-21	90.5	ath:AT1G43160	EREBP-like factor
CL12326.Contig2_All	0.3276	0.1028	0	0	0	0	2.9324	2.7142	0	0	58.9	4e-08	PREDICTED: ethylene-responsive transcription factor SHINE 2-like [Glycine max] >gi|947104062|gb|KRH52445.1| hypothetical protein GLYMA_06G068800 [Glycine max] >gi|947104063|gb|KRH52446.1| hypothetical protein GLYMA_06G068800 [Glycine max]	gi|571459263|ref|XM_003526361.2|	155	1e-34	PREDICTED: Glycine max ethylene-responsive transcription factor SHINE 2-like (LOC100794649), mRNA	Q9LFN7	173	1e-52	SHN2_ARATH Ethylene-responsive transcription factor SHINE 2 OS=Arabidopsis thaliana GN=SHN2 PE=2 SV=1	--	--	--	--	--	K09286	5e-09	58.2	sbi:SORBI_02g006023	EREBP-like factor
CL12326.Contig3_All	5.1511	2.8832	1.1707	0.6867	0	0	1.3773	0.7909	0.494	1.3219	60.8	1e-08	unknown [Lotus japonicus]	gi|502132370|ref|XM_004501270.1|	159	1e-35	PREDICTED: Cicer arietinum ethylene-responsive transcription factor SHINE 2-like (LOC101495239), mRNA	Q3E958	171	5e-51	SHN3_ARATH Ethylene-responsive transcription factor SHINE 3 OS=Arabidopsis thaliana GN=SHN3 PE=2 SV=1	--	--	--	--	--	K09286	7e-10	60.8	vvi:100265914	EREBP-like factor
CL12326.Contig4_All	35.8029	23.7011	4.2874	3.8189	0.0699	0.1402	2.4909	0.8582	5.4502	11.1378	285.8	8e-94	unknown [Lotus japonicus]	gi|571449459|ref|XM_003522569.2|	270	4e-69	PREDICTED: Glycine max ethylene-responsive transcription factor SHINE 2-like (LOC100806821), mRNA	Q3E958	224	5e-72	SHN3_ARATH Ethylene-responsive transcription factor SHINE 3 OS=Arabidopsis thaliana GN=SHN3 PE=2 SV=1	--	--	--	--	--	K09286	5e-21	91.3	ath:AT1G43160	EREBP-like factor
CL12341.Contig1_All	0.8767	0	0.3584	0.2403	0	0.226	5.5072	5.9494	0.1728	0.7073	535.8	0	hypothetical protein GLYMA_17G093600 [Glycine max]	gi|571535128|ref|XR_419048.1|	311	2e-81	PREDICTED: Glycine max E2F transcription factor-like E2FE-like (LOC100795252), transcript variant X2, misc_RNA	Q8LSZ4	371	2e-123	E2FE_ARATH E2F transcription factor-like E2FE OS=Arabidopsis thaliana GN=E2FE PE=2 SV=1	--	--	--	--	--	K09391	0	533	gmx:100806151	E2F transcription factor 7/8
CL12341.Contig2_All	2.0264	0.5087	0.6923	0.8746	0.3283	0.4231	9.0691	9.5934	0.3595	0.8489	588.6	0	PREDICTED: E2F transcription factor-like E2FE [Glycine max] >gi|955319474|ref|XP_014630922.1| PREDICTED: E2F transcription factor-like E2FE [Glycine max] >gi|955319476|ref|XP_014630923.1| PREDICTED: E2F transcription factor-like E2FE [Glycine max] >gi|955319479|ref|XP_014630924.1| PREDICTED: E2F transcription factor-like E2FE [Glycine max] >gi|947108687|gb|KRH57013.1| hypothetical protein GLYMA_0…	gi|571535126|ref|XM_003549595.2|	434	1e-118	PREDICTED: Glycine max E2F transcription factor-like E2FE-like (LOC100795252), transcript variant X1, mRNA	Q8LSZ4	410	7e-139	E2FE_ARATH E2F transcription factor-like E2FE OS=Arabidopsis thaliana GN=E2FE PE=2 SV=1	--	--	--	--	--	K09391	0	588	gmx:100806151	E2F transcription factor 7/8
CL12353.Contig1_All	0	0	0.1209	0.7801	2.5021	2.5083	0	0	0.1361	0	224.6	4e-69	hypothetical protein LR48_Vigan09g014700 [Vigna angularis] >gi|965662158|dbj|BAT77867.1| hypothetical protein VIGAN_02047100 [Vigna angularis var. angularis]	gi|597954844|emb|HG965100.1|	232	1e-57	Glycine max mRNA for transcription factor DREB2 protein (DREB2 gene), cultivar BacGiang (BG)	Q8LC30	162	2e-47	RAP21_ARATH Ethylene-responsive transcription factor RAP2-1 OS=Arabidopsis thaliana GN=RAP2-1 PE=2 SV=1	--	--	--	--	--	K09286	2e-57	190	rcu:RCOM_1589590	EREBP-like factor
CL12353.Contig2_All	0	0.1424	1.2523	2.3086	9.3478	9.1603	0	0	0.3355	0.3169	230.3	3e-71	ethylene-responsive transcription factor RAP2 [Phaseolus vulgaris]	gi|597954844|emb|HG965100.1|	226	7e-56	Glycine max mRNA for transcription factor DREB2 protein (DREB2 gene), cultivar BacGiang (BG)	Q8LC30	159	2e-46	RAP21_ARATH Ethylene-responsive transcription factor RAP2-1 OS=Arabidopsis thaliana GN=RAP2-1 PE=2 SV=1	--	--	--	--	--	K09286	8e-60	196	rcu:RCOM_1589590	EREBP-like factor
CL1237.Contig5_All	55.0329	0.3279	0.9153	10.9526	1.0479	14.3026	5.8252	6.6784	0.103	1.07	410.2	2e-143	hypothetical protein PHAVU_005G000900g [Phaseolus vulgaris] >gi|593696249|ref|XP_007148610.1| hypothetical protein PHAVU_005G000900g [Phaseolus vulgaris] >gi|593696252|ref|XP_007148611.1| hypothetical protein PHAVU_005G000900g [Phaseolus vulgaris] >gi|951063393|ref|XP_014523267.1| PREDICTED: agamous-like MADS-box protein AGL11 [Vigna radiata var. radiata] >gi|561021873|gb|ESW20603.1| hypothetical…	gi|571457842|ref|XM_006580849.1|	710	0	PREDICTED: Glycine max MADS domain transporter AGL11 (AGL11), transcript variant X1, mRNA	Q38836	333	4e-115	AGL11_ARATH Agamous-like MADS-box protein AGL11 OS=Arabidopsis thaliana GN=AGL11 PE=1 SV=1	YPL089c	76.3	2e-14	COG5068	Regulator of arginine metabolism and related MADS box-containing transcription factors	K09264	1e-96	287	vvi:100232864	MADS-box transcription factor, plant
CL12382.Contig4_All	124.195	201.386	106.959	149.882	126.17	102.043	40.9145	41.0175	149.488	147.846	208	2e-62	hypothetical protein LR48_Vigan03g278800 [Vigna angularis] >gi|965671647|dbj|BAT86254.1| hypothetical protein VIGAN_04388900 [Vigna angularis var. angularis]	gi|502112719|ref|XM_004494365.1|	129	1e-26	PREDICTED: Cicer arietinum ocs element-binding factor 1-like (LOC101500317), mRNA	Q9LZP8	157	3e-45	BZP53_ARATH bZIP transcription factor 53 OS=Arabidopsis thaliana GN=BZIP53 PE=1 SV=1	--	--	--	--	--	K04371	3e-23	105	vvi:100254083	extracellular signal-regulated kinase 1/2 [EC:2.7.11.24]
CL12523.Contig3_All	117.82	116.482	83.2878	174.071	4.6521	16.5816	25.3064	20.7783	101.521	130.305	344	4e-114	Agamous-like MADS-box protein AGL8 like [Glycine soja]	gi|571450736|ref|XM_006578457.1|	434	1e-118	PREDICTED: Glycine max agamous-like MADS-box protein AGL8 homolog (LOC100784742), transcript variant X2, mRNA	Q42429	291	1e-95	AGL8_SOLTU Agamous-like MADS-box protein AGL8 homolog OS=Solanum tuberosum PE=2 SV=1	YMR043w	65.5	4e-11	COG5068	Regulator of arginine metabolism and related MADS box-containing transcription factors	K09264	4e-115	342	gmx:100816836	MADS-box transcription factor, plant
CL12523.Contig4_All	6.8106	6.8236	6.3426	13.408	0.7189	2.9937	1.9701	1.6404	5.3708	8.4756	289.7	1e-93	PREDICTED: truncated transcription factor CAULIFLOWER A [Cicer arietinum]	gi|571450736|ref|XM_006578457.1|	371	2e-99	PREDICTED: Glycine max agamous-like MADS-box protein AGL8 homolog (LOC100784742), transcript variant X2, mRNA	Q40170	267	5e-87	AGL8_SOLLC Agamous-like MADS-box protein AGL8 homolog OS=Solanum lycopersicum GN=TDR4 PE=2 SV=1	YMR043w	64.7	7e-11	COG5068	Regulator of arginine metabolism and related MADS box-containing transcription factors	K09264	2e-92	283	gmx:100816836	MADS-box transcription factor, plant
CL12523.Contig5_All	14.258	15.5772	10.8612	21.1412	1.3893	4.2318	4.1335	2.6782	12.4956	13.5415	59.7	4e-70	PREDICTED: truncated transcription factor CAULIFLOWER A isoform X2 [Prunus mume]	gi|571458125|ref|XM_006580988.1|	268	2e-68	PREDICTED: Glycine max agamous-like MADS-box protein AGL8 homolog (AP1A), transcript variant X1, mRNA	Q42429	147	2e-59	AGL8_SOLTU Agamous-like MADS-box protein AGL8 homolog OS=Solanum tuberosum PE=2 SV=1	YMR043w	64.7	8e-11	COG5068	Regulator of arginine metabolism and related MADS box-containing transcription factors	K09264	8e-68	151	pop:POPTR_661810	MADS-box transcription factor, plant
CL12535.Contig4_All	0.73	0.6597	0.3069	0.2521	0.3244	0.271	1.8434	1.5759	0.3109	0.1957	125.6	7e-27	hypothetical protein VITISV_001841 [Vitis vinifera]	gi|571473217|ref|XM_003531891.2|	559	1e-156	PREDICTED: Glycine max transcription factor GTE1-like (LOC100818490), mRNA	Q9FT54	266	5e-80	GTE6_ARATH Transcription factor GTE6 OS=Arabidopsis thaliana GN=GTE6 PE=2 SV=1	YDL070w	74.7	6e-13	COG5076	Transcription factor involved in chromatin remodeling, contains bromodomain	K11684	1e-23	107	sbi:SORBI_03g001920	bromodomain-containing factor 1
CL12571.Contig1_All	2.2163	5.7271	8.2222	21.3816	0.4224	2.2381	0.4913	0.3086	8.7901	4.2962	522.7	0	PREDICTED: uncharacterized protein LOC100786711 [Glycine max] >gi|947069556|gb|KRH18447.1| hypothetical protein GLYMA_13G060600 [Glycine max]	gi|571549284|ref|XM_003552496.2|	262	1e-66	PREDICTED: Glycine max ethylene-responsive transcription factor CRF5-like (LOC100796159), mRNA	Q6J9S1	119	2e-30	RA211_ARATH Ethylene-responsive transcription factor RAP2-11 OS=Arabidopsis thaliana GN=RAP2-11 PE=2 SV=1	--	--	--	--	--	K09286	1e-67	222	osa:4352648	EREBP-like factor
CL12655.Contig2_All	0.1886	0.3157	0	0	0	0	0.6517	1.0716	0	0.0702	495.4	7e-173	PREDICTED: transcription factor bHLH30 [Vitis vinifera] >gi|731370657|ref|XP_010647981.1| PREDICTED: transcription factor bHLH30 [Vitis vinifera]	gi|359807310|ref|NM_001254190.1|	367	3e-98	Glycine max transcription factor bHLH30-like (LOC100785826), mRNA	Q9S7Y1	354	2e-119	BH030_ARATH Transcription factor bHLH30 OS=Arabidopsis thaliana GN=BHLH30 PE=1 SV=1	--	--	--	--	--	K13422	6e-08	56.6	vvi:100250607	transcription factor MYC2
CL12684.Contig1_All	7.7257	7.5824	5.6785	8.9538	26.5633	21.2383	7.0056	6.8201	5.0846	4.2827	104.8	8e-23	unknown [Lotus japonicus]	gi|502169951|ref|XM_004514666.1|	89.7	1e-14	PREDICTED: Cicer arietinum bZIP transcription factor 60-like (LOC101495099), mRNA	--	--	--	--	--	--	--	--	--	--	--	--	--	--
CL12684.Contig2_All	83.1213	59.5653	52.7054	55.909	115.189	96.795	53.8973	50.1506	51.7092	44.2573	265.8	1e-84	bZIP transcription factor bZIP68 [Glycine max] >gi|113367186|gb|ABI34650.1| bZIP transcription factor bZIP68 [Glycine max] >gi|734418141|gb|KHN39392.1| bZIP transcription factor 60 [Glycine soja]	gi|502169951|ref|XM_004514666.1|	276	6e-71	PREDICTED: Cicer arietinum bZIP transcription factor 60-like (LOC101495099), mRNA	Q9C7S0	140	2e-38	BZP60_ARATH bZIP transcription factor 60 OS=Arabidopsis thaliana GN=BZIP60 PE=1 SV=1	--	--	--	--	--	--	--	--	--	--
CL12709.Contig5_All	53.8819	48.8756	57.7866	75.7522	19.8549	13.8167	26.6348	31.8923	99.4527	61.8771	255.4	1e-80	orf [Ricinus communis]	gi|359493777|ref|XM_003634619.1|	256	8e-65	PREDICTED: Vitis vinifera multiprotein-bridging factor 1a-like (LOC100854999), mRNA	Q9LXT3	238	6e-76	MBF1B_ARATH Multiprotein-bridging factor 1b OS=Arabidopsis thaliana GN=MBF1B PE=2 SV=1	SPBC83.17	96.7	6e-23	COG1813	Predicted transcription factor, homolog of eukaryotic MBF1	K03627	3e-79	247	pop:POPTR_834089	putative transcription factor
CL12730.Contig1_All	5.3347	0	0.0807	0.0473	0.0355	0.2849	0.5424	0.6904	0	0	738	0	hypothetical protein PHAVU_002G146400g [Phaseolus vulgaris] >gi|561031776|gb|ESW30355.1| hypothetical protein PHAVU_002G146400g [Phaseolus vulgaris]	gi|571433758|ref|XM_003517303.2|	543	1e-151	PREDICTED: Glycine max AP2-like ethylene-responsive transcription factor AIL6-like (LOC100777168), mRNA	Q52QU2	600	0	AIL6_ARATH AP2-like ethylene-responsive transcription factor AIL6 OS=Arabidopsis thaliana GN=AIL6 PE=2 SV=1	--	--	--	--	--	K09285	0	730	gmx:100777168	AP2-like factor, ANT lineage
CL12730.Contig2_All	3.4996	0	0	0	0	0.0451	0.6412	1.1045	0	0	760.8	0	hypothetical protein PHAVU_002G146400g [Phaseolus vulgaris] >gi|561031776|gb|ESW30355.1| hypothetical protein PHAVU_002G146400g [Phaseolus vulgaris]	gi|571433758|ref|XM_003517303.2|	638	1e-180	PREDICTED: Glycine max AP2-like ethylene-responsive transcription factor AIL6-like (LOC100777168), mRNA	Q52QU2	600	0	AIL6_ARATH AP2-like ethylene-responsive transcription factor AIL6 OS=Arabidopsis thaliana GN=AIL6 PE=2 SV=1	--	--	--	--	--	K09285	0	742	gmx:100777168	AP2-like factor, ANT lineage
CL12788.Contig11_All	0	0.7115	3.0785	1.864	0	0.0292	0	0.0298	0.5215	2.1811	349.7	1e-111	transcription factor bHLH35-like [Glycine max] >gi|734411204|gb|KHN35816.1| Transcription factor bHLH35 [Glycine soja] >gi|918463881|gb|ALA09285.1| bHLH transcription factor, partial [Glycine max]	gi|403044480|ref|NM_001253022.2|	278	4e-71	Glycine max transcription factor bHLH35-like (LOC100817978), mRNA	Q2HIV9	226	1e-67	BH035_ARATH Transcription factor bHLH35 OS=Arabidopsis thaliana GN=BHLH35 PE=2 SV=1	--	--	--	--	--	K13422	9e-10	63.9	mtr:MTR_8g067280	transcription factor MYC2
CL12788.Contig12_All	0	0.1381	0.2024	0.0339	0	0	0	0	0.2603	0.5532	110.5	1e-24	transcription factor bHLH35-like [Glycine max] >gi|734411204|gb|KHN35816.1| Transcription factor bHLH35 [Glycine soja] >gi|918463881|gb|ALA09285.1| bHLH transcription factor, partial [Glycine max]	gi|571475615|ref|XM_006586651.1|	250	1e-62	PREDICTED: Glycine max transcription factor bHLH35-like (LOC100817978), transcript variant X1, mRNA	Q2HIV9	142	9e-38	BH035_ARATH Transcription factor bHLH35 OS=Arabidopsis thaliana GN=BHLH35 PE=2 SV=1	--	--	--	--	--	K13422	2e-07	56.6	ppp:PHYPADRAFT_164647	transcription factor MYC2
CL12788.Contig13_All	0.135	1.1865	2.3422	3.9134	0	0.1253	0.1909	0	0.3994	2.7154	367.9	9e-125	transcription factor bHLH35-like [Glycine max] >gi|734411204|gb|KHN35816.1| Transcription factor bHLH35 [Glycine soja] >gi|918463881|gb|ALA09285.1| bHLH transcription factor, partial [Glycine max]	gi|403044480|ref|NM_001253022.2|	515	1e-143	Glycine max transcription factor bHLH35-like (LOC100817978), mRNA	Q2HIV9	248	8e-80	BH035_ARATH Transcription factor bHLH35 OS=Arabidopsis thaliana GN=BHLH35 PE=2 SV=1	--	--	--	--	--	K13422	7e-16	81.6	ppp:PHYPADRAFT_164647	transcription factor MYC2
CL12788.Contig14_All	0	0.83	2.4328	0.8834	0	0	0	0	0.9126	2.3392	150.2	1e-39	transcription factor bHLH35-like [Glycine max] >gi|734411204|gb|KHN35816.1| Transcription factor bHLH35 [Glycine soja] >gi|918463881|gb|ALA09285.1| bHLH transcription factor, partial [Glycine max]	gi|571475615|ref|XM_006586651.1|	367	3e-98	PREDICTED: Glycine max transcription factor bHLH35-like (LOC100817978), transcript variant X1, mRNA	Q2HIV9	159	6e-45	BH035_ARATH Transcription factor bHLH35 OS=Arabidopsis thaliana GN=BHLH35 PE=2 SV=1	--	--	--	--	--	K13422	4e-13	73.6	ppp:PHYPADRAFT_164647	transcription factor MYC2
CL12788.Contig2_All	0.0703	0.5954	1.2926	0.7582	0.0651	0	0	0.0166	0.5819	1.3541	55.5	9e-06	PREDICTED: transcription factor bHLH35-like [Pyrus x bretschneideri]	gi|571475615|ref|XM_006586651.1|	367	9e-98	PREDICTED: Glycine max transcription factor bHLH35-like (LOC100817978), transcript variant X1, mRNA	Q2HIV9	156	2e-42	BH035_ARATH Transcription factor bHLH35 OS=Arabidopsis thaliana GN=BHLH35 PE=2 SV=1	--	--	--	--	--	K13422	1e-11	71.2	ppp:PHYPADRAFT_164647	transcription factor MYC2
CL12788.Contig3_All	0.1233	0.7739	2.4628	1.5207	0.0571	0	0.2905	0.1751	0.5835	1.5842	346.7	7e-116	transcription factor bHLH35-like [Glycine max] >gi|734411204|gb|KHN35816.1| Transcription factor bHLH35 [Glycine soja] >gi|918463881|gb|ALA09285.1| bHLH transcription factor, partial [Glycine max]	gi|403044480|ref|NM_001253022.2|	210	4e-51	Glycine max transcription factor bHLH35-like (LOC100817978), mRNA	Q2HIV9	249	9e-80	BH035_ARATH Transcription factor bHLH35 OS=Arabidopsis thaliana GN=BHLH35 PE=2 SV=1	--	--	--	--	--	K13422	6e-16	82	mtr:MTR_8g067280	transcription factor MYC2
CL12788.Contig4_All	0	0.7292	2.0611	2.0597	0	0.2022	0	0.0688	0.1718	0.8924	408.3	3e-141	PREDICTED: transcription factor bHLH35-like [Pyrus x bretschneideri]	gi|403044480|ref|NM_001253022.2|	591	1e-166	Glycine max transcription factor bHLH35-like (LOC100817978), mRNA	Q2HIV9	275	6e-91	BH035_ARATH Transcription factor bHLH35 OS=Arabidopsis thaliana GN=BHLH35 PE=2 SV=1	--	--	--	--	--	K13422	7e-16	81.3	ppp:PHYPADRAFT_164647	transcription factor MYC2
CL12788.Contig5_All	0	1.8636	2.6098	1.7409	0.0225	0.0226	0	0	1.0365	3.0454	366.7	7e-116	transcription factor bHLH35-like [Glycine max] >gi|734411204|gb|KHN35816.1| Transcription factor bHLH35 [Glycine soja] >gi|918463881|gb|ALA09285.1| bHLH transcription factor, partial [Glycine max]	gi|403044480|ref|NM_001253022.2|	515	1e-142	Glycine max transcription factor bHLH35-like (LOC100817978), mRNA	Q2HIV9	243	4e-73	BH035_ARATH Transcription factor bHLH35 OS=Arabidopsis thaliana GN=BHLH35 PE=2 SV=1	--	--	--	--	--	K13422	7e-15	80.9	mtr:MTR_8g067280	transcription factor MYC2
CL12788.Contig6_All	3.804	6.3659	7.6834	6.9902	5.0058	2.4918	0.7379	0.9534	3.2203	4.7493	374	2e-122	transcription factor bHLH35-like [Glycine max] >gi|734411204|gb|KHN35816.1| Transcription factor bHLH35 [Glycine soja] >gi|918463881|gb|ALA09285.1| bHLH transcription factor, partial [Glycine max]	gi|571559819|ref|XM_003554541.2|	270	8e-69	PREDICTED: Glycine max cathepsin B-like (LOC100788988), mRNA	Q2HIV9	276	4e-87	BH035_ARATH Transcription factor bHLH35 OS=Arabidopsis thaliana GN=BHLH35 PE=2 SV=1	--	--	--	--	--	K01363	3e-51	184	gmx:100788988	cathepsin B [EC:3.4.22.1]
CL12788.Contig7_All	0.0442	1.9993	2.7907	1.1458	0	0.0821	0	0.0838	1.0468	3.4106	346.7	2e-113	transcription factor bHLH35-like [Glycine max] >gi|734411204|gb|KHN35816.1| Transcription factor bHLH35 [Glycine soja] >gi|918463881|gb|ALA09285.1| bHLH transcription factor, partial [Glycine max]	gi|403044480|ref|NM_001253022.2|	210	5e-51	Glycine max transcription factor bHLH35-like (LOC100817978), mRNA	Q2HIV9	249	1e-77	BH035_ARATH Transcription factor bHLH35 OS=Arabidopsis thaliana GN=BHLH35 PE=2 SV=1	--	--	--	--	--	K13422	1e-15	82	mtr:MTR_8g067280	transcription factor MYC2
CL12788.Contig8_All	0.037	1.3913	3.5344	1.8909	0	0.0857	0	0.0175	1.5298	3.4879	349.7	4e-108	transcription factor bHLH35-like [Glycine max] >gi|734411204|gb|KHN35816.1| Transcription factor bHLH35 [Glycine soja] >gi|918463881|gb|ALA09285.1| bHLH transcription factor, partial [Glycine max]	gi|403044480|ref|NM_001253022.2|	270	2e-68	Glycine max transcription factor bHLH35-like (LOC100817978), mRNA	Q2HIV9	226	5e-67	BH035_ARATH Transcription factor bHLH35 OS=Arabidopsis thaliana GN=BHLH35 PE=2 SV=1	--	--	--	--	--	K13422	2e-09	63.9	mtr:MTR_8g067280	transcription factor MYC2
CL12788.Contig9_All	0.132	1.7991	2.7755	2.256	0.0349	0.035	0	0	1.1601	3.4131	366.7	3e-114	transcription factor bHLH35-like [Glycine max] >gi|734411204|gb|KHN35816.1| Transcription factor bHLH35 [Glycine soja] >gi|918463881|gb|ALA09285.1| bHLH transcription factor, partial [Glycine max]	gi|403044480|ref|NM_001253022.2|	515	1e-142	Glycine max transcription factor bHLH35-like (LOC100817978), mRNA	Q2HIV9	243	7e-73	BH035_ARATH Transcription factor bHLH35 OS=Arabidopsis thaliana GN=BHLH35 PE=2 SV=1	--	--	--	--	--	K13422	1e-14	80.9	mtr:MTR_8g067280	transcription factor MYC2
CL12906.Contig2_All	5.8161	2.993	4.035	3.3709	0.0538	0	5.206	5.2867	7.843	7.1468	519.6	0	hypothetical protein PHAVU_003G176800g [Phaseolus vulgaris] >gi|561028493|gb|ESW27133.1| hypothetical protein PHAVU_003G176800g [Phaseolus vulgaris]	gi|571454253|ref|XM_003524467.2|	640	1e-180	PREDICTED: Glycine max transcription factor DIVARICATA-like (LOC100812196), mRNA	Q8S9H7	199	2e-59	DIV_ANTMA Transcription factor DIVARICATA OS=Antirrhinum majus GN=DIVARICATA PE=2 SV=1	--	--	--	--	--	--	--	--	--	--
CL12906.Contig3_All	1.0769	0.6436	0.8085	0.5691	0	0	1.691	1.8936	0.8492	1.1457	234.6	3e-70	Transcription factor MYB1R1 [Glycine soja] >gi|918463765|gb|ALA09227.1| MYB/HD-like transcription factor, partial [Glycine max]	gi|189162406|dbj|AP009629.1|	392	1e-106	Lotus japonicus genomic DNA, chromosome 4, clone: LjB15O07, BM1698, complete sequence	Q8S9H7	104	1e-24	DIV_ANTMA Transcription factor DIVARICATA OS=Antirrhinum majus GN=DIVARICATA PE=2 SV=1	--	--	--	--	--	--	--	--	--	--
CL12935.Contig3_All	0.2555	0.7056	0.5372	2.1428	0	0	5.2007	4.5004	0.8464	0.9135	556.6	0	Basic helix-loop-helix DNA-binding superfamily protein isoform 1 [Theobroma cacao] >gi|508704440|gb|EOX96336.1| Basic helix-loop-helix DNA-binding superfamily protein isoform 1 [Theobroma cacao]	gi|571488816|ref|XM_006590976.1|	313	4e-82	PREDICTED: Glycine max transcription factor UNE10-like (LOC100787929), mRNA	Q8GZ38	360	1e-119	UNE10_ARATH Transcription factor UNE10 OS=Arabidopsis thaliana GN=UNE10 PE=2 SV=1	CC0303	54.7	3e-07	COG1230	Co/Zn/Cd efflux system component	K12126	5e-24	107	aly:ARALYDRAFT_471048	phytochrome-interacting factor 3
CL12935.Contig6_All	0.7756	0.6693	0.3057	1.3152	0	0.045	2.1925	2.0656	0.2867	0.5957	622.1	0	PREDICTED: transcription factor UNE10-like [Glycine max] >gi|947127447|gb|KRH75301.1| hypothetical protein GLYMA_01G076900 [Glycine max]	gi|571488816|ref|XM_006590976.1|	313	4e-82	PREDICTED: Glycine max transcription factor UNE10-like (LOC100787929), mRNA	Q8GZ38	392	9e-132	UNE10_ARATH Transcription factor UNE10 OS=Arabidopsis thaliana GN=UNE10 PE=2 SV=1	CC0303	54.7	3e-07	COG1230	Co/Zn/Cd efflux system component	K12126	2e-24	108	ath:AT1G09530	phytochrome-interacting factor 3
CL13001.Contig1_All	6.1535	5.2777	0.1617	0	0	0	28.0229	24.7621	0.9099	1.6612	638.6	0	hypothetical protein PHAVU_003G144500g [Phaseolus vulgaris] >gi|561028104|gb|ESW26744.1| hypothetical protein PHAVU_003G144500g [Phaseolus vulgaris]	gi|571496168|ref|XM_003541424.2|	589	1e-165	PREDICTED: Glycine max AP2-like ethylene-responsive transcription factor AIL5-like (LOC100797828), mRNA	Q6PQQ3	483	2e-165	AIL5_ARATH AP2-like ethylene-responsive transcription factor AIL5 OS=Arabidopsis thaliana GN=AIL5 PE=2 SV=2	--	--	--	--	--	K09285	0	638	gmx:100803558	AP2-like factor, ANT lineage
CL13001.Contig2_All	2.0823	3.6499	0	0	0	0.0333	8.186	7.3085	0.4671	0.5615	64.7	1e-08	hypothetical protein PHAVU_003G144500g [Phaseolus vulgaris] >gi|561028104|gb|ESW26744.1| hypothetical protein PHAVU_003G144500g [Phaseolus vulgaris]	gi|571496168|ref|XM_003541424.2|	551	1e-153	PREDICTED: Glycine max AP2-like ethylene-responsive transcription factor AIL5-like (LOC100797828), mRNA	Q6PQQ3	317	6e-98	AIL5_ARATH AP2-like ethylene-responsive transcription factor AIL5 OS=Arabidopsis thaliana GN=AIL5 PE=2 SV=2	--	--	--	--	--	K09285	6e-162	483	gmx:100797828	AP2-like factor, ANT lineage
CL13001.Contig3_All	3.1813	3.5554	0.0916	0.0537	0	0.0404	5.9539	6.3133	0.7217	0.7789	703.7	0	hypothetical protein PHAVU_003G144500g [Phaseolus vulgaris] >gi|561028104|gb|ESW26744.1| hypothetical protein PHAVU_003G144500g [Phaseolus vulgaris]	gi|571496168|ref|XM_003541424.2|	712	0	PREDICTED: Glycine max AP2-like ethylene-responsive transcription factor AIL5-like (LOC100797828), mRNA	Q6PQQ3	484	2e-164	AIL5_ARATH AP2-like ethylene-responsive transcription factor AIL5 OS=Arabidopsis thaliana GN=AIL5 PE=2 SV=2	--	--	--	--	--	K09285	0	695	gmx:100797828	AP2-like factor, ANT lineage
CL13001.Contig5_All	0.4409	0.2583	0.0618	0	0	0	1.0248	1.67	0.0695	0.2299	988	0	PREDICTED: AP2-like ethylene-responsive transcription factor ANT [Vigna radiata var. radiata]	gi|571508515|ref|XR_417921.1|	688	0	PREDICTED: Glycine max AP2-like ethylene-responsive transcription factor ANT-like (LOC100808138), misc_RNA	Q38914	466	3e-153	ANT_ARATH AP2-like ethylene-responsive transcription factor ANT OS=Arabidopsis thaliana GN=ANT PE=1 SV=2	--	--	--	--	--	K09285	0	928	gmx:100798179	AP2-like factor, ANT lineage
CL13001.Contig6_All	4.3091	2.9002	0.3939	0.077	0.0289	0	18.1526	21.2872	2.8071	2.651	907.5	0	PREDICTED: AP2-like ethylene-responsive transcription factor ANT [Vigna radiata var. radiata]	gi|571508515|ref|XR_417921.1|	706	0	PREDICTED: Glycine max AP2-like ethylene-responsive transcription factor ANT-like (LOC100808138), misc_RNA	Q38914	477	4e-158	ANT_ARATH AP2-like ethylene-responsive transcription factor ANT OS=Arabidopsis thaliana GN=ANT PE=1 SV=2	--	--	--	--	--	K09285	0	854	vvi:100252316	AP2-like factor, ANT lineage
CL13003.Contig3_All	9.3284	8.0931	5.8489	2.5832	0.3333	1.0327	23.0372	15.9606	4.7235	4.607	1303.9	0	PREDICTED: homeobox-leucine zipper protein GLABRA 2 [Jatropha curcas] >gi|643729369|gb|KDP37249.1| hypothetical protein JCGZ_06305 [Jatropha curcas]	gi|571514822|ref|XM_003546375.2|	1604	0	PREDICTED: Glycine max homeobox-leucine zipper protein GLABRA 2-like (LOC100809926), mRNA	P46607	951	0	HGL2_ARATH Homeobox-leucine zipper protein GLABRA 2 OS=Arabidopsis thaliana GN=GL2 PE=2 SV=3	ECU06g0500	54.3	2e-08	COG5576	Homeodomain-containing transcription factor	K09338	0	951	ath:AT1G79840	homeobox-leucine zipper protein
CL13003.Contig4_All	16.6972	13.2449	8.2841	6.877	0.8656	1.5804	32.5971	25.169	6.7943	8.7665	1322.4	0	PREDICTED: homeobox-leucine zipper protein GLABRA 2 [Jatropha curcas] >gi|643729369|gb|KDP37249.1| hypothetical protein JCGZ_06305 [Jatropha curcas]	gi|571514822|ref|XM_003546375.2|	1901	0	PREDICTED: Glycine max homeobox-leucine zipper protein GLABRA 2-like (LOC100809926), mRNA	P46607	969	0	HGL2_ARATH Homeobox-leucine zipper protein GLABRA 2 OS=Arabidopsis thaliana GN=GL2 PE=2 SV=3	ECU06g0500	54.3	2e-08	COG5576	Homeodomain-containing transcription factor	K09338	0	969	ath:AT1G79840	homeobox-leucine zipper protein
CL13057.Contig2_All	5.6104	1.8328	0.0808	0.4739	0	0	0.1448	0	2.9091	1.7171	456.1	2e-159	Transcription factor PERIANTHIA [Morus notabilis] >gi|587906105|gb|EXB94201.1| Transcription factor PERIANTHIA [Morus notabilis]	gi|571566314|ref|XM_006605829.1|	624	1e-176	PREDICTED: Glycine max transcription factor PERIANTHIA-like (LOC100775280), mRNA	Q9SX27	415	3e-143	PAN_ARATH Transcription factor PERIANTHIA OS=Arabidopsis thaliana GN=PAN PE=1 SV=1	--	--	--	--	--	K14431	7e-159	451	vvi:100249239	transcription factor TGA
CL13076.Contig3_All	0.3512	0.3051	0.142	0.3331	0	0	0.9417	0.486	0.2556	0.1509	1259.6	0	hypothetical protein VIGAN_08076300 [Vigna angularis var. angularis]	gi|571484426|ref|XM_006589496.1|	1154	0	PREDICTED: Glycine max homeobox-leucine zipper protein ANTHOCYANINLESS 2-like (LOC100794400), transcript variant X4, mRNA	Q0WV12	912	0	ANL2_ARATH Homeobox-leucine zipper protein ANTHOCYANINLESS 2 OS=Arabidopsis thaliana GN=ANL2 PE=2 SV=1	YDR451c	52	4e-06	COG5576	Homeodomain-containing transcription factor	K09338	0	897	aly:ARALYDRAFT_324546	homeobox-leucine zipper protein
CL13076.Contig5_All	1.1729	0.5761	0.268	0.7232	0	0	1.3934	0.9898	0.2413	0.3133	1257.7	0	hypothetical protein VIGAN_08076300 [Vigna angularis var. angularis]	gi|571484426|ref|XM_006589496.1|	1061	0	PREDICTED: Glycine max homeobox-leucine zipper protein ANTHOCYANINLESS 2-like (LOC100794400), transcript variant X4, mRNA	Q0WV12	903	0	ANL2_ARATH Homeobox-leucine zipper protein ANTHOCYANINLESS 2 OS=Arabidopsis thaliana GN=ANL2 PE=2 SV=1	YDR451c	52.4	3e-06	COG5576	Homeodomain-containing transcription factor	K09338	0	885	aly:ARALYDRAFT_324546	homeobox-leucine zipper protein
CL13076.Contig6_All	0.6861	0.6151	0.103	0.8864	0	0	1.0159	1.0209	0.4251	0.3285	1241.5	0	hypothetical protein VIGAN_08076300 [Vigna angularis var. angularis]	gi|571484426|ref|XM_006589496.1|	1061	0	PREDICTED: Glycine max homeobox-leucine zipper protein ANTHOCYANINLESS 2-like (LOC100794400), transcript variant X4, mRNA	Q0WV12	903	0	ANL2_ARATH Homeobox-leucine zipper protein ANTHOCYANINLESS 2 OS=Arabidopsis thaliana GN=ANL2 PE=2 SV=1	YDR451c	52.4	3e-06	COG5576	Homeodomain-containing transcription factor	K09338	0	885	aly:ARALYDRAFT_324546	homeobox-leucine zipper protein
CL13086.Contig23_All	1.6505	2.4752	0.721	0.6344	0.3373	0.736	0.5251	0.548	1.0396	0.455	150.6	3e-38	hypothetical protein GLYMA_15G135100 [Glycine max]	gi|571476100|ref|XM_003533044.2|	293	9e-76	PREDICTED: Glycine max MYB transcription factor MYB55 (MYB55), transcript variant 2, mRNA	Q8VWK4	203	3e-58	TRB1_ARATH Telomere repeat-binding factor 1 OS=Arabidopsis thaliana GN=TRB1 PE=1 SV=1	--	--	--	--	--	K09422	1e-66	229	gmx:100780698	myb proto-oncogene protein, plant
CL13094.Contig2_All	1.9097	0	0	0	0	0	12.9952	14.4655	0	0	162.2	1e-48	Transcription factor bHLH135 [Glycine soja] >gi|734338074|gb|KHN08689.1| Transcription factor bHLH135 [Glycine soja]	gi|571438357|ref|XM_003518973.2|	363	2e-97	PREDICTED: Glycine max transcription factor bHLH135-like (LOC100804830), mRNA	Q8GW32	137	4e-41	PRE6_ARATH Transcription factor PRE6 OS=Arabidopsis thaliana GN=PRE6 PE=1 SV=1	--	--	--	--	--	--	--	--	--	--
CL13142.Contig1_All	0.1916	0.5411	0.0503	0.2363	0	0	6.2732	5.8959	0	0	80.9	4e-15	hypothetical protein CISIN_1g047269mg [Citrus sinensis]	gi|568832198|ref|XM_006470266.1|	109	1e-20	PREDICTED: Citrus sinensis transcription factor WER-like (LOC102617151), mRNA	Q9SEI0	134	4e-36	WER_ARATH Transcription factor WER OS=Arabidopsis thaliana GN=WER PE=1 SV=1	ECU11g1690	65.5	2e-11	COG5147	Myb superfamily proteins, including transcription factors and mRNA splicing factors	K09422	1e-36	137	vvi:100244963	myb proto-oncogene protein, plant
CL13142.Contig2_All	1.8121	1.9901	0.4762	0.419	0.1048	0	13.7654	13.4043	0	0.5061	224.2	1e-71	Myb domain protein 66, putative [Theobroma cacao] >gi|508708579|gb|EOY00476.1| Myb domain protein 66, putative [Theobroma cacao]	gi|359473179|ref|XM_003631208.1|	151	2e-33	PREDICTED: Vitis vinifera transcription factor WER-like (LOC100852592), mRNA	Q9SEI0	192	2e-61	WER_ARATH Transcription factor WER OS=Arabidopsis thaliana GN=WER PE=1 SV=1	ECU11g1690	97.1	8e-24	COG5147	Myb superfamily proteins, including transcription factors and mRNA splicing factors	K09422	2e-70	217	vvi:100244963	myb proto-oncogene protein, plant
CL13168.Contig1_All	31.0549	24.0363	5.5312	11.1693	2.0762	2.1614	40.6391	36.5919	6.6326	9.54	81.6	1e-15	hypothetical protein LR48_Vigan06g050700 [Vigna angularis]	gi|60100349|gb|AY770401.1|	434	1e-118	Lotus corniculatus var. japonicus MADS box protein AP3-like mRNA, complete cds	P23706	214	2e-68	DEFA_ANTMA Floral homeotic protein DEFICIENS OS=Antirrhinum majus GN=DEFA PE=1 SV=1	YBR182c	69.7	2e-12	COG5068	Regulator of arginine metabolism and related MADS box-containing transcription factors	K09264	1e-98	293	gmx:100784496	MADS-box transcription factor, plant
CL13168.Contig2_All	13.5591	11.9759	1.7948	6.4404	0.093	0.3728	13.4379	15.6913	2.2573	2.9171	99	5e-98	hypothetical protein PHAVU_002G112200g [Phaseolus vulgaris] >gi|561031369|gb|ESW29948.1| hypothetical protein PHAVU_002G112200g [Phaseolus vulgaris]	gi|60100349|gb|AY770401.1|	509	1e-141	Lotus corniculatus var. japonicus MADS box protein AP3-like mRNA, complete cds	P23706	140	9e-54	DEFA_ANTMA Floral homeotic protein DEFICIENS OS=Antirrhinum majus GN=DEFA PE=1 SV=1	YBR182c	57.8	9e-09	COG5068	Regulator of arginine metabolism and related MADS box-containing transcription factors	K09264	2e-95	270	gmx:100784496	MADS-box transcription factor, plant
CL13168.Contig4_All	0.9184	1.6138	0	0.5663	0.085	0	2.1634	2.0001	0.7605	0.7182	99	1e-92	hypothetical protein PHAVU_002G112200g [Phaseolus vulgaris] >gi|561031369|gb|ESW29948.1| hypothetical protein PHAVU_002G112200g [Phaseolus vulgaris]	gi|60100349|gb|AY770401.1|	337	2e-89	Lotus corniculatus var. japonicus MADS box protein AP3-like mRNA, complete cds	P23706	121	3e-48	DEFA_ANTMA Floral homeotic protein DEFICIENS OS=Antirrhinum majus GN=DEFA PE=1 SV=1	YBR182c	57.8	1e-08	COG5068	Regulator of arginine metabolism and related MADS box-containing transcription factors	K09264	5e-90	252	gmx:100784496	MADS-box transcription factor, plant
CL1320.Contig1_All	4.7407	19.2787	30.497	5.3783	0.1317	0	9.5142	8.8428	11.8884	35.3759	349.4	2e-113	ethylene response factor [Medicago truncatula] >gi|355491234|gb|AES72437.1| ethylene response factor [Medicago truncatula]	gi|225462702|ref|XM_002267364.1|	105	2e-19	PREDICTED: Vitis vinifera ethylene-responsive transcription factor CRF4-like (LOC100248494), mRNA	Q9SUE3	191	2e-55	CRF4_ARATH Ethylene-responsive transcription factor CRF4 OS=Arabidopsis thaliana GN=CRF4 PE=1 SV=2	--	--	--	--	--	K09286	5e-40	150	pop:POPTR_571923	EREBP-like factor
CL1320.Contig2_All	3.8098	7.6871	2.9908	3.687	0	0.1343	6.6339	7.0318	4.5065	7.8652	378.6	8e-125	ethylene response factor [Medicago truncatula] >gi|355491234|gb|AES72437.1| ethylene response factor [Medicago truncatula]	gi|332656411|gb|CP002687.1|	97.6	5e-17	Arabidopsis thaliana chromosome 4, complete genome	Q9FK12	204	6e-60	CRF3_ARATH Ethylene-responsive transcription factor CRF3 OS=Arabidopsis thaliana GN=CRF3 PE=1 SV=1	--	--	--	--	--	K09286	9e-40	148	vvi:100246641	EREBP-like factor
CL13216.Contig2_All	0.6689	3.358	5.3315	6.667	0.2064	1.3448	0.8403	0.475	4.2196	9.2773	406.4	5e-137	hypothetical protein PHAVU_008G058300g [Phaseolus vulgaris] >gi|561012914|gb|ESW11775.1| hypothetical protein PHAVU_008G058300g [Phaseolus vulgaris]	gi|292786889|dbj|AK338677.1|	184	2e-43	Lotus japonicus cDNA, clone: LjFL2-037-AA11, HTC	O04609	228	3e-70	WRK22_ARATH WRKY transcription factor 22 OS=Arabidopsis thaliana GN=WRKY22 PE=2 SV=1	--	--	--	--	--	K13425	6e-109	330	vvi:100256849	WRKY transcription factor 22
CL13218.Contig1_All	2.6799	1.8112	1.8419	2.4785	4.7707	3.4912	1.4567	1.3175	3.17	1.4968	686	0	PREDICTED: heat stress transcription factor A-1b-like isoform X2 [Cicer arietinum]	gi|571436722|ref|XM_006573786.1|	638	1e-180	PREDICTED: Glycine max heat stress transcription factor A-1b-like (LOC100793665), mRNA	O81821	469	4e-161	HFA1B_ARATH Heat stress transcription factor A-1b OS=Arabidopsis thaliana GN=HSFA1B PE=2 SV=2	YGL073w	106	3e-23	COG5169	Heat shock transcription factor	--	--	--	--	--
CL13224.Contig1_All	0.3533	3.1041	0	0	0	0	4.3276	3.7635	0.1045	0.7894	194.5	3e-58	Basic-leucine zipper transcription factor family protein, putative [Theobroma cacao] >gi|508698884|gb|EOX90780.1| Basic-leucine zipper transcription factor family protein, putative [Theobroma cacao]	gi|359496532|ref|XM_003635211.1|	85.7	1e-13	PREDICTED: Vitis vinifera protein FD-like (LOC100260902), mRNA	Q84JK2	152	1e-43	FD_ARATH Protein FD OS=Arabidopsis thaliana GN=FD PE=1 SV=1	--	--	--	--	--	K14432	4e-19	86.7	pop:POPTR_808328	ABA responsive element binding factor
CL13274.Contig1_All	0.1657	0	0	0.1022	0	0.0769	3.9034	3.7657	0	0	412.9	1e-142	Myb-related protein Pp2 [Glycine soja]	gi|571548366|ref|XM_003552334.2|	337	2e-89	PREDICTED: Glycine max transcription factor MYB3-like (LOC100800408), mRNA	Q50EX6	210	1e-65	ODO1_PETHY Protein ODORANT1 OS=Petunia hybrida GN=ODO1 PE=2 SV=1	ECU11g1690	107	7e-27	COG5147	Myb superfamily proteins, including transcription factors and mRNA splicing factors	K09422	3e-140	402	rcu:RCOM_1614750	myb proto-oncogene protein, plant
CL13280.Contig1_All	30.7512	22.5249	16.7737	13.7566	0.449	0.2251	14.5327	16.4412	29.1459	18.422	294.7	2e-92	hypothetical protein LR48_Vigan02g247900 [Vigna angularis] >gi|965607269|dbj|BAT93760.1| hypothetical protein VIGAN_08028900 [Vigna angularis var. angularis]	gi|571473203|ref|XM_006585790.1|	137	6e-29	PREDICTED: Glycine max ethylene-responsive transcription factor ERF118-like (LOC102667919), transcript variant X3, mRNA	Q9CA27	157	8e-43	EF118_ARATH Ethylene-responsive transcription factor ERF118 OS=Arabidopsis thaliana GN=ERF118 PE=2 SV=1	--	--	--	--	--	K09286	9e-27	111	vvi:100246641	EREBP-like factor
CL13280.Contig2_All	33.7147	18.2389	34.6307	49.5389	1.3523	0.8205	6.3388	6.9888	50.6578	27.9997	357.8	8e-115	PREDICTED: ethylene-responsive transcription factor ERF118 [Glycine max] >gi|955347568|ref|XP_014618907.1| PREDICTED: ethylene-responsive transcription factor ERF118 [Glycine max] >gi|947087236|gb|KRH35957.1| hypothetical protein GLYMA_10G274600 [Glycine max] >gi|947087237|gb|KRH35958.1| hypothetical protein GLYMA_10G274600 [Glycine max]	gi|189162640|dbj|AP009863.1|	129	2e-26	Lotus japonicus genomic DNA, chromosome 6, clone: LjT13N05, TM1862b, complete sequence	Q9CA27	175	8e-49	EF118_ARATH Ethylene-responsive transcription factor ERF118 OS=Arabidopsis thaliana GN=ERF118 PE=2 SV=1	--	--	--	--	--	K09286	9e-28	115	pop:POPTR_571923	EREBP-like factor
CL13280.Contig3_All	42.2057	23.8381	43.4479	56.2316	1.4863	0.9366	8.2559	9.5562	67.1809	35.8217	357.8	2e-116	PREDICTED: ethylene-responsive transcription factor ERF118 [Glycine max] >gi|955347568|ref|XP_014618907.1| PREDICTED: ethylene-responsive transcription factor ERF118 [Glycine max] >gi|947087236|gb|KRH35957.1| hypothetical protein GLYMA_10G274600 [Glycine max] >gi|947087237|gb|KRH35958.1| hypothetical protein GLYMA_10G274600 [Glycine max]	gi|189162640|dbj|AP009863.1|	133	9e-28	Lotus japonicus genomic DNA, chromosome 6, clone: LjT13N05, TM1862b, complete sequence	Q9CA27	175	2e-49	EF118_ARATH Ethylene-responsive transcription factor ERF118 OS=Arabidopsis thaliana GN=ERF118 PE=2 SV=1	--	--	--	--	--	K09286	6e-28	115	pop:POPTR_571923	EREBP-like factor
CL13353.Contig20_All	21.1949	19.4573	2.9385	5.6409	2.3996	2.3583	794.251	762.114	6.0123	15.2165	278.5	2e-88	PREDICTED: transcription factor bHLH148-like [Glycine max] >gi|947052925|gb|KRH02378.1| hypothetical protein GLYMA_17G035200 [Glycine max]	gi|571467625|ref|XM_003529469.2|	151	4e-33	PREDICTED: Glycine max transcription factor bHLH147-like (LOC100798919), mRNA	Q9LSN7	193	1e-57	BH147_ARATH Transcription factor bHLH147 OS=Arabidopsis thaliana GN=BHLH147 PE=1 SV=1	--	--	--	--	--	--	--	--	--	--
CL1340.Contig10_All	1.1156	0.9716	0.2393	0.0281	0	0.0211	1.9307	1.3581	0.1885	0.3306	62.4	1e-07	Myb-related protein B [Glycine soja]	gi|502093668|ref|XM_004489958.1|	866	0	PREDICTED: Cicer arietinum transcriptional activator Myb-like (LOC101508608), mRNA	P81391	94	2e-21	MYB05_ANTMA Myb-related protein 305 OS=Antirrhinum majus GN=MYB305 PE=2 SV=1	ECU11g1690	91.7	4e-20	COG5147	Myb superfamily proteins, including transcription factors and mRNA splicing factors	K09422	0	588	vvi:100246639	myb proto-oncogene protein, plant
CL1340.Contig4_All	1.1419	2.0543	0.2801	0.0469	0	0.106	1.7931	1.1172	0.045	0.2551	713	0	Myb-related protein B [Glycine soja]	gi|571438371|ref|XM_003519717.2|	892	0	PREDICTED: Glycine max pre-mRNA-splicing factor CEF1-like (LOC100807667), transcript variant X1, mRNA	Q9SPG9	92	7e-21	MYB24_ARATH Transcription factor MYB24 OS=Arabidopsis thaliana GN=MYB24 PE=1 SV=1	ECU11g1690	89.7	1e-19	COG5147	Myb superfamily proteins, including transcription factors and mRNA splicing factors	K09422	0	610	vvi:100246639	myb proto-oncogene protein, plant
CL13507.Contig1_All	1.0313	0.7551	6.1429	17.8044	9.6263	11.0856	0	0	1.4232	0.864	184.1	4e-55	hypothetical protein PHAVU_003G151300g [Phaseolus vulgaris] >gi|561028183|gb|ESW26823.1| hypothetical protein PHAVU_003G151300g [Phaseolus vulgaris]	gi|502150101|ref|XM_004507732.1|	121	2e-24	PREDICTED: Cicer arietinum transcription factor BEE 3-like (LOC101503985), mRNA	Q9C8Z9	50.4	4e-07	BH148_ARATH Transcription factor bHLH148 OS=Arabidopsis thaliana GN=BHLH148 PE=1 SV=1	--	--	--	--	--	--	--	--	--	--
CL13507.Contig3_All	7.282	4.748	6.9586	1.9825	1.1381	1.6674	0.3564	0.7164	3.0204	3.9089	204.5	2e-63	hypothetical protein POPTR_0018s10810g [Populus trichocarpa] >gi|222866529|gb|EEF03660.1| hypothetical protein POPTR_0018s10810g [Populus trichocarpa]	gi|571496243|ref|XM_006593497.1|	119	7e-24	PREDICTED: Glycine max transcription factor bHLH87-like (LOC100809722), transcript variant X2, mRNA	Q9SKX1	49.7	3e-07	IBH1_ARATH Transcription factor IBH1 OS=Arabidopsis thaliana GN=IBH1 PE=1 SV=1	--	--	--	--	--	--	--	--	--	--
CL1351.Contig3_All	1.8928	3.1499	2.1014	1.8096	0.3741	0.8486	3.7472	5.5579	2.6918	3.2073	63.5	1e-08	hypothetical protein LR48_Vigan08g202400 [Vigna angularis]	gi|571478805|ref|XM_003534314.2|	385	1e-103	PREDICTED: Glycine max probable basic-leucine zipper transcription factor Q-like (LOC100793492), mRNA	--	--	--	--	YBR112c	53.1	5e-06	COG0457	FOG: TPR repeat	--	--	--	--	--
CL13552.Contig1_All	37.9316	23.3037	17.0558	28.1436	348.767	205.718	6.0151	5.4402	24.3537	16.2241	113.2	5e-99	NAC transcription factors 35 [Manihot esculenta]	gi|351724342|ref|NM_001251149.1|	309	6e-81	Glycine max NAC domain protein (NAC14), mRNA >gi|187940282|gb|EU661914.1| Glycine max NAC domain protein (NAC14) mRNA, complete cds	Q9FY93	248	2e-78	NAC83_ARATH NAC domain-containing protein 83 OS=Arabidopsis thaliana GN=NAC083 PE=1 SV=1	--	--	--	--	--	--	--	--	--	--
CL13552.Contig2_All	141.8	106.27	80.6051	97.6021	1009.89	523.514	14.7159	19.3472	115.364	72.4125	375.2	1e-126	NAC transcription factors 35 [Manihot esculenta]	gi|351724342|ref|NM_001251149.1|	309	6e-81	Glycine max NAC domain protein (NAC14), mRNA >gi|187940282|gb|EU661914.1| Glycine max NAC domain protein (NAC14) mRNA, complete cds	Q9FY93	299	7e-99	NAC83_ARATH NAC domain-containing protein 83 OS=Arabidopsis thaliana GN=NAC083 PE=1 SV=1	--	--	--	--	--	--	--	--	--	--
CL13609.Contig1_All	2.6036	0.7379	0.1766	0	0	0	19.7042	17.6541	0	0.4691	172.2	8e-50	PREDICTED: chromatin accessibility complex protein 1 [Cucumis sativus] >gi|700192114|gb|KGN47318.1| hypothetical protein Csa_6G294440 [Cucumis sativus]	gi|502145321|ref|XM_004505924.1|	115	1e-22	PREDICTED: Cicer arietinum DNA polymerase epsilon subunit C-like (LOC101509858), mRNA	Q9FGP7	50.1	5e-07	NFYC6_ARATH Nuclear transcription factor Y subunit C-6 OS=Arabidopsis thaliana GN=NFYC6 PE=2 SV=1	--	--	--	--	--	--	--	--	--	--
CL13630.Contig2_All	1.4063	1.1541	1.0518	0.5669	0.1502	0.2008	1.5034	2.2534	0.9917	0.7553	81.3	1e-13	Trihelix transcription factor GT-2 [Glycine soja]	gi|571568008|ref|XM_003556104.2|	280	1e-71	PREDICTED: Glycine max trihelix transcription factor GT-2-like (LOC100817001), mRNA	Q39117	414	4e-132	TGT2_ARATH Trihelix transcription factor GT-2 OS=Arabidopsis thaliana GN=GT-2 PE=2 SV=1	Rv3876	56.6	3e-07	COG0455	ATPases involved in chromosome partitioning	K01115	2e-09	62.8	vcn:VOLCADRAFT_99471	phospholipase D [EC:3.1.4.4]
CL13681.Contig6_All	4.1264	10.2481	2.0303	4.9801	0.0813	0.1358	2.1508	2.1336	3.9464	4.2826	263.5	6e-80	hypothetical protein LR48_Vigan06g113900 [Vigna angularis]	gi|571439792|ref|XM_003518738.2|	448	1e-122	PREDICTED: Glycine max developmental protein SEPALLATA 1-like (LOC100811049), mRNA	Q39685	251	2e-76	CMB1_DIACA MADS-box protein CMB1 OS=Dianthus caryophyllus GN=CMB1 PE=2 SV=1	YPL089c	67	1e-10	COG5068	Regulator of arginine metabolism and related MADS box-containing transcription factors	K09264	2e-71	238	gmx:100785322	MADS-box transcription factor, plant
CL13681.Contig7_All	2.9265	6.9563	2.9673	5.0459	0.1438	0.2403	1.4397	2.1089	3.0022	4.0214	143.3	5e-37	hypothetical protein LR48_Vigan06g113900 [Vigna angularis]	gi|571439792|ref|XM_003518738.2|	208	3e-50	PREDICTED: Glycine max developmental protein SEPALLATA 1-like (LOC100811049), mRNA	Q39685	132	2e-34	CMB1_DIACA MADS-box protein CMB1 OS=Dianthus caryophyllus GN=CMB1 PE=2 SV=1	--	--	--	--	--	K09264	5e-32	127	gmx:100785322	MADS-box transcription factor, plant
CL13715.Contig1_All	8.8768	34.9719	12.9594	4.6623	0	0	0.5421	0.3891	11.9585	19.6486	315.5	1e-105	PREDICTED: transcriptional activator Myb-like [Cicer arietinum]	gi|225458514|ref|XM_002284201.1|	159	9e-36	PREDICTED: Vitis vinifera transcriptional activator Myb-like (LOC100250670), mRNA	Q9FDW1	188	6e-57	MYB44_ARATH Transcription factor MYB44 OS=Arabidopsis thaliana GN=MYB44 PE=2 SV=1	ECU11g1690	129	4e-35	COG5147	Myb superfamily proteins, including transcription factors and mRNA splicing factors	K09422	8e-59	196	sbi:SORBI_02g013010	myb proto-oncogene protein, plant
CL13715.Contig2_All	4.6151	13.6915	11.9955	1.7591	0.0777	0.1557	0.4744	0.4767	12.9034	14.904	315.5	1e-105	PREDICTED: transcriptional activator Myb-like [Cicer arietinum]	gi|225458514|ref|XM_002284201.1|	159	9e-36	PREDICTED: Vitis vinifera transcriptional activator Myb-like (LOC100250670), mRNA	Q9FDW1	188	5e-57	MYB44_ARATH Transcription factor MYB44 OS=Arabidopsis thaliana GN=MYB44 PE=2 SV=1	ECU11g1690	129	4e-35	COG5147	Myb superfamily proteins, including transcription factors and mRNA splicing factors	K09422	6e-59	196	sbi:SORBI_02g013010	myb proto-oncogene protein, plant
CL13730.Contig1_All	5.4464	12.9972	1.5442	2.4302	0.0663	0.0665	3.9162	3.5623	4.9166	4.3229	--	--	--	gi|571435011|ref|XM_006573292.1|	65.9	2e-07	PREDICTED: Glycine max transcription factor bHLH140-like (LOC100786762), mRNA	--	--	--	--	--	--	--	--	--	K10863	1e-06	53.5	gmx:100786762	aprataxin [EC:3.-.-.-]
CL13779.Contig1_All	0.9328	0.4789	0.2228	0.2614	1.5111	1.1607	0.9188	0.9836	0.9529	0.4499	79.7	1e-12	PREDICTED: uncharacterized protein LOC101490682 isoform X2 [Cicer arietinum]	gi|502163141|ref|XM_004512683.1|	801	0	PREDICTED: Cicer arietinum uncharacterized LOC101490682 (LOC101490682), transcript variant X2, mRNA	Q9S7G7	110	3e-24	MB3R1_ARATH Myb-related protein 3R-1 OS=Arabidopsis thaliana GN=MYB3R-1 PE=2 SV=1	YKR099w	78.6	7e-14	COG5147	Myb superfamily proteins, including transcription factors and mRNA splicing factors	K09422	0	632	vvi:100268025	myb proto-oncogene protein, plant
CL1382.Contig16_All	0.4779	1.4303	0.8501	1.0879	0.1021	0.1023	0.0693	0.0348	1.3045	2.1763	98.6	0	Transcription factor GTE12 [Glycine soja]	gi|571517213|ref|XM_003547142.2|	422	1e-115	PREDICTED: Glycine max transcription factor GTE12-like (LOC100800689), mRNA	Q9LS28	164	3e-43	GTE12_ARATH Transcription factor GTE12 OS=Arabidopsis thaliana GN=GTE12 PE=2 SV=2	YDL070w	91.7	2e-18	COG5076	Transcription factor involved in chromatin remodeling, contains bromodomain	K11684	2e-30	127	sbi:SORBI_03g001920	bromodomain-containing factor 1
CL1382.Contig17_All	2.8058	4.1289	4.3731	3.4003	0.3135	0.2245	0.7749	1.1909	7.9541	4.3232	118.6	1e-135	Transcription factor GTE12 [Glycine soja]	gi|571517213|ref|XM_003547142.2|	224	3e-55	PREDICTED: Glycine max transcription factor GTE12-like (LOC100800689), mRNA	Q9LS28	162	4e-43	GTE12_ARATH Transcription factor GTE12 OS=Arabidopsis thaliana GN=GTE12 PE=2 SV=2	YDL070w	94	2e-19	COG5076	Transcription factor involved in chromatin remodeling, contains bromodomain	K11684	8e-28	118	sbi:SORBI_03g001920	bromodomain-containing factor 1
CL1382.Contig22_All	2.5882	3.7061	3.7552	4.5402	0.5399	0.7781	1.58	1.2771	8.193	5.7011	313.2	0	Transcription factor GTE12 [Glycine soja]	gi|502078504|ref|XM_004485910.1|	280	8e-72	PREDICTED: Cicer arietinum transcription factor GTE10-like (LOC101496566), transcript variant X3, mRNA	Q9LS28	161	3e-42	GTE12_ARATH Transcription factor GTE12 OS=Arabidopsis thaliana GN=GTE12 PE=2 SV=2	YDL070w	94	4e-19	COG5076	Transcription factor involved in chromatin remodeling, contains bromodomain	K11684	1e-27	119	sbi:SORBI_03g001920	bromodomain-containing factor 1
CL1382.Contig23_All	0.7252	2.9329	1.821	2.4841	0.2611	0.4113	0.3796	0.4578	1.9539	2.6104	124	2e-27	Transcription factor GTE12 [Glycine soja]	gi|502078504|ref|XM_004485910.1|	414	1e-112	PREDICTED: Cicer arietinum transcription factor GTE10-like (LOC101496566), transcript variant X3, mRNA	Q9LS28	249	5e-74	GTE12_ARATH Transcription factor GTE12 OS=Arabidopsis thaliana GN=GTE12 PE=2 SV=2	YDL070w	92.8	8e-19	COG5076	Transcription factor involved in chromatin remodeling, contains bromodomain	K11684	1e-27	119	sbi:SORBI_03g001920	bromodomain-containing factor 1
CL1382.Contig30_All	1.5833	1.5808	1.0591	2.6625	0.5663	0.3339	0.6103	0.4429	2.256	2.3717	715.7	0	Transcription factor GTE12 [Glycine soja]	gi|502078504|ref|XM_004485910.1|	301	2e-78	PREDICTED: Cicer arietinum transcription factor GTE10-like (LOC101496566), transcript variant X3, mRNA	Q9LS28	251	2e-74	GTE12_ARATH Transcription factor GTE12 OS=Arabidopsis thaliana GN=GTE12 PE=2 SV=2	YDL070w	92.8	9e-19	COG5076	Transcription factor involved in chromatin remodeling, contains bromodomain	K11684	5e-30	126	sbi:SORBI_03g001920	bromodomain-containing factor 1
CL1382.Contig32_All	1.0814	1.8905	1.4614	2.2383	0.3575	0.2509	0.473	0.5851	2.3755	2.2002	713.4	0	Transcription factor GTE12 [Glycine soja]	gi|502078504|ref|XM_004485910.1|	309	9e-81	PREDICTED: Cicer arietinum transcription factor GTE10-like (LOC101496566), transcript variant X3, mRNA	Q9LS28	250	2e-74	GTE12_ARATH Transcription factor GTE12 OS=Arabidopsis thaliana GN=GTE12 PE=2 SV=2	YDL070w	94	4e-19	COG5076	Transcription factor involved in chromatin remodeling, contains bromodomain	K11684	1e-27	119	sbi:SORBI_03g001920	bromodomain-containing factor 1
CL13848.Contig37_All	1.9247	1.9017	0.6887	0.808	0.0758	0.076	1.7749	2.1713	0.5813	0.9606	495.4	9e-168	hypothetical protein PHAVU_001G031300g [Phaseolus vulgaris] >gi|561034418|gb|ESW32948.1| hypothetical protein PHAVU_001G031300g [Phaseolus vulgaris]	gi|571449185|ref|XM_003523584.2|	349	9e-93	PREDICTED: Glycine max transcription factor bHLH74-like (LOC100787749), transcript variant X1, mRNA	Q6NKN9	211	1e-61	BH074_ARATH Transcription factor bHLH74 OS=Arabidopsis thaliana GN=BHLH74 PE=1 SV=1	--	--	--	--	--	K12126	5e-17	86.3	aly:ARALYDRAFT_471048	phytochrome-interacting factor 3
CL13848.Contig50_All	5.5529	6.6599	3.6319	2.4347	0.3427	0.1145	6.0459	7.5946	2.7734	2.4812	261.9	9e-84	hypothetical protein PHAVU_001G031300g [Phaseolus vulgaris] >gi|561034418|gb|ESW32948.1| hypothetical protein PHAVU_001G031300g [Phaseolus vulgaris]	gi|571571959|ref|XM_003556906.2|	331	7e-88	PREDICTED: Glycine max transcription factor bHLH74-like (LOC100794464), mRNA	Q6NKN9	184	1e-56	BH074_ARATH Transcription factor bHLH74 OS=Arabidopsis thaliana GN=BHLH74 PE=1 SV=1	--	--	--	--	--	K12126	4e-13	69.7	aly:ARALYDRAFT_471048	phytochrome-interacting factor 3
CL13904.Contig3_All	1.1597	0.5458	3.9617	4.5135	0.5367	0.639	0.1024	0.2745	4.6296	2.267	1120.9	0	PREDICTED: subtilisin-like protease SBT5.4 [Cicer arietinum]	gi|502129041|ref|XM_004500105.1|	553	1e-154	PREDICTED: Cicer arietinum subtilisin-like protease-like (LOC101491145), mRNA	F4JXC5	837	0	SBT54_ARATH Subtilisin-like protease SBT5.4 OS=Arabidopsis thaliana GN=SBT5.4 PE=1 SV=1	BS_vpr	128	8e-30	COG1404	Subtilisin-like serine proteases	K08653	2e-06	53.1	pop:POPTR_779308	membrane-bound transcription factor site-1 protease [EC:3.4.21.112]
CL1393.Contig1_All	0.8128	0	0	0.1114	0	0	3.9144	3.4206	0.3205	0.2018	208.4	1e-64	PREDICTED: transcription factor MYB114-like [Cicer arietinum]	gi|571536500|ref|XM_003549876.2|	200	2e-48	PREDICTED: Glycine max anthocyanin regulatory C1 protein-like (LOC100811754), mRNA	Q9SEI0	120	4e-40	WER_ARATH Transcription factor WER OS=Arabidopsis thaliana GN=WER PE=1 SV=1	ECU11g1690	70.9	5e-20	COG5147	Myb superfamily proteins, including transcription factors and mRNA splicing factors	K09422	1e-49	166	pop:POPTR_668851	myb proto-oncogene protein, plant
CL1393.Contig2_All	0.9993	0.2281	0.9549	0.112	0	0	5.8207	4.9891	0.7522	0.203	266.2	3e-87	PREDICTED: transcription factor MYB114-like [Cicer arietinum]	gi|571536500|ref|XM_003549876.2|	276	5e-71	PREDICTED: Glycine max anthocyanin regulatory C1 protein-like (LOC100811754), mRNA	Q9SEI0	160	8e-48	WER_ARATH Transcription factor WER OS=Arabidopsis thaliana GN=WER PE=1 SV=1	ECU11g1690	100	2e-24	COG5147	Myb superfamily proteins, including transcription factors and mRNA splicing factors	K09422	2e-71	221	pop:POPTR_668851	myb proto-oncogene protein, plant
CL1393.Contig3_All	2.158	0.4925	1.2373	1.5724	0	0	15.9887	20.5255	1.1603	0.4383	280	4e-93	PREDICTED: transcription factor MYB114-like [Cicer arietinum]	gi|571536500|ref|XM_003549876.2|	327	1e-86	PREDICTED: Glycine max anthocyanin regulatory C1 protein-like (LOC100811754), mRNA	Q9SEI0	174	2e-53	WER_ARATH Transcription factor WER OS=Arabidopsis thaliana GN=WER PE=1 SV=1	ECU11g1690	108	9e-28	COG5147	Myb superfamily proteins, including transcription factors and mRNA splicing factors	K09422	1e-76	234	pop:POPTR_668851	myb proto-oncogene protein, plant
CL1393.Contig5_All	0.0842	0	0.0885	0.1039	0	0	4.6023	5.3426	0	0.0941	129.4	1e-65	PREDICTED: transcription factor MYB114-like [Cicer arietinum]	gi|571487133|ref|XM_003538699.2|	151	2e-33	PREDICTED: Glycine max anthocyanin regulatory C1 protein-like (LOC100816449), mRNA	Q9SEI0	106	6e-36	WER_ARATH Transcription factor WER OS=Arabidopsis thaliana GN=WER PE=1 SV=1	ECU11g1690	62.8	4e-17	COG5147	Myb superfamily proteins, including transcription factors and mRNA splicing factors	K09422	7e-54	136	pop:POPTR_668851	myb proto-oncogene protein, plant
CL13949.Contig1_All	31.6738	97.7748	33.8229	76.6878	1.445	7.3832	3.511	3.3375	106.323	91.3526	317	6e-102	PREDICTED: transcription factor MYB44-like [Prunus mume]	gi|470140451|ref|XM_004305906.1|	256	8e-65	PREDICTED: Fragaria vesca subsp. vesca transcription factor MYB44-like (LOC101306948), mRNA	Q9FDW1	244	6e-76	MYB44_ARATH Transcription factor MYB44 OS=Arabidopsis thaliana GN=MYB44 PE=2 SV=1	ECU11g1690	135	6e-36	COG5147	Myb superfamily proteins, including transcription factors and mRNA splicing factors	K09422	1e-90	283	vvi:100233128	myb proto-oncogene protein, plant
CL13967.Contig2_All	3.6058	3.0306	0.2707	0.397	0.1788	0.3286	22.9629	25.8499	1.0663	1.5465	487.6	2e-160	trihelix transcription factor [Medicago truncatula] >gi|355480051|gb|AES61254.1| trihelix transcription factor [Medicago truncatula]	gi|502117355|ref|XR_189644.1|	200	7e-48	PREDICTED: Cicer arietinum trihelix transcription factor GTL2-like (LOC101495862), transcript variant X2, misc_RNA	Q8H181	318	8e-97	GTL2_ARATH Trihelix transcription factor GTL2 OS=Arabidopsis thaliana GN=At5g28300 PE=2 SV=1	--	--	--	--	--	--	--	--	--	--
CL14002.Contig6_All	1.1599	6.3595	3.7859	8.8828	0	0.2832	0.1726	0.0578	0.4333	1.9094	73.6	2e-13	uncharacterized LOC100305565 [Glycine max] >gi|734350510|gb|KHN12457.1| Protein TIFY 5A [Glycine soja] >gi|918463849|gb|ALA09269.1| ZIM transcription factor, partial [Glycine max]	gi|351721399|ref|NM_001249767.1|	117	4e-23	Glycine max uncharacterized LOC100500349 (LOC100500349), mRNA	Q8LBM2	59.7	1e-10	TIF5A_ARATH Protein TIFY 5A OS=Arabidopsis thaliana GN=TIFY5A PE=1 SV=1	--	--	--	--	--	--	--	--	--	--
CL14011.Contig1_All	0	0.1174	0.0492	0.1731	0	0	0.7053	0.9745	0.498	0.2613	455.3	4e-154	unnamed protein product [Vitis vinifera]	gi|571461421|ref|XM_006581928.1|	272	2e-69	PREDICTED: Glycine max transcription factor UNE10-like (LOC102667566), transcript variant X2, mRNA	Q570R7	194	9e-56	PIF7_ARATH Transcription factor PIF7 OS=Arabidopsis thaliana GN=BHLH72 PE=1 SV=2	--	--	--	--	--	K12126	3e-25	111	ath:AT1G09530	phytochrome-interacting factor 3
CL14011.Contig3_All	0.9046	0.6623	0.6735	1.9985	0	0.035	5.7884	9.7067	2.2737	2.2735	457.2	1e-152	unnamed protein product [Vitis vinifera]	gi|571461421|ref|XM_006581928.1|	264	5e-67	PREDICTED: Glycine max transcription factor UNE10-like (LOC102667566), transcript variant X2, mRNA	Q570R7	194	3e-55	PIF7_ARATH Transcription factor PIF7 OS=Arabidopsis thaliana GN=BHLH72 PE=1 SV=2	--	--	--	--	--	K12126	3e-25	112	ath:AT1G09530	phytochrome-interacting factor 3
CL14011.Contig5_All	1.1773	0.8866	1.6088	0.5807	0	0	3.8825	4.6819	1.9497	1.3152	195.3	5e-58	PREDICTED: transcription factor PIF7 isoform X2 [Ricinus communis]	gi|571461421|ref|XM_006581928.1|	143	4e-31	PREDICTED: Glycine max transcription factor UNE10-like (LOC102667566), transcript variant X2, mRNA	Q8GZ38	97.8	2e-23	UNE10_ARATH Transcription factor UNE10 OS=Arabidopsis thaliana GN=UNE10 PE=2 SV=1	--	--	--	--	--	K12126	5e-08	54.7	aly:ARALYDRAFT_471048	phytochrome-interacting factor 3
CL14016.Contig3_All	0.2874	0.6492	1.4499	1.2757	2.3409	1.9734	0.5957	0.5986	0.6798	0.5136	194.9	3e-55	Basic helix-loop-helix DNA-binding superfamily protein [Theobroma cacao] >gi|508719176|gb|EOY11073.1| Basic helix-loop-helix DNA-binding superfamily protein [Theobroma cacao]	gi|502117931|ref|XM_004495960.1|	103	7e-19	PREDICTED: Cicer arietinum transcription factor UNE12-like (LOC101511757), mRNA	O22768	87.8	7e-19	UNE12_ARATH Transcription factor UNE12 OS=Arabidopsis thaliana GN=UNE12 PE=2 SV=2	--	--	--	--	--	--	--	--	--	--
CL14051.Contig1_All	0.3625	6.1884	4.954	3.2188	0.2014	0.0673	0	0	15.7813	16.6044	278.5	2e-89	Putative WRKY transcription factor 70 [Glycine soja]	gi|402793887|ref|NM_001252891.2|	125	1e-25	Glycine max probable WRKY transcription factor 70-like (LOC100811812), mRNA	Q9LY00	129	3e-34	WRK70_ARATH Probable WRKY transcription factor 70 OS=Arabidopsis thaliana GN=WRKY70 PE=2 SV=1	--	--	--	--	--	K13425	3e-11	65.9	rcu:RCOM_1616660	WRKY transcription factor 22
CL14051.Contig2_All	0.2029	0.3819	0.1066	0	0	0	0	0	2.0397	1.1331	136.3	5e-36	hypothetical protein VIGAN_04113700 [Vigna angularis var. angularis]	gi|160955089|emb|CU225304.1|	69.9	5e-09	Populus EST from leave	Q9LY00	68.9	3e-13	WRK70_ARATH Probable WRKY transcription factor 70 OS=Arabidopsis thaliana GN=WRKY70 PE=2 SV=1	--	--	--	--	--	--	--	--	--	--
CL14216.Contig10_All	0.2204	0.0461	0.5019	0.3623	0.102	0.3068	0.8998	1.0085	2.042	2.1336	875.2	0	PREDICTED: protein LHY isoform X1 [Glycine max] >gi|571464905|ref|XP_006583199.1| PREDICTED: protein LHY isoform X1 [Glycine max] >gi|571464907|ref|XP_006583200.1| PREDICTED: protein LHY isoform X1 [Glycine max] >gi|571464909|ref|XP_006583201.1| PREDICTED: protein LHY isoform X1 [Glycine max] >gi|571464911|ref|XP_006583202.1| PREDICTED: protein LHY isoform X1 [Glycine max] >gi|955329824|ref|XP_01…	gi|571464910|ref|XM_006583139.1|	692	0	PREDICTED: Glycine max MYB transcription factor MYB155 (MYB155), transcript variant X9, mRNA	Q6R0H1	446	1e-146	LHY_ARATH Protein LHY OS=Arabidopsis thaliana GN=LHY PE=1 SV=2	--	--	--	--	--	K12133	2e-146	446	ath:AT1G01060	LATE ELONGATED HYPOCOTYL
CL14216.Contig11_All	0.3626	0.5057	0.2964	0.5465	0	0.1122	0.9111	0.5722	2.0969	1.3502	689.9	0	Protein LHY [Glycine soja]	gi|571443652|ref|XM_006576211.1|	640	1e-180	PREDICTED: Glycine max MYB transcription factor MYB114 (MYB114), transcript variant X2, mRNA	Q6R0H1	368	2e-117	LHY_ARATH Protein LHY OS=Arabidopsis thaliana GN=LHY PE=1 SV=2	--	--	--	--	--	K12133	5e-117	368	ath:AT1G01060	LATE ELONGATED HYPOCOTYL
CL14216.Contig14_All	0	0.0789	0.4293	0.155	0.0872	0	0.6808	0.8032	2.0439	2.5268	1047.7	0	PREDICTED: protein LHY isoform X1 [Glycine max] >gi|571464905|ref|XP_006583199.1| PREDICTED: protein LHY isoform X1 [Glycine max] >gi|571464907|ref|XP_006583200.1| PREDICTED: protein LHY isoform X1 [Glycine max] >gi|571464909|ref|XP_006583201.1| PREDICTED: protein LHY isoform X1 [Glycine max] >gi|571464911|ref|XP_006583202.1| PREDICTED: protein LHY isoform X1 [Glycine max] >gi|955329824|ref|XP_01…	gi|571464899|ref|XM_006583134.1|	1193	0	PREDICTED: Glycine max MYB transcription factor MYB155 (MYB155), transcript variant X4, mRNA	Q6R0H1	510	1e-169	LHY_ARATH Protein LHY OS=Arabidopsis thaliana GN=LHY PE=1 SV=2	--	--	--	--	--	K12133	3e-169	510	ath:AT1G01060	LATE ELONGATED HYPOCOTYL
CL14216.Contig15_All	0.7801	0.9442	0.82	2.4049	3.0175	0.879	5.3551	5.144	6.0639	5.5709	1105.1	0	late elongated hypocotyl and circadian clock associated-1-like protein 1 [Glycine max] >gi|158999368|gb|ABW87008.1| late elongated hypocotyl and circadian clock associated-1-like protein 1 [Glycine max]	gi|571443652|ref|XM_006576211.1|	1374	0	PREDICTED: Glycine max MYB transcription factor MYB114 (MYB114), transcript variant X2, mRNA	Q6R0H1	531	2e-176	LHY_ARATH Protein LHY OS=Arabidopsis thaliana GN=LHY PE=1 SV=2	--	--	--	--	--	K12133	5e-176	531	ath:AT1G01060	LATE ELONGATED HYPOCOTYL
CL14216.Contig16_All	0.4863	0.3949	2.0445	2.0457	0.2118	0.4778	3.9886	5.254	16.4772	15.0494	1070.5	0	late elongated hypocotyl and circadian clock associated-1-like protein 1 [Glycine max] >gi|158999368|gb|ABW87008.1| late elongated hypocotyl and circadian clock associated-1-like protein 1 [Glycine max]	gi|571464910|ref|XM_006583139.1|	1304	0	PREDICTED: Glycine max MYB transcription factor MYB155 (MYB155), transcript variant X9, mRNA	Q6R0H1	530	3e-176	LHY_ARATH Protein LHY OS=Arabidopsis thaliana GN=LHY PE=1 SV=2	--	--	--	--	--	K12133	6e-176	530	ath:AT1G01060	LATE ELONGATED HYPOCOTYL
CL14216.Contig18_All	0.2765	0.2892	0.2906	0.2273	0	0	0.8684	0.9163	1.1992	1.4414	122.1	1e-26	Protein LHY [Glycine soja]	gi|571464910|ref|XM_006583139.1|	492	1e-136	PREDICTED: Glycine max MYB transcription factor MYB155 (MYB155), transcript variant X9, mRNA	Q6R0H1	254	7e-93	LHY_ARATH Protein LHY OS=Arabidopsis thaliana GN=LHY PE=1 SV=2	--	--	--	--	--	K12133	2e-92	254	ath:AT1G01060	LATE ELONGATED HYPOCOTYL
CL14216.Contig19_All	0	0.0382	0.064	0	0.0282	0.0848	0.6314	0.6057	0.9729	0.5445	1090.1	0	late elongated hypocotyl and circadian clock associated-1-like protein 1 [Glycine max] >gi|158999368|gb|ABW87008.1| late elongated hypocotyl and circadian clock associated-1-like protein 1 [Glycine max]	gi|571443652|ref|XM_006576211.1|	1294	0	PREDICTED: Glycine max MYB transcription factor MYB114 (MYB114), transcript variant X2, mRNA	Q6R0H1	533	5e-178	LHY_ARATH Protein LHY OS=Arabidopsis thaliana GN=LHY PE=1 SV=2	--	--	--	--	--	K12133	1e-177	533	ath:AT1G01060	LATE ELONGATED HYPOCOTYL
CL14216.Contig20_All	0.7933	0.0687	0.4026	0.3711	0.1519	0.0508	1.8559	1.8909	2.3946	1.4974	95.5	1e-17	late elongated hypocotyl and circadian clock associated-1-like protein 1 [Glycine max] >gi|158999368|gb|ABW87008.1| late elongated hypocotyl and circadian clock associated-1-like protein 1 [Glycine max]	gi|571464910|ref|XM_006583139.1|	783	0	PREDICTED: Glycine max MYB transcription factor MYB155 (MYB155), transcript variant X9, mRNA	Q6R0H1	440	3e-141	LHY_ARATH Protein LHY OS=Arabidopsis thaliana GN=LHY PE=1 SV=2	--	--	--	--	--	K12133	7e-141	440	ath:AT1G01060	LATE ELONGATED HYPOCOTYL
CL14216.Contig22_All	0.2617	0.0411	0.2407	0.7663	0.3936	0.0607	0.8937	0.9601	1.9345	1.9	1063.5	0	PREDICTED: protein LHY isoform X1 [Glycine max] >gi|571464905|ref|XP_006583199.1| PREDICTED: protein LHY isoform X1 [Glycine max] >gi|571464907|ref|XP_006583200.1| PREDICTED: protein LHY isoform X1 [Glycine max] >gi|571464909|ref|XP_006583201.1| PREDICTED: protein LHY isoform X1 [Glycine max] >gi|571464911|ref|XP_006583202.1| PREDICTED: protein LHY isoform X1 [Glycine max] >gi|955329824|ref|XP_01…	gi|571464910|ref|XM_006583139.1|	1229	0	PREDICTED: Glycine max MYB transcription factor MYB155 (MYB155), transcript variant X9, mRNA	Q6R0H1	525	5e-176	LHY_ARATH Protein LHY OS=Arabidopsis thaliana GN=LHY PE=1 SV=2	--	--	--	--	--	K12133	1e-175	525	ath:AT1G01060	LATE ELONGATED HYPOCOTYL
CL14216.Contig27_All	0.1651	0.2072	0.5785	1.0859	0.5095	0.4852	2.3596	2.1627	4.2319	3.4431	1099.3	0	PREDICTED: protein LHY isoform X1 [Glycine max] >gi|571464905|ref|XP_006583199.1| PREDICTED: protein LHY isoform X1 [Glycine max] >gi|571464907|ref|XP_006583200.1| PREDICTED: protein LHY isoform X1 [Glycine max] >gi|571464909|ref|XP_006583201.1| PREDICTED: protein LHY isoform X1 [Glycine max] >gi|571464911|ref|XP_006583202.1| PREDICTED: protein LHY isoform X1 [Glycine max] >gi|955329824|ref|XP_01…	gi|571443652|ref|XM_006576211.1|	1451	0	PREDICTED: Glycine max MYB transcription factor MYB114 (MYB114), transcript variant X2, mRNA	Q6R0H1	528	8e-175	LHY_ARATH Protein LHY OS=Arabidopsis thaliana GN=LHY PE=1 SV=2	--	--	--	--	--	K12133	2e-174	528	ath:AT1G01060	LATE ELONGATED HYPOCOTYL
CL14216.Contig28_All	0.8675	0.9582	1.0213	1.6688	0.3212	0.3864	3.0079	2.3656	4.3919	2.946	699.9	0	hypothetical protein GLYMA_07G048500 [Glycine max]	gi|571464910|ref|XM_006583139.1|	743	0	PREDICTED: Glycine max MYB transcription factor MYB155 (MYB155), transcript variant X9, mRNA	Q6R0H1	331	9e-145	LHY_ARATH Protein LHY OS=Arabidopsis thaliana GN=LHY PE=1 SV=2	--	--	--	--	--	K12133	2e-144	331	ath:AT1G01060	LATE ELONGATED HYPOCOTYL
CL14216.Contig29_All	3.4924	3.1848	8.0016	14.1309	7.5265	4.8359	30.9258	31.8014	62.2563	60.8353	1092.4	0	PREDICTED: protein LHY isoform X1 [Glycine max] >gi|571464905|ref|XP_006583199.1| PREDICTED: protein LHY isoform X1 [Glycine max] >gi|571464907|ref|XP_006583200.1| PREDICTED: protein LHY isoform X1 [Glycine max] >gi|571464909|ref|XP_006583201.1| PREDICTED: protein LHY isoform X1 [Glycine max] >gi|571464911|ref|XP_006583202.1| PREDICTED: protein LHY isoform X1 [Glycine max] >gi|955329824|ref|XP_01…	gi|571443652|ref|XM_006576211.1|	1437	0	PREDICTED: Glycine max MYB transcription factor MYB114 (MYB114), transcript variant X2, mRNA	Q6R0H1	529	3e-175	LHY_ARATH Protein LHY OS=Arabidopsis thaliana GN=LHY PE=1 SV=2	--	--	--	--	--	K12133	6e-175	529	ath:AT1G01060	LATE ELONGATED HYPOCOTYL
CL14216.Contig2_All	0.7574	0.6613	1.6615	2.1928	0.884	0.1528	3.8783	3.2738	5.1417	5.7017	876.7	0	MYB transcription factor MYB114 [Glycine max] >gi|158999370|gb|ABW87009.1| late elongated hypocotyl and circadian clock associated-1-like protein 2 [Glycine max]	gi|571443652|ref|XM_006576211.1|	872	0	PREDICTED: Glycine max MYB transcription factor MYB114 (MYB114), transcript variant X2, mRNA	Q6R0H1	449	9e-147	LHY_ARATH Protein LHY OS=Arabidopsis thaliana GN=LHY PE=1 SV=2	--	--	--	--	--	K12133	2e-146	449	ath:AT1G01060	LATE ELONGATED HYPOCOTYL
CL14216.Contig30_All	0.3563	0.3096	0.6338	0.5745	0.1776	0.5086	2.7113	3.3993	5.0247	4.4391	1065.8	0	PREDICTED: protein LHY isoform X1 [Glycine max] >gi|571464905|ref|XP_006583199.1| PREDICTED: protein LHY isoform X1 [Glycine max] >gi|571464907|ref|XP_006583200.1| PREDICTED: protein LHY isoform X1 [Glycine max] >gi|571464909|ref|XP_006583201.1| PREDICTED: protein LHY isoform X1 [Glycine max] >gi|571464911|ref|XP_006583202.1| PREDICTED: protein LHY isoform X1 [Glycine max] >gi|955329824|ref|XP_01…	gi|571464910|ref|XM_006583139.1|	1249	0	PREDICTED: Glycine max MYB transcription factor MYB155 (MYB155), transcript variant X9, mRNA	Q6R0H1	528	1e-174	LHY_ARATH Protein LHY OS=Arabidopsis thaliana GN=LHY PE=1 SV=2	--	--	--	--	--	K12133	2e-174	528	ath:AT1G01060	LATE ELONGATED HYPOCOTYL
CL14216.Contig3_All	4.5466	4.744	8.637	19.2854	12.5757	6.4558	36.1032	36.3847	60.7793	60.8252	1093.2	0	late elongated hypocotyl and circadian clock associated-1-like protein 1 [Glycine max] >gi|158999368|gb|ABW87008.1| late elongated hypocotyl and circadian clock associated-1-like protein 1 [Glycine max]	gi|571443652|ref|XM_006576211.1|	1370	0	PREDICTED: Glycine max MYB transcription factor MYB114 (MYB114), transcript variant X2, mRNA	Q6R0H1	523	8e-173	LHY_ARATH Protein LHY OS=Arabidopsis thaliana GN=LHY PE=1 SV=2	--	--	--	--	--	K12133	2e-172	523	ath:AT1G01060	LATE ELONGATED HYPOCOTYL
CL14219.Contig3_All	0.6948	0.6977	1.5192	0.1714	4.0651	2.3212	0.3666	0.2632	0.526	0.7451	877.1	0	hypothetical protein PHAVU_001G187000g [Phaseolus vulgaris] >gi|561036322|gb|ESW34852.1| hypothetical protein PHAVU_001G187000g [Phaseolus vulgaris]	gi|571446327|ref|XM_003521399.2|	809	0	PREDICTED: Glycine max trihelix transcription factor PTL-like (LOC100815903), mRNA	Q9LZS0	459	2e-149	PTL_ARATH Trihelix transcription factor PTL OS=Arabidopsis thaliana GN=PTL PE=2 SV=1	--	--	--	--	--	--	--	--	--	--
CL1423.Contig29_All	2.7792	5.708	1.5639	1.9039	0.3378	0.521	4.0998	4.3857	3.1546	2.1324	920.6	0	Transcription factor PIF3 [Glycine soja]	gi|571482994|ref|XM_006589038.1|	676	0	PREDICTED: Glycine max transcription factor PIF3-like (LOC100820151), mRNA	O80536	280	4e-83	PIF3_ARATH Transcription factor PIF3 OS=Arabidopsis thaliana GN=PIF3 PE=1 SV=1	--	--	--	--	--	K12126	3e-88	295	aly:ARALYDRAFT_471048	phytochrome-interacting factor 3
CL14245.Contig1_All	149.874	69.4967	181.433	118.165	137.158	43.5676	0.0519	0.1563	245.97	155.74	565.1	0	NAC domain-containing protein 18 [Glycine soja]	gi|571494636|ref|XM_003540402.2|	565	1e-158	PREDICTED: Glycine max NAC domain-containing protein 18-like (LOC100784578), mRNA	Q9LD44	382	3e-129	NAC56_ARATH NAC transcription factor 56 OS=Arabidopsis thaliana GN=NAC056 PE=2 SV=1	--	--	--	--	--	--	--	--	--	--
CL14245.Contig2_All	1.4146	0.8877	4.0891	6.5414	0.3274	0	0	0	1.6733	0	61.2	1e-10	NAC transcription factor-like protein [Medicago truncatula] >gi|657399308|gb|KEH38791.1| NAC transcription factor-like protein [Medicago truncatula]	gi|502084379|ref|XM_004487621.1|	75.8	2e-11	PREDICTED: Cicer arietinum NAC domain-containing protein 18-like (LOC101506350), mRNA	--	--	--	--	--	--	--	--	--	--	--	--	--	--
CL14270.Contig2_All	0.1385	0.2318	0.1456	0.2278	2.8638	2.0139	0.2175	0.0874	0.4369	0.2063	487.6	2e-167	PREDICTED: protein REVEILLE 5 isoform X1 [Glycine max] >gi|947057183|gb|KRH06589.1| hypothetical protein GLYMA_16G032600 [Glycine max]	gi|571525257|ref|XM_003548594.2|	638	1e-180	PREDICTED: Glycine max MYB transcription factor MYB146 (MYB146), transcript variant X1, mRNA	Q8H0W3	325	3e-106	RVE6_ARATH Protein REVEILLE 6 OS=Arabidopsis thaliana GN=RVE6 PE=2 SV=1	--	--	--	--	--	K12133	9e-27	117	ath:AT1G01060	LATE ELONGATED HYPOCOTYL
CL14270.Contig3_All	0.9481	0.833	0.9966	2.3968	8.5575	7.0828	0.7593	0.5386	1.9066	1.5887	227.6	1e-121	PREDICTED: protein REVEILLE 5 isoform X1 [Glycine max] >gi|947057183|gb|KRH06589.1| hypothetical protein GLYMA_16G032600 [Glycine max]	gi|110931851|gb|DQ822984.1|	383	1e-103	Glycine max MYB transcription factor MYB146 (MYB146) mRNA, partial cds	Q8H0W3	198	1e-82	RVE6_ARATH Protein REVEILLE 6 OS=Arabidopsis thaliana GN=RVE6 PE=2 SV=1	--	--	--	--	--	K12134	3e-26	115	aly:ARALYDRAFT_904154	circadian clock associated 1
CL14270.Contig4_All	0.6957	0.6404	0.3413	0.6292	7.9862	3.2712	0.3059	0.3074	0.6584	0.2073	488	1e-167	PREDICTED: protein REVEILLE 5 isoform X1 [Glycine max] >gi|947057183|gb|KRH06589.1| hypothetical protein GLYMA_16G032600 [Glycine max]	gi|571525257|ref|XM_003548594.2|	622	1e-175	PREDICTED: Glycine max MYB transcription factor MYB146 (MYB146), transcript variant X1, mRNA	Q8H0W3	324	9e-106	RVE6_ARATH Protein REVEILLE 6 OS=Arabidopsis thaliana GN=RVE6 PE=2 SV=1	--	--	--	--	--	K12133	9e-27	117	ath:AT1G01060	LATE ELONGATED HYPOCOTYL
CL14287.Contig6_All	0.6985	3.7573	5.3493	4.5528	0.9237	2.315	0.094	0	3.1869	3.9014	202.6	5e-63	hypothetical protein PHAVU_006G179800g [Phaseolus vulgaris] >gi|561021311|gb|ESW20082.1| hypothetical protein PHAVU_006G179800g [Phaseolus vulgaris]	gi|571488947|ref|XM_006591012.1|	131	2e-27	PREDICTED: Glycine max heterogeneous nuclear ribonucleoprotein Q-like (LOC100785076), transcript variant X3, mRNA	O04681	170	9e-53	PTI5_SOLLC Pathogenesis-related genes transcriptional activator PTI5 OS=Solanum lycopersicum GN=PTI5 PE=2 SV=1	--	--	--	--	--	K14517	9e-41	143	ath:AT5G47220	ethylene-responsive transcription factor 2
CL14287.Contig9_All	1.5463	8.0618	12.6279	15.1077	0.2202	1.3245	0.056	0.0563	6.4018	9.9654	203.4	8e-61	hypothetical protein PHAVU_006G179800g [Phaseolus vulgaris] >gi|561021311|gb|ESW20082.1| hypothetical protein PHAVU_006G179800g [Phaseolus vulgaris]	gi|571492734|ref|XM_006592266.1|	285	8e-74	PREDICTED: Glycine max heterogeneous nuclear ribonucleoprotein R-like (LOC100806658), transcript variant X2, mRNA	O04681	170	1e-50	PTI5_SOLLC Pathogenesis-related genes transcriptional activator PTI5 OS=Solanum lycopersicum GN=PTI5 PE=2 SV=1	--	--	--	--	--	K14517	9e-40	145	ath:AT5G47220	ethylene-responsive transcription factor 2
CL14384.Contig9_All	1.8598	2.3343	1.4449	1.1467	0.0374	0.2626	2.8951	1.8375	1.0521	1.7614	178.7	3e-44	TMV resistance protein N [Glycine soja]	--	--	--	--	Q9SZ67	90.9	2e-18	WRK19_ARATH Probable WRKY transcription factor 19 OS=Arabidopsis thaliana GN=WRKY19 PE=2 SV=1	YJL005w_1	53.9	1e-06	COG4886	Leucine-rich repeat (LRR) protein	K06685	2e-09	62.8	aly:ARALYDRAFT_492950	maintenance of ploidy protein MOB1 (MPS1 binder 1)
CL1460.Contig4_All	1.7093	1.4079	1.516	1.1856	0	0.0496	1.8622	1.2644	2.7801	1.4917	165.2	1e-43	PREDICTED: transcription factor TGA6 isoform X3 [Vigna radiata var. radiata]	gi|571520999|ref|XM_006598032.1|	785	0	PREDICTED: Glycine max transcription factor bZIP98 (BZIP98), transcript variant X3, mRNA	P23923	372	1e-125	HBP1B_WHEAT Transcription factor HBP-1b(c38) OS=Triticum aestivum PE=2 SV=1	--	--	--	--	--	K14431	6e-142	420	mtr:MTR_8g040120	transcription factor TGA
CL1460.Contig7_All	8.138	8.0639	3.7368	3.9085	0.793	0.5167	5.2867	5.4344	3.2425	3.5406	97.4	4e-19	PREDICTED: transcription factor TGA6-like [Cicer arietinum] >gi|828329485|ref|XP_012574257.1| PREDICTED: transcription factor TGA6-like [Cicer arietinum] >gi|828329487|ref|XP_012574258.1| PREDICTED: transcription factor TGA6-like [Cicer arietinum] >gi|828329489|ref|XP_012574259.1| PREDICTED: transcription factor TGA6-like [Cicer arietinum] >gi|828329491|ref|XP_012574260.1| PREDICTED: transcriptio…	gi|571562967|ref|XM_006605328.1|	1245	0	PREDICTED: Glycine max transcription factor HBP-1b(c1)-like (LOC100816123), transcript variant X1, mRNA	Q41558	503	1e-172	HBP1C_WHEAT Transcription factor HBP-1b(c1) (Fragment) OS=Triticum aestivum PE=1 SV=2	--	--	--	--	--	K14431	0	670	gmx:778190	transcription factor TGA
CL1462.Contig1_All	19.0814	16.5805	15.2506	22.5553	13.6396	8.1725	6.7553	5.3453	27.7798	21.1263	493.4	4e-171	hypothetical protein PHAVU_007G000400g [Phaseolus vulgaris] >gi|561015779|gb|ESW14583.1| hypothetical protein PHAVU_007G000400g [Phaseolus vulgaris]	gi|571570637|ref|XM_003556539.2|	357	3e-95	PREDICTED: Glycine max uncharacterized LOC100779050 (LOC100779050), mRNA	Q8VZ20	336	4e-112	ASR3_ARATH Trihelix transcription factor ASR3 OS=Arabidopsis thaliana GN=ASR3 PE=1 SV=1	--	--	--	--	--	--	--	--	--	--
CL1479.Contig1_All	0.2479	0.1867	0.3126	0.1223	0.0459	0.046	2.2886	1.0795	0.2345	0.1661	72	4e-11	WRKY transcription factor 44-like [Glycine max] >gi|918463843|gb|ALA09266.1| WRKY transcription factor [Glycine max]	gi|571558314|ref|XM_003554303.2|	256	9e-65	PREDICTED: Glycine max WRKY transcription factor 44-like (LOC100794069), mRNA	Q9ZUU0	210	2e-84	WRK44_ARATH WRKY transcription factor 44 OS=Arabidopsis thaliana GN=WRKY44 PE=1 SV=2	--	--	--	--	--	K13424	5e-61	138	rcu:RCOM_0664190	WRKY transcription factor 33
CL1479.Contig2_All	1.9373	1.0807	1.1766	1.1679	0	0.0799	4.7053	5.9106	1.7824	1.8756	596.3	0	WRKY transcription factor 44-like [Glycine max] >gi|918463843|gb|ALA09266.1| WRKY transcription factor [Glycine max]	gi|571558314|ref|XM_003554303.2|	335	1e-88	PREDICTED: Glycine max WRKY transcription factor 44-like (LOC100794069), mRNA	Q9ZUU0	345	4e-112	WRK44_ARATH WRKY transcription factor 44 OS=Arabidopsis thaliana GN=WRKY44 PE=1 SV=2	--	--	--	--	--	K13424	2e-74	250	aly:ARALYDRAFT_482857	WRKY transcription factor 33
CL1479.Contig3_All	0.5917	0	0.1659	0.4864	0	0	1.5238	1.3072	0.1866	0.0441	575.9	0	WRKY transcription factor 44-like [Glycine max] >gi|918463843|gb|ALA09266.1| WRKY transcription factor [Glycine max]	gi|571558314|ref|XM_003554303.2|	274	5e-70	PREDICTED: Glycine max WRKY transcription factor 44-like (LOC100794069), mRNA	Q9ZUU0	325	2e-103	WRK44_ARATH WRKY transcription factor 44 OS=Arabidopsis thaliana GN=WRKY44 PE=1 SV=2	--	--	--	--	--	K13424	2e-66	230	aly:ARALYDRAFT_482857	WRKY transcription factor 33
CL1479.Contig4_All	0.0497	0	0.3135	0.3678	0	0.0461	0.843	1.2236	0.1176	0.1666	557	0	WRKY transcription factor 44-like [Glycine max] >gi|918463843|gb|ALA09266.1| WRKY transcription factor [Glycine max]	gi|571558314|ref|XM_003554303.2|	357	3e-95	PREDICTED: Glycine max WRKY transcription factor 44-like (LOC100794069), mRNA	Q9ZUU0	325	2e-105	WRK44_ARATH WRKY transcription factor 44 OS=Arabidopsis thaliana GN=WRKY44 PE=1 SV=2	--	--	--	--	--	K13424	2e-74	250	rcu:RCOM_0664190	WRKY transcription factor 33
CL1479.Contig5_All	1.1431	0.538	0.7009	0.5286	0	0	2.6027	3.1116	0.338	0.7449	602.8	0	WRKY transcription factor 44-like [Glycine max] >gi|918463843|gb|ALA09266.1| WRKY transcription factor [Glycine max]	gi|571558314|ref|XM_003554303.2|	402	1e-109	PREDICTED: Glycine max WRKY transcription factor 44-like (LOC100794069), mRNA	Q9ZUU0	346	4e-113	WRK44_ARATH WRKY transcription factor 44 OS=Arabidopsis thaliana GN=WRKY44 PE=1 SV=2	--	--	--	--	--	K13424	1e-74	251	rcu:RCOM_0664190	WRKY transcription factor 33
CL1479.Contig8_All	1.8425	1.119	1.2182	1.0994	0	0.0276	6.188	6.3591	0.914	0.7303	603.2	0	WRKY transcription factor 44-like [Glycine max] >gi|918463843|gb|ALA09266.1| WRKY transcription factor [Glycine max]	gi|571558314|ref|XM_003554303.2|	410	1e-111	PREDICTED: Glycine max WRKY transcription factor 44-like (LOC100794069), mRNA	Q9ZUU0	344	2e-108	WRK44_ARATH WRKY transcription factor 44 OS=Arabidopsis thaliana GN=WRKY44 PE=1 SV=2	--	--	--	--	--	K13424	2e-73	253	aly:ARALYDRAFT_482857	WRKY transcription factor 33
CL1479.Contig9_All	1.9074	0.7807	1.0025	2.301	0	0	5.8604	5.6929	1.0791	0.8338	592.8	0	WRKY transcription factor 44-like [Glycine max] >gi|918463843|gb|ALA09266.1| WRKY transcription factor [Glycine max]	gi|571558314|ref|XM_003554303.2|	335	1e-88	PREDICTED: Glycine max WRKY transcription factor 44-like (LOC100794069), mRNA	Q9ZUU0	344	2e-111	WRK44_ARATH WRKY transcription factor 44 OS=Arabidopsis thaliana GN=WRKY44 PE=1 SV=2	--	--	--	--	--	K13424	5e-73	247	aly:ARALYDRAFT_482857	WRKY transcription factor 33
CL1560.Contig3_All	1.7186	1.5279	8.1291	5.9162	0.2651	0.1994	1.6193	2.4408	4.0658	5.5994	352.4	2e-116	hypothetical protein PHAVU_005G100700g [Phaseolus vulgaris] >gi|561023073|gb|ESW21803.1| hypothetical protein PHAVU_005G100700g [Phaseolus vulgaris]	gi|571501671|ref|XM_003543275.2|	198	1e-47	PREDICTED: Glycine max transcription activator GLK1-like (LOC100775671), mRNA	Q5Z5I4	231	6e-71	GLK1_ORYSJ Probable transcription factor GLK1 OS=Oryza sativa subsp. japonica GN=GLK1 PE=2 SV=1	--	--	--	--	--	K11086	5e-11	64.7	vcn:VOLCADRAFT_107252	small nuclear ribonucleoprotein B and B'
CL1679.Contig1_All	0.6225	0.6418	0.6543	1.3981	4.7949	3.8165	0.9007	0.5894	0.6837	0.3725	214.9	2e-55	HD domain class transcription factor isoform 2 [Theobroma cacao] >gi|508704174|gb|EOX96070.1| HD domain class transcription factor isoform 2 [Theobroma cacao]	gi|571465361|ref|XM_006583277.1|	860	0	PREDICTED: Glycine max homeobox-leucine zipper protein ANTHOCYANINLESS 2-like (LOC100811873), transcript variant X2, mRNA	Q0WV12	904	0	ANL2_ARATH Homeobox-leucine zipper protein ANTHOCYANINLESS 2 OS=Arabidopsis thaliana GN=ANL2 PE=2 SV=1	YML027w	52.4	4e-06	COG5576	Homeodomain-containing transcription factor	K09338	0	859	aly:ARALYDRAFT_324546	homeobox-leucine zipper protein
CL1679.Contig2_All	0.6028	0.2522	0.2376	0.3097	0	0	0.6389	0.4281	0.1188	0.1964	1414.8	0	HD domain class transcription factor isoform 2 [Theobroma cacao] >gi|508704174|gb|EOX96070.1| HD domain class transcription factor isoform 2 [Theobroma cacao]	gi|571465361|ref|XM_006583277.1|	1061	0	PREDICTED: Glycine max homeobox-leucine zipper protein ANTHOCYANINLESS 2-like (LOC100811873), transcript variant X2, mRNA	Q0WV12	1084	0	ANL2_ARATH Homeobox-leucine zipper protein ANTHOCYANINLESS 2 OS=Arabidopsis thaliana GN=ANL2 PE=2 SV=1	YML027w	52.4	4e-06	COG5576	Homeodomain-containing transcription factor	K09338	0	1039	aly:ARALYDRAFT_324546	homeobox-leucine zipper protein
CL1679.Contig3_All	6.3378	2.3141	1.4535	5.3997	1.1734	0.5347	7.4916	8.4013	1.3631	1.5447	219.6	7e-64	HD domain class transcription factor isoform 2 [Theobroma cacao] >gi|508704174|gb|EOX96070.1| HD domain class transcription factor isoform 2 [Theobroma cacao]	gi|571443931|ref|XM_003521236.2|	178	7e-42	PREDICTED: Glycine max homeobox-leucine zipper protein ANTHOCYANINLESS 2-like (LOC100818372), transcript variant X1, mRNA	Q0WV12	186	7e-54	ANL2_ARATH Homeobox-leucine zipper protein ANTHOCYANINLESS 2 OS=Arabidopsis thaliana GN=ANL2 PE=2 SV=1	--	--	--	--	--	K09338	2e-51	181	aly:ARALYDRAFT_324546	homeobox-leucine zipper protein
CL1679.Contig6_All	3.5783	1.9333	0.9964	1.7826	0.3729	0.5058	4.3093	5.5422	1.2334	1.2971	1401.7	0	HD domain class transcription factor isoform 2 [Theobroma cacao] >gi|508704174|gb|EOX96070.1| HD domain class transcription factor isoform 2 [Theobroma cacao]	gi|571465361|ref|XM_006583277.1|	1108	0	PREDICTED: Glycine max homeobox-leucine zipper protein ANTHOCYANINLESS 2-like (LOC100811873), transcript variant X2, mRNA	Q0WV12	1075	0	ANL2_ARATH Homeobox-leucine zipper protein ANTHOCYANINLESS 2 OS=Arabidopsis thaliana GN=ANL2 PE=2 SV=1	SPAC32A11.03c	52.4	7e-06	COG5576	Homeodomain-containing transcription factor	K09338	0	1025	aly:ARALYDRAFT_324546	homeobox-leucine zipper protein
CL1743.Contig1_All	15.1998	10.462	11.854	13.9064	1.8155	2.6731	13.5707	17.5256	10.1498	9.859	434.1	2e-149	PREDICTED: transcription factor bHLH79-like [Pyrus x bretschneideri]	gi|571461273|ref|XM_003527000.2|	480	1e-132	PREDICTED: Glycine max transcription factor bHLH79-like (LOC100777819), transcript variant X1, mRNA	Q9LV17	284	7e-93	BH079_ARATH Transcription factor bHLH79 OS=Arabidopsis thaliana GN=BHLH79 PE=2 SV=1	--	--	--	--	--	K12126	6e-13	72.4	ath:AT1G09530	phytochrome-interacting factor 3
CL1744.Contig3_All	3.6405	5.6611	5.4522	4.1317	1.014	0.7175	6.0103	5.8264	5.6783	5.5423	457.6	2e-151	hypothetical protein PHAVU_008G179500g [Phaseolus vulgaris] >gi|561014377|gb|ESW13238.1| hypothetical protein PHAVU_008G179500g [Phaseolus vulgaris]	gi|571511078|ref|XM_003544774.2|	291	2e-75	PREDICTED: Glycine max transcription factor SAC51-like (LOC100803342), mRNA	Q9FY69	108	3e-25	BH143_ARATH Transcription factor bHLH143 OS=Arabidopsis thaliana GN=BHLH143 PE=2 SV=1	--	--	--	--	--	--	--	--	--	--
CL1744.Contig5_All	3.7839	6.0728	5.1185	3.9776	0.8039	0.8634	7.0135	5.4916	5.4298	6.2711	460.3	5e-152	hypothetical protein PHAVU_008G179500g [Phaseolus vulgaris] >gi|561014377|gb|ESW13238.1| hypothetical protein PHAVU_008G179500g [Phaseolus vulgaris]	gi|571511078|ref|XM_003544774.2|	291	3e-75	PREDICTED: Glycine max transcription factor SAC51-like (LOC100803342), mRNA	Q9FY69	107	7e-25	BH143_ARATH Transcription factor bHLH143 OS=Arabidopsis thaliana GN=BHLH143 PE=2 SV=1	--	--	--	--	--	--	--	--	--	--
CL177.Contig1_All	11.2025	9.4397	0.4423	0.1297	0.0487	0	32.458	26.642	0.4355	2.6438	493.8	3e-170	PREDICTED: transcription factor bHLH57 [Glycine max] >gi|947099282|gb|KRH47774.1| hypothetical protein GLYMA_07G049100 [Glycine max]	gi|571524791|ref|XM_006598804.1|	276	9e-71	PREDICTED: Glycine max transcription factor bHLH70-like (LOC100783582), transcript variant X2, mRNA	Q700E4	278	1e-88	BH067_ARATH Transcription factor bHLH67 OS=Arabidopsis thaliana GN=BHLH67 PE=2 SV=1	--	--	--	--	--	K13422	3e-14	77.4	gmx:100790854	transcription factor MYC2
CL177.Contig2_All	0.7265	0.2682	0.1797	0	0.0791	0	3.9055	4.653	0	0.1432	492.3	1e-167	PREDICTED: transcription factor bHLH57 [Glycine max] >gi|947099282|gb|KRH47774.1| hypothetical protein GLYMA_07G049100 [Glycine max]	gi|571464916|ref|XM_003528713.2|	276	1e-70	PREDICTED: Glycine max transcription factor bHLH67-like (LOC100789928), mRNA	O81037	285	1e-89	BH070_ARATH Transcription factor bHLH70 OS=Arabidopsis thaliana GN=BHLH70 PE=2 SV=1	--	--	--	--	--	K13422	2e-15	82	ppp:PHYPADRAFT_164647	transcription factor MYC2
CL177.Contig3_All	1.0439	0.273	0	0	0	0	2.9918	2.6359	0.0515	0	476.9	7e-162	PREDICTED: transcription factor bHLH57-like isoform X1 [Vigna radiata var. radiata]	gi|571464916|ref|XM_003528713.2|	250	6e-63	PREDICTED: Glycine max transcription factor bHLH67-like (LOC100789928), mRNA	Q700E4	270	5e-84	BH067_ARATH Transcription factor bHLH67 OS=Arabidopsis thaliana GN=BHLH67 PE=2 SV=1	--	--	--	--	--	K13422	2e-15	81.3	osa:4349484	transcription factor MYC2
CL1796.Contig10_All	1.4251	3.5179	0.9488	1.8746	0.044	0.0441	3.0436	1.8442	2.1353	2.1757	574.7	0	hypothetical protein PHAVU_007G208400g [Phaseolus vulgaris] >gi|561018275|gb|ESW17079.1| hypothetical protein PHAVU_007G208400g [Phaseolus vulgaris]	gi|363808293|ref|NM_001255314.1|	440	1e-120	Glycine max MYB transcription factor MYB64 (MYB64), mRNA	Q8LPH6	254	6e-79	MYB86_ARATH Transcription factor MYB86 OS=Arabidopsis thaliana GN=MYB86 PE=2 SV=1	ECU11g1690	116	5e-29	COG5147	Myb superfamily proteins, including transcription factors and mRNA splicing factors	K09422	0	551	gmx:100782199	myb proto-oncogene protein, plant
CL1813.Contig5_All	0.4051	0.9746	1.0291	1.2489	0.5938	2.5063	0	0	0.639	0.5657	939.9	0	PREDICTED: U-box domain-containing protein 19-like [Citrus sinensis]	gi|566206624|ref|XM_002321548.2|	123	1e-24	Populus trichocarpa armadillo/beta-catenin repeat family protein (POPTR_0015s08550g) mRNA, complete cds	O80742	489	6e-162	PUB19_ARATH U-box domain-containing protein 19 OS=Arabidopsis thaliana GN=PUB19 PE=2 SV=1	--	--	--	--	--	K14431	3e-18	90.9	aly:ARALYDRAFT_311885	transcription factor TGA
CL1813.Contig6_All	2.2694	7.3174	9.2539	21.9053	5.9039	32.9327	0	0.037	6.526	4.7206	913.3	0	PREDICTED: U-box domain-containing protein 19-like [Citrus sinensis]	gi|566206624|ref|XM_002321548.2|	107	6e-20	Populus trichocarpa armadillo/beta-catenin repeat family protein (POPTR_0015s08550g) mRNA, complete cds	O80742	499	4e-167	PUB19_ARATH U-box domain-containing protein 19 OS=Arabidopsis thaliana GN=PUB19 PE=2 SV=1	--	--	--	--	--	K14431	5e-19	93.2	aly:ARALYDRAFT_311885	transcription factor TGA
CL1825.Contig2_All	1.1855	1.24	0.8604	0.6613	0.0523	0.0524	1.2766	1.4165	1.4357	0.8198	1005	0	PREDICTED: transcription factor EMB1444-like [Glycine max] >gi|947046019|gb|KRG95648.1| hypothetical protein GLYMA_19G163300 [Glycine max]	gi|571557886|ref|XM_003553441.2|	835	0	PREDICTED: Glycine max transcription factor EMB1444-like (LOC100798490), mRNA	Q58G01	493	9e-161	LHWL3_ARATH Transcription factor bHLH155 OS=Arabidopsis thaliana GN=BHLH155 PE=2 SV=1	--	--	--	--	--	K10863	6e-06	52	ath:AT5G01310	aprataxin [EC:3.-.-.-]
CL1825.Contig3_All	1.359	1.1016	0.8036	0.4539	0.131	0.0263	1.3339	1.6621	0.6698	1.1386	1005	0	PREDICTED: transcription factor EMB1444-like [Glycine max] >gi|947046019|gb|KRG95648.1| hypothetical protein GLYMA_19G163300 [Glycine max]	gi|571557886|ref|XM_003553441.2|	842	0	PREDICTED: Glycine max transcription factor EMB1444-like (LOC100798490), mRNA	Q58G01	492	2e-160	LHWL3_ARATH Transcription factor bHLH155 OS=Arabidopsis thaliana GN=BHLH155 PE=2 SV=1	--	--	--	--	--	K10863	6e-06	52	ath:AT5G01310	aprataxin [EC:3.-.-.-]
CL1825.Contig4_All	0.4951	0.5887	0.1644	0.0964	0.3618	0.0967	0.8594	1.2584	0.4316	0.3493	1010	0	PREDICTED: transcription factor EMB1444-like [Glycine max] >gi|947046019|gb|KRG95648.1| hypothetical protein GLYMA_19G163300 [Glycine max]	gi|571557886|ref|XM_003553441.2|	777	0	PREDICTED: Glycine max transcription factor EMB1444-like (LOC100798490), mRNA	P0C7P8	518	3e-169	LHWL1_ARATH Transcription factor EMB1444 OS=Arabidopsis thaliana GN=EMB1444 PE=2 SV=1	--	--	--	--	--	K10863	6e-06	52	ath:AT5G01310	aprataxin [EC:3.-.-.-]
CL1825.Contig7_All	2.7721	2.6957	1.9688	1.6938	0.3236	0.1159	2.8472	2.8139	1.8611	3.0408	279.3	6e-78	hypothetical protein LR48_Vigan02g136000 [Vigna angularis] >gi|965608840|dbj|BAT95331.1| hypothetical protein VIGAN_08203500 [Vigna angularis var. angularis]	gi|571557886|ref|XM_003553441.2|	850	0	PREDICTED: Glycine max transcription factor EMB1444-like (LOC100798490), mRNA	P0C7P8	353	1e-106	LHWL1_ARATH Transcription factor EMB1444 OS=Arabidopsis thaliana GN=EMB1444 PE=2 SV=1	--	--	--	--	--	K10863	7e-06	52	ath:AT5G01310	aprataxin [EC:3.-.-.-]
CL1827.Contig3_All	0	0.1535	0.4822	0.3017	0.0283	0.1135	0.0288	0.1158	0.615	0.9224	60.1	5e-07	transcription factor BIM2-like protein [Medicago truncatula] >gi|657390541|gb|KEH32062.1| transcription factor BIM2-like protein [Medicago truncatula]	gi|571534799|ref|XM_003549535.2|	442	1e-120	PREDICTED: Glycine max transcription factor BIM1-like (LOC100808016), mRNA	Q9LEZ3	265	4e-78	BIM1_ARATH Transcription factor BIM1 OS=Arabidopsis thaliana GN=BIM1 PE=1 SV=2	--	--	--	--	--	K12126	2e-06	53.1	aly:ARALYDRAFT_471048	phytochrome-interacting factor 3
CL1827.Contig4_All	0	0.0368	0.6162	0	0.1085	0.136	0	0.0278	0.6934	1.1133	235.7	9e-65	PREDICTED: transcription factor BIM1 [Cicer arietinum]	gi|571534799|ref|XM_003549535.2|	450	1e-123	PREDICTED: Glycine max transcription factor BIM1-like (LOC100808016), mRNA	Q9LEZ3	234	9e-67	BIM1_ARATH Transcription factor BIM1 OS=Arabidopsis thaliana GN=BIM1 PE=1 SV=2	--	--	--	--	--	--	--	--	--	--
CL1843.Contig5_All	0.3452	0.2599	0.2903	0.8939	0	0	1.0733	1.3727	0.4083	0.2699	118.6	1e-26	Putative transcription factor KAN2 [Glycine soja]	gi|502162401|ref|XM_004512433.1|	341	3e-90	PREDICTED: Cicer arietinum probable transcription factor KAN2-like (LOC101515506), transcript variant X2, mRNA	Q9C616	301	5e-94	KAN2_ARATH Probable transcription factor KAN2 OS=Arabidopsis thaliana GN=KAN2 PE=2 SV=1	--	--	--	--	--	K14491	1e-08	58.9	sbi:SORBI_01g019980	two-component response regulator ARR-B family
CL1843.Contig7_All	1.0717	0.6433	0.5877	0.5746	0	0	2.0633	2.4706	0.937	0.7287	540	0	PREDICTED: probable transcription factor KAN2 [Vigna radiata var. radiata]	gi|571478576|ref|XM_006587537.1|	557	1e-155	PREDICTED: Glycine max probable transcription factor KAN2-like (LOC100798081), mRNA	Q9C616	358	3e-118	KAN2_ARATH Probable transcription factor KAN2 OS=Arabidopsis thaliana GN=KAN2 PE=2 SV=1	--	--	--	--	--	K14491	8e-09	58.9	sbi:SORBI_01g019980	two-component response regulator ARR-B family
CL1870.Contig3_All	1.412	3.4046	0.0391	0.0916	0.0344	0.0345	3.9913	4.1165	0.3516	1.3283	893.3	0	hypothetical protein PHAVU_003G232600g [Phaseolus vulgaris] >gi|561029153|gb|ESW27793.1| hypothetical protein PHAVU_003G232600g [Phaseolus vulgaris]	gi|571455002|ref|XM_006579899.1|	791	0	PREDICTED: Glycine max AP2-like ethylene-responsive transcription factor ANT-like (LOC100787611), transcript variant X4, mRNA	Q38914	461	7e-154	ANT_ARATH AP2-like ethylene-responsive transcription factor ANT OS=Arabidopsis thaliana GN=ANT PE=1 SV=2	--	--	--	--	--	K09285	0	815	gmx:100787611	AP2-like factor, ANT lineage
CL1870.Contig50_All	0.8562	1.8055	0.144	0.0845	0	0.0318	1.2585	1.3944	0.2836	0.1913	60.5	4e-07	PREDICTED: AP2-like ethylene-responsive transcription factor ANT [Vigna radiata var. radiata]	gi|571455002|ref|XM_006579899.1|	448	1e-122	PREDICTED: Glycine max AP2-like ethylene-responsive transcription factor ANT-like (LOC100787611), transcript variant X4, mRNA	Q38914	260	1e-76	ANT_ARATH AP2-like ethylene-responsive transcription factor ANT OS=Arabidopsis thaliana GN=ANT PE=1 SV=2	--	--	--	--	--	K09285	4e-156	474	gmx:100787611	AP2-like factor, ANT lineage
CL1870.Contig54_All	2.0021	1.3303	1.1141	0.5083	0.0818	0.1366	2.5522	3.2338	1.01	1.184	59.7	1e-06	hypothetical protein PHAVU_003G232600g [Phaseolus vulgaris] >gi|561029153|gb|ESW27793.1| hypothetical protein PHAVU_003G232600g [Phaseolus vulgaris]	gi|571436123|ref|XM_006573612.1|	624	1e-175	PREDICTED: Glycine max AP2-like ethylene-responsive transcription factor ANT-like (LOC100812275), transcript variant X2, mRNA	Q38914	333	2e-102	ANT_ARATH AP2-like ethylene-responsive transcription factor ANT OS=Arabidopsis thaliana GN=ANT PE=1 SV=2	SPBC713.12	102	4e-22	COG0654	2-polyprenyl-6-methoxyphenol hydroxylase and related FAD-dependent oxidoreductases	K09285	2e-128	339	gmx:100787611	AP2-like factor, ANT lineage
CL1870.Contig56_All	3.221	8.2161	0	0	0.0321	0	7.3099	6.1325	0.4097	1.6637	62.8	9e-08	hypothetical protein PHAVU_003G232600g [Phaseolus vulgaris] >gi|561029153|gb|ESW27793.1| hypothetical protein PHAVU_003G232600g [Phaseolus vulgaris]	gi|571454998|ref|XM_006579897.1|	589	1e-165	PREDICTED: Glycine max AP2-like ethylene-responsive transcription factor ANT-like (LOC100787611), transcript variant X2, mRNA	Q38914	315	2e-128	ANT_ARATH AP2-like ethylene-responsive transcription factor ANT OS=Arabidopsis thaliana GN=ANT PE=1 SV=2	--	--	--	--	--	K09285	0	563	gmx:100787611	AP2-like factor, ANT lineage
CL1877.Contig2_All	4.0945	5.5197	1.3815	0.935	9.8733	8.6311	0.2381	0.2393	3.169	2.2587	167.9	3e-44	hypothetical protein VIGAN_01363000 [Vigna angularis var. angularis]	gi|571487280|ref|XM_003539189.2|	258	2e-65	PREDICTED: Glycine max homeobox-leucine zipper protein HAT22-like (LOC100795135), mRNA	P46604	169	8e-48	HAT22_ARATH Homeobox-leucine zipper protein HAT22 OS=Arabidopsis thaliana GN=HAT22 PE=1 SV=1	SPAC32A11.03c	51.2	6e-06	COG5576	Homeodomain-containing transcription factor	K09338	2e-47	169	ath:AT4G37790	homeobox-leucine zipper protein
CL1933.Contig60_All	0.7418	3.8573	3.7873	0.6534	0.6867	0.0983	0.1997	0.5017	4.0113	8.0499	63.9	7e-10	bZIP transcription factor bZIP77 [Glycine max]	gi|113367261|gb|DQ787079.1|	145	1e-31	Glycine max bZIP transcription factor bZIP77 (bZIP77) mRNA, partial cds	--	--	--	--	--	--	--	--	--	K09060	6e-06	48.5	gmx:100781875	plant G-box-binding factor
CL1947.Contig5_All	5.109	2.8321	1.2083	0.1575	0	0	1.0029	0.6047	0.3022	2.7585	72.8	1e-11	PREDICTED: transcription factor MYB57-like [Brassica rapa]	gi|359489282|ref|XM_002273436.2|	79.8	1e-11	PREDICTED: Vitis vinifera transcription factor MYB48-like (LOC100256500), mRNA	--	--	--	--	--	--	--	--	--	K09422	5e-12	68.9	vvi:100256500	myb proto-oncogene protein, plant
CL1947.Contig7_All	8.3341	5.2864	2.3549	0.3868	0	0	0.591	0.7212	0.424	2.7029	65.1	3e-11	hypothetical protein Csa_6G105150 [Cucumis sativus]	gi|359489282|ref|XM_002273436.2|	79.8	1e-11	PREDICTED: Vitis vinifera transcription factor MYB48-like (LOC100256500), mRNA	--	--	--	--	--	--	--	--	--	K09422	3e-11	66.6	vvi:100256500	myb proto-oncogene protein, plant
CL1983.Contig19_All	4.7125	4.2039	7.6144	3.3618	2.091	1.9878	11.7058	13.3859	7.9238	8.5272	1097.8	0	PREDICTED: uncharacterized protein LOC100806841 [Glycine max] >gi|571455169|ref|XP_006580010.1| PREDICTED: uncharacterized protein LOC100806841 [Glycine max] >gi|571455171|ref|XP_006580011.1| PREDICTED: uncharacterized protein LOC100806841 [Glycine max] >gi|947109995|gb|KRH58321.1| hypothetical protein GLYMA_05G120100 [Glycine max] >gi|947109996|gb|KRH58322.1| hypothetical protein GLYMA_05G120100…	gi|571470356|ref|XM_006584929.1|	1501	0	PREDICTED: Glycine max uncharacterized LOC102666151 (LOC102666151), mRNA	Q9SZ67	260	8e-73	WRK19_ARATH Probable WRKY transcription factor 19 OS=Arabidopsis thaliana GN=WRKY19 PE=2 SV=1	--	--	--	--	--	K14306	1e-06	53.5	rcu:RCOM_1609340	nuclear pore complex protein Nup62
CL1983.Contig4_All	1.4298	1.316	2.4381	1.2538	0.6471	0.4718	4.1014	4.1216	2.3678	3.1944	1095.9	0	PREDICTED: uncharacterized protein LOC102666151 [Glycine max] >gi|947093614|gb|KRH42199.1| hypothetical protein GLYMA_08G074900 [Glycine max]	gi|571470356|ref|XM_006584929.1|	1402	0	PREDICTED: Glycine max uncharacterized LOC102666151 (LOC102666151), mRNA	Q9SZ67	259	3e-71	WRK19_ARATH Probable WRKY transcription factor 19 OS=Arabidopsis thaliana GN=WRKY19 PE=2 SV=1	--	--	--	--	--	K14306	1e-06	54.3	rcu:RCOM_1609340	nuclear pore complex protein Nup62
CL1983.Contig7_All	0.1892	0.4354	0.3315	0.1167	0	0.0293	1.0102	0.7763	0.2238	0.317	1116.3	0	PREDICTED: uncharacterized protein LOC100806841 [Glycine max] >gi|571455169|ref|XP_006580010.1| PREDICTED: uncharacterized protein LOC100806841 [Glycine max] >gi|571455171|ref|XP_006580011.1| PREDICTED: uncharacterized protein LOC100806841 [Glycine max] >gi|947109995|gb|KRH58321.1| hypothetical protein GLYMA_05G120100 [Glycine max] >gi|947109996|gb|KRH58322.1| hypothetical protein GLYMA_05G120100…	gi|571455168|ref|XM_006579947.1|	1556	0	PREDICTED: Glycine max uncharacterized LOC100806841 (LOC100806841), transcript variant X2, mRNA	Q9SZ67	260	2e-71	WRK19_ARATH Probable WRKY transcription factor 19 OS=Arabidopsis thaliana GN=WRKY19 PE=2 SV=1	--	--	--	--	--	K14306	2e-06	53.5	rcu:RCOM_1609340	nuclear pore complex protein Nup62
CL1990.Contig11_All	12.7822	25.1447	15.3737	15.7621	5.9162	6.8812	8.1062	8.0685	46.7163	44.3008	836.6	0	hypothetical protein LR48_Vigan09g257800 [Vigna angularis]	gi|571500560|ref|XM_003543077.2|	315	1e-82	PREDICTED: Glycine max transcription factor GTE7-like (LOC100802622), mRNA	Q7Y214	392	1e-127	GTE7_ARATH Transcription factor GTE7 OS=Arabidopsis thaliana GN=GTE7 PE=2 SV=1	SPAC631.02	87.4	4e-17	COG5076	Transcription factor involved in chromatin remodeling, contains bromodomain	K11684	9e-75	251	sbi:SORBI_03g001920	bromodomain-containing factor 1
CL1990.Contig12_All	2.2267	2.9752	1.7869	3.9859	1.352	2.0441	1.8048	1.7456	6.5708	4.654	849.4	0	hypothetical protein LR48_Vigan09g257800 [Vigna angularis]	gi|571516345|ref|XM_003545701.2|	442	1e-120	PREDICTED: Glycine max transcription factor GTE7-like (LOC100776603), mRNA	Q7Y214	432	2e-137	GTE7_ARATH Transcription factor GTE7 OS=Arabidopsis thaliana GN=GTE7 PE=2 SV=1	YDL070w	89.7	2e-17	COG5076	Transcription factor involved in chromatin remodeling, contains bromodomain	K11684	8e-80	272	sbi:SORBI_03g001920	bromodomain-containing factor 1
CL1990.Contig13_All	1.8219	3.694	2.4749	1.8319	0.5449	1.4046	1.1884	1.672	9.3168	8.5481	852.4	0	hypothetical protein LR48_Vigan09g257800 [Vigna angularis]	gi|571516345|ref|XM_003545701.2|	442	1e-120	PREDICTED: Glycine max transcription factor GTE7-like (LOC100776603), mRNA	Q7Y214	435	4e-140	GTE7_ARATH Transcription factor GTE7 OS=Arabidopsis thaliana GN=GTE7 PE=2 SV=1	YDL070w	89.7	1e-17	COG5076	Transcription factor involved in chromatin remodeling, contains bromodomain	K11684	2e-80	272	sbi:SORBI_03g001920	bromodomain-containing factor 1
CL1990.Contig14_All	1.3851	2.4879	1.8576	2.6799	0.9064	0.5097	1.2826	1.1306	4.9718	3.7349	849.4	0	hypothetical protein LR48_Vigan09g257800 [Vigna angularis]	gi|571516345|ref|XM_003545701.2|	442	1e-120	PREDICTED: Glycine max transcription factor GTE7-like (LOC100776603), mRNA	Q7Y214	432	3e-137	GTE7_ARATH Transcription factor GTE7 OS=Arabidopsis thaliana GN=GTE7 PE=2 SV=1	YDL070w	89.7	2e-17	COG5076	Transcription factor involved in chromatin remodeling, contains bromodomain	K11684	8e-80	272	sbi:SORBI_03g001920	bromodomain-containing factor 1
CL1990.Contig2_All	0.7711	1.6453	1.3374	1.046	0.1785	0.4651	0.7629	0.5476	3.3749	2.9287	834.3	0	hypothetical protein LR48_Vigan09g257800 [Vigna angularis]	gi|502077369|ref|XM_004485576.1|	337	4e-89	PREDICTED: Cicer arietinum transcription factor GTE7-like (LOC101502682), transcript variant X2, mRNA	Q7Y214	387	5e-125	GTE7_ARATH Transcription factor GTE7 OS=Arabidopsis thaliana GN=GTE7 PE=2 SV=1	SPAC631.02	90.5	5e-18	COG5076	Transcription factor involved in chromatin remodeling, contains bromodomain	K11684	4e-74	250	sbi:SORBI_03g001920	bromodomain-containing factor 1
CL1990.Contig3_All	1.6844	2.7749	1.5216	2.1745	0.5604	0.7327	0.9671	1.4952	4.4831	3.7633	828.2	0	hypothetical protein LR48_Vigan09g257800 [Vigna angularis]	gi|571516348|ref|XM_003545698.2|	335	2e-88	PREDICTED: Glycine max transcription factor GTE7-like (LOC100819363), mRNA	Q7Y214	413	3e-131	GTE7_ARATH Transcription factor GTE7 OS=Arabidopsis thaliana GN=GTE7 PE=2 SV=1	SPAC631.02	86.3	2e-16	COG5076	Transcription factor involved in chromatin remodeling, contains bromodomain	K11684	2e-76	262	sbi:SORBI_03g001920	bromodomain-containing factor 1
CL1990.Contig5_All	0.1704	0.5805	0.4605	0.6003	0.1577	0.1355	0.0688	0.1844	1.1517	0.9789	849.4	0	hypothetical protein LR48_Vigan09g257800 [Vigna angularis]	gi|571516345|ref|XM_003545701.2|	442	1e-120	PREDICTED: Glycine max transcription factor GTE7-like (LOC100776603), mRNA	Q7Y214	432	2e-137	GTE7_ARATH Transcription factor GTE7 OS=Arabidopsis thaliana GN=GTE7 PE=2 SV=1	YDL070w	89.7	2e-17	COG5076	Transcription factor involved in chromatin remodeling, contains bromodomain	K11684	7e-80	272	sbi:SORBI_03g001920	bromodomain-containing factor 1
CL1990.Contig6_All	1.5664	3.0219	2.0734	3.7559	1.3426	1.1844	1.6125	2.005	6.5537	5.379	849.4	0	hypothetical protein LR48_Vigan09g257800 [Vigna angularis]	gi|571516345|ref|XM_003545701.2|	442	1e-120	PREDICTED: Glycine max transcription factor GTE7-like (LOC100776603), mRNA	Q7Y214	432	2e-139	GTE7_ARATH Transcription factor GTE7 OS=Arabidopsis thaliana GN=GTE7 PE=2 SV=1	YDL070w	89.7	1e-17	COG5076	Transcription factor involved in chromatin remodeling, contains bromodomain	K11684	1e-80	272	sbi:SORBI_03g001920	bromodomain-containing factor 1
CL1990.Contig7_All	10.8577	20.5741	13.7054	16.1073	5.5573	5.4622	6.5403	6.4392	35.6175	35.0246	850.5	0	hypothetical protein LR48_Vigan09g257800 [Vigna angularis]	gi|502077369|ref|XM_004485576.1|	396	1e-107	PREDICTED: Cicer arietinum transcription factor GTE7-like (LOC101502682), transcript variant X2, mRNA	Q7Y214	402	4e-126	GTE7_ARATH Transcription factor GTE7 OS=Arabidopsis thaliana GN=GTE7 PE=2 SV=1	SPAC631.02	95.5	3e-19	COG5076	Transcription factor involved in chromatin remodeling, contains bromodomain	K11684	2e-73	254	sbi:SORBI_03g001920	bromodomain-containing factor 1
CL1990.Contig8_All	0.7996	1.309	1.1694	1.0718	0.3218	2.0325	0.5241	0.6913	2.5496	2.5632	276.9	5e-81	PREDICTED: transcription factor GTE7 [Glycine max] >gi|947072811|gb|KRH21702.1| hypothetical protein GLYMA_13G254500 [Glycine max] >gi|947072812|gb|KRH21703.1| hypothetical protein GLYMA_13G254500 [Glycine max]	gi|502077369|ref|XM_004485576.1|	266	1e-67	PREDICTED: Cicer arietinum transcription factor GTE7-like (LOC101502682), transcript variant X2, mRNA	Q7Y214	162	8e-42	GTE7_ARATH Transcription factor GTE7 OS=Arabidopsis thaliana GN=GTE7 PE=2 SV=1	--	--	--	--	--	K11684	4e-18	89.7	sbi:SORBI_03g001920	bromodomain-containing factor 1
CL200.Contig12_All	1.0281	1.0701	0.3426	0.6184	1.3231	2.5363	0.5907	0.5461	1.2754	0.7843	128.6	1e-28	PREDICTED: transcription factor bHLH49-like isoform X2 [Glycine max]	gi|571434396|ref|XM_006573122.1|	492	1e-135	PREDICTED: Glycine max transcription factor bHLH49-like (LOC100797720), transcript variant X3, mRNA	Q9CAA9	244	3e-70	BH049_ARATH Transcription factor bHLH49 OS=Arabidopsis thaliana GN=BHLH49 PE=1 SV=1	--	--	--	--	--	K09272	6e-06	52	vvi:100249277	structure-specific recognition protein 1
CL200.Contig14_All	4.092	3.852	3.2954	2.4823	0.7026	1.0106	6.4674	5.9368	6.0115	5.3453	256.9	0	Transcription factor bHLH49 [Glycine soja]	gi|571434396|ref|XM_006573122.1|	440	1e-120	PREDICTED: Glycine max transcription factor bHLH49-like (LOC100797720), transcript variant X3, mRNA	Q9CAA9	239	7e-96	BH049_ARATH Transcription factor bHLH49 OS=Arabidopsis thaliana GN=BHLH49 PE=1 SV=1	--	--	--	--	--	K12126	9e-09	48.5	ath:AT1G09530	phytochrome-interacting factor 3
CL200.Contig16_All	0.2861	0.7182	0.6015	0.3969	0.1986	0.2987	0.2696	0.0339	1.4806	1.1186	746.5	0	Transcription factor bHLH49 [Glycine soja]	gi|571434396|ref|XM_006573122.1|	728	0	PREDICTED: Glycine max transcription factor bHLH49-like (LOC100797720), transcript variant X3, mRNA	Q9CAA9	336	3e-106	BH049_ARATH Transcription factor bHLH49 OS=Arabidopsis thaliana GN=BHLH49 PE=1 SV=1	--	--	--	--	--	K12126	1e-11	69.7	ath:AT1G09530	phytochrome-interacting factor 3
CL200.Contig20_All	1.4345	1.0803	0.4935	0.9327	1.7142	2.4445	0.8601	0.5927	1.6968	1.1363	692.2	0	PREDICTED: transcription factor bHLH49-like isoform X2 [Glycine max]	gi|571434396|ref|XM_006573122.1|	777	0	PREDICTED: Glycine max transcription factor bHLH49-like (LOC100797720), transcript variant X3, mRNA	Q9CAA9	340	3e-105	BH049_ARATH Transcription factor bHLH49 OS=Arabidopsis thaliana GN=BHLH49 PE=1 SV=1	--	--	--	--	--	K12126	2e-11	69.7	ath:AT1G09530	phytochrome-interacting factor 3
CL2043.Contig1_All	32.9845	89.6615	138.398	89.1016	38.0405	90.3892	17.5996	17.0823	93.9853	103.211	171	3e-48	hypothetical protein PHAVU_009G029600g [Phaseolus vulgaris] >gi|561009320|gb|ESW08227.1| hypothetical protein PHAVU_009G029600g [Phaseolus vulgaris]	gi|571459888|ref|XM_003526539.2|	174	1e-40	PREDICTED: Glycine max ethylene-responsive transcription factor RAP2-4-like (LOC100800478), mRNA	Q8H1E4	72.4	4e-14	RAP24_ARATH Ethylene-responsive transcription factor RAP2-4 OS=Arabidopsis thaliana GN=RAP2-4 PE=1 SV=1	--	--	--	--	--	K09286	6e-34	129	vvi:100245515	EREBP-like factor
CL2043.Contig2_All	209.213	313.996	380.542	388.917	190.699	263.496	99.1524	84.4254	315.508	268.793	488.8	1e-164	hypothetical protein PHAVU_009G029600g [Phaseolus vulgaris] >gi|561009320|gb|ESW08227.1| hypothetical protein PHAVU_009G029600g [Phaseolus vulgaris]	gi|359492842|ref|XM_002285766.2|	252	2e-63	PREDICTED: Vitis vinifera ethylene-responsive transcription factor RAP2-4-like, transcript variant 1 (LOC100245515), mRNA	Q8H1E4	323	4e-103	RAP24_ARATH Ethylene-responsive transcription factor RAP2-4 OS=Arabidopsis thaliana GN=RAP2-4 PE=1 SV=1	--	--	--	--	--	K09286	1e-133	405	vvi:100245515	EREBP-like factor
CL2080.Contig10_All	0.3362	0.422	0.3534	0.2638	0	0.0284	2.5054	2.0836	0.1808	0.4097	216.9	0	PREDICTED: transcription factor EMB1444-like isoform X1 [Glycine max] >gi|955331050|ref|XP_014633473.1| PREDICTED: transcription factor EMB1444-like isoform X1 [Glycine max] >gi|947100669|gb|KRH49161.1| hypothetical protein GLYMA_07G136600 [Glycine max] >gi|947100670|gb|KRH49162.1| hypothetical protein GLYMA_07G136600 [Glycine max]	gi|571468397|ref|XR_415339.1|	258	4e-65	PREDICTED: Glycine max transcription factor EMB1444-like (LOC100820605), misc_RNA	P0C7P8	186	8e-49	LHWL1_ARATH Transcription factor EMB1444 OS=Arabidopsis thaliana GN=EMB1444 PE=2 SV=1	--	--	--	--	--	--	--	--	--	--
CL2080.Contig13_All	0.2291	0.2516	0.0903	0.0353	0	0	1.619	0.9762	0.0339	0.192	731.1	0	PREDICTED: transcription factor EMB1444-like isoform X1 [Glycine max] >gi|955331050|ref|XP_014633473.1| PREDICTED: transcription factor EMB1444-like isoform X1 [Glycine max] >gi|947100669|gb|KRH49161.1| hypothetical protein GLYMA_07G136600 [Glycine max] >gi|947100670|gb|KRH49162.1| hypothetical protein GLYMA_07G136600 [Glycine max]	gi|502179449|ref|XM_004516376.1|	266	2e-67	PREDICTED: Cicer arietinum transcription factor bHLH155-like (LOC101514680), mRNA	Q9XIN0	237	1e-66	LHW_ARATH Transcription factor LHW OS=Arabidopsis thaliana GN=LHW PE=1 SV=1	--	--	--	--	--	--	--	--	--	--
CL2080.Contig4_All	0.0268	0.101	0.1128	0	0	0	0.6573	0.686	0	0.2997	216.9	0	PREDICTED: transcription factor EMB1444-like isoform X1 [Glycine max] >gi|955331050|ref|XP_014633473.1| PREDICTED: transcription factor EMB1444-like isoform X1 [Glycine max] >gi|947100669|gb|KRH49161.1| hypothetical protein GLYMA_07G136600 [Glycine max] >gi|947100670|gb|KRH49162.1| hypothetical protein GLYMA_07G136600 [Glycine max]	gi|571468397|ref|XR_415339.1|	258	4e-65	PREDICTED: Glycine max transcription factor EMB1444-like (LOC100820605), misc_RNA	P0C7P8	186	1e-48	LHWL1_ARATH Transcription factor EMB1444 OS=Arabidopsis thaliana GN=EMB1444 PE=2 SV=1	--	--	--	--	--	--	--	--	--	--
CL2144.Contig1_All	4.1351	2.4097	1.0867	0.5463	0	0	6.6791	6.5022	1.6596	1.9797	204.1	7e-60	unnamed protein product [Vitis vinifera]	gi|571452313|ref|XM_006578940.1|	83.8	5e-13	PREDICTED: Glycine max B3 domain-containing transcription factor VRN1-like (LOC100800609), transcript variant X3, mRNA	Q8L3W1	174	7e-51	VRN1_ARATH B3 domain-containing transcription factor VRN1 OS=Arabidopsis thaliana GN=VRN1 PE=1 SV=1	--	--	--	--	--	--	--	--	--	--
CL2144.Contig3_All	1.7842	0.7465	0.0625	0.0733	0	0.1104	5.6596	5.969	0.2814	0.1993	56.2	4e-06	PREDICTED: putative B3 domain-containing protein Os03g0621600 [Vitis vinifera]	gi|571452313|ref|XM_006578940.1|	109	1e-20	PREDICTED: Glycine max B3 domain-containing transcription factor VRN1-like (LOC100800609), transcript variant X3, mRNA	Q8L3W1	159	5e-44	VRN1_ARATH B3 domain-containing transcription factor VRN1 OS=Arabidopsis thaliana GN=VRN1 PE=1 SV=1	--	--	--	--	--	--	--	--	--	--
CL2144.Contig4_All	2.5624	0.9089	0	0.2061	0	0	2.5193	3.0591	0.593	0.6223	209.5	5e-61	hypothetical protein PHAVU_005G000700g [Phaseolus vulgaris] >gi|561021870|gb|ESW20600.1| hypothetical protein PHAVU_005G000700g [Phaseolus vulgaris]	gi|571452313|ref|XM_006578940.1|	77.8	4e-11	PREDICTED: Glycine max B3 domain-containing transcription factor VRN1-like (LOC100800609), transcript variant X3, mRNA	Q8L3W1	181	3e-52	VRN1_ARATH B3 domain-containing transcription factor VRN1 OS=Arabidopsis thaliana GN=VRN1 PE=1 SV=1	--	--	--	--	--	--	--	--	--	--
CL2144.Contig5_All	1.3369	0.3648	0	0	0	0	2.574	4.1827	0.1375	0.5844	206.8	3e-60	hypothetical protein PHAVU_005G000700g [Phaseolus vulgaris] >gi|561021870|gb|ESW20600.1| hypothetical protein PHAVU_005G000700g [Phaseolus vulgaris]	gi|571452313|ref|XM_006578940.1|	109	1e-20	PREDICTED: Glycine max B3 domain-containing transcription factor VRN1-like (LOC100800609), transcript variant X3, mRNA	Q8L3W1	110	1e-26	VRN1_ARATH B3 domain-containing transcription factor VRN1 OS=Arabidopsis thaliana GN=VRN1 PE=1 SV=1	--	--	--	--	--	--	--	--	--	--
CL2144.Contig6_All	0.3369	0.1691	0.0708	0	0	0	1.3966	1.531	0.3188	0.2258	193.7	5e-56	PREDICTED: B3 domain-containing protein At4g01580-like [Vigna radiata var. radiata]	gi|571452313|ref|XM_006578940.1|	83.8	5e-13	PREDICTED: Glycine max B3 domain-containing transcription factor VRN1-like (LOC100800609), transcript variant X3, mRNA	Q8L3W1	114	5e-28	VRN1_ARATH B3 domain-containing transcription factor VRN1 OS=Arabidopsis thaliana GN=VRN1 PE=1 SV=1	--	--	--	--	--	--	--	--	--	--
CL2144.Contig7_All	4.6178	1.2274	0.2855	0.067	0	0	5.0164	4.8353	0.1928	0.6069	218	2e-63	PREDICTED: B3 domain-containing transcription factor VRN1-like [Vitis vinifera]	gi|571452312|ref|XM_003522558.2|	91.7	3e-15	PREDICTED: Glycine max B3 domain-containing transcription factor VRN1-like (LOC100800609), transcript variant X1, mRNA	Q8L3W1	188	1e-54	VRN1_ARATH B3 domain-containing transcription factor VRN1 OS=Arabidopsis thaliana GN=VRN1 PE=1 SV=1	--	--	--	--	--	--	--	--	--	--
CL2144.Contig9_All	3.1636	0	0	0	0	0	4.3835	3.8764	0	0	87	1e-19	PREDICTED: B3 domain-containing protein REM19 [Vitis vinifera]	--	--	--	--	Q8L3W1	64.3	1e-12	VRN1_ARATH B3 domain-containing transcription factor VRN1 OS=Arabidopsis thaliana GN=VRN1 PE=1 SV=1	--	--	--	--	--	--	--	--	--	--
CL2210.Contig1_All	4.8825	11.5754	4.0731	1.6246	0.287	0.1438	0.2921	0.5137	7.6089	6.8393	215.7	3e-65	hypothetical protein GLYMA_15G139000 [Glycine max] >gi|947062659|gb|KRH11920.1| hypothetical protein GLYMA_15G139000 [Glycine max]	gi|571518453|ref|XM_003547306.2|	228	1e-56	PREDICTED: Glycine max probable WRKY transcription factor 48-like (LOC100812252), mRNA	O22900	135	2e-36	WRK23_ARATH Probable WRKY transcription factor 23 OS=Arabidopsis thaliana GN=WRKY23 PE=2 SV=1	--	--	--	--	--	K13424	8e-15	77.4	vvi:100243352	WRKY transcription factor 33
CL2210.Contig2_All	2.1126	9.5964	11.3149	7.6294	8.5676	16.3373	1.2796	0.9049	5.1765	9.1028	128.6	2e-30	hypothetical protein GLYMA_15G139000 [Glycine max]	gi|571518453|ref|XM_003547306.2|	216	7e-53	PREDICTED: Glycine max probable WRKY transcription factor 48-like (LOC100812252), mRNA	Q9FGZ4	117	3e-47	WRK48_ARATH Probable WRKY transcription factor 48 OS=Arabidopsis thaliana GN=WRKY48 PE=2 SV=1	--	--	--	--	--	K13424	4e-22	64.7	sbi:SORBI_09g023270	WRKY transcription factor 33
CL2210.Contig4_All	5.5921	16.5973	6.0855	4.0563	0.3045	0.5495	0.3719	0.0623	9.3385	9.1865	364.4	4e-121	PREDICTED: probable WRKY transcription factor 48 [Glycine max] >gi|955332264|ref|XP_014633692.1| PREDICTED: probable WRKY transcription factor 48 [Glycine max] >gi|947102210|gb|KRH50702.1| hypothetical protein GLYMA_07G238000 [Glycine max] >gi|947102211|gb|KRH50703.1| hypothetical protein GLYMA_07G238000 [Glycine max] >gi|947102212|gb|KRH50704.1| hypothetical protein GLYMA_07G238000 [Glycine max]…	gi|571518453|ref|XM_003547306.2|	313	3e-82	PREDICTED: Glycine max probable WRKY transcription factor 48-like (LOC100812252), mRNA	Q9FGZ4	239	1e-74	WRK48_ARATH Probable WRKY transcription factor 48 OS=Arabidopsis thaliana GN=WRKY48 PE=2 SV=1	--	--	--	--	--	K13424	8e-35	137	zma:100281160	WRKY transcription factor 33
CL2210.Contig5_All	3.8945	11.5726	10.0066	13.5863	15.2215	24.2167	2.4776	1.5758	6.536	8.6637	392.5	2e-126	PREDICTED: probable WRKY transcription factor 48 [Glycine max] >gi|955332264|ref|XP_014633692.1| PREDICTED: probable WRKY transcription factor 48 [Glycine max] >gi|947102210|gb|KRH50702.1| hypothetical protein GLYMA_07G238000 [Glycine max] >gi|947102211|gb|KRH50703.1| hypothetical protein GLYMA_07G238000 [Glycine max] >gi|947102212|gb|KRH50704.1| hypothetical protein GLYMA_07G238000 [Glycine max]…	gi|571518453|ref|XM_003547306.2|	363	8e-97	PREDICTED: Glycine max probable WRKY transcription factor 48-like (LOC100812252), mRNA	Q9FGZ4	258	2e-77	WRK48_ARATH Probable WRKY transcription factor 48 OS=Arabidopsis thaliana GN=WRKY48 PE=2 SV=1	--	--	--	--	--	K13424	4e-30	127	zma:100281558	WRKY transcription factor 33
CL2224.Contig5_All	5.4248	5.0436	3.0412	0.9415	0.2232	1.0814	9.5411	10.9578	2.4242	4.3542	1021.9	0	PREDICTED: U-box domain-containing protein 11 [Vigna radiata var. radiata]	gi|571563450|ref|XM_003555841.2|	1556	0	PREDICTED: Glycine max U-box domain-containing protein 10-like (LOC100811123), mRNA	Q9C9A6	713	0	PUB10_ARATH U-box domain-containing protein 10 OS=Arabidopsis thaliana GN=PUB10 PE=2 SV=1	YNL189w	62.8	2e-09	COG5064	Karyopherin (importin) alpha	K14431	9e-28	120	aly:ARALYDRAFT_311885	transcription factor TGA
CL2268.Contig3_All	0	1.8158	0.6083	1.0704	7.7676	4.0276	0.8179	0.8219	1.0268	1.2929	35.8	8e-10	hypothetical protein VITISV_043874 [Vitis vinifera]	gi|357463690|ref|XM_003602079.1|	77.8	7e-12	Medicago truncatula Global transcription factor group (MTR_3g089910) mRNA, complete cds	--	--	--	--	--	--	--	--	--	K15172	9e-08	49.7	vvi:100267652	transcription elongation factor SPT5
CL231.Contig1_All	0.4048	0.2178	0.3647	0	7.8698	6.0108	0.1635	0.4928	0.3421	0.2584	408.7	1e-139	shatterproof [Medicago monspeliaca]	gi|60100355|gb|AY770404.1|	571	1e-159	Lotus corniculatus var. japonicus MADS box protein AGL1 mRNA, partial cds	P29385	323	2e-108	AGL5_ARATH Agamous-like MADS-box protein AGL5 OS=Arabidopsis thaliana GN=AGL5 PE=1 SV=1	YMR042w	64.7	2e-11	COG5068	Regulator of arginine metabolism and related MADS box-containing transcription factors	K09264	2e-139	403	gmx:100782733	MADS-box transcription factor, plant
CL231.Contig2_All	1.0199	0.7681	11.0423	0.3773	10.1022	7.193	0.4805	0.0966	2.4129	1.0254	59.7	4e-09	PREDICTED: agamous-like MADS-box protein AGL5 isoform X4 [Glycine max] >gi|955363425|ref|XP_014622401.1| PREDICTED: agamous-like MADS-box protein AGL5 isoform X4 [Glycine max]	gi|224923090|gb|AC235326.1|	137	3e-29	Glycine max strain Williams 82 clone GM_WBb0080M03, complete sequence	P29385	47.4	4e-06	AGL5_ARATH Agamous-like MADS-box protein AGL5 OS=Arabidopsis thaliana GN=AGL5 PE=1 SV=1	--	--	--	--	--	K09264	8e-08	53.5	gmx:100782733	MADS-box transcription factor, plant
CL231.Contig3_All	0.5267	0.0826	0.9688	0	1.4627	1.3441	3.0395	2.3065	0.3115	0.0735	408.7	1e-140	shatterproof [Medicago monspeliaca]	gi|60100355|gb|AY770404.1|	571	1e-160	Lotus corniculatus var. japonicus MADS box protein AGL1 mRNA, partial cds	P29385	323	2e-109	AGL5_ARATH Agamous-like MADS-box protein AGL5 OS=Arabidopsis thaliana GN=AGL5 PE=1 SV=1	YPL089c	68.6	1e-11	COG5068	Regulator of arginine metabolism and related MADS box-containing transcription factors	K09264	2e-140	403	gmx:100782733	MADS-box transcription factor, plant
CL231.Contig5_All	2.6688	1.3072	2.1895	0.0803	8.5564	5.2552	0.552	0.1849	3.2339	1.5997	408.7	1e-140	shatterproof [Medicago monspeliaca]	gi|60100355|gb|AY770404.1|	571	1e-160	Lotus corniculatus var. japonicus MADS box protein AGL1 mRNA, partial cds	P29385	323	3e-109	AGL5_ARATH Agamous-like MADS-box protein AGL5 OS=Arabidopsis thaliana GN=AGL5 PE=1 SV=1	YPL089c	68.6	1e-11	COG5068	Regulator of arginine metabolism and related MADS box-containing transcription factors	K09264	3e-140	403	gmx:100782733	MADS-box transcription factor, plant
CL231.Contig6_All	5.0031	2.4065	2.4248	0.2586	12.5905	10.5643	1.3549	1.1914	8.1152	2.9785	283.5	5e-87	hypothetical protein GLYMA_02G287700 [Glycine max]	gi|60100355|gb|AY770404.1|	442	1e-120	Lotus corniculatus var. japonicus MADS box protein AGL1 mRNA, partial cds	P29385	246	2e-74	AGL5_ARATH Agamous-like MADS-box protein AGL5 OS=Arabidopsis thaliana GN=AGL5 PE=1 SV=1	YMR042w	64.7	3e-11	COG5068	Regulator of arginine metabolism and related MADS box-containing transcription factors	K09264	6e-88	283	gmx:100782733	MADS-box transcription factor, plant
CL2387.Contig11_All	0.9905	5.0505	2.733	2.1375	0.0573	0.2298	0.6416	0.5862	2.6362	3.1811	341.3	2e-109	uncharacterized protein LOC100794925 [Glycine max] >gi|564010299|gb|AHB63577.1| NAC transcription factor [Glycine max]	gi|566006160|ref|NM_001287446.1|	268	2e-68	Glycine max NAC transcription factor (SNAC38), mRNA >gi|564010298|gb|KF657305.1| Glycine max NAC transcription factor (SNAC38) mRNA, complete cds	Q9XIC5	121	2e-29	NAC17_ARATH NAC domain-containing protein 17 OS=Arabidopsis thaliana GN=NAC017 PE=2 SV=1	--	--	--	--	--	--	--	--	--	--
CL2387.Contig12_All	0.1474	0.7862	0.8521	0.7724	0.0341	0.171	0	0.0349	0.6974	1.0702	739.6	0	uncharacterized protein LOC100794925 [Glycine max] >gi|564010299|gb|AHB63577.1| NAC transcription factor [Glycine max]	gi|571568219|ref|XM_006606130.1|	513	1e-142	PREDICTED: Glycine max uncharacterized LOC100787232 (LOC100787232), transcript variant X2, mRNA	Q9XIC5	421	4e-138	NAC17_ARATH NAC domain-containing protein 17 OS=Arabidopsis thaliana GN=NAC017 PE=2 SV=1	--	--	--	--	--	--	--	--	--	--
CL2387.Contig13_All	0.0694	0.7401	0.9115	0.5133	0.1284	0.0966	0.098	0.0985	0.6565	1.2012	135.6	5e-31	uncharacterized protein LOC100794925 [Glycine max] >gi|564010299|gb|AHB63577.1| NAC transcription factor [Glycine max]	gi|571568219|ref|XM_006606130.1|	509	1e-141	PREDICTED: Glycine max uncharacterized LOC100787232 (LOC100787232), transcript variant X2, mRNA	Q9XIC5	302	7e-111	NAC17_ARATH NAC domain-containing protein 17 OS=Arabidopsis thaliana GN=NAC017 PE=2 SV=1	--	--	--	--	--	--	--	--	--	--
CL2387.Contig1_All	2.7794	11.2836	10.7482	8.4625	0.6035	0.7642	1.6165	1.592	7.2653	13.339	729.6	0	uncharacterized protein LOC100794925 [Glycine max] >gi|564010299|gb|AHB63577.1| NAC transcription factor [Glycine max]	gi|571568219|ref|XM_006606130.1|	505	1e-140	PREDICTED: Glycine max uncharacterized LOC100787232 (LOC100787232), transcript variant X2, mRNA	Q9XIC5	412	4e-134	NAC17_ARATH NAC domain-containing protein 17 OS=Arabidopsis thaliana GN=NAC017 PE=2 SV=1	--	--	--	--	--	--	--	--	--	--
CL2387.Contig2_All	0.3515	0.9706	1.1084	0.9536	0.1952	0.0326	0.0331	0.1997	0.6237	1.1387	740	0	uncharacterized protein LOC100794925 [Glycine max] >gi|564010299|gb|AHB63577.1| NAC transcription factor [Glycine max]	gi|571568219|ref|XM_006606130.1|	507	1e-140	PREDICTED: Glycine max uncharacterized LOC100787232 (LOC100787232), transcript variant X2, mRNA	Q9XIC5	436	2e-143	NAC17_ARATH NAC domain-containing protein 17 OS=Arabidopsis thaliana GN=NAC017 PE=2 SV=1	--	--	--	--	--	--	--	--	--	--
CL2387.Contig3_All	0.4617	2.8492	1.6582	0.7591	0.0712	0.0357	0.0363	0.0729	2.5031	2.063	211.1	4e-58	hypothetical protein GLYMA_20G172100 [Glycine max]	gi|566006160|ref|NM_001287446.1|	192	1e-45	Glycine max NAC transcription factor (SNAC38), mRNA >gi|564010298|gb|KF657305.1| Glycine max NAC transcription factor (SNAC38) mRNA, complete cds	Q9XIC5	74.7	1e-13	NAC17_ARATH NAC domain-containing protein 17 OS=Arabidopsis thaliana GN=NAC017 PE=2 SV=1	--	--	--	--	--	--	--	--	--	--
CL2387.Contig4_All	1.1321	4.0679	4.3168	4.7357	1.048	1.2978	0.2719	0.2732	4.4114	5.0835	135.6	0	uncharacterized protein LOC100794925 [Glycine max] >gi|564010299|gb|AHB63577.1| NAC transcription factor [Glycine max]	gi|571568219|ref|XM_006606130.1|	511	1e-141	PREDICTED: Glycine max uncharacterized LOC100787232 (LOC100787232), transcript variant X2, mRNA	Q9XIC5	321	2e-116	NAC17_ARATH NAC domain-containing protein 17 OS=Arabidopsis thaliana GN=NAC017 PE=2 SV=1	--	--	--	--	--	--	--	--	--	--
CL2387.Contig7_All	0.765	2.1125	2.0908	1.4623	0.1062	0.2485	0.5046	0.3984	2.6696	3.5894	747.3	0	uncharacterized protein LOC100794925 [Glycine max] >gi|564010299|gb|AHB63577.1| NAC transcription factor [Glycine max]	gi|571568219|ref|XM_006606130.1|	513	1e-142	PREDICTED: Glycine max uncharacterized LOC100787232 (LOC100787232), transcript variant X2, mRNA	Q9XIC5	423	2e-139	NAC17_ARATH NAC domain-containing protein 17 OS=Arabidopsis thaliana GN=NAC017 PE=2 SV=1	--	--	--	--	--	--	--	--	--	--
CL2387.Contig8_All	2.8561	10.667	11.7525	12.6706	3.321	3.5231	1.2143	0.6596	8.7346	9.8829	740.7	0	uncharacterized protein LOC100794925 [Glycine max] >gi|564010299|gb|AHB63577.1| NAC transcription factor [Glycine max]	gi|571568219|ref|XM_006606130.1|	515	1e-143	PREDICTED: Glycine max uncharacterized LOC100787232 (LOC100787232), transcript variant X2, mRNA	Q9XIC5	426	2e-139	NAC17_ARATH NAC domain-containing protein 17 OS=Arabidopsis thaliana GN=NAC017 PE=2 SV=1	--	--	--	--	--	--	--	--	--	--
CL2389.Contig8_All	2.2946	2.5961	1.3589	3.5071	6.0433	3.1191	1.3398	1.1934	3.3259	2.816	403.3	7e-131	PREDICTED: transcription factor SAC51-like [Glycine max] >gi|947061326|gb|KRH10587.1| hypothetical protein GLYMA_15G056600 [Glycine max]	gi|571516227|ref|XM_006597296.1|	311	3e-81	PREDICTED: Glycine max uncharacterized LOC100778385 (LOC100778385), mRNA	Q9FY69	129	1e-32	BH143_ARATH Transcription factor bHLH143 OS=Arabidopsis thaliana GN=BHLH143 PE=2 SV=1	--	--	--	--	--	--	--	--	--	--
CL2393.Contig1_All	0.1207	0.303	0	0	0.4842	0.6721	0.0379	0.2667	0.0476	0.1798	478	3e-162	PREDICTED: transcription factor bHLH121 [Cucumis sativus] >gi|700193711|gb|KGN48915.1| hypothetical protein Csa_6G505920 [Cucumis sativus]	gi|571466678|ref|XM_003529177.2|	345	1e-91	PREDICTED: Glycine max transcription factor bHLH121-like (LOC100818281), transcript variant X1, mRNA	Q9LT23	286	4e-90	BH121_ARATH Transcription factor bHLH121 OS=Arabidopsis thaliana GN=BHLH121 PE=2 SV=1	--	--	--	--	--	K10418	1e-18	82.4	olu:OSTLU_39788	dynein light chain LC8-type
CL2397.Contig1_All	0	0	0	0	0.822	0.4578	0	0	0.0584	0.1102	126.7	2e-30	PREDICTED: transcription factor [Glycine max] >gi|947055909|gb|KRH05362.1| hypothetical protein GLYMA_17G222500 [Glycine max]	gi|571508841|ref|XM_003544518.2|	178	2e-41	PREDICTED: Glycine max probable WRKY transcription factor 40-like (LOC100791870), mRNA	Q9C5T4	102	7e-24	WRK18_ARATH WRKY transcription factor 18 OS=Arabidopsis thaliana GN=WRKY18 PE=1 SV=2	--	--	--	--	--	K13424	2e-09	61.6	vvi:100243352	WRKY transcription factor 33
CL2397.Contig2_All	0.0567	0.2135	0.0596	0	2.9391	4.9456	0.1603	0	0.0671	0.6333	305.4	1e-98	unknown [Glycine max] >gi|734413722|gb|KHN37092.1| Putative WRKY transcription factor 40 [Glycine soja]	gi|571508841|ref|XM_003544518.2|	230	4e-57	PREDICTED: Glycine max probable WRKY transcription factor 40-like (LOC100791870), mRNA	Q9SAH7	159	1e-44	WRK40_ARATH Probable WRKY transcription factor 40 OS=Arabidopsis thaliana GN=WRKY40 PE=1 SV=1	--	--	--	--	--	K13424	1e-17	87.8	vvi:100243352	WRKY transcription factor 33
CL2439.Contig3_All	9.8643	77.3813	26.2923	10.7522	0.4077	11.1971	0.166	0.0834	52.1951	81.1689	288.1	6e-95	PREDICTED: ethylene-responsive transcription factor 1A-like [Glycine max] >gi|947054739|gb|KRH04192.1| hypothetical protein GLYMA_17G145400 [Glycine max]	gi|571436270|ref|XR_136256.2|	190	2e-45	PREDICTED: Glycine max ethylene-responsive transcription factor 1A-like (LOC100807643), misc_RNA	O80337	230	5e-74	EF100_ARATH Ethylene-responsive transcription factor 1A OS=Arabidopsis thaliana GN=ERF1A PE=1 SV=2	--	--	--	--	--	K09286	1e-73	230	ath:AT4G17500	EREBP-like factor
CL2439.Contig4_All	50.6655	229.031	134.139	250.335	3.7797	28.6581	1.7881	1.688	101.223	191.828	392.5	6e-133	hypothetical protein PHAVU_002G055700g [Phaseolus vulgaris] >gi|561030674|gb|ESW29253.1| hypothetical protein PHAVU_002G055700g [Phaseolus vulgaris]	gi|292782853|dbj|AK338219.1|	174	2e-40	Lotus japonicus cDNA, clone: LjFL2-014-DC11, HTC	O80337	268	1e-86	EF100_ARATH Ethylene-responsive transcription factor 1A OS=Arabidopsis thaliana GN=ERF1A PE=1 SV=2	--	--	--	--	--	K09286	3e-86	268	ath:AT4G17500	EREBP-like factor
CL2466.Contig18_All	0.2038	0.7672	0.1071	0	0.1415	0.0945	1.0079	1.3505	0.0603	0.2276	186	4e-53	hypothetical protein LR48_Vigan01g079300 [Vigna angularis]	gi|571516265|ref|XM_006597301.1|	186	6e-44	PREDICTED: Glycine max MADS-box protein JOINTLESS-like (LOC100779453), transcript variant X2, mRNA	Q9FUY6	176	9e-51	JOIN_SOLLC MADS-box protein JOINTLESS OS=Solanum lycopersicum GN=J PE=1 SV=1	YMR042w	67.8	2e-12	COG5068	Regulator of arginine metabolism and related MADS box-containing transcription factors	K09264	2e-31	123	gmx:100808145	MADS-box transcription factor, plant
CL2466.Contig1_All	0.0714	0.2688	0	0	0.4626	0.1325	1.816	2.2981	0	0	186	1e-54	hypothetical protein LR48_Vigan01g079300 [Vigna angularis]	gi|571516265|ref|XM_006597301.1|	186	5e-44	PREDICTED: Glycine max MADS-box protein JOINTLESS-like (LOC100779453), transcript variant X2, mRNA	Q9FUY6	176	3e-52	JOIN_SOLLC MADS-box protein JOINTLESS OS=Solanum lycopersicum GN=J PE=1 SV=1	YMR042w	67.8	1e-12	COG5068	Regulator of arginine metabolism and related MADS box-containing transcription factors	K09264	6e-31	120	rcu:RCOM_0818130	MADS-box transcription factor, plant
CL2466.Contig21_All	1.0275	2.5792	0.48	0.4927	0.4756	0	2.2589	2.9186	1.0128	1.8492	235	2e-72	hypothetical protein VIGAN_01148000 [Vigna angularis var. angularis]	gi|571516265|ref|XM_006597301.1|	186	6e-44	PREDICTED: Glycine max MADS-box protein JOINTLESS-like (LOC100779453), transcript variant X2, mRNA	Q9FUY6	213	2e-65	JOIN_SOLLC MADS-box protein JOINTLESS OS=Solanum lycopersicum GN=J PE=1 SV=1	YMR043w	70.1	1e-12	COG5068	Regulator of arginine metabolism and related MADS box-containing transcription factors	K09264	3e-37	138	smo:SELMODRAFT_450937	MADS-box transcription factor, plant
CL2466.Contig9_All	0.3681	3.3496	3.8693	0.1135	0.4259	0.2562	0	1.1327	2.9391	4.112	144.4	1e-39	PREDICTED: MADS-box protein SVP-like isoform X5 [Prunus mume]	gi|571516265|ref|XM_006597301.1|	135	1e-28	PREDICTED: Glycine max MADS-box protein JOINTLESS-like (LOC100779453), transcript variant X2, mRNA	Q9FUY6	118	3e-31	JOIN_SOLLC MADS-box protein JOINTLESS OS=Solanum lycopersicum GN=J PE=1 SV=1	--	--	--	--	--	K09264	1e-16	79.3	gmx:100808145	MADS-box transcription factor, plant
CL2479.Contig2_All	0.4004	0.6283	0	0	0	0	0.7074	1.3271	0.0592	0.1118	563.5	0	Heat shock transcription factor (HSF) [Glycine max] >gi|734378954|gb|KHN22329.1| Heat stress transcription factor B-4 [Glycine soja]	gi|571458848|ref|XM_003528246.2|	389	1e-105	PREDICTED: Glycine max heat stress transcription factor B-4-like (LOC100781389), mRNA	Q9C635	358	3e-119	HSFB4_ARATH Heat stress transcription factor B-4 OS=Arabidopsis thaliana GN=HSFB4 PE=2 SV=1	YGL073w	94.7	2e-19	COG5169	Heat shock transcription factor	--	--	--	--	--
CL2479.Contig3_All	1.85	1.0041	0.1051	0.5549	0	0	2.7325	3.5034	0.2957	0.1676	572.8	0	Heat shock transcription factor (HSF) [Glycine max] >gi|734378954|gb|KHN22329.1| Heat stress transcription factor B-4 [Glycine soja]	gi|571458848|ref|XM_003528246.2|	383	1e-103	PREDICTED: Glycine max heat stress transcription factor B-4-like (LOC100781389), mRNA	Q9C635	365	3e-122	HSFB4_ARATH Heat stress transcription factor B-4 OS=Arabidopsis thaliana GN=HSFB4 PE=2 SV=1	YGL073w	96.7	4e-20	COG5169	Heat shock transcription factor	--	--	--	--	--
CL2482.Contig1_All	0.4925	0.7947	0.8504	1.6483	0.8792	1.4036	0.2651	0.2665	0.9986	1.1788	644	0	Heat stress transcription factor A-4a [Glycine soja]	gi|571455782|ref|XM_006580116.1|	779	0	PREDICTED: Glycine max heat stress transcription factor A-4a-like (LOC100798004), transcript variant X2, mRNA	O49403	395	5e-130	HFA4A_ARATH Heat stress transcription factor A-4a OS=Arabidopsis thaliana GN=HSFA4A PE=2 SV=1	SPAC2E12.02.02	101	2e-21	COG5169	Heat shock transcription factor	--	--	--	--	--
CL2511.Contig1_All	0.4813	0.1342	0	0	0.0495	0	4.1317	4.0002	0	0.1195	565.8	0	basic helix-loop-helix regulatory protein [Punica granatum]	gi|571481337|ref|XM_006588563.1|	180	4e-42	PREDICTED: Glycine max transcription factor TT8-like (LOC100807157), mRNA	E3SXU4	539	0	BHLHW_PEA Basic helix-loop-helix protein A OS=Pisum sativum GN=BHLH PE=3 SV=1	--	--	--	--	--	K13422	5e-19	92.4	ppp:PHYPADRAFT_164647	transcription factor MYC2
CL2511.Contig2_All	3.8079	4.2318	3.7108	5.7718	0.1469	0.9938	36.3642	35.8296	3.0029	3.7663	898.7	0	transcription factor MYC1, partial [Betula luminifera]	gi|224994135|dbj|AB490778.1|	533	1e-148	Lotus japonicus LjTT8 mRNA for bHLH transcription factor LjTT8, complete cds	E3SXU4	834	0	BHLHW_PEA Basic helix-loop-helix protein A OS=Pisum sativum GN=BHLH PE=3 SV=1	YDL140c	54.3	1e-06	COG0086	DNA-directed RNA polymerase, beta' subunit/160 kD subunit	K13422	3e-47	180	osa:4349484	transcription factor MYC2
CL2511.Contig3_All	3.5759	3.9973	4.346	6.5454	0	0.4148	29.4806	28.1973	2.3793	2.6214	570.1	0	BHLH-like DNA binding protein [Theobroma cacao] >gi|508702900|gb|EOX94796.1| BHLH-like DNA binding protein [Theobroma cacao]	gi|571481337|ref|XM_006588563.1|	222	1e-54	PREDICTED: Glycine max transcription factor TT8-like (LOC100807157), mRNA	E3SXU4	508	1e-174	BHLHW_PEA Basic helix-loop-helix protein A OS=Pisum sativum GN=BHLH PE=3 SV=1	--	--	--	--	--	K13422	6e-23	104	osa:4349484	transcription factor MYC2
CL2511.Contig5_All	1.1211	1.2898	0.9165	0.8064	0.0288	0.0867	11.0323	10.9392	0.8104	1.0088	337.8	0	transcription factor MYC1, partial [Betula luminifera]	gi|224994135|dbj|AB490778.1|	505	1e-140	Lotus japonicus LjTT8 mRNA for bHLH transcription factor LjTT8, complete cds	E3SXU4	513	0	BHLHW_PEA Basic helix-loop-helix protein A OS=Pisum sativum GN=BHLH PE=3 SV=1	--	--	--	--	--	K13422	2e-24	111	ppp:PHYPADRAFT_164647	transcription factor MYC2
CL2511.Contig6_All	1.6477	1.3124	1.0658	1.055	0.088	0.1764	11.7927	11.8208	0.937	1.5928	901	0	transcription factor MYC1, partial [Betula luminifera]	gi|571440192|ref|XM_006575012.1|	523	1e-145	PREDICTED: Glycine max transcription factor TT8-like (LOC100786815), transcript variant X2, mRNA	E3SXU4	835	0	BHLHW_PEA Basic helix-loop-helix protein A OS=Pisum sativum GN=BHLH PE=3 SV=1	SPBC28F2.12	51.6	9e-06	COG0086	DNA-directed RNA polymerase, beta' subunit/160 kD subunit	K13422	2e-45	176	osa:4349484	transcription factor MYC2
CL2575.Contig1_All	1.9807	1.2741	1.8738	1.2518	0.275	0.1608	2.8694	2.4146	2.0208	1.2446	1214.9	0	Putative basic helix-loop-helix protein [Glycine soja]	gi|571488881|ref|XM_003539104.2|	942	0	PREDICTED: Glycine max transcription factor LHW-like (LOC100812899), mRNA	Q9XIN0	366	3e-112	LHW_ARATH Transcription factor LHW OS=Arabidopsis thaliana GN=LHW PE=1 SV=1	--	--	--	--	--	--	--	--	--	--
CL2575.Contig2_All	2.6314	2.7946	1.2293	1.248	0.2498	0.3965	2.6065	3.1091	1.5962	1.4823	1247.7	0	PREDICTED: transcription factor LHW-like [Glycine max]	gi|571488881|ref|XM_003539104.2|	981	0	PREDICTED: Glycine max transcription factor LHW-like (LOC100812899), mRNA	Q9XIN0	372	8e-114	LHW_ARATH Transcription factor LHW OS=Arabidopsis thaliana GN=LHW PE=1 SV=1	--	--	--	--	--	--	--	--	--	--
CL2575.Contig4_All	4.053	5.34	2.0478	2.8994	0.3109	0.9559	5.8021	6.4667	3.1256	3.1268	617.8	0	Putative basic helix-loop-helix protein [Glycine soja]	gi|571488881|ref|XM_003539104.2|	981	0	PREDICTED: Glycine max transcription factor LHW-like (LOC100812899), mRNA	Q9XIN0	348	4e-105	LHW_ARATH Transcription factor LHW OS=Arabidopsis thaliana GN=LHW PE=1 SV=1	--	--	--	--	--	--	--	--	--	--
CL2586.Contig6_All	6.8089	6.7147	4.1263	3.5984	0.5467	0.2257	3.0768	4.2103	7.4788	5.9762	268.9	7e-77	hypothetical protein L484_024273 [Morus notabilis] >gi|587846907|gb|EXB37347.1| hypothetical protein L484_024273 [Morus notabilis]	gi|571457083|ref|XM_003525347.2|	402	1e-109	PREDICTED: Glycine max transcription factor GLABRA 3-like (LOC100795524), mRNA	Q9CAD0	219	1e-61	EGL1_ARATH Transcription factor EGL1 OS=Arabidopsis thaliana GN=BHLH2 PE=1 SV=1	--	--	--	--	--	K01412	4e-26	103	vvi:100266273	mitochondrial processing peptidase [EC:3.4.24.64]
CL2655.Contig3_All	1.954	1.9853	0.6357	0.9179	0	0	0.5698	1.0132	1.2657	0.6236	519.2	4e-178	Transcription factor bHLH130 [Glycine soja]	gi|571471563|ref|XM_003531382.2|	331	2e-87	PREDICTED: Glycine max transcription factor bHLH130-like (LOC100812802), mRNA	Q66GR3	213	4e-63	BH130_ARATH Transcription factor bHLH130 OS=Arabidopsis thaliana GN=BHLH130 PE=1 SV=1	--	--	--	--	--	K12126	2e-06	52	aly:ARALYDRAFT_471048	phytochrome-interacting factor 3
CL2745.Contig13_All	6.3959	5.8833	7.4597	10.3179	8.7998	4.2685	2.3527	2.1154	5.3892	5.383	577.4	0	PREDICTED: rRNA biogenesis protein RRP36-like [Prunus mume]	gi|571503630|ref|XM_003543600.2|	615	1e-172	PREDICTED: Glycine max uncharacterized LOC100814194 (LOC100814194), mRNA	Q9SYG2	130	1e-32	ASIL1_ARATH Trihelix transcription factor ASIL1 OS=Arabidopsis thaliana GN=ASIL1 PE=1 SV=1	YKR072c	57.8	5e-08	COG0452	Phosphopantothenoylcysteine synthetase/decarboxylase	K14782	2e-08	58.5	pop:POPTR_249733	protein AATF/BFR2
CL2835.Contig3_All	23.1717	17.0056	13.4326	19.3657	16.8179	12.6445	30.3915	33.311	10.1078	14.6193	402.9	1e-139	PREDICTED: nuclear transcription factor Y subunit C-1 isoform X1 [Jatropha curcas] >gi|802771285|ref|XP_012090690.1| PREDICTED: nuclear transcription factor Y subunit C-1 isoform X1 [Jatropha curcas] >gi|802771289|ref|XP_012090691.1| PREDICTED: nuclear transcription factor Y subunit C-1 isoform X2 [Jatropha curcas] >gi|643706479|gb|KDP22611.1| hypothetical protein JCGZ_26442 [Jatropha curcas]	gi|470123108|ref|XM_004297531.1|	323	3e-85	PREDICTED: Fragaria vesca subsp. vesca nuclear transcription factor Y subunit C-4-like (LOC101313302), mRNA	Q9SMP0	368	6e-128	NFYC1_ARATH Nuclear transcription factor Y subunit C-1 OS=Arabidopsis thaliana GN=NFYC1 PE=1 SV=1	YOR358w	135	6e-37	COG5208	CCAAT-binding factor, subunit C	K03506	2e-07	52.8	olu:OSTLU_19031	DNA polymerase epsilon subunit 4 [EC:2.7.7.7]
CL2847.Contig1_All	2.4395	19.1542	22.4815	46.2419	84.1832	75.9673	14.1115	15.2016	15.8372	18.8854	367.1	1e-122	heat shock factor [Glycine max] >gi|662930|emb|CAA87077.1| heat shock transcription factor 34 [Glycine max] >gi|402715721|gb|AFQ93674.1| heat shock transcription factor HSFB1 [Glycine max]	gi|210140817|dbj|AK244736.1|	396	1e-107	Glycine max cDNA, clone: GMFL01-12-J13	P22335	303	1e-99	HSF24_SOLPE Heat shock factor protein HSF24 OS=Solanum peruvianum GN=HSF24 PE=2 SV=1	YGL073w	105	5e-23	COG5169	Heat shock transcription factor	--	--	--	--	--
CL2847.Contig2_All	1.5375	15.0027	22.7307	36.2074	85.1681	90.6709	11.496	10.7542	10.6777	13.2419	370.2	8e-123	heat shock factor [Glycine max] >gi|662930|emb|CAA87077.1| heat shock transcription factor 34 [Glycine max] >gi|402715721|gb|AFQ93674.1| heat shock transcription factor HSFB1 [Glycine max]	gi|210140817|dbj|AK244736.1|	404	1e-109	Glycine max cDNA, clone: GMFL01-12-J13	P22335	302	3e-98	HSF24_SOLPE Heat shock factor protein HSF24 OS=Solanum peruvianum GN=HSF24 PE=2 SV=1	YGL073w	105	8e-23	COG5169	Heat shock transcription factor	--	--	--	--	--
CL2864.Contig10_All	0.0642	0.4834	0.3823	0.4749	0.3367	0.3574	0.0403	0.0405	0.6327	0.6214	936.4	0	GRAS family transcription factor [Medicago truncatula] >gi|657401495|gb|KEH40473.1| GRAS family transcription factor [Medicago truncatula]	gi|571452107|ref|XM_006578883.1|	1215	0	PREDICTED: Glycine max scarecrow-like protein 1-like (LOC100788103), transcript variant X2, mRNA	Q9SDQ3	704	0	SCL1_ARATH Scarecrow-like protein 1 OS=Arabidopsis thaliana GN=SCL1 PE=2 SV=1	--	--	--	--	--	K14494	9e-65	233	pop:POPTR_719856	DELLA protein
CL2864.Contig11_All	0.1515	0.5434	0.5006	0.4805	0.2204	0.5825	0.0612	0.0615	1.2803	1.2332	936.4	0	GRAS family transcription factor [Medicago truncatula] >gi|657401495|gb|KEH40473.1| GRAS family transcription factor [Medicago truncatula]	gi|571452107|ref|XM_006578883.1|	1215	0	PREDICTED: Glycine max scarecrow-like protein 1-like (LOC100788103), transcript variant X2, mRNA	Q9SDQ3	704	0	SCL1_ARATH Scarecrow-like protein 1 OS=Arabidopsis thaliana GN=SCL1 PE=2 SV=1	--	--	--	--	--	K14494	9e-65	233	pop:POPTR_719856	DELLA protein
CL2864.Contig12_All	0.5779	0.2418	1.0462	1.0689	0.4458	0.6852	0.121	0.1824	1.4431	0.9325	936.4	0	GRAS family transcription factor [Medicago truncatula] >gi|657401495|gb|KEH40473.1| GRAS family transcription factor [Medicago truncatula]	gi|571452107|ref|XM_006578883.1|	1215	0	PREDICTED: Glycine max scarecrow-like protein 1-like (LOC100788103), transcript variant X2, mRNA	Q9SDQ3	704	0	SCL1_ARATH Scarecrow-like protein 1 OS=Arabidopsis thaliana GN=SCL1 PE=2 SV=1	--	--	--	--	--	K14494	1e-65	233	pop:POPTR_719856	DELLA protein
CL2864.Contig2_All	0.7756	1.0199	2.3295	2.5506	2.0515	4.6957	0.5916	0.3148	1.7913	1.1965	936.4	0	GRAS family transcription factor [Medicago truncatula] >gi|657401495|gb|KEH40473.1| GRAS family transcription factor [Medicago truncatula]	gi|571452107|ref|XM_006578883.1|	1215	0	PREDICTED: Glycine max scarecrow-like protein 1-like (LOC100788103), transcript variant X2, mRNA	Q9SDQ3	704	0	SCL1_ARATH Scarecrow-like protein 1 OS=Arabidopsis thaliana GN=SCL1 PE=2 SV=1	--	--	--	--	--	K14494	3e-66	233	pop:POPTR_719856	DELLA protein
CL2864.Contig3_All	0.6922	1.3798	1.7119	2.661	1.1307	1.738	0.3836	0.1157	1.8783	1.7283	936.4	0	GRAS family transcription factor [Medicago truncatula] >gi|657401495|gb|KEH40473.1| GRAS family transcription factor [Medicago truncatula]	gi|571452107|ref|XM_006578883.1|	1215	0	PREDICTED: Glycine max scarecrow-like protein 1-like (LOC100788103), transcript variant X2, mRNA	Q9SDQ3	704	0	SCL1_ARATH Scarecrow-like protein 1 OS=Arabidopsis thaliana GN=SCL1 PE=2 SV=1	--	--	--	--	--	K14494	8e-67	233	pop:POPTR_719856	DELLA protein
CL2864.Contig4_All	0.4702	0.6809	0.4942	1.338	0.7701	1.4097	0.2045	0.1712	0.599	0.404	936.4	0	GRAS family transcription factor [Medicago truncatula] >gi|657401495|gb|KEH40473.1| GRAS family transcription factor [Medicago truncatula]	gi|571452107|ref|XM_006578883.1|	1199	0	PREDICTED: Glycine max scarecrow-like protein 1-like (LOC100788103), transcript variant X2, mRNA	Q9SDQ3	704	0	SCL1_ARATH Scarecrow-like protein 1 OS=Arabidopsis thaliana GN=SCL1 PE=2 SV=1	--	--	--	--	--	K14494	3e-66	233	pop:POPTR_719856	DELLA protein
CL2864.Contig7_All	0.1296	0.781	0.4633	0.6714	0.144	0.5534	0.0733	0.0736	0.9507	1.1296	936.4	0	GRAS family transcription factor [Medicago truncatula] >gi|657401495|gb|KEH40473.1| GRAS family transcription factor [Medicago truncatula]	gi|571452107|ref|XM_006578883.1|	1207	0	PREDICTED: Glycine max scarecrow-like protein 1-like (LOC100788103), transcript variant X2, mRNA	Q9SDQ3	704	0	SCL1_ARATH Scarecrow-like protein 1 OS=Arabidopsis thaliana GN=SCL1 PE=2 SV=1	--	--	--	--	--	K14494	5e-65	233	pop:POPTR_719856	DELLA protein
CL2888.Contig13_All	0	0.1591	0.2831	0.0977	0.0587	0.0882	0	0	0.2436	0.2478	80.5	1e-12	PREDICTED: uncharacterized protein LOC100805307 isoform X1 [Glycine max]	gi|571516651|ref|XM_006597352.1|	892	0	PREDICTED: Glycine max uncharacterized LOC100805307 (LOC100805307), transcript variant X2, mRNA	Q94BR5	413	1e-122	CHR28_ARATH Helicase-like transcription factor CHR28 OS=Arabidopsis thaliana GN=CHR28 PE=1 SV=1	SPAC17A2.12	159	1e-38	COG0553	Superfamily II DNA/RNA helicases, SNF2 family	K15173	4e-45	175	smo:SELMODRAFT_109740	transcription termination factor 2 [EC:3.6.4.-]
CL2888.Contig1_All	0.5168	1.6964	2.716	1.5441	0.3128	1.1435	0.2434	0.5269	1.2225	1.754	1729.9	0	PREDICTED: uncharacterized protein LOC100805307 isoform X2 [Glycine max] >gi|947061544|gb|KRH10805.1| hypothetical protein GLYMA_15G070100 [Glycine max]	gi|571516651|ref|XM_006597352.1|	1899	0	PREDICTED: Glycine max uncharacterized LOC100805307 (LOC100805307), transcript variant X2, mRNA	Q94BR5	881	0	CHR28_ARATH Helicase-like transcription factor CHR28 OS=Arabidopsis thaliana GN=CHR28 PE=1 SV=1	SPAC17A2.12	330	6e-95	COG0553	Superfamily II DNA/RNA helicases, SNF2 family	K15711	3e-101	347	vvi:100263696	SWI/SNF-related matrix-associated actin-dependent regulator of chromatin subfamily A3 [EC:3.6.4.- 6.3.2.19]
CL2888.Contig3_All	1.0033	5.5555	2.3573	4.0027	0.4917	0.931	0.4448	0.2794	5.864	6.0652	74.3	1e-11	hypothetical protein PHAVU_006G189200g [Phaseolus vulgaris] >gi|561021431|gb|ESW20202.1| hypothetical protein PHAVU_006G189200g [Phaseolus vulgaris]	gi|502077782|ref|XM_004485686.1|	163	8e-37	PREDICTED: Cicer arietinum DNA repair protein RAD5-like (LOC101510831), mRNA	Q94BR5	56.2	5e-08	CHR28_ARATH Helicase-like transcription factor CHR28 OS=Arabidopsis thaliana GN=CHR28 PE=1 SV=1	--	--	--	--	--	--	--	--	--	--
CL2888.Contig9_All	0.5169	0.8891	1.0465	1.2513	0.3367	0.7107	0.3788	0.1088	0.8606	1.0266	1768.4	0	PREDICTED: uncharacterized protein LOC100805307 isoform X2 [Glycine max] >gi|947061544|gb|KRH10805.1| hypothetical protein GLYMA_15G070100 [Glycine max]	gi|571516651|ref|XM_006597352.1|	1895	0	PREDICTED: Glycine max uncharacterized LOC100805307 (LOC100805307), transcript variant X2, mRNA	Q94BR5	881	0	CHR28_ARATH Helicase-like transcription factor CHR28 OS=Arabidopsis thaliana GN=CHR28 PE=1 SV=1	SPAC17A2.12	330	7e-95	COG0553	Superfamily II DNA/RNA helicases, SNF2 family	K15711	4e-101	347	vvi:100263696	SWI/SNF-related matrix-associated actin-dependent regulator of chromatin subfamily A3 [EC:3.6.4.- 6.3.2.19]
CL2972.Contig1_All	4.3967	5.1481	5.5521	1.5283	0.1639	0.0821	5.6996	5.4483	7.6442	12.592	1315.4	0	Subtilisin-like protease [Morus notabilis] >gi|587847951|gb|EXB38258.1| Subtilisin-like protease [Morus notabilis]	gi|571464840|ref|XM_003528685.2|	593	1e-166	PREDICTED: Glycine max subtilisin-like protease-like (LOC100819529), mRNA	Q9LUM3	1225	0	SBT15_ARATH Subtilisin-like protease SBT1.5 OS=Arabidopsis thaliana GN=SBT1.5 PE=2 SV=1	BS_vpr	145	6e-35	COG1404	Subtilisin-like serine proteases	K08653	2e-07	57	pop:POPTR_779308	membrane-bound transcription factor site-1 protease [EC:3.4.21.112]
CL2972.Contig2_All	9.1968	6.0573	2.1057	0.6363	0.0562	0	8.1219	6.9261	1.7952	3.0855	1263.4	0	PREDICTED: subtilisin-like protease SBT1.6 [Cicer arietinum]	gi|571464840|ref|XM_003528685.2|	498	1e-137	PREDICTED: Glycine max subtilisin-like protease-like (LOC100819529), mRNA	Q9LUM3	1174	0	SBT15_ARATH Subtilisin-like protease SBT1.5 OS=Arabidopsis thaliana GN=SBT1.5 PE=2 SV=1	BS_vpr	139	5e-33	COG1404	Subtilisin-like serine proteases	K08653	4e-07	55.8	vvi:100264570	membrane-bound transcription factor site-1 protease [EC:3.4.21.112]
CL2972.Contig3_All	0.9278	0.8433	0.6053	0.1578	0	0	1.1455	1.3329	0.3028	0.5718	1266.5	0	PREDICTED: subtilisin-like protease SBT1.6 [Cicer arietinum]	gi|571464840|ref|XM_003528685.2|	490	1e-135	PREDICTED: Glycine max subtilisin-like protease-like (LOC100819529), mRNA	Q9LUM3	1177	0	SBT15_ARATH Subtilisin-like protease SBT1.5 OS=Arabidopsis thaliana GN=SBT1.5 PE=2 SV=1	BS_vpr	139	4e-33	COG1404	Subtilisin-like serine proteases	K08653	3e-07	55.8	vvi:100264570	membrane-bound transcription factor site-1 protease [EC:3.4.21.112]
CL2972.Contig4_All	63.5811	99.2571	69.5162	32.3811	1.9131	0.7897	63.0279	55.7123	76.0718	125.754	1320.1	0	Subtilisin-like protease [Morus notabilis] >gi|587847951|gb|EXB38258.1| Subtilisin-like protease [Morus notabilis]	gi|571464840|ref|XM_003528685.2|	660	0	PREDICTED: Glycine max subtilisin-like protease-like (LOC100819529), mRNA	Q9LUM3	1237	0	SBT15_ARATH Subtilisin-like protease SBT1.5 OS=Arabidopsis thaliana GN=SBT1.5 PE=2 SV=1	BH0831	145	4e-35	COG1404	Subtilisin-like serine proteases	K08653	2e-07	57	pop:POPTR_779308	membrane-bound transcription factor site-1 protease [EC:3.4.21.112]
CL299.Contig18_All	6.2988	3.3448	10.6954	14.9371	2.6911	4.6087	2.0544	2.0645	6.0179	4.8713	166.8	6e-49	K-box region and MADS-box transcription factor family protein isoform 1 [Theobroma cacao] >gi|508707882|gb|EOX99778.1| K-box region and MADS-box transcription factor family protein isoform 1 [Theobroma cacao]	gi|571470845|ref|XM_006585069.1|	258	9e-66	PREDICTED: Glycine max MADS-box transcription factor 1-like (LOC100778931), transcript variant X4, mRNA	O65874	144	3e-42	MTF1_PEA MADS-box transcription factor 1 OS=Pisum sativum GN=MTF1 PE=2 SV=1	--	--	--	--	--	K09264	1e-28	110	vvi:100232867	MADS-box transcription factor, plant
CL302.Contig12_All	12.4092	9.0126	15.3888	11.9495	0.4517	0.9057	14.5822	16.9643	15.5033	21.2604	226.9	3e-71	PREDICTED: GATA transcription factor 16-like [Cucumis melo]	gi|571533192|ref|XM_003550478.2|	163	7e-37	PREDICTED: Glycine max GATA transcription factor 16-like (LOC100789636), mRNA	Q8LG10	159	3e-47	GAT15_ARATH GATA transcription factor 15 OS=Arabidopsis thaliana GN=GATA15 PE=2 SV=2	YMR136w	52.8	9e-07	COG5641	GATA Zn-finger-containing transcription factor	--	--	--	--	--
CL302.Contig8_All	5.5343	4.1518	5.6167	3.7653	0.4122	0.2361	6.0536	4.7583	7.9761	7.5324	83.6	1e-49	PREDICTED: GATA transcription factor 16-like [Cucumis melo]	gi|571533192|ref|XM_003550478.2|	97.6	4e-17	PREDICTED: Glycine max GATA transcription factor 16-like (LOC100789636), mRNA	Q8LG10	108	2e-33	GAT15_ARATH GATA transcription factor 15 OS=Arabidopsis thaliana GN=GATA15 PE=2 SV=2	--	--	--	--	--	--	--	--	--	--
CL3080.Contig10_All	0.8489	4.3772	3.1593	3.3668	0.9345	2.1717	0.5188	0.3259	4.5052	5.4335	253.4	6e-73	Basic-leucine zipper transcription factor family protein, putative isoform 2, partial [Theobroma cacao] >gi|508705519|gb|EOX97415.1| Basic-leucine zipper transcription factor family protein, putative isoform 2, partial [Theobroma cacao]	gi|571515985|ref|XM_003547016.2|	145	5e-31	PREDICTED: Glycine max G-box-binding factor 4-like (LOC100807974), mRNA	Q9LES3	115	5e-28	AI5L2_ARATH ABSCISIC ACID-INSENSITIVE 5-like protein 2 OS=Arabidopsis thaliana GN=DPBF3 PE=1 SV=1	--	--	--	--	--	K14432	2e-69	236	vvi:100250466	ABA responsive element binding factor
CL3080.Contig12_All	0.4933	1.5478	1.2314	1.9008	1.1415	2.3459	0.2905	0.0584	0.5835	1.5842	216.9	9e-65	hypothetical protein VITISV_019619 [Vitis vinifera]	gi|571472001|ref|XM_003531524.2|	147	5e-32	PREDICTED: Glycine max transcription factor bZIP81 (BZIP81), transcript variant X1, mRNA	P42777	112	4e-30	GBF4_ARATH G-box-binding factor 4 OS=Arabidopsis thaliana GN=GBF4 PE=1 SV=1	--	--	--	--	--	K14432	3e-66	216	vvi:100250466	ABA responsive element binding factor
CL3080.Contig1_All	3.8314	7.7963	6.8343	12.5275	5.75	11.2051	1.0939	1.3192	5.2875	8.6897	271.2	2e-84	Basic-leucine zipper transcription factor family protein, putative isoform 2, partial [Theobroma cacao] >gi|508705519|gb|EOX97415.1| Basic-leucine zipper transcription factor family protein, putative isoform 2, partial [Theobroma cacao]	gi|571472001|ref|XM_003531524.2|	135	2e-28	PREDICTED: Glycine max transcription factor bZIP81 (BZIP81), transcript variant X1, mRNA	P42777	157	5e-44	GBF4_ARATH G-box-binding factor 4 OS=Arabidopsis thaliana GN=GBF4 PE=1 SV=1	--	--	--	--	--	K14432	8e-83	260	vvi:100250466	ABA responsive element binding factor
CL3080.Contig4_All	0.5083	2.488	2.0302	1.943	1.1292	1.7923	0.3352	0.385	1.5031	1.9872	292	1e-91	Basic-leucine zipper transcription factor family protein, putative isoform 2, partial [Theobroma cacao] >gi|508705519|gb|EOX97415.1| Basic-leucine zipper transcription factor family protein, putative isoform 2, partial [Theobroma cacao]	gi|571472001|ref|XM_003531524.2|	161	4e-36	PREDICTED: Glycine max transcription factor bZIP81 (BZIP81), transcript variant X1, mRNA	P42777	144	9e-39	GBF4_ARATH G-box-binding factor 4 OS=Arabidopsis thaliana GN=GBF4 PE=1 SV=1	--	--	--	--	--	K14432	2e-91	285	vvi:100250466	ABA responsive element binding factor
CL3080.Contig7_All	0.9037	2.5779	1.3817	2.7353	1.2929	1.5629	0.2709	0.2723	2.5267	1.7896	253.4	2e-75	Basic-leucine zipper transcription factor family protein, putative isoform 2, partial [Theobroma cacao] >gi|508705519|gb|EOX97415.1| Basic-leucine zipper transcription factor family protein, putative isoform 2, partial [Theobroma cacao]	gi|571472001|ref|XM_003531524.2|	147	7e-32	PREDICTED: Glycine max transcription factor bZIP81 (BZIP81), transcript variant X1, mRNA	Q9LES3	115	2e-28	AI5L2_ARATH ABSCISIC ACID-INSENSITIVE 5-like protein 2 OS=Arabidopsis thaliana GN=DPBF3 PE=1 SV=1	--	--	--	--	--	K14432	1e-71	236	vvi:100250466	ABA responsive element binding factor
CL3080.Contig8_All	0.6983	2.7841	1.8135	2.4821	1.445	1.8297	0.1548	0.2334	1.1662	1.7896	249.6	5e-74	Basic-leucine zipper transcription factor family protein, putative isoform 2, partial [Theobroma cacao] >gi|508705519|gb|EOX97415.1| Basic-leucine zipper transcription factor family protein, putative isoform 2, partial [Theobroma cacao]	gi|571515985|ref|XM_003547016.2|	145	3e-31	PREDICTED: Glycine max G-box-binding factor 4-like (LOC100807974), mRNA	Q9LES3	117	7e-29	AI5L2_ARATH ABSCISIC ACID-INSENSITIVE 5-like protein 2 OS=Arabidopsis thaliana GN=DPBF3 PE=1 SV=1	--	--	--	--	--	K14432	5e-72	238	vvi:100250466	ABA responsive element binding factor
CL3080.Contig9_All	0.7692	1.9308	1.4374	1.0539	1.0285	2.062	0.1611	0.0809	1.112	1.9094	56.2	7e-08	transcription factor bZIP81 [Glycine max]	gi|145652346|gb|DQ792727.1|	113	5e-22	Glycine max transcription factor bZIP81 (bZIP81) mRNA, partial cds	P42777	47	9e-06	GBF4_ARATH G-box-binding factor 4 OS=Arabidopsis thaliana GN=GBF4 PE=1 SV=1	--	--	--	--	--	K14432	6e-08	54.3	gmx:100101890	ABA responsive element binding factor
CL3105.Contig5_All	7.7145	4.5566	6.7734	7.0509	5.629	6.3167	12.2285	11.1715	4.7237	4.7651	326.2	1e-109	hypothetical protein VIGAN_04325500 [Vigna angularis var. angularis]	gi|502111046|ref|XM_004493885.1|	476	1e-131	PREDICTED: Cicer arietinum nuclear transcription factor Y subunit B-10-like (LOC101512494), mRNA	Q67XJ2	248	9e-83	NFYBA_ARATH Nuclear transcription factor Y subunit B-10 OS=Arabidopsis thaliana GN=NFYB10 PE=2 SV=1	YBL021c	138	9e-40	COG2036	Histones H3 and H4	K08065	8e-66	206	zma:100285917	nuclear transcription Y subunit beta
CL3118.Contig1_All	603.196	574.973	257.457	513.289	66.8946	96.7977	176.814	176.81	261.819	304.962	422.6	1e-146	hypothetical protein PHAVU_006G169600g, partial [Phaseolus vulgaris] >gi|561021193|gb|ESW19964.1| hypothetical protein PHAVU_006G169600g, partial [Phaseolus vulgaris]	gi|571517181|ref|XM_003546007.2|	634	1e-179	PREDICTED: Glycine max floral homeotic protein AGAMOUS-like (LOC100790650), transcript variant X1, mRNA	Q40872	359	5e-124	AG_PANGI Floral homeotic protein AGAMOUS OS=Panax ginseng GN=AG2 PE=2 SV=1	YPL089c	69.7	4e-12	COG5068	Regulator of arginine metabolism and related MADS box-containing transcription factors	K09264	6e-142	406	gmx:732595	MADS-box transcription factor, plant
CL3118.Contig3_All	4.1476	5.7736	2.2987	4.1846	19.1271	9.1672	19.8235	18.9215	2.4084	3.2011	346.3	5e-117	floral homeotic protein AGAMOUS [Thermopsis turcica]	gi|571517181|ref|XM_003546007.2|	430	1e-117	PREDICTED: Glycine max floral homeotic protein AGAMOUS-like (LOC100790650), transcript variant X1, mRNA	Q40168	301	2e-101	AG_SOLLC Floral homeotic protein AGAMOUS OS=Solanum lycopersicum GN=AG1 PE=2 SV=1	YPL089c	72	7e-13	COG5068	Regulator of arginine metabolism and related MADS box-containing transcription factors	K09264	4e-114	334	gmx:732595	MADS-box transcription factor, plant
CL3118.Contig5_All	1.2934	2.2137	0.618	1.16	5.0069	2.0732	2.7697	3.9523	0.6259	0.6567	382.9	1e-129	floral homeotic protein AGAMOUS [Thermopsis turcica]	gi|571517181|ref|XM_003546007.2|	549	1e-153	PREDICTED: Glycine max floral homeotic protein AGAMOUS-like (LOC100790650), transcript variant X1, mRNA	Q40168	338	4e-114	AG_SOLLC Floral homeotic protein AGAMOUS OS=Solanum lycopersicum GN=AG1 PE=2 SV=1	YPL089c	72	1e-12	COG5068	Regulator of arginine metabolism and related MADS box-containing transcription factors	K09264	8e-127	371	gmx:732595	MADS-box transcription factor, plant
CL3186.Contig1_All	64.8267	221.637	105.629	83.0627	4.0632	6.2664	2.4257	2.118	219.713	222.767	338.6	3e-108	hypothetical protein PRUPE_ppa007892mg [Prunus persica] >gi|462405049|gb|EMJ10513.1| hypothetical protein PRUPE_ppa007892mg [Prunus persica]	gi|571487154|ref|XM_003538974.2|	161	4e-36	PREDICTED: Glycine max ethylene-responsive transcription factor 5-like (LOC100800788), mRNA	O80341	235	2e-71	EF102_ARATH Ethylene-responsive transcription factor 5 OS=Arabidopsis thaliana GN=ERF5 PE=2 SV=1	--	--	--	--	--	K09286	1e-105	324	gmx:100800788	EREBP-like factor
CL3186.Contig2_All	0.8791	5.5903	2.2793	1.5899	0.0542	0	0.0552	0.111	4.7139	5.0409	333.6	9e-109	PREDICTED: ethylene-responsive transcription factor 5 [Prunus mume]	gi|571487154|ref|XM_003538974.2|	163	8e-37	PREDICTED: Glycine max ethylene-responsive transcription factor 5-like (LOC100800788), mRNA	O80341	222	2e-68	EF102_ARATH Ethylene-responsive transcription factor 5 OS=Arabidopsis thaliana GN=ERF5 PE=2 SV=1	--	--	--	--	--	K09286	5e-110	329	gmx:100800788	EREBP-like factor
CL3186.Contig3_All	9.6201	41.1166	17.1905	12.8618	0.1875	0.8457	0.2862	0.1918	35.2762	39.3659	336.6	1e-109	PREDICTED: ethylene-responsive transcription factor 6-like [Vigna radiata var. radiata]	gi|571487154|ref|XM_003538974.2|	153	9e-34	PREDICTED: Glycine max ethylene-responsive transcription factor 5-like (LOC100800788), mRNA	O80341	235	2e-72	EF102_ARATH Ethylene-responsive transcription factor 5 OS=Arabidopsis thaliana GN=ERF5 PE=2 SV=1	--	--	--	--	--	K09286	6e-105	319	gmx:100800788	EREBP-like factor
CL3186.Contig4_All	7.577	41.2395	13.2501	9.4284	0	0.1278	0.3245	0.0652	25.2586	38.9352	335.5	2e-111	PREDICTED: ethylene-responsive transcription factor 6-like [Vigna radiata var. radiata]	gi|571487154|ref|XM_003538974.2|	147	4e-32	PREDICTED: Glycine max ethylene-responsive transcription factor 5-like (LOC100800788), mRNA	O80341	222	3e-69	EF102_ARATH Ethylene-responsive transcription factor 5 OS=Arabidopsis thaliana GN=ERF5 PE=2 SV=1	--	--	--	--	--	K09286	5e-109	324	gmx:100800788	EREBP-like factor
CL3186.Contig5_All	15.8326	73.5509	25.6194	17.0934	0.1216	0.4877	0.7428	0.4354	47.5585	67.3695	335.5	5e-111	PREDICTED: ethylene-responsive transcription factor 6-like [Vigna radiata var. radiata]	gi|571487154|ref|XM_003538974.2|	155	2e-34	PREDICTED: Glycine max ethylene-responsive transcription factor 5-like (LOC100800788), mRNA	O80341	222	6e-69	EF102_ARATH Ethylene-responsive transcription factor 5 OS=Arabidopsis thaliana GN=ERF5 PE=2 SV=1	--	--	--	--	--	K09286	1e-108	324	gmx:100800788	EREBP-like factor
CL3202.Contig1_All	0	0.1639	0.2745	0.161	1.692	2.0596	0	0.1236	0	0.2917	132.5	6e-36	hypothetical protein GLYMA_03G239400, partial [Glycine max] >gi|947120332|gb|KRH68581.1| hypothetical protein GLYMA_03G239400, partial [Glycine max]	gi|571448216|ref|XM_006577675.1|	242	5e-61	PREDICTED: Glycine max nuclear transcription factor Y subunit C-9-like (LOC100782754), mRNA	--	--	--	--	--	--	--	--	--	--	--	--	--	--
CL3202.Contig2_All	0	0.1742	0	0	1.4134	1.1592	0	0	0	0	136.3	1e-37	hypothetical protein GLYMA_03G239400, partial [Glycine max] >gi|947120332|gb|KRH68581.1| hypothetical protein GLYMA_03G239400, partial [Glycine max]	gi|571448216|ref|XM_006577675.1|	258	8e-66	PREDICTED: Glycine max nuclear transcription factor Y subunit C-9-like (LOC100782754), mRNA	--	--	--	--	--	--	--	--	--	--	--	--	--	--
CL3276.Contig11_All	0.4137	0.1154	0.7731	0.7936	0.2553	0.0427	1.6025	1.1316	0.9244	2.0026	443	2e-150	Transcription factor ASG4 [Glycine soja]	gi|571448135|ref|XM_003520592.2|	440	1e-120	PREDICTED: Glycine max transcription factor ASG4-like (LOC100807156), mRNA	Q8RWU3	330	1e-108	RVE8_ARATH Protein REVEILLE 8 OS=Arabidopsis thaliana GN=RVE8 PE=2 SV=1	--	--	--	--	--	K12133	1e-27	119	ath:AT1G01060	LATE ELONGATED HYPOCOTYL
CL3276.Contig17_All	0.1074	0	0.4891	0.2648	0	0.1328	0.6744	0.8133	1.6934	1.5592	62	3e-08	hypothetical protein B456_006G178000 [Gossypium raimondii]	gi|571558327|ref|XM_006604485.1|	111	4e-21	PREDICTED: Glycine max transcription factor ASG4-like (LOC100783482), transcript variant X2, mRNA	Q8RWU3	57	2e-08	RVE8_ARATH Protein REVEILLE 8 OS=Arabidopsis thaliana GN=RVE8 PE=2 SV=1	--	--	--	--	--	--	--	--	--	--
CL3276.Contig7_All	0.6514	0.7154	1.3267	1.7573	0.603	0.8312	3.5677	3.6624	3.3713	4.048	416.8	1e-139	hypothetical protein GLYMA_10G048500 [Glycine max]	gi|571448135|ref|XM_003520592.2|	583	1e-163	PREDICTED: Glycine max transcription factor ASG4-like (LOC100807156), mRNA	Q8RWU3	340	1e-111	RVE8_ARATH Protein REVEILLE 8 OS=Arabidopsis thaliana GN=RVE8 PE=2 SV=1	--	--	--	--	--	K12133	8e-29	124	ath:AT1G01060	LATE ELONGATED HYPOCOTYL
CL3317.Contig1_All	7.2297	2.7347	1.5095	3.4806	0.1375	0	4.0125	3.9853	1.4058	2.4892	724.9	0	inducer of CBF expression 2 [Vitis riparia] >gi|641398232|gb|AIA58705.1| inducer of CBF expression 2 [Vitis riparia]	gi|359806582|ref|NM_001254339.1|	603	1e-169	Glycine max transcription factor ICE1-like (LOC100804797), mRNA >gi|318056130|gb|HM989925.1| Glycine max ICEa mRNA, complete cds	Q9LSE2	525	0	ICE1_ARATH Transcription factor ICE1 OS=Arabidopsis thaliana GN=SCRM PE=1 SV=1	--	--	--	--	--	K13422	1e-17	88.2	gmx:100790854	transcription factor MYC2
CL3317.Contig2_All	9.0111	4.1866	1.8839	1.9032	0.1383	0.2772	7.5991	8.815	1.3545	1.446	86.7	1e-15	Basic helix-loop-helix DNA-binding superfamily protein, putative isoform 2, partial [Theobroma cacao] >gi|508711038|gb|EOY02935.1| Basic helix-loop-helix DNA-binding superfamily protein, putative isoform 2, partial [Theobroma cacao]	gi|359806582|ref|NM_001254339.1|	486	1e-134	Glycine max transcription factor ICE1-like (LOC100804797), mRNA >gi|318056130|gb|HM989925.1| Glycine max ICEa mRNA, complete cds	Q9LSE2	310	1e-98	ICE1_ARATH Transcription factor ICE1 OS=Arabidopsis thaliana GN=SCRM PE=1 SV=1	--	--	--	--	--	K13422	1e-16	84.7	gmx:100790854	transcription factor MYC2
CL3317.Contig3_All	26.6488	1.8912	0.4978	0.6371	0.6376	1.3983	38.3729	39.8254	0.9166	1.2504	796.2	0	inducer of CBF expression 2 [Vitis riparia] >gi|641398232|gb|AIA58705.1| inducer of CBF expression 2 [Vitis riparia]	gi|359806582|ref|NM_001254339.1|	577	1e-161	Glycine max transcription factor ICE1-like (LOC100804797), mRNA >gi|318056130|gb|HM989925.1| Glycine max ICEa mRNA, complete cds	Q9LSE2	528	0	ICE1_ARATH Transcription factor ICE1 OS=Arabidopsis thaliana GN=SCRM PE=1 SV=1	--	--	--	--	--	K13422	1e-16	85.1	gmx:100790854	transcription factor MYC2
CL3317.Contig4_All	16.4224	8.3362	4.1123	6.2268	0.0421	0.2533	10.5441	14.9034	3.2287	4.1162	756.5	0	inducer of CBF expression 2 [Vitis riparia] >gi|641398232|gb|AIA58705.1| inducer of CBF expression 2 [Vitis riparia]	gi|359806582|ref|NM_001254339.1|	603	1e-169	Glycine max transcription factor ICE1-like (LOC100804797), mRNA >gi|318056130|gb|HM989925.1| Glycine max ICEa mRNA, complete cds	Q9LSE2	529	0	ICE1_ARATH Transcription factor ICE1 OS=Arabidopsis thaliana GN=SCRM PE=1 SV=1	--	--	--	--	--	K13422	6e-18	89.4	gmx:100790854	transcription factor MYC2
CL3321.Contig24_All	0.6337	0.4211	0.1567	0.1839	0	0	1.2996	0.8118	0.0882	0.0833	954.1	0	Protodermal factor 2 isoform 1 [Theobroma cacao] >gi|590625865|ref|XP_007026003.1| Protodermal factor 2 isoform 1 [Theobroma cacao] >gi|590625868|ref|XP_007026004.1| Protodermal factor 2 isoform 1 [Theobroma cacao] >gi|508781368|gb|EOY28624.1| Protodermal factor 2 isoform 1 [Theobroma cacao] >gi|508781369|gb|EOY28625.1| Protodermal factor 2 isoform 1 [Theobroma cacao] >gi|508781370|gb|EOY28626.1|…	gi|571486567|ref|XM_006590328.1|	831	0	PREDICTED: Glycine max homeobox-leucine zipper protein MERISTEM L1-like (LOC100782240), transcript variant X2, mRNA	Q8RWU4	889	0	ATML1_ARATH Homeobox-leucine zipper protein MERISTEM L1 OS=Arabidopsis thaliana GN=ATML1 PE=2 SV=1	SPBC21B10.13c	49.3	7e-06	COG5576	Homeodomain-containing transcription factor	K09338	0	885	ath:AT4G04890	homeobox-leucine zipper protein
CL3321.Contig25_All	4.212	1.6455	0.4398	0.8943	0.0258	0	5.0462	4.5692	0.7919	0.5609	1213	0	PREDICTED: homeobox-leucine zipper protein MERISTEM L1 [Vitis vinifera] >gi|302144076|emb|CBI23181.3| unnamed protein product [Vitis vinifera]	gi|571486567|ref|XM_006590328.1|	1104	0	PREDICTED: Glycine max homeobox-leucine zipper protein MERISTEM L1-like (LOC100782240), transcript variant X2, mRNA	Q8RWU4	1134	0	ATML1_ARATH Homeobox-leucine zipper protein MERISTEM L1 OS=Arabidopsis thaliana GN=ATML1 PE=2 SV=1	SPBC21B10.13c	53.1	5e-07	COG5576	Homeodomain-containing transcription factor	K09338	0	1128	ath:AT4G04890	homeobox-leucine zipper protein
CL3321.Contig2_All	0.6247	0.2987	1.0631	0.1834	0	0.0276	1.009	0.9013	0.4574	1.0301	1344.7	0	PREDICTED: homeobox-leucine zipper protein HDG2 [Vigna radiata var. radiata] >gi|950978203|ref|XP_014501635.1| PREDICTED: homeobox-leucine zipper protein HDG2 [Vigna radiata var. radiata] >gi|950978208|ref|XP_014501636.1| PREDICTED: homeobox-leucine zipper protein HDG2 [Vigna radiata var. radiata] >gi|950978214|ref|XP_014501637.1| PREDICTED: homeobox-leucine zipper protein HDG2 [Vigna radiata var…	gi|571494318|ref|XM_006592754.1|	1909	0	PREDICTED: Glycine max homeobox-leucine zipper protein HDG2-like (LOC100797992), transcript variant X3, mRNA	Q94C37	1154	0	HDG2_ARATH Homeobox-leucine zipper protein HDG2 OS=Arabidopsis thaliana GN=HDG2 PE=2 SV=1	SPBC21B10.13c	52.4	8e-07	COG5576	Homeodomain-containing transcription factor	K09338	0	1095	ath:AT4G04890	homeobox-leucine zipper protein
CL3321.Contig5_All	1.3937	0.328	0.2442	0.358	0	0.0269	1.4773	0.7148	0.103	0.1297	1401	0	PREDICTED: homeobox-leucine zipper protein HDG2-like isoform X3 [Glycine max] >gi|947077958|gb|KRH26798.1| hypothetical protein GLYMA_12G194400 [Glycine max] >gi|947077959|gb|KRH26799.1| hypothetical protein GLYMA_12G194400 [Glycine max] >gi|947077960|gb|KRH26800.1| hypothetical protein GLYMA_12G194400 [Glycine max]	gi|571494322|ref|XM_003540260.2|	1986	0	PREDICTED: Glycine max homeobox-leucine zipper protein HDG2-like (LOC100797992), transcript variant X1, mRNA	Q94C37	1158	0	HDG2_ARATH Homeobox-leucine zipper protein HDG2 OS=Arabidopsis thaliana GN=HDG2 PE=2 SV=1	SPBC21B10.13c	57.4	2e-08	COG5576	Homeodomain-containing transcription factor	K09338	0	1105	ath:AT4G04890	homeobox-leucine zipper protein
CL3321.Contig6_All	0.1196	0	0.1257	0.059	0	0	0.5858	0.5887	0.0849	0.2404	1377.1	0	PREDICTED: homeobox-leucine zipper protein HDG2-like isoform X3 [Glycine max] >gi|947077958|gb|KRH26798.1| hypothetical protein GLYMA_12G194400 [Glycine max] >gi|947077959|gb|KRH26799.1| hypothetical protein GLYMA_12G194400 [Glycine max] >gi|947077960|gb|KRH26800.1| hypothetical protein GLYMA_12G194400 [Glycine max]	gi|571494322|ref|XM_003540260.2|	1953	0	PREDICTED: Glycine max homeobox-leucine zipper protein HDG2-like (LOC100797992), transcript variant X1, mRNA	Q94C37	1148	0	HDG2_ARATH Homeobox-leucine zipper protein HDG2 OS=Arabidopsis thaliana GN=HDG2 PE=2 SV=1	SPBC21B10.13c	52.4	1e-06	COG5576	Homeodomain-containing transcription factor	K09338	0	1091	ath:AT4G04890	homeobox-leucine zipper protein
CL3321.Contig7_All	1.3295	0.7492	0.6274	1.1041	0	0	2.3519	1.8496	0.353	0.3334	1429.8	0	homeodomain/HOMEOBOX transcription factor, partial [Glycine max]	gi|571502030|ref|XM_006594832.1|	2111	0	PREDICTED: Glycine max homeobox-leucine zipper protein HDG2-like (LOC100809556), transcript variant X2, mRNA	Q94C37	1169	0	HDG2_ARATH Homeobox-leucine zipper protein HDG2 OS=Arabidopsis thaliana GN=HDG2 PE=2 SV=1	SPBC21B10.13c	56.2	5e-08	COG5576	Homeodomain-containing transcription factor	K09338	0	1103	ath:AT4G04890	homeobox-leucine zipper protein
CL3321.Contig8_All	0.9062	0.9749	0.5103	0.2794	0	0	1.9516	1.8386	0.3445	0.4338	1384	0	PREDICTED: homeobox-leucine zipper protein HDG2-like isoform X3 [Glycine max] >gi|947077958|gb|KRH26798.1| hypothetical protein GLYMA_12G194400 [Glycine max] >gi|947077959|gb|KRH26799.1| hypothetical protein GLYMA_12G194400 [Glycine max] >gi|947077960|gb|KRH26800.1| hypothetical protein GLYMA_12G194400 [Glycine max]	gi|571494322|ref|XM_003540260.2|	1929	0	PREDICTED: Glycine max homeobox-leucine zipper protein HDG2-like (LOC100797992), transcript variant X1, mRNA	Q94C37	1162	0	HDG2_ARATH Homeobox-leucine zipper protein HDG2 OS=Arabidopsis thaliana GN=HDG2 PE=2 SV=1	SPBC21B10.13c	56.2	4e-08	COG5576	Homeodomain-containing transcription factor	K09338	0	1095	ath:AT4G04890	homeobox-leucine zipper protein
CL3323.Contig26_All	0.9869	2.4409	0.9763	1.3243	0.4568	0.3771	0.3829	0.5771	2.4721	1.5239	427.6	1e-137	Heat stress transcription factor A-3 [Glycine soja]	gi|41688349|dbj|AP006664.1|	238	3e-59	Lotus japonicus genomic DNA, chromosome 5, clone: LjT01C14, TM0359, complete sequence	Q8GYY1	175	3e-47	HSFA3_ARATH Heat stress transcription factor A-3 OS=Arabidopsis thaliana GN=HSFA3 PE=2 SV=2	--	--	--	--	--	--	--	--	--	--
CL335.Contig3_All	1.4557	2.5694	2.6778	1.2341	0.9686	0.8443	0.5572	0.3877	2.9058	1.9311	62	1e-08	SOC1 [Prunus armeniaca] >gi|444230590|gb|AGD88524.1| SOC1 [Prunus armeniaca]	gi|571479498|ref|XM_006587816.1|	165	3e-37	PREDICTED: Glycine max MADS-box protein SOC1-like (LOC100784678), transcript variant X3, mRNA	O64645	87	3e-19	SOC1_ARATH MADS-box protein SOC1 OS=Arabidopsis thaliana GN=SOC1 PE=1 SV=1	--	--	--	--	--	K09264	2e-07	53.9	bdi:100822235	MADS-box transcription factor, plant
CL3362.Contig2_All	0.1268	0.3183	0	0	0	0	0.7765	1.0804	0	0	339.3	7e-112	PREDICTED: probable transcription factor KAN4 [Glycine max] >gi|947103544|gb|KRH51927.1| hypothetical protein GLYMA_06G035700 [Glycine max]	gi|571448974|ref|XM_003523539.2|	321	1e-84	PREDICTED: Glycine max probable transcription factor KAN4-like (LOC100804354), transcript variant X1, mRNA	Q9FJV5	203	8e-62	KAN4_ARATH Probable transcription factor KAN4 OS=Arabidopsis thaliana GN=KAN4 PE=1 SV=1	--	--	--	--	--	K14491	5e-10	63.2	gmx:100809002	two-component response regulator ARR-B family
CL3366.Contig1_All	7.8482	32.1213	12.0157	20.1273	0.1053	1.4777	0.3215	0.2154	15.0689	39.5792	453.4	2e-156	NAC domain-containing protein 2 [Glycine max] >gi|734364932|gb|KHN17402.1| NAC domain-containing protein 2 [Glycine soja] >gi|918463779|gb|ALA09234.1| NAC transcription factor [Glycine max]	gi|357520116|ref|XM_003630299.1|	283	3e-73	Medicago truncatula NAC-domain protein (MTR_8g094580) mRNA, complete cds	Q39013	360	3e-122	NAC2_ARATH NAC domain-containing protein 2 OS=Arabidopsis thaliana GN=NAC002 PE=2 SV=2	--	--	--	--	--	--	--	--	--	--
CL3366.Contig4_All	0.9396	2.1505	1.0458	2.7944	0	0	0.0521	0.0523	1.373	2.6549	463	7e-160	NAC domain-containing protein 2 [Glycine max] >gi|734364932|gb|KHN17402.1| NAC domain-containing protein 2 [Glycine soja] >gi|918463779|gb|ALA09234.1| NAC transcription factor [Glycine max]	gi|357520116|ref|XM_003630299.1|	379	1e-102	Medicago truncatula NAC-domain protein (MTR_8g094580) mRNA, complete cds	Q39013	358	6e-121	NAC2_ARATH NAC domain-containing protein 2 OS=Arabidopsis thaliana GN=NAC002 PE=2 SV=2	--	--	--	--	--	--	--	--	--	--
CL3366.Contig5_All	2.5484	14.4574	11.8398	22.2488	0.3303	2.2702	1.2966	0.5791	8.4404	18.1053	463.4	2e-159	NAC domain-containing protein 2 [Glycine max] >gi|734364932|gb|KHN17402.1| NAC domain-containing protein 2 [Glycine soja] >gi|918463779|gb|ALA09234.1| NAC transcription factor [Glycine max]	gi|357520116|ref|XM_003630299.1|	379	1e-102	Medicago truncatula NAC-domain protein (MTR_8g094580) mRNA, complete cds	Q39013	357	5e-120	NAC2_ARATH NAC domain-containing protein 2 OS=Arabidopsis thaliana GN=NAC002 PE=2 SV=2	--	--	--	--	--	--	--	--	--	--
CL3366.Contig7_All	2.5158	10.8062	10.6366	20.4064	0.3623	1.5564	0.5268	0.2117	7.9357	15.4258	474.6	1e-164	NAC domain-containing protein 2 [Glycine max] >gi|734364932|gb|KHN17402.1| NAC domain-containing protein 2 [Glycine soja] >gi|918463779|gb|ALA09234.1| NAC transcription factor [Glycine max]	gi|570517652|gb|KF725688.1|	357	3e-95	Ammopiptanthus mongolicus NAC domain-containing protein (NAC2) mRNA, partial cds	Q39013	370	8e-126	NAC2_ARATH NAC domain-containing protein 2 OS=Arabidopsis thaliana GN=NAC002 PE=2 SV=2	--	--	--	--	--	--	--	--	--	--
CL3366.Contig8_All	13.481	65.8816	28.4012	47.3252	0.6903	3.9926	0.2703	0.4889	22.1894	76.9634	468.8	1e-162	NAC domain-containing protein 2 [Glycine max] >gi|734364932|gb|KHN17402.1| NAC domain-containing protein 2 [Glycine soja] >gi|918463779|gb|ALA09234.1| NAC transcription factor [Glycine max]	gi|357520116|ref|XM_003630299.1|	283	3e-73	Medicago truncatula NAC-domain protein (MTR_8g094580) mRNA, complete cds	Q39013	376	3e-128	NAC2_ARATH NAC domain-containing protein 2 OS=Arabidopsis thaliana GN=NAC002 PE=2 SV=2	--	--	--	--	--	--	--	--	--	--
CL337.Contig2_All	16.8062	10.7129	2.2628	0.2794	0.1049	0.035	38.7511	28.7505	0.9828	24.1319	984.2	0	PREDICTED: subtilisin-like protease Glyma18g48580 [Glycine max] >gi|947065630|gb|KRH14773.1| hypothetical protein GLYMA_14G048200 [Glycine max]	gi|571479166|ref|XM_003533520.2|	149	2e-32	PREDICTED: Glycine max subtilisin-like protease-like (LOC100803751), mRNA	I1N462	924	0	SBT1_SOYBN Subtilisin-like protease Glyma18g48580 OS=Glycine max GN=Glyma18g48580 PE=1 SV=3	BS_vpr	138	6e-33	COG1404	Subtilisin-like serine proteases	K08653	6e-06	51.6	bdi:100822086	membrane-bound transcription factor site-1 protease [EC:3.4.21.112]
CL337.Contig3_All	8.6685	11.8581	2.0476	0.4404	0.0601	0.3615	23.0955	17.0611	2.5347	10.2638	976.1	0	PREDICTED: subtilisin-like protease Glyma18g48580 [Glycine max] >gi|947065630|gb|KRH14773.1| hypothetical protein GLYMA_14G048200 [Glycine max]	gi|571479166|ref|XM_003533520.2|	196	1e-46	PREDICTED: Glycine max subtilisin-like protease-like (LOC100803751), mRNA	I1N462	926	0	SBT1_SOYBN Subtilisin-like protease Glyma18g48580 OS=Glycine max GN=Glyma18g48580 PE=1 SV=3	BS_vpr	137	2e-32	COG1404	Subtilisin-like serine proteases	K08653	3e-06	52.8	bdi:100822086	membrane-bound transcription factor site-1 protease [EC:3.4.21.112]
CL337.Contig4_All	21.3216	15.6684	14.604	0.7209	0.1592	0.0319	14.2246	9.1499	11.7156	54.1669	938.7	0	PREDICTED: subtilisin-like protease Glyma18g48580 isoform X1 [Glycine max] >gi|947065628|gb|KRH14771.1| hypothetical protein GLYMA_14G048000 [Glycine max]	gi|502106342|ref|XM_004492864.1|	234	5e-58	PREDICTED: Cicer arietinum subtilisin-like protease-like (LOC101505967), mRNA	I1N462	898	0	SBT1_SOYBN Subtilisin-like protease Glyma18g48580 OS=Glycine max GN=Glyma18g48580 PE=1 SV=3	BS_vpr	136	3e-32	COG1404	Subtilisin-like serine proteases	K08653	2e-07	56.2	bdi:100822086	membrane-bound transcription factor site-1 protease [EC:3.4.21.112]
CL337.Contig6_All	4.8815	3.2129	2.0337	0	0	0	10.0121	9.2159	0.8098	10.0083	219.9	1e-57	hypothetical protein LR48_Vigan03g032900 [Vigna angularis]	gi|502106342|ref|XM_004492864.1|	153	2e-33	PREDICTED: Cicer arietinum subtilisin-like protease-like (LOC101505967), mRNA	I1N462	702	0	SBT1_SOYBN Subtilisin-like protease Glyma18g48580 OS=Glycine max GN=Glyma18g48580 PE=1 SV=3	BS_vpr	121	2e-27	COG1404	Subtilisin-like serine proteases	K08653	3e-06	52.8	bdi:100822086	membrane-bound transcription factor site-1 protease [EC:3.4.21.112]
CL337.Contig7_All	27.5122	28.6675	22.576	1.0802	0.2102	0.0602	19.6862	12.9635	25.2904	63.3877	934.1	0	PREDICTED: subtilisin-like protease Glyma18g48580 isoform X1 [Glycine max] >gi|947065628|gb|KRH14771.1| hypothetical protein GLYMA_14G048000 [Glycine max]	gi|502106342|ref|XM_004492864.1|	244	5e-61	PREDICTED: Cicer arietinum subtilisin-like protease-like (LOC101505967), mRNA	I1N462	904	0	SBT1_SOYBN Subtilisin-like protease Glyma18g48580 OS=Glycine max GN=Glyma18g48580 PE=1 SV=3	BS_vpr	136	4e-32	COG1404	Subtilisin-like serine proteases	K08653	3e-07	56.2	bdi:100822086	membrane-bound transcription factor site-1 protease [EC:3.4.21.112]
CL337.Contig8_All	54.1631	26.4895	2.6703	0.1607	0.1206	0.0604	75.1838	73.056	1.0402	16.9544	946	0	PREDICTED: subtilisin-like protease Glyma18g48580 [Glycine max] >gi|947065630|gb|KRH14773.1| hypothetical protein GLYMA_14G048200 [Glycine max]	gi|502106342|ref|XM_004492864.1|	196	1e-46	PREDICTED: Cicer arietinum subtilisin-like protease-like (LOC101505967), mRNA	I1N462	887	0	SBT1_SOYBN Subtilisin-like protease Glyma18g48580 OS=Glycine max GN=Glyma18g48580 PE=1 SV=3	BS_vpr	135	7e-32	COG1404	Subtilisin-like serine proteases	K08653	9e-06	51.2	bdi:100822086	membrane-bound transcription factor site-1 protease [EC:3.4.21.112]
CL3407.Contig1_All	0	0	0.0695	0.7333	2.263	17.5968	0	0	0.0782	0	471.1	5e-164	hypothetical protein PHAVU_006G120800g [Phaseolus vulgaris] >gi|561020619|gb|ESW19390.1| hypothetical protein PHAVU_006G120800g [Phaseolus vulgaris]	gi|402794697|ref|NM_001252986.2|	440	1e-120	Glycine max uncharacterized LOC100791349 (LOC100791349), mRNA	Q9LDE1	330	6e-111	MY108_ARATH Transcription factor MYB108 OS=Arabidopsis thaliana GN=MYB108 PE=1 SV=1	ECU11g1690	115	2e-29	COG5147	Myb superfamily proteins, including transcription factors and mRNA splicing factors	K09422	2e-146	421	pop:POPTR_564352	myb proto-oncogene protein, plant
CL3471.Contig1_All	27.5448	13.7711	24.5177	1.3246	0.2131	0.0712	1.8796	1.0171	9.3481	25.113	219.9	4e-66	PREDICTED: transcription factor bHLH18-like [Vigna radiata var. radiata]	gi|357455382|ref|XM_003597924.1|	69.9	7e-09	Medicago truncatula Transcription factor bHLH18 (MTR_2g104550) mRNA, complete cds	Q8S3F1	147	5e-41	BH020_ARATH Transcription factor NAI1 OS=Arabidopsis thaliana GN=NAI1 PE=2 SV=1	--	--	--	--	--	K13422	7e-14	74.7	bdi:100836477	transcription factor MYC2
CL3471.Contig2_All	5.1279	2.3073	0.4068	0	0	0	2.1879	1.0077	0.4578	0.6485	217.6	1e-65	Transcription factor bHLH19 [Glycine soja]	gi|357455382|ref|XM_003597924.1|	69.9	5e-09	Medicago truncatula Transcription factor bHLH18 (MTR_2g104550) mRNA, complete cds	Q9T072	135	3e-37	BH025_ARATH Transcription factor bHLH25 OS=Arabidopsis thaliana GN=BHLH25 PE=2 SV=2	--	--	--	--	--	K13422	7e-14	73.6	bdi:100836477	transcription factor MYC2
CL3471.Contig3_All	3.7846	2.1112	1.5471	0	0	0	0.6603	0.8627	0.4974	1.6441	224.9	1e-67	PREDICTED: transcription factor bHLH18-like [Vigna radiata var. radiata]	gi|357455382|ref|XM_003597924.1|	69.9	8e-09	Medicago truncatula Transcription factor bHLH18 (MTR_2g104550) mRNA, complete cds	Q8S3F1	147	1e-40	BH020_ARATH Transcription factor NAI1 OS=Arabidopsis thaliana GN=NAI1 PE=2 SV=1	--	--	--	--	--	K13422	2e-13	73.6	bdi:100836477	transcription factor MYC2
CL3471.Contig4_All	0.8882	0.8361	2.0229	2.0081	0	0	39.6132	33.9211	1.6636	1.9018	224.6	2e-68	hypothetical protein LR48_Vigan05g224900 [Vigna angularis] >gi|965604290|dbj|BAT91466.1| hypothetical protein VIGAN_07006400 [Vigna angularis var. angularis]	gi|571514459|ref|XM_003547523.2|	73.8	5e-10	PREDICTED: Glycine max transcription factor bHLH18-like (LOC100809223), mRNA	Q8S3F1	140	5e-38	BH020_ARATH Transcription factor NAI1 OS=Arabidopsis thaliana GN=NAI1 PE=2 SV=1	--	--	--	--	--	K13422	1e-13	74.3	sbi:SORBI_01g028230	transcription factor MYC2
CL3471.Contig5_All	1.0352	0.7218	0.8463	1.702	0	0	35.1664	36.1563	0.3401	1.9273	207.6	1e-59	PREDICTED: transcription factor bHLH18-like [Glycine max] >gi|947095927|gb|KRH44512.1| hypothetical protein GLYMA_08G215600 [Glycine max]	gi|571514459|ref|XM_003547523.2|	73.8	6e-10	PREDICTED: Glycine max transcription factor bHLH18-like (LOC100809223), mRNA	Q1PF17	130	1e-33	BH018_ARATH Transcription factor bHLH18 OS=Arabidopsis thaliana GN=BHLH18 PE=2 SV=1	--	--	--	--	--	K13422	5e-14	76.3	bdi:100836477	transcription factor MYC2
CL3471.Contig7_All	1.9347	0.8616	2.8864	2.3087	0	0.0579	43.278	45.0865	1.7717	2.6492	226.1	2e-67	hypothetical protein LR48_Vigan406s007400 [Vigna angularis] >gi|965612467|dbj|BAT98606.1| hypothetical protein VIGAN_09227300 [Vigna angularis var. angularis]	gi|571514459|ref|XM_003547523.2|	75.8	1e-10	PREDICTED: Glycine max transcription factor bHLH18-like (LOC100809223), mRNA	Q8S3F1	142	4e-38	BH020_ARATH Transcription factor NAI1 OS=Arabidopsis thaliana GN=NAI1 PE=2 SV=1	--	--	--	--	--	K13422	4e-15	79.3	bdi:100836477	transcription factor MYC2
CL3560.Contig4_All	1.6221	1.4897	1.2476	2.1466	3.0764	7.0858	0.2609	0.1498	1.6848	2.2098	180.6	7e-49	NAC transcription factor [Hevea brasiliensis]	gi|189162445|dbj|AP009668.1|	375	1e-100	Lotus japonicus genomic DNA, chromosome 6, clone: LjT04E21, TM0336, complete sequence	F4HY61	213	7e-63	NAC10_ARATH NAC domain-containing protein 10 OS=Arabidopsis thaliana GN=NAC010 PE=2 SV=1	--	--	--	--	--	--	--	--	--	--
CL3679.Contig3_All	0.0638	0.4807	1.8787	2.3614	0	0	0	0	0.2265	1.0696	79.3	7e-58	Myb-related protein Zm1 [Glycine soja]	gi|189162527|dbj|AP009750.1|	143	7e-31	Lotus japonicus genomic DNA, chromosome 3, clone: LjT47O18, TM1899, complete sequence	Q9SCU7	72.8	1e-32	MYB30_ARATH Transcription factor MYB30 OS=Arabidopsis thaliana GN=MYB30 PE=1 SV=1	ECU11g1690	49.7	4e-08	COG5147	Myb superfamily proteins, including transcription factors and mRNA splicing factors	K09422	6e-38	75.1	pop:POPTR_832837	myb proto-oncogene protein, plant
CL3679.Contig4_All	0	0.6855	1.6505	2.1047	0	0	0	0	0.323	1.144	122.9	5e-70	PREDICTED: myb-related protein Myb4-like [Vigna radiata var. radiata]	gi|302398928|gb|HM122620.1|	178	1e-41	Malus x domestica MYB domain class transcription factor (MYB25) mRNA, complete cds	Q7XBH4	123	3e-39	MYB4_ORYSJ Myb-related protein Myb4 OS=Oryza sativa subsp. japonica GN=MYB4 PE=2 SV=2	ECU11g1690	68.2	6e-19	COG5147	Myb superfamily proteins, including transcription factors and mRNA splicing factors	K09422	2e-57	158	pop:POPTR_834662	myb proto-oncogene protein, plant
CL3679.Contig5_All	0.1507	3.8775	6.5738	18.583	0.0697	0	0	0	1.3369	5.1344	283.5	1e-91	PREDICTED: myb-related protein Myb4-like [Vigna radiata var. radiata]	gi|571462635|ref|XM_003526255.2|	208	1e-50	PREDICTED: Glycine max MYB transcription factor MYB117 (MYB117), mRNA	Q7XBH4	174	1e-51	MYB4_ORYSJ Myb-related protein Myb4 OS=Oryza sativa subsp. japonica GN=MYB4 PE=2 SV=2	ECU11g1690	107	2e-26	COG5147	Myb superfamily proteins, including transcription factors and mRNA splicing factors	K09422	3e-75	236	pop:POPTR_834662	myb proto-oncogene protein, plant
CL3679.Contig6_All	0.2074	3.1241	1.2355	4.3482	0	0.0642	0	0	1.6357	4.8658	77.4	7e-14	Myb-related protein Myb4 [Glycine soja]	gi|571462635|ref|XM_003526255.2|	186	5e-44	PREDICTED: Glycine max MYB transcription factor MYB117 (MYB117), mRNA	P81393	81.6	2e-17	MYB08_ANTMA Myb-related protein 308 OS=Antirrhinum majus GN=MYB308 PE=2 SV=1	ECU11g1690	54.3	7e-08	COG5147	Myb superfamily proteins, including transcription factors and mRNA splicing factors	K09422	5e-26	107	pop:POPTR_665990	myb proto-oncogene protein, plant
CL3694.Contig1_All	5.8254	4.6643	2.5338	2.3532	0.8368	0.7456	8.0438	6.6569	2.2573	5.0489	233.4	6e-75	PREDICTED: myb-related protein 308-like [Populus euphratica] >gi|743913146|ref|XP_011000471.1| PREDICTED: myb-related protein 308-like [Populus euphratica] >gi|743936261|ref|XP_011012518.1| PREDICTED: myb-related protein 308-like [Populus euphratica] >gi|743936263|ref|XP_011012519.1| PREDICTED: myb-related protein 308-like [Populus euphratica]	gi|301072402|gb|GQ867222.1|	176	3e-41	Fragaria chiloensis transcription factor (MYB1) mRNA, complete cds	P81393	203	1e-64	MYB08_ANTMA Myb-related protein 308 OS=Antirrhinum majus GN=MYB308 PE=2 SV=1	ECU11g1690	104	2e-26	COG5147	Myb superfamily proteins, including transcription factors and mRNA splicing factors	K09422	1e-74	228	pop:POPTR_775912	myb proto-oncogene protein, plant
CL3703.Contig6_All	2.3244	4.069	1.9932	7.9199	0.0566	0.0568	0.0576	0.2317	0.8683	1.3666	70.1	2e-10	General transcription factor 3C polypeptide 2 [Aegilops tauschii]	--	--	--	--	--	--	--	--	--	--	--	--	--	--	--	--	--	--
CL3704.Contig2_All	13.0713	24.4717	24.4859	32.5074	1.1492	0.8132	1.0321	0.5531	22.5448	20.2303	392.9	1e-133	PREDICTED: probable WRKY transcription factor 69 [Cicer arietinum]	gi|351724940|ref|NM_001250658.1|	299	4e-78	Glycine max transcription factor (WRKY16), mRNA >gi|166203237|gb|EU375351.1| Glycine max transcription factor (WRKY16) mRNA, complete cds	Q93WV5	229	6e-73	WRK69_ARATH Probable WRKY transcription factor 69 OS=Arabidopsis thaliana GN=WRKY69 PE=2 SV=1	--	--	--	--	--	K13425	8e-35	133	vvi:100256849	WRKY transcription factor 22
CL3713.Contig3_All	0.0704	7.8588	7.0253	17.0905	0	0.1306	0	0	0.6657	3.065	172.2	7e-49	unknown [Glycine max]	gi|571438137|ref|XM_006574427.1|	115	1e-22	PREDICTED: Glycine max transcription factor bHLH92-like (LOC100815874), mRNA	Q9FIX5	87	3e-19	BH092_ARATH Transcription factor bHLH92 OS=Arabidopsis thaliana GN=BHLH92 PE=2 SV=1	--	--	--	--	--	--	--	--	--	--
CL3713.Contig5_All	0	2.1572	1.7397	3.0614	0	0.0591	0	0	0.753	0.7822	222.6	8e-68	unknown [Glycine max]	gi|571438137|ref|XM_006574427.1|	115	2e-22	PREDICTED: Glycine max transcription factor bHLH92-like (LOC100815874), mRNA	Q9FIX5	125	9e-33	BH092_ARATH Transcription factor bHLH92 OS=Arabidopsis thaliana GN=BHLH92 PE=2 SV=1	--	--	--	--	--	--	--	--	--	--
CL3769.Contig1_All	2.4634	0.9662	0.4046	0.3797	0	0	1.6683	1.6036	0.4553	0.774	108.2	5e-27	Homeodomain-like superfamily protein [Theobroma cacao] >gi|508709543|gb|EOY01440.1| Homeodomain-like superfamily protein [Theobroma cacao]	gi|571494329|ref|XM_003540266.2|	186	4e-44	PREDICTED: Glycine max MYB-like transcription factor ETC1-like (LOC100801532), transcript variant X1, mRNA	O22059	71.2	3e-15	CPC_ARATH Transcription factor CPC OS=Arabidopsis thaliana GN=CPC PE=1 SV=1	--	--	--	--	--	K09422	2e-14	69.7	aly:ARALYDRAFT_677769	myb proto-oncogene protein, plant
CL3769.Contig3_All	21.2283	12.5125	6.4106	6.5082	0.8685	1.5237	14.3657	18.5452	7.769	8.647	129.4	2e-36	Homeodomain-like superfamily protein [Theobroma cacao] >gi|508709543|gb|EOY01440.1| Homeodomain-like superfamily protein [Theobroma cacao]	gi|571494329|ref|XM_003540266.2|	194	1e-46	PREDICTED: Glycine max MYB-like transcription factor ETC1-like (LOC100801532), transcript variant X1, mRNA	O22059	72	4e-16	CPC_ARATH Transcription factor CPC OS=Arabidopsis thaliana GN=CPC PE=1 SV=1	--	--	--	--	--	K09422	5e-15	70.1	pop:POPTR_772352	myb proto-oncogene protein, plant
CL3769.Contig4_All	19.1441	10.4204	4.9281	6.9858	0.1808	0.1813	8.9268	12.3001	4.1593	6.7648	129.4	8e-36	Homeodomain-like superfamily protein [Theobroma cacao] >gi|508709543|gb|EOY01440.1| Homeodomain-like superfamily protein [Theobroma cacao]	gi|571494329|ref|XM_003540266.2|	186	3e-44	PREDICTED: Glycine max MYB-like transcription factor ETC1-like (LOC100801532), transcript variant X1, mRNA	O22059	72	7e-16	CPC_ARATH Transcription factor CPC OS=Arabidopsis thaliana GN=CPC PE=1 SV=1	--	--	--	--	--	K09422	9e-15	70.1	pop:POPTR_772352	myb proto-oncogene protein, plant
CL378.Contig10_All	3.3031	3.9154	2.3146	3.96	0	0	2.8528	2.9537	1.9536	1.6399	37.7	1e-16	hypothetical protein PHAVU_008G270400g [Phaseolus vulgaris] >gi|561015452|gb|ESW14313.1| hypothetical protein PHAVU_008G270400g [Phaseolus vulgaris]	gi|357515204|ref|XM_003627843.1|	73.8	4e-10	Medicago truncatula Zinc finger protein (MTR_8g039640) mRNA, complete cds	Q84MZ4	46.6	1e-10	TF3A_ARATH Transcription factor IIIA OS=Arabidopsis thaliana GN=TFIIIA PE=1 SV=1	--	--	--	--	--	K09191	4e-17	69.3	gmx:100801812	general transcription factor IIIA
CL378.Contig13_All	1.0102	1.5349	2.6826	1.1802	0	0	1.1021	0.8558	1.3836	1.3067	594.3	0	hypothetical protein PHAVU_008G270400g [Phaseolus vulgaris] >gi|561015452|gb|ESW14313.1| hypothetical protein PHAVU_008G270400g [Phaseolus vulgaris]	gi|571442285|ref|XM_003518481.2|	466	1e-128	PREDICTED: Glycine max zinc finger protein 84-like (LOC100801812), mRNA	Q84MZ4	452	1e-155	TF3A_ARATH Transcription factor IIIA OS=Arabidopsis thaliana GN=TFIIIA PE=1 SV=1	SPAC144.09c	126	4e-31	COG5048	FOG: Zn-finger	K09191	0	590	gmx:100801812	general transcription factor IIIA
CL3812.Contig3_All	0.4833	0.3791	1.2699	2.6816	1.5657	3.5876	0.3984	0.2288	1.2862	0.7423	213.8	9e-64	PREDICTED: ethylene-responsive transcription factor ERF113-like [Glycine max] >gi|947057410|gb|KRH06816.1| hypothetical protein GLYMA_16G047600 [Glycine max] >gi|947057411|gb|KRH06817.1| hypothetical protein GLYMA_16G047600 [Glycine max]	gi|571530649|ref|XM_003548806.2|	204	2e-49	PREDICTED: Glycine max ethylene-responsive transcription factor ERF113-like (LOC100816370), mRNA	Q9LYU3	150	2e-42	EF113_ARATH Ethylene-responsive transcription factor ERF113 OS=Arabidopsis thaliana GN=ERF113 PE=2 SV=1	--	--	--	--	--	K09286	3e-29	115	ath:AT1G43160	EREBP-like factor
CL3828.Contig3_All	0.1521	0.0954	0	0.0938	0	0	1.3611	0.7199	0	0	94.7	9e-20	hypothetical protein GLYMA_04G205100 [Glycine max]	gi|147773759|emb|AM447361.2|	153	6e-34	Vitis vinifera contig VV78X015601.2, whole genome shotgun sequence	P81395	112	3e-28	MYB30_ANTMA Myb-related protein 330 OS=Antirrhinum majus GN=MYB330 PE=2 SV=1	ECU11g1690	52	4e-07	COG5147	Myb superfamily proteins, including transcription factors and mRNA splicing factors	K09422	8e-49	169	pop:POPTR_582164	myb proto-oncogene protein, plant
CL3828.Contig4_All	0.4576	0.4102	0.2749	0.8061	0.0605	0.4246	3.326	3.3423	0.3866	0.3651	157.5	2e-42	hypothetical protein GLYMA_04G205100 [Glycine max]	gi|375298665|ref|NM_001248733.1|	325	8e-86	Glycine max MYB transcription factor MYB56 (MYB56), mRNA	P81395	183	2e-54	MYB30_ANTMA Myb-related protein 330 OS=Antirrhinum majus GN=MYB330 PE=2 SV=1	ECU11g1690	68.6	1e-12	COG5147	Myb superfamily proteins, including transcription factors and mRNA splicing factors	K09422	5e-57	191	rcu:RCOM_1762610	myb proto-oncogene protein, plant
CL3828.Contig5_All	1.1111	0.5977	1.0011	1.8595	0.0735	1.5466	5.6832	5.7112	1.7837	0.9752	457.6	2e-160	Myb-related protein 308 [Glycine soja]	gi|363808125|ref|NM_001255548.1|	420	1e-114	Glycine max myb-related protein 308-like (LOC100808083), mRNA	P81395	290	6e-97	MYB30_ANTMA Myb-related protein 330 OS=Antirrhinum majus GN=MYB330 PE=2 SV=1	ECU11g1690	108	3e-27	COG5147	Myb superfamily proteins, including transcription factors and mRNA splicing factors	K09422	1e-117	345	pop:POPTR_582164	myb proto-oncogene protein, plant
CL3828.Contig6_All	1.5565	0.4884	1.2271	1.6315	0.072	0.3611	7.6995	9.1375	0.5524	0.9563	419.9	2e-145	Myb-related protein 308 [Glycine soja]	gi|375298665|ref|NM_001248733.1|	418	1e-114	Glycine max MYB transcription factor MYB56 (MYB56), mRNA	P81395	287	9e-96	MYB30_ANTMA Myb-related protein 330 OS=Antirrhinum majus GN=MYB330 PE=2 SV=1	ECU11g1690	108	3e-27	COG5147	Myb superfamily proteins, including transcription factors and mRNA splicing factors	K09422	2e-118	347	pop:POPTR_582164	myb proto-oncogene protein, plant
CL3833.Contig1_All	2.2753	13.97	2.8441	1.8199	0.1708	0.1141	0	0	10.1108	17.2421	381.7	1e-128	uncharacterized protein LOC100780763 [Glycine max]	gi|292786712|dbj|AK338500.1|	198	1e-47	Lotus japonicus cDNA, clone: LjFL2-024-AG06, HTC	Q9LUM4	151	4e-41	RAP22_ARATH Ethylene-responsive transcription factor RAP2-2 OS=Arabidopsis thaliana GN=RAP2-2 PE=1 SV=2	--	--	--	--	--	K09286	7e-50	176	vvi:100248027	EREBP-like factor
CL3833.Contig3_All	10.9271	74.6254	19.999	22.8276	1.1305	0.8947	0.4845	0.2434	33.1501	99.5908	397.5	3e-135	uncharacterized protein LOC100780763 [Glycine max]	gi|292786712|dbj|AK338500.1|	198	1e-47	Lotus japonicus cDNA, clone: LjFL2-024-AG06, HTC	P42736	145	3e-40	RAP23_ARATH Ethylene-responsive transcription factor RAP2-3 OS=Arabidopsis thaliana GN=RAP2-3 PE=1 SV=2	--	--	--	--	--	K09286	4e-53	184	vvi:100248027	EREBP-like factor
CL3884.Contig2_All	0.4166	1.6433	0.8758	1.9814	0.1102	0	0.0561	0.0563	1.7599	2.9916	345.5	3e-114	PREDICTED: GATA transcription factor 7-like [Glycine max] >gi|947112479|gb|KRH60781.1| hypothetical protein GLYMA_04G008900 [Glycine max] >gi|947112480|gb|KRH60782.1| hypothetical protein GLYMA_04G008900 [Glycine max]	gi|571458300|ref|XM_003527087.2|	224	3e-55	PREDICTED: Glycine max GATA transcription factor 5-like (LOC100780311), mRNA	Q9FH57	224	1e-68	GATA5_ARATH GATA transcription factor 5 OS=Arabidopsis thaliana GN=GATA5 PE=2 SV=1	YMR136w	52.8	1e-06	COG5641	GATA Zn-finger-containing transcription factor	--	--	--	--	--
CL3884.Contig4_All	0.1094	0.5491	0.5173	0.3371	0.1519	0.0507	0.0515	0.0518	0.9055	1.0995	364	8e-121	PREDICTED: GATA transcription factor 7-like [Glycine max] >gi|947112479|gb|KRH60781.1| hypothetical protein GLYMA_04G008900 [Glycine max] >gi|947112480|gb|KRH60782.1| hypothetical protein GLYMA_04G008900 [Glycine max]	gi|571458300|ref|XM_003527087.2|	224	3e-55	PREDICTED: Glycine max GATA transcription factor 5-like (LOC100780311), mRNA	Q9FH57	243	2e-75	GATA5_ARATH GATA transcription factor 5 OS=Arabidopsis thaliana GN=GATA5 PE=2 SV=1	YMR136w	55.8	2e-07	COG5641	GATA Zn-finger-containing transcription factor	--	--	--	--	--
CL3884.Contig5_All	0.4204	2.1105	0.6312	1.4811	0.0556	0	0.1697	0.0569	3.1966	2.8846	364	1e-121	PREDICTED: GATA transcription factor 7-like [Glycine max] >gi|947112479|gb|KRH60781.1| hypothetical protein GLYMA_04G008900 [Glycine max] >gi|947112480|gb|KRH60782.1| hypothetical protein GLYMA_04G008900 [Glycine max]	gi|571458300|ref|XM_003527087.2|	224	3e-55	PREDICTED: Glycine max GATA transcription factor 5-like (LOC100780311), mRNA	Q9FH57	243	6e-76	GATA5_ARATH GATA transcription factor 5 OS=Arabidopsis thaliana GN=GATA5 PE=2 SV=1	YMR136w	55.8	1e-07	COG5641	GATA Zn-finger-containing transcription factor	--	--	--	--	--
CL3884.Contig6_All	6.5335	9.0044	8.2142	14.6127	0.7115	0.8916	4.7075	2.4866	15.0779	21.3231	383.6	1e-129	PREDICTED: GATA transcription factor 7-like [Vigna radiata var. radiata] >gi|950940160|ref|XP_014492528.1| PREDICTED: GATA transcription factor 7-like [Vigna radiata var. radiata]	gi|571458300|ref|XM_003527087.2|	198	1e-47	PREDICTED: Glycine max GATA transcription factor 5-like (LOC100780311), mRNA	Q9FH57	227	3e-70	GATA5_ARATH GATA transcription factor 5 OS=Arabidopsis thaliana GN=GATA5 PE=2 SV=1	YFL021w	56.2	8e-08	COG5641	GATA Zn-finger-containing transcription factor	K11323	2e-06	51.6	vcn:VOLCADRAFT_121342	histone arginine demethylase JMJD6 [EC:1.14.11.-]
CL3884.Contig7_All	18.6974	27.5166	18.3388	28.4958	1.1579	2.6881	9.6769	5.6726	42.3647	55.7466	383.6	6e-130	PREDICTED: GATA transcription factor 7-like [Vigna radiata var. radiata] >gi|950940160|ref|XP_014492528.1| PREDICTED: GATA transcription factor 7-like [Vigna radiata var. radiata]	gi|502130799|ref|XM_004500716.1|	184	2e-43	PREDICTED: Cicer arietinum GATA transcription factor 5-like (LOC101509846), mRNA	Q9FH57	227	2e-70	GATA5_ARATH GATA transcription factor 5 OS=Arabidopsis thaliana GN=GATA5 PE=2 SV=1	YFL021w	56.2	8e-08	COG5641	GATA Zn-finger-containing transcription factor	K11323	2e-06	51.6	vcn:VOLCADRAFT_121342	histone arginine demethylase JMJD6 [EC:1.14.11.-]
CL3892.Contig1_All	14.4163	9.5563	7.0192	9.158	21.6642	15.3471	8.5262	8.9819	2.9529	4.8104	511.5	1e-179	hypothetical protein LR48_Vigan10g227600 [Vigna angularis] >gi|965613679|dbj|BAT99311.1| hypothetical protein VIGAN_10071900 [Vigna angularis var. angularis]	gi|15148917|gb|AF402605.1|AF402605	462	1e-127	Phaseolus vulgaris homeodomain leucine zipper protein HDZ2 mRNA, complete cds	Q02283	162	4e-46	HAT5_ARATH Homeobox-leucine zipper protein HAT5 OS=Arabidopsis thaliana GN=HAT5 PE=1 SV=1	ECU03g1170	53.5	2e-07	COG5576	Homeodomain-containing transcription factor	K09338	9e-46	162	ath:AT3G01470	homeobox-leucine zipper protein
CL3892.Contig2_All	12.5471	12.3179	15.1475	13.7106	32.142	28.878	8.6617	7.4692	4.4819	5.8979	529.2	0	hypothetical protein LR48_Vigan10g227600 [Vigna angularis] >gi|965613679|dbj|BAT99311.1| hypothetical protein VIGAN_10071900 [Vigna angularis var. angularis]	gi|15148917|gb|AF402605.1|AF402605	492	1e-136	Phaseolus vulgaris homeodomain leucine zipper protein HDZ2 mRNA, complete cds	Q02283	156	4e-44	HAT5_ARATH Homeobox-leucine zipper protein HAT5 OS=Arabidopsis thaliana GN=HAT5 PE=1 SV=1	ECU03g1170	55.5	4e-08	COG5576	Homeodomain-containing transcription factor	K09338	1e-43	156	ath:AT3G01470	homeobox-leucine zipper protein
CL3892.Contig3_All	1.4619	1.0756	2.1725	3.2325	3.6865	3.4617	0.665	0.7637	0.1789	0.1689	174.1	7e-47	Homeobox-leucine zipper protein HAT5 [Glycine soja]	gi|15148917|gb|AF402605.1|AF402605	398	1e-108	Phaseolus vulgaris homeodomain leucine zipper protein HDZ2 mRNA, complete cds	Q02283	145	3e-39	HAT5_ARATH Homeobox-leucine zipper protein HAT5 OS=Arabidopsis thaliana GN=HAT5 PE=1 SV=1	ECU03g1170	53.5	3e-07	COG5576	Homeodomain-containing transcription factor	K09338	6e-39	145	aly:ARALYDRAFT_477377	homeobox-leucine zipper protein
CL3892.Contig4_All	29.6828	20.204	9.7202	12.5998	1.3739	0.6886	19.8461	20.6464	11.4112	14.6023	498.8	8e-174	hypothetical protein LR48_Vigan10g227600 [Vigna angularis] >gi|965613679|dbj|BAT99311.1| hypothetical protein VIGAN_10071900 [Vigna angularis var. angularis]	gi|15148917|gb|AF402605.1|AF402605	389	1e-105	Phaseolus vulgaris homeodomain leucine zipper protein HDZ2 mRNA, complete cds	Q02283	158	2e-44	HAT5_ARATH Homeobox-leucine zipper protein HAT5 OS=Arabidopsis thaliana GN=HAT5 PE=1 SV=1	ECU03g1170	53.1	3e-07	COG5576	Homeodomain-containing transcription factor	K09338	5e-44	158	ath:AT3G01470	homeobox-leucine zipper protein
CL3892.Contig5_All	9.5002	6.6523	9.3028	8.5705	34.4829	25.1023	5.1823	6.0126	2.1884	3.3513	516.5	1e-179	hypothetical protein LR48_Vigan10g227600 [Vigna angularis] >gi|965613679|dbj|BAT99311.1| hypothetical protein VIGAN_10071900 [Vigna angularis var. angularis]	gi|15148917|gb|AF402605.1|AF402605	454	1e-124	Phaseolus vulgaris homeodomain leucine zipper protein HDZ2 mRNA, complete cds	Q02283	155	9e-43	HAT5_ARATH Homeobox-leucine zipper protein HAT5 OS=Arabidopsis thaliana GN=HAT5 PE=1 SV=1	ECU03g1170	55.8	4e-08	COG5576	Homeodomain-containing transcription factor	K09338	1e-43	158	aly:ARALYDRAFT_477377	homeobox-leucine zipper protein
CL3897.Contig1_All	0.4654	1.4603	2.2829	4.9737	0.8616	0.9357	0	0	1.1927	2.946	141	1e-73	MYB transcription factor MYB76 [Glycine max] >gi|110931674|gb|ABH02836.1| MYB transcription factor MYB76 [Glycine max]	gi|351723950|ref|NM_001248832.1|	258	1e-65	Glycine max MYB transcription factor MYB76 (MYB76), mRNA >gi|110931673|gb|DQ822895.1| Glycine max MYB transcription factor MYB76 (MYB76) mRNA, complete cds	Q9LDE1	145	1e-62	MY108_ARATH Transcription factor MYB108 OS=Arabidopsis thaliana GN=MYB108 PE=1 SV=1	ECU11g1690	68.9	1e-19	COG5147	Myb superfamily proteins, including transcription factors and mRNA splicing factors	K09422	4e-66	145	rcu:RCOM_1345780	myb proto-oncogene protein, plant
CL3897.Contig2_All	0	0	0.067	0.0786	0.7081	0.5324	0	0	0	0.0712	303.9	5e-99	PREDICTED: transcription factor MYB108 [Ricinus communis] >gi|223545715|gb|EEF47219.1| r2r3-myb transcription factor, putative [Ricinus communis]	gi|502117623|ref|XM_004495825.1|	317	2e-83	PREDICTED: Cicer arietinum protein ODORANT1-like (LOC101495438), mRNA	Q9LDE1	251	8e-80	MY108_ARATH Transcription factor MYB108 OS=Arabidopsis thaliana GN=MYB108 PE=1 SV=1	ECU11g1690	110	2e-27	COG5147	Myb superfamily proteins, including transcription factors and mRNA splicing factors	K09422	1e-100	303	rcu:RCOM_1345780	myb proto-oncogene protein, plant
CL3897.Contig3_All	0.0485	0.1826	1.4785	2.6317	3.2328	2.1155	0	0	0.2295	1.1378	60.8	7e-08	PREDICTED: transcription factor MYB108-like [Cicer arietinum]	gi|502117623|ref|XM_004495825.1|	165	2e-37	PREDICTED: Cicer arietinum protein ODORANT1-like (LOC101495438), mRNA	Q9LDE1	110	3e-46	MY108_ARATH Transcription factor MYB108 OS=Arabidopsis thaliana GN=MYB108 PE=1 SV=1	ECU11g1690	51.2	5e-14	COG5147	Myb superfamily proteins, including transcription factors and mRNA splicing factors	K09422	2e-60	157	rcu:RCOM_1345780	myb proto-oncogene protein, plant
CL3897.Contig4_All	0.1023	0	1.075	1.5765	1.5148	1.6134	0	0	0.3629	0.6855	154.5	3e-76	PREDICTED: transcription factor MYB108 [Ricinus communis] >gi|223545715|gb|EEF47219.1| r2r3-myb transcription factor, putative [Ricinus communis]	gi|571446744|ref|XM_003520714.2|	240	5e-60	PREDICTED: Glycine max transcription factor MYB108-like (LOC100797220), mRNA	Q9LDE1	149	2e-62	MY108_ARATH Transcription factor MYB108 OS=Arabidopsis thaliana GN=MYB108 PE=1 SV=1	ECU11g1690	71.2	6e-20	COG5147	Myb superfamily proteins, including transcription factors and mRNA splicing factors	K09422	8e-78	157	rcu:RCOM_1345780	myb proto-oncogene protein, plant
CL3897.Contig5_All	0.0902	0.1698	0.8058	2.8914	1.5444	1.7156	0	0	0.48	0.8563	303.9	1e-96	PREDICTED: transcription factor MYB108 [Ricinus communis] >gi|223545715|gb|EEF47219.1| r2r3-myb transcription factor, putative [Ricinus communis]	gi|502117623|ref|XM_004495825.1|	317	3e-83	PREDICTED: Cicer arietinum protein ODORANT1-like (LOC101495438), mRNA	Q9LDE1	251	1e-77	MY108_ARATH Transcription factor MYB108 OS=Arabidopsis thaliana GN=MYB108 PE=1 SV=1	ECU11g1690	110	6e-27	COG5147	Myb superfamily proteins, including transcription factors and mRNA splicing factors	K09422	3e-98	303	rcu:RCOM_1345780	myb proto-oncogene protein, plant
CL3947.Contig1_All	2.9705	3.3646	1.98	1.0721	3.4875	0	2.2527	1.715	6.5989	6.7175	389	5e-132	hypothetical protein PHAVU_005G025700g [Phaseolus vulgaris] >gi|561022189|gb|ESW20919.1| hypothetical protein PHAVU_005G025700g [Phaseolus vulgaris]	gi|571521061|ref|XM_003545783.2|	208	1e-50	PREDICTED: Glycine max uncharacterized LOC100793978 (LOC100793978), mRNA	Q9LJG8	92.4	3e-20	ASIL2_ARATH Trihelix transcription factor ASIL2 OS=Arabidopsis thaliana GN=ASIL2 PE=2 SV=1	--	--	--	--	--	--	--	--	--	--
CL396.Contig11_All	0	0	0	0.1099	0.5363	0.2895	0	0	0	0	163.7	6e-43	unknown [Glycine max]	gi|351728065|ref|NM_001250509.1|	222	1e-54	Glycine max WRKY54 (LOC732591), mRNA >gi|83630942|gb|DQ322698.1| Glycine max WRKY54 mRNA, complete cds	O22900	169	7e-47	WRK23_ARATH Probable WRKY transcription factor 23 OS=Arabidopsis thaliana GN=WRKY23 PE=2 SV=1	--	--	--	--	--	K13424	7e-21	98.6	sbi:SORBI_09g023270	WRKY transcription factor 33
CL396.Contig12_All	3.1032	2.7174	2.5792	3.2037	1.3361	0.4018	0.272	0.0683	1.7073	1.2093	236.5	1e-72	hypothetical protein PHAVU_007G212900g [Phaseolus vulgaris] >gi|561018324|gb|ESW17128.1| hypothetical protein PHAVU_007G212900g [Phaseolus vulgaris]	gi|351728065|ref|NM_001250509.1|	204	2e-49	Glycine max WRKY54 (LOC732591), mRNA >gi|83630942|gb|DQ322698.1| Glycine max WRKY54 mRNA, complete cds	O22900	150	8e-42	WRK23_ARATH Probable WRKY transcription factor 23 OS=Arabidopsis thaliana GN=WRKY23 PE=2 SV=1	--	--	--	--	--	K13424	4e-17	84.7	zma:100281160	WRKY transcription factor 33
CL396.Contig13_All	0.759	0.0733	0.3682	0.8639	9.1875	8.9392	0.055	0	0.3453	0.4565	421.4	1e-143	hypothetical protein LR48_Vigan02g146800 [Vigna angularis] >gi|965608774|dbj|BAT95265.1| hypothetical protein VIGAN_08195600 [Vigna angularis var. angularis]	gi|351728065|ref|NM_001250509.1|	410	1e-111	Glycine max WRKY54 (LOC732591), mRNA >gi|83630942|gb|DQ322698.1| Glycine max WRKY54 mRNA, complete cds	O22900	243	4e-76	WRK23_ARATH Probable WRKY transcription factor 23 OS=Arabidopsis thaliana GN=WRKY23 PE=2 SV=1	--	--	--	--	--	K13424	4e-29	121	zma:100281160	WRKY transcription factor 33
CL396.Contig1_All	5.0216	4.7271	4.9642	5.6763	0.9961	0.7212	0.9575	0.5094	4.455	5.2089	456.1	1e-157	hypothetical protein LR48_Vigan02g146800 [Vigna angularis] >gi|965608774|dbj|BAT95265.1| hypothetical protein VIGAN_08195600 [Vigna angularis var. angularis]	gi|351727594|ref|NM_001250493.1|	446	1e-122	Glycine max WRKY86 (LOC732590), mRNA >gi|83630940|gb|DQ322697.1| Glycine max WRKY51 mRNA, complete cds	O22900	258	6e-82	WRK23_ARATH Probable WRKY transcription factor 23 OS=Arabidopsis thaliana GN=WRKY23 PE=2 SV=1	--	--	--	--	--	K13424	2e-28	119	zma:100281160	WRKY transcription factor 33
CL396.Contig2_All	0.1339	0.1681	0.0938	0.6054	2.7682	3.3135	0.0421	0	0.0528	0	163.7	6e-43	unknown [Glycine max]	gi|351728065|ref|NM_001250509.1|	396	1e-107	Glycine max WRKY54 (LOC732591), mRNA >gi|83630942|gb|DQ322698.1| Glycine max WRKY54 mRNA, complete cds	O22900	188	9e-54	WRK23_ARATH Probable WRKY transcription factor 23 OS=Arabidopsis thaliana GN=WRKY23 PE=2 SV=1	--	--	--	--	--	K13424	6e-27	117	sbi:SORBI_09g023270	WRKY transcription factor 33
CL396.Contig3_All	1.1882	2.1692	1.1354	0.7326	0.25	0.1504	0.2036	0.1023	1.7888	1.1463	456.1	1e-156	hypothetical protein LR48_Vigan02g146800 [Vigna angularis] >gi|965608774|dbj|BAT95265.1| hypothetical protein VIGAN_08195600 [Vigna angularis var. angularis]	gi|351728065|ref|NM_001250509.1|	448	1e-122	Glycine max WRKY54 (LOC732591), mRNA >gi|83630942|gb|DQ322698.1| Glycine max WRKY54 mRNA, complete cds	O22900	258	3e-81	WRK23_ARATH Probable WRKY transcription factor 23 OS=Arabidopsis thaliana GN=WRKY23 PE=2 SV=1	--	--	--	--	--	K13424	4e-28	119	zma:100281160	WRKY transcription factor 33
CL396.Contig4_All	4.4	3.3508	6.288	6.889	1.7391	0.9176	1.1645	0.9362	6.9007	4.142	454.5	2e-155	hypothetical protein LR48_Vigan02g146800 [Vigna angularis] >gi|965608774|dbj|BAT95265.1| hypothetical protein VIGAN_08195600 [Vigna angularis var. angularis]	gi|351727594|ref|NM_001250493.1|	454	1e-124	Glycine max WRKY86 (LOC732590), mRNA >gi|83630940|gb|DQ322697.1| Glycine max WRKY51 mRNA, complete cds	O22900	256	4e-80	WRK23_ARATH Probable WRKY transcription factor 23 OS=Arabidopsis thaliana GN=WRKY23 PE=2 SV=1	--	--	--	--	--	K13424	5e-28	119	zma:100281160	WRKY transcription factor 33
CL396.Contig7_All	2.0401	1.4794	2.0014	2.907	1.0911	0.5048	0.3844	0.1717	2.2523	1.418	466.8	2e-159	hypothetical protein LR48_Vigan02g146800 [Vigna angularis] >gi|965608774|dbj|BAT95265.1| hypothetical protein VIGAN_08195600 [Vigna angularis var. angularis]	gi|351728065|ref|NM_001250509.1|	448	1e-122	Glycine max WRKY54 (LOC732591), mRNA >gi|83630942|gb|DQ322698.1| Glycine max WRKY54 mRNA, complete cds	O22900	256	1e-79	WRK23_ARATH Probable WRKY transcription factor 23 OS=Arabidopsis thaliana GN=WRKY23 PE=2 SV=1	--	--	--	--	--	K13424	6e-28	119	zma:100281160	WRKY transcription factor 33
CL396.Contig9_All	0	0	0	0	0.7411	1.1145	0	0.0541	0	0	403.7	1e-136	hypothetical protein LR48_Vigan02g146800 [Vigna angularis] >gi|965608774|dbj|BAT95265.1| hypothetical protein VIGAN_08195600 [Vigna angularis var. angularis]	gi|571559654|ref|XM_003554509.2|	272	1e-69	PREDICTED: Glycine max probable WRKY transcription factor 23-like (LOC100816452), mRNA	O22900	226	3e-69	WRK23_ARATH Probable WRKY transcription factor 23 OS=Arabidopsis thaliana GN=WRKY23 PE=2 SV=1	--	--	--	--	--	K13424	9e-23	102	zma:100281160	WRKY transcription factor 33
CL3970.Contig3_All	0.5784	1.1409	1.1292	2.8532	2.3713	2.6072	0.2336	0	0.1955	1.2	400.2	3e-138	hypothetical protein PHAVU_008G098300g [Phaseolus vulgaris] >gi|561013406|gb|ESW12267.1| hypothetical protein PHAVU_008G098300g [Phaseolus vulgaris]	gi|571466418|ref|XM_006583595.1|	317	2e-83	PREDICTED: Glycine max trihelix transcription factor GT-3b-like (LOC100778195), mRNA	O80450	301	3e-101	TGT3B_ARATH Trihelix transcription factor GT-3b OS=Arabidopsis thaliana GN=GT-3B PE=1 SV=1	--	--	--	--	--	--	--	--	--	--
CL3970.Contig4_All	0.5318	1.335	2.5467	4.1535	2.0787	4.3869	0.2227	0	0.4194	2.2444	400.2	6e-136	hypothetical protein PHAVU_008G098300g [Phaseolus vulgaris] >gi|561013406|gb|ESW12267.1| hypothetical protein PHAVU_008G098300g [Phaseolus vulgaris]	gi|571466418|ref|XM_006583595.1|	317	2e-83	PREDICTED: Glycine max trihelix transcription factor GT-3b-like (LOC100778195), mRNA	O80450	301	4e-99	TGT3B_ARATH Trihelix transcription factor GT-3b OS=Arabidopsis thaliana GN=GT-3B PE=1 SV=1	--	--	--	--	--	--	--	--	--	--
CL3970.Contig5_All	2.9775	1.7873	8.0285	9.0195	0.719	11.1122	0.5489	0.1839	1.8376	4.6276	431.8	5e-149	hypothetical protein PHAVU_008G098300g [Phaseolus vulgaris] >gi|561013406|gb|ESW12267.1| hypothetical protein PHAVU_008G098300g [Phaseolus vulgaris]	gi|571547551|ref|XM_003551512.2|	285	7e-74	PREDICTED: Glycine max trihelix transcription factor GT-3b-like (LOC100794230), mRNA	O80450	307	3e-102	TGT3B_ARATH Trihelix transcription factor GT-3b OS=Arabidopsis thaliana GN=GT-3B PE=1 SV=1	--	--	--	--	--	--	--	--	--	--
CL4030.Contig1_All	0.9932	1.6361	0.0652	0.6124	0.0575	0	1.813	2.3509	0.2203	0.3467	380.2	4e-128	MYB transcription factor MYB75 [Glycine max] >gi|110931672|gb|ABH02835.1| MYB transcription factor MYB75 [Glycine max]	gi|571542625|ref|XM_006601903.1|	396	1e-107	PREDICTED: Glycine max transcription factor DIVARICATA-like (LOC100783469), transcript variant X5, mRNA	Q8S9H7	253	1e-80	DIV_ANTMA Transcription factor DIVARICATA OS=Antirrhinum majus GN=DIVARICATA PE=2 SV=1	--	--	--	--	--	K12134	1e-06	52.8	aly:ARALYDRAFT_904154	circadian clock associated 1
CL4030.Contig5_All	4.4052	12.099	4.7939	6.9021	0.9595	0.8176	1.9532	1.7666	7.4178	10.0157	467.2	7e-161	hypothetical protein PHAVU_008G226600g [Phaseolus vulgaris] >gi|561014931|gb|ESW13792.1| hypothetical protein PHAVU_008G226600g [Phaseolus vulgaris]	gi|351723574|ref|NM_001248819.1|	482	1e-133	Glycine max MYB transcription factor MYB75 (MYB75), mRNA >gi|110931671|gb|DQ822894.1| Glycine max MYB transcription factor MYB75 (MYB75) mRNA, complete cds	Q8S9H7	268	3e-85	DIV_ANTMA Transcription factor DIVARICATA OS=Antirrhinum majus GN=DIVARICATA PE=2 SV=1	--	--	--	--	--	--	--	--	--	--
CL4068.Contig3_All	0.1883	0.1477	0.0495	0	0	0	0.9978	0.9136	0.0835	0.0526	74.7	7e-12	hypothetical protein GLYMA_03G136100 [Glycine max]	gi|571445492|ref|XM_006576755.1|	482	1e-132	PREDICTED: Glycine max AP2-like ethylene-responsive transcription factor At2g41710-like (LOC100814117), transcript variant X2, mRNA	Q8GWK2	245	3e-71	AP2L4_ARATH AP2-like ethylene-responsive transcription factor At2g41710 OS=Arabidopsis thaliana GN=At2g41710 PE=2 SV=2	--	--	--	--	--	K09285	2e-114	367	gmx:100814117	AP2-like factor, ANT lineage
CL4068.Contig5_All	1.5513	1.808	1.6306	0.4099	0.5129	0.2571	5.5334	5.036	2.4904	2.228	715.7	0	PREDICTED: AP2-like ethylene-responsive transcription factor At2g41710 isoform X1 [Cicer arietinum]	gi|502108709|ref|XM_004493424.1|	1009	0	PREDICTED: Cicer arietinum AP2-like ethylene-responsive transcription factor At2g41710-like (LOC101502947), transcript variant X1, mRNA	Q8GWK2	524	0	AP2L4_ARATH AP2-like ethylene-responsive transcription factor At2g41710 OS=Arabidopsis thaliana GN=At2g41710 PE=2 SV=2	--	--	--	--	--	K09285	0	720	gmx:100814117	AP2-like factor, ANT lineage
CL4068.Contig8_All	1.8261	0.2084	0.349	0.8189	0	0.1541	5.4746	4.4012	1.1782	1.1127	307.4	1e-103	hypothetical protein CISIN_1g018292mg [Citrus sinensis]	gi|502108713|ref|XM_004493425.1|	412	1e-112	PREDICTED: Cicer arietinum AP2-like ethylene-responsive transcription factor At2g41710-like (LOC101502947), transcript variant X2, mRNA	Q8GWK2	288	2e-97	AP2L4_ARATH AP2-like ethylene-responsive transcription factor At2g41710 OS=Arabidopsis thaliana GN=At2g41710 PE=2 SV=2	--	--	--	--	--	K09285	3e-103	306	gmx:100814117	AP2-like factor, ANT lineage
CL4079.Contig3_All	0.0725	0.091	0	0	0	0	0.6149	1.4417	0	0	395.6	3e-135	Transcription factor TT2 [Glycine soja]	gi|571497550|ref|XM_003541253.2|	515	1e-143	PREDICTED: Glycine max transcription factor MYB12-like (LOC100781908), mRNA	Q9FJA2	206	9e-64	TT2_ARATH Transcription factor TT2 OS=Arabidopsis thaliana GN=TT2 PE=1 SV=1	ECU11g1690	99.4	1e-23	COG5147	Myb superfamily proteins, including transcription factors and mRNA splicing factors	K09422	6e-95	288	vvi:100244605	myb proto-oncogene protein, plant
CL4079.Contig4_All	0.6737	0	0	0.0831	0	0	2.9836	2.4879	0.2391	0.301	339	1e-112	Transcription factor TT2 [Glycine soja]	gi|571497550|ref|XM_003541253.2|	208	1e-50	PREDICTED: Glycine max transcription factor MYB12-like (LOC100781908), mRNA	Q9FJA2	167	1e-48	TT2_ARATH Transcription factor TT2 OS=Arabidopsis thaliana GN=TT2 PE=1 SV=1	ECU11g1690	68.9	8e-13	COG5147	Myb superfamily proteins, including transcription factors and mRNA splicing factors	K09422	4e-72	231	vvi:100244605	myb proto-oncogene protein, plant
CL4086.Contig5_All	0	0.8839	0.839	1.0421	0	0.0436	0.0442	0	0.3332	1.3112	169.5	1e-94	Putative WRKY transcription factor 30 [Glycine soja]	gi|571460180|ref|XM_003526644.2|	133	9e-28	PREDICTED: Glycine max probable WRKY transcription factor 53-like (LOC100812027), mRNA	Q8H0Y8	96.3	2e-37	WRK41_ARATH Probable WRKY transcription factor 41 OS=Arabidopsis thaliana GN=WRKY41 PE=2 SV=2	--	--	--	--	--	K13425	2e-10	44.3	aly:ARALYDRAFT_490447	WRKY transcription factor 22
CL4086.Contig7_All	0.5361	11.1616	7.3256	8.8661	0.146	0.2048	0	0	10.1834	28.7804	444.1	4e-146	Putative WRKY transcription factor 30 [Glycine soja]	gi|571452057|ref|XM_003523340.2|	218	3e-53	PREDICTED: Glycine max probable WRKY transcription factor 53-like (LOC100776906), mRNA	Q8H0Y8	192	2e-54	WRK41_ARATH Probable WRKY transcription factor 41 OS=Arabidopsis thaliana GN=WRKY41 PE=2 SV=2	--	--	--	--	--	K13426	1e-16	83.6	rcu:RCOM_1689100	WRKY transcription factor 29
CL4086.Contig8_All	0.1571	1.8539	0.958	1.6664	0	0.0875	0.0296	0.0595	5.6877	8.4959	428.7	4e-140	Putative WRKY transcription factor 30 [Glycine soja]	gi|571452057|ref|XM_003523340.2|	153	1e-33	PREDICTED: Glycine max probable WRKY transcription factor 53-like (LOC100776906), mRNA	Q8H0Y8	177	4e-49	WRK41_ARATH Probable WRKY transcription factor 41 OS=Arabidopsis thaliana GN=WRKY41 PE=2 SV=2	--	--	--	--	--	K13426	2e-11	68.2	rcu:RCOM_1689100	WRKY transcription factor 29
CL4129.Contig3_All	1.0048	2.5224	4.3758	9.1163	0.3986	2.6642	1.0144	1.1553	1.0188	1.2027	329.3	2e-109	Myb-related protein Myb4 [Glycine soja]	gi|571557902|ref|XM_003553448.2|	303	3e-79	PREDICTED: Glycine max myb-related protein Myb4-like (LOC100802214), mRNA	Q7XBH4	233	2e-74	MYB4_ORYSJ Myb-related protein Myb4 OS=Oryza sativa subsp. japonica GN=MYB4 PE=2 SV=2	ECU11g1690	110	1e-27	COG5147	Myb superfamily proteins, including transcription factors and mRNA splicing factors	K09422	6e-111	329	gmx:100775603	myb proto-oncogene protein, plant
CL4147.Contig2_All	0.2843	0.0669	0.1121	0.263	2.6156	1.4347	0.1005	0.0505	0.1261	0.0397	95.1	5e-19	myb transcription factor [Medicago truncatula] >gi|657405203|gb|KEH43720.1| myb transcription factor [Medicago truncatula]	gi|571567688|ref|XM_003556056.2|	194	8e-46	PREDICTED: Glycine max remorin-like (LOC100791464), mRNA	P93788	150	7e-41	REMO_SOLTU Remorin OS=Solanum tuberosum PE=1 SV=1	--	--	--	--	--	K09422	5e-34	87.8	vvi:100241951	myb proto-oncogene protein, plant
CL4151.Contig1_All	3.8856	7.3615	8.7467	10.2159	0.7126	0.5443	2.5558	2.742	5.2033	12.4894	579.7	0	Putative WRKY transcription factor 21 [Glycine soja] >gi|947123109|gb|KRH71315.1| hypothetical protein GLYMA_02G141000 [Glycine max] >gi|947123110|gb|KRH71316.1| hypothetical protein GLYMA_02G141000 [Glycine max] >gi|947123111|gb|KRH71317.1| hypothetical protein GLYMA_02G141000 [Glycine max] >gi|947123112|gb|KRH71318.1| hypothetical protein GLYMA_02G141000 [Glycine max] >gi|947123113|gb|KRH71319.…	gi|210145463|dbj|AK244154.1|	579	1e-162	Glycine max cDNA, clone: GMFL01-02-D20	O04336	384	3e-126	WRK21_ARATH Probable WRKY transcription factor 21 OS=Arabidopsis thaliana GN=WRKY21 PE=2 SV=1	--	--	--	--	--	K13425	3e-27	114	pop:POPTR_755334	WRKY transcription factor 22
CL415.Contig3_All	12.2139	22.046	24.6988	36.0038	12.6523	19.3221	7.0692	9.5271	45.4067	38.138	541.6	0	PREDICTED: uncharacterized protein LOC106762661 [Vigna radiata var. radiata]	gi|571496022|ref|XM_006593426.1|	632	1e-178	PREDICTED: Glycine max MYB transcription factor MYB62 (MYB62), transcript variant X1, mRNA	Q2V9B0	150	3e-41	MY1R1_SOLTU Transcription factor MYB1R1 OS=Solanum tuberosum PE=2 SV=1	--	--	--	--	--	--	--	--	--	--
CL415.Contig4_All	6.7509	16.4015	16.4332	23.2705	4.5682	9.1955	1.7111	2.3176	27.8327	29.151	190.3	9e-52	Transcription factor [Morus notabilis] >gi|587885720|gb|EXB74577.1| Transcription factor [Morus notabilis]	gi|571496022|ref|XM_006593426.1|	387	1e-104	PREDICTED: Glycine max MYB transcription factor MYB62 (MYB62), transcript variant X1, mRNA	Q2V9B0	150	2e-40	MY1R1_SOLTU Transcription factor MYB1R1 OS=Solanum tuberosum PE=2 SV=1	--	--	--	--	--	--	--	--	--	--
CL4183.Contig10_All	3.5057	0.2411	2.3221	0.2369	18.7602	11.7652	0.181	0.1364	5.5103	3.1115	773.5	0	PREDICTED: transcription factor HBP-1b(c38)-like isoform X2 [Glycine max] >gi|947118780|gb|KRH67029.1| hypothetical protein GLYMA_03G142400 [Glycine max]	gi|571557244|ref|XM_003554148.2|	1128	0	PREDICTED: Glycine max transcription factor HBP-1b(c1)-like (LOC100799713), transcript variant X1, mRNA	P23923	342	7e-113	HBP1B_WHEAT Transcription factor HBP-1b(c38) OS=Triticum aestivum PE=2 SV=1	--	--	--	--	--	K14431	0	773	gmx:100815176	transcription factor TGA
CL4183.Contig11_All	0.1064	0.2671	1.4915	0	4.0719	3.1602	0	0	1.3008	0.2774	125.6	7e-32	hypothetical protein CISIN_1g042273mg [Citrus sinensis]	gi|571557244|ref|XM_003554148.2|	180	6e-42	PREDICTED: Glycine max transcription factor HBP-1b(c1)-like (LOC100799713), transcript variant X1, mRNA	Q39163	90.5	2e-19	TGA5_ARATH Transcription factor TGA5 OS=Arabidopsis thaliana GN=TGA5 PE=1 SV=2	--	--	--	--	--	K14431	9e-31	128	gmx:100815176	transcription factor TGA
CL4183.Contig12_All	0	0	0.2968	0	1.0456	0.8516	0	0	0.4175	0.1971	231.1	0	PREDICTED: transcription factor HBP-1b(c38)-like [Vigna radiata var. radiata]	gi|571557244|ref|XM_003554148.2|	624	1e-175	PREDICTED: Glycine max transcription factor HBP-1b(c1)-like (LOC100799713), transcript variant X1, mRNA	P23923	289	3e-90	HBP1B_WHEAT Transcription factor HBP-1b(c38) OS=Triticum aestivum PE=2 SV=1	--	--	--	--	--	K14431	0	452	gmx:100815176	transcription factor TGA
CL4183.Contig1_All	0.0438	0	1.3801	0	11.2223	10.0722	0	0	4.6075	0.7334	203.8	9e-56	hypothetical protein PHAVU_001G140100g [Phaseolus vulgaris] >gi|561035759|gb|ESW34289.1| hypothetical protein PHAVU_001G140100g [Phaseolus vulgaris]	gi|571445590|ref|XM_003521147.2|	309	8e-81	PREDICTED: Glycine max transcription factor HBP-1b(c1)-like (LOC100815176), mRNA	P23923	153	6e-45	HBP1B_WHEAT Transcription factor HBP-1b(c38) OS=Triticum aestivum PE=2 SV=1	--	--	--	--	--	K14431	2e-77	249	gmx:100815176	transcription factor TGA
CL4183.Contig2_All	0.1553	0.1559	2.4158	0.1149	9.6598	9.1072	0.0293	0	4.4819	2.0469	201.1	1e-53	PREDICTED: transcription factor HBP-1b(c38)-like [Vigna radiata var. radiata]	gi|571445590|ref|XM_003521147.2|	408	1e-110	PREDICTED: Glycine max transcription factor HBP-1b(c1)-like (LOC100815176), mRNA	P23923	201	1e-57	HBP1B_WHEAT Transcription factor HBP-1b(c38) OS=Triticum aestivum PE=2 SV=1	--	--	--	--	--	K14431	7e-154	465	gmx:100799713	transcription factor TGA
CL4183.Contig3_All	0.1452	0.1458	1.6486	0	9.437	7.7353	0	0.0275	3.3325	1.5573	201.1	1e-53	PREDICTED: transcription factor HBP-1b(c38)-like [Vigna radiata var. radiata]	gi|571445590|ref|XM_003521147.2|	355	2e-94	PREDICTED: Glycine max transcription factor HBP-1b(c1)-like (LOC100815176), mRNA	P23923	156	2e-46	HBP1B_WHEAT Transcription factor HBP-1b(c38) OS=Triticum aestivum PE=2 SV=1	--	--	--	--	--	K14431	5e-124	242	gmx:100815176	transcription factor TGA
CL4183.Contig4_All	0.1145	0.2874	0.2407	0	1.2009	1.0623	0	0	1.1284	0.682	231.1	0	PREDICTED: transcription factor HBP-1b(c38)-like [Vigna radiata var. radiata]	gi|571557244|ref|XM_003554148.2|	632	1e-178	PREDICTED: Glycine max transcription factor HBP-1b(c1)-like (LOC100799713), transcript variant X1, mRNA	P23923	289	8e-91	HBP1B_WHEAT Transcription factor HBP-1b(c38) OS=Triticum aestivum PE=2 SV=1	--	--	--	--	--	K14431	0	452	gmx:100815176	transcription factor TGA
CL4183.Contig5_All	0.1116	0.0934	0.43	0.1376	3.477	2.6228	0	0	1.3197	0.4985	673.3	0	PREDICTED: transcription factor HBP-1b(c38)-like [Vigna radiata var. radiata]	gi|571557244|ref|XM_003554148.2|	678	0	PREDICTED: Glycine max transcription factor HBP-1b(c1)-like (LOC100799713), transcript variant X1, mRNA	P23923	335	3e-108	HBP1B_WHEAT Transcription factor HBP-1b(c38) OS=Triticum aestivum PE=2 SV=1	--	--	--	--	--	K14431	0	672	gmx:100815176	transcription factor TGA
CL4183.Contig6_All	0	0	0.2485	0	0.9299	0.4935	0	0	0.1398	0.198	209.9	1e-60	PREDICTED: transcription factor TGA2-like isoform X3 [Glycine max]	gi|571557244|ref|XM_003554148.2|	281	1e-72	PREDICTED: Glycine max transcription factor HBP-1b(c1)-like (LOC100799713), transcript variant X1, mRNA	Q41558	147	9e-39	HBP1C_WHEAT Transcription factor HBP-1b(c1) (Fragment) OS=Triticum aestivum PE=1 SV=2	--	--	--	--	--	K14431	4e-61	209	gmx:100815176	transcription factor TGA
CL4183.Contig7_All	0	0	0.3029	0	0.8384	1.3754	0	0	0.5844	0.184	231.1	0	PREDICTED: transcription factor HBP-1b(c38)-like [Vigna radiata var. radiata]	gi|571557244|ref|XM_003554148.2|	579	1e-162	PREDICTED: Glycine max transcription factor HBP-1b(c1)-like (LOC100799713), transcript variant X1, mRNA	P23923	290	8e-92	HBP1B_WHEAT Transcription factor HBP-1b(c38) OS=Triticum aestivum PE=2 SV=1	--	--	--	--	--	K14431	0	454	gmx:100815176	transcription factor TGA
CL4183.Contig8_All	0	0	1.052	0	2.8505	2.286	0	0	0.7285	0.172	405.6	3e-138	PREDICTED: transcription factor TGA2-like isoform X3 [Glycine max]	gi|571557244|ref|XM_003554148.2|	543	1e-151	PREDICTED: Glycine max transcription factor HBP-1b(c1)-like (LOC100799713), transcript variant X1, mRNA	O24160	263	1e-83	TGA21_TOBAC TGACG-sequence-specific DNA-binding protein TGA-2.1 OS=Nicotiana tabacum GN=TGA21 PE=1 SV=1	--	--	--	--	--	K14431	2e-138	405	gmx:100815176	transcription factor TGA
CL4183.Contig9_All	0.2157	0.1015	0.9354	0	4.568	2.8026	0	0	1.244	0.241	85.1	8e-15	PREDICTED: transcription factor HBP-1b(c38)-like [Vigna radiata var. radiata]	gi|571445590|ref|XM_003521147.2|	585	1e-163	PREDICTED: Glycine max transcription factor HBP-1b(c1)-like (LOC100815176), mRNA	P23923	279	4e-85	HBP1B_WHEAT Transcription factor HBP-1b(c38) OS=Triticum aestivum PE=2 SV=1	--	--	--	--	--	K14431	0	591	gmx:100815176	transcription factor TGA
CL4287.Contig3_All	5.7835	3.5805	2.3824	3.3732	0.217	0.544	16.2374	18.3524	3.0508	3.9288	994.2	0	hypothetical protein PHAVU_008G286000g [Phaseolus vulgaris] >gi|561015635|gb|ESW14496.1| hypothetical protein PHAVU_008G286000g [Phaseolus vulgaris]	gi|292788041|dbj|AK339001.1|	1635	0	Lotus japonicus cDNA, clone: LjFL3-032-DB03, HTC	Q9LDL7	691	0	PAT1_ARATH Scarecrow-like transcription factor PAT1 OS=Arabidopsis thaliana GN=PAT1 PE=2 SV=1	--	--	--	--	--	K14494	6e-69	240	pop:POPTR_645273	DELLA protein
CL4345.Contig1_All	5.2383	6.5747	15.6641	9.4665	3.0098	3.2686	14.5513	11.5445	5.8758	4.2374	235.7	3e-75	hypothetical protein LR48_Vigan02g160300 [Vigna angularis] >gi|965608642|dbj|BAT95133.1| hypothetical protein VIGAN_08180000 [Vigna angularis var. angularis]	gi|571565689|ref|XM_003555750.2|	167	3e-38	PREDICTED: Glycine max transcription factor bHLH149-like (LOC100807196), mRNA	O80482	154	2e-45	BH149_ARATH Transcription factor bHLH149 OS=Arabidopsis thaliana GN=BHLH149 PE=1 SV=1	--	--	--	--	--	--	--	--	--	--
CL4405.Contig1_All	0.7894	1.2195	0.8298	0.2995	3.8225	3.0993	0.8582	0.69	1.6521	1.0854	485.3	5e-170	PREDICTED: nuclear transcription factor Y subunit C-9 [Vigna radiata var. radiata] >gi|951037371|ref|XP_014516893.1| PREDICTED: nuclear transcription factor Y subunit C-9 [Vigna radiata var. radiata]	gi|571560201|ref|XM_006604765.1|	753	0	PREDICTED: Glycine max uncharacterized LOC100527803 (LOC100527803), transcript variant X2, mRNA	Q8L4B2	289	1e-95	NFYC9_ARATH Nuclear transcription factor Y subunit C-9 OS=Arabidopsis thaliana GN=NFYC9 PE=2 SV=1	YOR358w	132	5e-35	COG5208	CCAAT-binding factor, subunit C	K03506	5e-07	51.6	olu:OSTLU_19031	DNA polymerase epsilon subunit 4 [EC:2.7.7.7]
CL4405.Contig4_All	0.2145	0.0897	0.4509	0.1763	0.728	1.2606	0.0674	0	0	0	485.7	2e-171	PREDICTED: nuclear transcription factor Y subunit C-9 [Vigna radiata var. radiata] >gi|951037371|ref|XP_014516893.1| PREDICTED: nuclear transcription factor Y subunit C-9 [Vigna radiata var. radiata]	gi|571560201|ref|XM_006604765.1|	769	0	PREDICTED: Glycine max uncharacterized LOC100527803 (LOC100527803), transcript variant X2, mRNA	Q8L4B2	290	8e-97	NFYC9_ARATH Nuclear transcription factor Y subunit C-9 OS=Arabidopsis thaliana GN=NFYC9 PE=2 SV=1	YOR358w	132	1e-35	COG5208	CCAAT-binding factor, subunit C	K03506	4e-07	51.6	olu:OSTLU_19031	DNA polymerase epsilon subunit 4 [EC:2.7.7.7]
CL4449.Contig13_All	0	0.3054	0.1462	0.3858	0	0.0323	0	0	0.329	0.2719	54.7	7e-06	JHL05D22.6 [Jatropha curcas]	gi|571444013|ref|XM_003521389.2|	355	2e-94	PREDICTED: Glycine max MADS-box transcription factor 6-like (LOC100810549), mRNA	Q6EU39	176	9e-50	MADS6_ORYSJ MADS-box transcription factor 6 OS=Oryza sativa subsp. japonica GN=MADS6 PE=1 SV=1	YPL089c	72.8	2e-12	COG5068	Regulator of arginine metabolism and related MADS box-containing transcription factors	K09264	3e-57	197	rcu:RCOM_1612950	MADS-box transcription factor, plant
CL4449.Contig1_All	0.4184	0.6302	0.7917	1.1351	0.0775	0.6989	0	0	0.4949	0.4674	414.5	1e-144	hypothetical protein PHAVU_010G087900g [Phaseolus vulgaris] >gi|561007978|gb|ESW06927.1| hypothetical protein PHAVU_010G087900g [Phaseolus vulgaris]	gi|571465439|ref|XM_003528846.2|	603	1e-169	PREDICTED: Glycine max MADS-box transcription factor 6-like (LOC100820061), mRNA	P29386	318	2e-108	AGL6_ARATH Agamous-like MADS-box protein AGL6 OS=Arabidopsis thaliana GN=AGL6 PE=1 SV=2	YPL089c	72.8	3e-13	COG5068	Regulator of arginine metabolism and related MADS box-containing transcription factors	K09264	4e-140	399	vvi:100232868	MADS-box transcription factor, plant
CL4449.Contig4_All	0.0929	0.8159	0.8785	1.4886	0.8596	1.1202	0	0	0.3295	0.4149	379.8	1e-131	hypothetical protein PHAVU_010G087900g [Phaseolus vulgaris] >gi|561007978|gb|ESW06927.1| hypothetical protein PHAVU_010G087900g [Phaseolus vulgaris]	gi|571444013|ref|XM_003521389.2|	426	1e-116	PREDICTED: Glycine max MADS-box transcription factor 6-like (LOC100810549), mRNA	P29386	287	5e-97	AGL6_ARATH Agamous-like MADS-box protein AGL6 OS=Arabidopsis thaliana GN=AGL6 PE=1 SV=2	YPL089c	72.8	2e-13	COG5068	Regulator of arginine metabolism and related MADS box-containing transcription factors	K09264	3e-125	359	vvi:100232868	MADS-box transcription factor, plant
CL4543.Contig1_All	0.556	0	0	0	0	0	4.3877	4.8699	0	0.0776	379	5e-128	PREDICTED: transcription factor bHLH83-like [Vigna radiata var. radiata]	gi|571440210|ref|XM_003520166.2|	242	9e-61	PREDICTED: Glycine max transcription factor bHLH7-like (LOC100788949), transcript variant X1, mRNA	Q8S3D5	91.3	3e-20	BH069_ARATH Transcription factor bHLH69 OS=Arabidopsis thaliana GN=BHLH69 PE=2 SV=2	--	--	--	--	--	K12126	1e-07	55.1	aly:ARALYDRAFT_471048	phytochrome-interacting factor 3
CL4543.Contig2_All	0.3178	0.0798	0	0.2352	0	0	3.3541	4.0327	0.1504	0.213	103.6	5e-99	PREDICTED: transcription factor bHLH83-like [Vigna radiata var. radiata]	gi|502115792|ref|XM_004495237.1|	157	5e-35	PREDICTED: Cicer arietinum transcription factor bHLH83-like (LOC101507064), mRNA	O22768	67.8	3e-12	UNE12_ARATH Transcription factor UNE12 OS=Arabidopsis thaliana GN=UNE12 PE=2 SV=2	--	--	--	--	--	K12126	6e-06	50.1	ath:AT1G09530	phytochrome-interacting factor 3
CL4553.Contig1_All	2.7068	3.7371	4.5168	3.3379	3.0695	2.3235	1.1158	0.9611	4.2424	4.8758	853.2	0	PREDICTED: bZIP transcription factor 17-like [Cicer arietinum]	gi|292782844|dbj|AK338210.1|	389	1e-104	Lotus japonicus cDNA, clone: LjFL2-014-CC04, HTC	O22208	571	0	BZP17_ARATH bZIP transcription factor 17 OS=Arabidopsis thaliana GN=BZIP17 PE=1 SV=2	--	--	--	--	--	--	--	--	--	--
CL4553.Contig3_All	13.144	14.7463	21.5734	15.8915	11.3517	12.027	6.469	5.8403	24.0601	21.5734	849.7	0	PREDICTED: bZIP transcription factor 17-like [Cicer arietinum]	gi|292782844|dbj|AK338210.1|	389	1e-104	Lotus japonicus cDNA, clone: LjFL2-014-CC04, HTC	O22208	568	0	BZP17_ARATH bZIP transcription factor 17 OS=Arabidopsis thaliana GN=BZIP17 PE=1 SV=2	--	--	--	--	--	--	--	--	--	--
CL4553.Contig5_All	2.681	11.3768	4.7303	4.6441	0.5909	1.392	0.6917	0.544	9.9669	11.7656	209.9	1e-59	transcription factor bZIP37 [Glycine max]	gi|292782844|dbj|AK338210.1|	212	2e-51	Lotus japonicus cDNA, clone: LjFL2-014-CC04, HTC	O22208	162	5e-41	BZP17_ARATH bZIP transcription factor 17 OS=Arabidopsis thaliana GN=BZIP17 PE=1 SV=2	--	--	--	--	--	--	--	--	--	--
CL4637.Contig2_All	2.5288	2.6198	3.0379	1.2375	0.353	0.6146	6.4673	6.9742	5.0567	2.4886	43.1	3e-84	hypothetical protein PRUPE_ppa009495mg [Prunus persica] >gi|462395935|gb|EMJ01734.1| hypothetical protein PRUPE_ppa009495mg [Prunus persica]	gi|571557893|ref|XM_003553444.2|	123	2e-24	PREDICTED: Glycine max ethylene-responsive transcription factor ERF095-like (LOC100800069), mRNA	Q8S2T1	122	2e-57	DDPS6_ARATH Dehydrodolichyl diphosphate synthase 6 OS=Arabidopsis thaliana GN=At2g17570 PE=2 SV=2	YBR002c	61.6	6e-22	COG0020	Undecaprenyl pyrophosphate synthase	K11778	2e-79	185	vvi:100251570	ditrans,polycis-polyprenyl diphosphate synthase [EC:2.5.1.87]
CL4647.Contig4_All	0.1982	0.0415	0	0	0	0	0.5292	0.7194	0.0782	0.0369	58.2	2e-06	PREDICTED: transcription factor EGL1-like [Glycine max] >gi|947099652|gb|KRH48144.1| hypothetical protein GLYMA_07G071000 [Glycine max]	gi|122976636|gb|EF194892.1|	412	1e-112	Lotus angustissimus TAN1 (TAN1) mRNA, complete cds	Q9FN69	372	4e-117	GL3_ARATH Transcription factor GLABRA 3 OS=Arabidopsis thaliana GN=GL3 PE=1 SV=1	--	--	--	--	--	K13422	7e-20	96.7	ppp:PHYPADRAFT_164647	transcription factor MYC2
CL4647.Contig5_All	0.0704	0	0	0	0	0	0.9623	0.6002	0	0.0787	57	5e-06	PREDICTED: transcription factor EGL1-like [Glycine max] >gi|947099652|gb|KRH48144.1| hypothetical protein GLYMA_07G071000 [Glycine max]	gi|122976636|gb|EF194892.1|	418	1e-113	Lotus angustissimus TAN1 (TAN1) mRNA, complete cds	Q9FN69	377	9e-120	GL3_ARATH Transcription factor GLABRA 3 OS=Arabidopsis thaliana GN=GL3 PE=1 SV=1	--	--	--	--	--	K13422	4e-22	96.7	ppp:PHYPADRAFT_164647	transcription factor MYC2
CL4667.Contig14_All	0.2438	0.6119	1.1957	1.2023	0.0752	0.3016	0	0	0	0.2723	68.6	1e-56	protein TIFY 11B-like [Glycine max] >gi|734313535|gb|KHN01432.1| Protein TIFY 11B [Glycine soja] >gi|918463847|gb|ALA09268.1| ZIM transcription factor, partial [Glycine max]	gi|402794641|ref|NM_001253054.2|	131	2e-27	Glycine max protein TIFY 11B-like (LOC100778559), mRNA	Q9S7M2	85.5	6e-19	TI10B_ARATH Protein TIFY 10B OS=Arabidopsis thaliana GN=TIFY10B PE=1 SV=1	--	--	--	--	--	K13464	2e-21	94	rcu:RCOM_0684970	jasmonate ZIM domain-containing protein
CL4696.Contig5_All	0.6729	0.9854	0.2947	0.7606	0	0.052	1.7436	1.1681	0.796	1.4408	480.3	7e-165	PREDICTED: transcription factor PIF7 isoform X3 [Vitis vinifera]	gi|571461421|ref|XM_006581928.1|	272	1e-69	PREDICTED: Glycine max transcription factor UNE10-like (LOC102667566), transcript variant X2, mRNA	Q8GZ38	196	3e-57	UNE10_ARATH Transcription factor UNE10 OS=Arabidopsis thaliana GN=UNE10 PE=2 SV=1	--	--	--	--	--	K12126	1e-25	111	ath:AT1G09530	phytochrome-interacting factor 3
CL4783.Contig1_All	3.5442	1.7407	1.2148	3.3253	0.214	0.5005	0	0.1459	1.6405	0.8607	497.7	2e-175	hypothetical protein LR48_Vigan03g201200 [Vigna angularis] >gi|965670400|dbj|BAT85007.1| hypothetical protein VIGAN_04249500 [Vigna angularis var. angularis]	gi|571556518|ref|XM_003554014.2|	555	1e-155	PREDICTED: Glycine max myb-related protein 306-like (LOC100817854), mRNA	P81392	270	2e-88	MYB06_ANTMA Myb-related protein 306 OS=Antirrhinum majus GN=MYB306 PE=2 SV=1	ECU11g1690	110	8e-28	COG5147	Myb superfamily proteins, including transcription factors and mRNA splicing factors	K09422	1e-153	437	pop:POPTR_663179	myb proto-oncogene protein, plant
CL4783.Contig2_All	0.4256	0.4579	0.5113	1.2747	4.5592	2.652	0.5729	0.5182	0.2158	0.2038	186.8	1e-52	hypothetical protein PHAVU_008G041500g [Phaseolus vulgaris] >gi|561012712|gb|ESW11573.1| hypothetical protein PHAVU_008G041500g [Phaseolus vulgaris]	gi|571496668|ref|XM_003543735.2|	315	9e-83	PREDICTED: Glycine max MYB transcription factor MYB53 (MYB53), mRNA	P81392	182	5e-53	MYB06_ANTMA Myb-related protein 306 OS=Antirrhinum majus GN=MYB306 PE=2 SV=1	ECU11g1690	68.6	1e-12	COG5147	Myb superfamily proteins, including transcription factors and mRNA splicing factors	K09422	5e-83	261	vvi:100257755	myb proto-oncogene protein, plant
CL4783.Contig4_All	1.1146	0.1447	0.8686	1.5167	1.103	1.712	0.0543	0.182	0.7729	0.2576	198.7	5e-54	PREDICTED: myb-related protein 306 [Vigna radiata var. radiata]	gi|571556518|ref|XM_003554014.2|	454	1e-124	PREDICTED: Glycine max myb-related protein 306-like (LOC100817854), mRNA	P81392	186	5e-52	MYB06_ANTMA Myb-related protein 306 OS=Antirrhinum majus GN=MYB306 PE=2 SV=1	ECU11g1690	75.9	1e-14	COG5147	Myb superfamily proteins, including transcription factors and mRNA splicing factors	K09422	3e-75	254	pop:POPTR_663179	myb proto-oncogene protein, plant
CL4783.Contig5_All	4.2214	1.1749	2.3537	3.9834	2.6844	4.9393	0.9511	0.9906	2.7138	1.5377	523.9	1e-170	PREDICTED: myb-related protein 306 [Vigna radiata var. radiata]	gi|571556518|ref|XM_003554014.2|	670	0	PREDICTED: Glycine max myb-related protein 306-like (LOC100817854), mRNA	P81392	268	2e-80	MYB06_ANTMA Myb-related protein 306 OS=Antirrhinum majus GN=MYB306 PE=2 SV=1	ECU11g1690	117	9e-29	COG5147	Myb superfamily proteins, including transcription factors and mRNA splicing factors	K09422	3e-141	439	pop:POPTR_663179	myb proto-oncogene protein, plant
CL4789.Contig4_All	1.2281	0.649	8.4249	6.6156	3.2311	2.5192	7.1255	7.9562	8.5633	8.9535	544.3	0	COL domain class transcription factor [Malus domestica]	gi|351725878|ref|NM_001248899.1|	363	4e-97	Glycine max CONSTANS-like 2a (COL2a), mRNA >gi|87044707|gb|DQ371243.1| Glycine max CONSTANS-like 2a (COL2a) mRNA, complete cds	Q96502	389	2e-133	COL2_ARATH Zinc finger protein CONSTANS-LIKE 2 OS=Arabidopsis thaliana GN=COL2 PE=1 SV=1	--	--	--	--	--	K12135	4e-124	367	aly:ARALYDRAFT_488429	zinc finger protein CONSTANS
CL4806.Contig2_All	11.0517	6.3363	22.3732	7.6554	0.1263	0.2532	1.3498	1.0335	14.6868	19.6616	318.2	1e-104	PREDICTED: ethylene-responsive transcription factor TINY-like [Vigna radiata var. radiata]	gi|134038601|gb|EF151462.1|	198	1e-47	Populus trichocarpa TINY-like protein 2 (TINYL2) gene, complete cds	Q9LYD3	222	5e-70	DREB3_ARATH Dehydration-responsive element-binding protein 3 OS=Arabidopsis thaliana GN=DREB3 PE=2 SV=1	--	--	--	--	--	K09286	3e-97	293	vvi:100252531	EREBP-like factor
CL4816.Contig1_All	6.9839	4.1569	2.4975	2.042	0	0.0668	5.0878	4.1585	2.4698	3.5388	327	4e-109	PREDICTED: transcription repressor MYB4 isoform X2 [Jatropha curcas]	gi|571467293|ref|XM_003528477.2|	408	1e-111	PREDICTED: Glycine max myb-related protein 308-like (LOC100814923), mRNA	Q9SZP1	232	1e-73	MYB4_ARATH Transcription repressor MYB4 OS=Arabidopsis thaliana GN=MYB4 PE=1 SV=1	ECU11g1690	98.6	2e-23	COG5147	Myb superfamily proteins, including transcription factors and mRNA splicing factors	K09422	3e-109	322	vvi:100233136	myb proto-oncogene protein, plant
CL4816.Contig2_All	0.6274	0.1969	0	0	0.0726	0	12.1917	16.5584	0.0928	0	287	3e-94	PREDICTED: transcription repressor MYB6-like [Populus euphratica]	gi|568884848|ref|XM_006494989.1|	335	7e-89	PREDICTED: Citrus sinensis myb-related protein 308-like (LOC102625526), mRNA	P81393	229	1e-73	MYB08_ANTMA Myb-related protein 308 OS=Antirrhinum majus GN=MYB308 PE=2 SV=1	ECU11g1690	105	5e-26	COG5147	Myb superfamily proteins, including transcription factors and mRNA splicing factors	K09422	1e-94	283	pop:POPTR_566512	myb proto-oncogene protein, plant
CL4816.Contig3_All	1.9193	1.752	0	0.3227	0.0808	0	38.634	41.1372	1.7543	1.9491	299.3	1e-99	PREDICTED: transcription repressor MYB4-like [Nelumbo nucifera]	gi|568884848|ref|XM_006494989.1|	357	2e-95	PREDICTED: Citrus sinensis myb-related protein 308-like (LOC102625526), mRNA	Q9S9K9	231	1e-74	MYB3_ARATH Transcription factor MYB3 OS=Arabidopsis thaliana GN=MYB3 PE=1 SV=1	ECU11g1690	102	4e-25	COG5147	Myb superfamily proteins, including transcription factors and mRNA splicing factors	K09422	1e-96	287	pop:POPTR_566512	myb proto-oncogene protein, plant
CL4816.Contig4_All	1.6527	1.0372	0.9819	1.0633	0	0.0333	3.6561	3.8102	0.5525	1.0034	148.7	4e-38	PREDICTED: transcription repressor MYB4 isoform X2 [Jatropha curcas]	gi|571467293|ref|XM_003528477.2|	307	4e-80	PREDICTED: Glycine max myb-related protein 308-like (LOC100814923), mRNA	Q9S9K9	152	2e-41	MYB3_ARATH Transcription factor MYB3 OS=Arabidopsis thaliana GN=MYB3 PE=1 SV=1	ECU11g1690	60.1	2e-09	COG5147	Myb superfamily proteins, including transcription factors and mRNA splicing factors	K09422	2e-50	178	vvi:100233136	myb proto-oncogene protein, plant
CL4816.Contig6_All	0.0836	0	0	0	0	0	3.9388	4.0373	0	0	122.9	7e-31	PREDICTED: transcription repressor MYB6-like [Populus euphratica]	gi|568884848|ref|XM_006494989.1|	131	2e-27	PREDICTED: Citrus sinensis myb-related protein 308-like (LOC102625526), mRNA	P81393	90.1	9e-21	MYB08_ANTMA Myb-related protein 308 OS=Antirrhinum majus GN=MYB308 PE=2 SV=1	ECU11g1690	49.3	3e-06	COG5147	Myb superfamily proteins, including transcription factors and mRNA splicing factors	K09422	1e-32	122	pop:POPTR_766132	myb proto-oncogene protein, plant
CL4816.Contig7_All	0	0	0	0	0	0	3.0824	4.8676	0	0	72	2e-14	PREDICTED: transcription factor WER-like [Malus domestica]	gi|597711408|gb|KJ126857.1|	117	1e-23	Malus hybrid cultivar MYB2 (MYB2) mRNA, complete cds	Q9LTF7	68.2	6e-15	MYB82_ARATH Transcription factor MYB82 OS=Arabidopsis thaliana GN=MYB82 PE=1 SV=1	ECU11g1690	51.6	3e-08	COG5147	Myb superfamily proteins, including transcription factors and mRNA splicing factors	K09422	1e-15	70.5	pop:POPTR_775912	myb proto-oncogene protein, plant
CL4830.Contig3_All	0.3346	1.3799	1.0551	1.2378	1.239	0.9315	0.1351	0.1358	0.622	0.534	282	1e-89	PREDICTED: transcription factor bHLH104-like isoform X2 [Glycine max]	gi|571481079|ref|XM_003535763.2|	432	1e-118	PREDICTED: Glycine max transcription factor bHLH104-like (LOC100789655), mRNA	Q8L467	218	4e-66	BH104_ARATH Transcription factor bHLH104 OS=Arabidopsis thaliana GN=BHLH104 PE=2 SV=1	--	--	--	--	--	K13422	6e-06	50.8	pop:POPTR_836925	transcription factor MYC2
CL4830.Contig4_All	0.7836	1.967	3.8343	3.1321	1.2757	1.6298	0.7892	0.8443	2.5889	3.3504	144.4	8e-37	hypothetical protein PHAVU_007G272600g [Phaseolus vulgaris] >gi|561019030|gb|ESW17834.1| hypothetical protein PHAVU_007G272600g [Phaseolus vulgaris]	gi|571481079|ref|XM_003535763.2|	206	1e-49	PREDICTED: Glycine max transcription factor bHLH104-like (LOC100789655), mRNA	Q8L467	109	6e-26	BH104_ARATH Transcription factor bHLH104 OS=Arabidopsis thaliana GN=BHLH104 PE=2 SV=1	--	--	--	--	--	--	--	--	--	--
CL4870.Contig1_All	4.6894	3.3975	7.2536	9.1677	5.5762	4.8824	10.0941	11.5517	14.3863	14.9915	580.5	0	Myb-like protein G [Glycine soja]	gi|571530351|ref|XM_003548266.2|	460	1e-126	PREDICTED: Glycine max MYB transcription factor MYB131 (MYB131), mRNA	B3H5A8	235	5e-70	RVE7_ARATH Protein REVEILLE 7 OS=Arabidopsis thaliana GN=RVE7 PE=2 SV=1	--	--	--	--	--	K12133	2e-35	144	ath:AT1G01060	LATE ELONGATED HYPOCOTYL
CL4870.Contig6_All	1.6949	1.6398	3.7859	4.1366	3.0726	2.1299	6.2215	6.6867	7.8942	8.244	154.8	6e-38	Myb-like protein G [Glycine soja]	gi|571530351|ref|XM_003548266.2|	248	3e-62	PREDICTED: Glycine max MYB transcription factor MYB131 (MYB131), mRNA	B3H5A8	126	4e-31	RVE7_ARATH Protein REVEILLE 7 OS=Arabidopsis thaliana GN=RVE7 PE=2 SV=1	--	--	--	--	--	K12133	2e-25	113	ath:AT1G01060	LATE ELONGATED HYPOCOTYL
CL4870.Contig8_All	0.2892	0.726	1.4766	3.2608	4.7426	6.2113	4.5547	5.9464	8.1129	5.9078	102.1	1e-20	Myb-like protein G [Glycine soja]	gi|571530351|ref|XM_003548266.2|	377	1e-101	PREDICTED: Glycine max MYB transcription factor MYB131 (MYB131), mRNA	B3H5A8	151	6e-53	RVE7_ARATH Protein REVEILLE 7 OS=Arabidopsis thaliana GN=RVE7 PE=2 SV=1	--	--	--	--	--	K12133	5e-30	79.3	ath:AT1G01060	LATE ELONGATED HYPOCOTYL
CL4884.Contig2_All	13.4985	64.2202	25.0127	14.8691	0.7902	0.1485	4.6751	3.4352	47.9646	50.0646	554.3	0	PREDICTED: AP2/ERF and B3 domain-containing transcription repressor TEM1 [Glycine max] >gi|947122397|gb|KRH70603.1| hypothetical protein GLYMA_02G099500 [Glycine max]	gi|571439508|ref|XM_003518634.2|	224	3e-55	PREDICTED: Glycine max AP2/ERF and B3 domain-containing transcription repressor TEM1-like (LOC100801107), mRNA	Q9ZWM9	404	5e-138	RAV1_ARATH AP2/ERF and B3 domain-containing transcription factor RAV1 OS=Arabidopsis thaliana GN=RAV1 PE=1 SV=1	--	--	--	--	--	K09287	5e-174	498	rcu:RCOM_0705620	RAV-like factor
CL4884.Contig3_All	10.1388	41.5839	19.8005	30.4707	0.5129	0.2057	1.305	0.8918	33.03	48.2125	520	0	PREDICTED: AP2/ERF and B3 domain-containing transcription factor RAV1-like [Cicer arietinum]	gi|571439508|ref|XM_003518634.2|	184	2e-43	PREDICTED: Glycine max AP2/ERF and B3 domain-containing transcription repressor TEM1-like (LOC100801107), mRNA	Q9C6M5	429	9e-148	RAVL1_ARATH AP2/ERF and B3 domain-containing transcription repressor TEM1 OS=Arabidopsis thaliana GN=TEM1 PE=1 SV=1	--	--	--	--	--	K09287	6e-176	501	vvi:100262843	RAV-like factor
CL4884.Contig4_All	19.7049	62.8239	43.8925	57.348	1.0611	0.3546	0.72	1.0337	76.6408	101.89	520.4	0	PREDICTED: AP2/ERF and B3 domain-containing transcription factor RAV1-like [Cicer arietinum]	gi|571439508|ref|XM_003518634.2|	184	2e-43	PREDICTED: Glycine max AP2/ERF and B3 domain-containing transcription repressor TEM1-like (LOC100801107), mRNA	Q9C6M5	431	3e-148	RAVL1_ARATH AP2/ERF and B3 domain-containing transcription repressor TEM1 OS=Arabidopsis thaliana GN=TEM1 PE=1 SV=1	--	--	--	--	--	K09287	1e-176	504	vvi:100262843	RAV-like factor
CL4915.Contig2_All	1.3734	0.7072	0.7033	0.2606	0	0	0.9954	1.1671	0.5415	0.4327	78.6	5e-15	hypothetical protein F383_15815 [Gossypium arboreum]	gi|21717507|dbj|AP004578.1|	159	2e-35	Lotus japonicus genomic DNA, chromosome 2, clone: LjT17H01, TM0541, complete sequence	A2RVQ5	57.4	8e-09	AGL16_ARATH Agamous-like MADS-box protein AGL16 OS=Arabidopsis thaliana GN=AGL16 PE=1 SV=1	--	--	--	--	--	K09264	2e-09	60.5	rcu:RCOM_0818130	MADS-box transcription factor, plant
CL4927.Contig3_All	3.4186	4.2908	0.2995	0.8197	0	0	2.5052	2.6075	0.337	1.5912	416.4	2e-144	PREDICTED: uncharacterized protein LOC100787178 isoform X1 [Glycine max] >gi|947122539|gb|KRH70745.1| hypothetical protein GLYMA_02G108500 [Glycine max]	gi|571439621|ref|XM_003520032.2|	505	1e-140	PREDICTED: Glycine max uncharacterized LOC100787178 (LOC100787178), mRNA	F4I274	248	1e-80	PHL8_ARATH Myb family transcription factor PHL8 OS=Arabidopsis thaliana GN=PHL8 PE=2 SV=1	--	--	--	--	--	K14491	3e-14	74.7	zma:541636	two-component response regulator ARR-B family
CL4933.Contig1_All	1.8375	2.2678	2.2051	2.247	1.0489	2.2593	0.5482	0.4494	2.3365	0.7355	144.1	6e-93	PREDICTED: MADS-box transcription factor 23-like isoform X3 [Glycine max]	gi|571511232|ref|XM_006596326.1|	363	2e-96	PREDICTED: Glycine max MADS-box transcription factor 27-like (LOC100812413), transcript variant X2, mRNA	Q6EP49	149	6e-68	MAD27_ORYSJ MADS-box transcription factor 27 OS=Oryza sativa subsp. japonica GN=MADS27 PE=2 SV=2	YPL089c	67.4	2e-10	COG5068	Regulator of arginine metabolism and related MADS box-containing transcription factors	K09264	3e-70	153	vvi:100244955	MADS-box transcription factor, plant
CL4933.Contig2_All	0	0	0	0	1.7314	1.215	0	0	0	0	144.1	5e-87	PREDICTED: MADS-box transcription factor 23-like isoform X5 [Glycine max]	gi|571511236|ref|XM_006596327.1|	319	4e-84	PREDICTED: Glycine max MADS-box transcription factor 27-like (LOC100812413), transcript variant X3, mRNA	Q6EP49	130	1e-60	MAD27_ORYSJ MADS-box transcription factor 27 OS=Oryza sativa subsp. japonica GN=MADS27 PE=2 SV=2	YPL089c	67.4	1e-11	COG5068	Regulator of arginine metabolism and related MADS box-containing transcription factors	K09264	8e-64	135	rcu:RCOM_0818130	MADS-box transcription factor, plant
CL4933.Contig6_All	0.2448	0.1024	0	0.1006	0.9821	1.2875	0	0	0	0.0912	382.5	8e-132	PREDICTED: MADS-box transcription factor 23-like isoform X4 [Glycine max] >gi|947067739|gb|KRH16882.1| hypothetical protein GLYMA_14G183800 [Glycine max] >gi|947067740|gb|KRH16883.1| hypothetical protein GLYMA_14G183800 [Glycine max]	gi|571441180|ref|XM_003518223.2|	583	1e-163	PREDICTED: Glycine max agamous-like MADS-box protein AGL16-like (LOC100778970), transcript variant X1, mRNA	Q6EP49	288	5e-97	MAD27_ORYSJ MADS-box transcription factor 27 OS=Oryza sativa subsp. japonica GN=MADS27 PE=2 SV=2	YPL089c	68.2	9e-12	COG5068	Regulator of arginine metabolism and related MADS box-containing transcription factors	K09264	4e-100	297	gmx:100808145	MADS-box transcription factor, plant
CL4975.Contig3_All	1.0902	0.6842	1.3369	1.0083	10.0918	6.07	0.7704	0.4301	0.4299	1.0149	351.7	8e-119	Fork head transcription factor 1 [Morus notabilis] >gi|587911251|gb|EXB99105.1| Fork head transcription factor 1 [Morus notabilis]	gi|470107707|ref|XM_004290136.1|	327	2e-86	PREDICTED: Fragaria vesca subsp. vesca uncharacterized LOC101311814, transcript variant 2 (LOC101311814), mRNA	Q945P0	275	1e-92	FHA1_TOBAC Transcriptional activator FHA1 OS=Nicotiana tabacum GN=FHA1 PE=1 SV=1	SPAC1142.08	74.7	5e-14	COG5025	Transcription factor of the Forkhead/HNF3 family	--	--	--	--	--
CL500.Contig1_All	36.2323	164.183	93.1587	56.9824	17.2291	27.8836	15.5574	14.5291	77.9875	125.66	431.4	1e-147	PREDICTED: U-box domain-containing protein 11 [Ricinus communis] >gi|223548050|gb|EEF49542.1| ubiquitin-protein ligase, putative [Ricinus communis]	gi|566163555|ref|XM_002303898.2|	75.8	1e-10	Populus trichocarpa armadillo/beta-catenin repeat family protein (POPTR_0003s19480g) mRNA, complete cds	Q8GUG9	134	2e-33	PUB11_ARATH U-box domain-containing protein 11 OS=Arabidopsis thaliana GN=PUB11 PE=2 SV=2	--	--	--	--	--	K14431	1e-119	365	aly:ARALYDRAFT_311885	transcription factor TGA
CL500.Contig2_All	2.2939	11.5165	3.1001	4.041	0.5056	0.4055	1.235	0.9308	8.3987	9.2737	367.9	1e-126	PREDICTED: U-box domain-containing protein 11 [Ricinus communis] >gi|223548050|gb|EEF49542.1| ubiquitin-protein ligase, putative [Ricinus communis]	gi|566163555|ref|XM_002303898.2|	75.8	8e-11	Populus trichocarpa armadillo/beta-catenin repeat family protein (POPTR_0003s19480g) mRNA, complete cds	O22193	122	3e-31	PUB4_ARATH U-box domain-containing protein 4 OS=Arabidopsis thaliana GN=PUB4 PE=1 SV=3	--	--	--	--	--	K14431	3e-100	306	aly:ARALYDRAFT_311885	transcription factor TGA
CL5044.Contig13_All	1.0134	23.7095	11.8881	40.0398	0.2627	0.1505	0.0764	0	0.048	6.3849	503.1	3e-171	Heat shock transcription factor A2 isoform 1 [Theobroma cacao] >gi|590574103|ref|XP_007012308.1| Heat shock transcription factor A2 isoform 1 [Theobroma cacao] >gi|508782669|gb|EOY29925.1| Heat shock transcription factor A2 isoform 1 [Theobroma cacao] >gi|508782671|gb|EOY29927.1| Heat shock transcription factor A2 isoform 1 [Theobroma cacao]	gi|571508723|ref|XR_417931.1|	268	3e-68	PREDICTED: Glycine max heat stress transcription factor A-2-like (LOC100778558), transcript variant X5, misc_RNA	P41152	379	2e-125	HSF30_SOLPE Heat shock factor protein HSF30 OS=Solanum peruvianum GN=HSF30 PE=2 SV=1	SPAC2E12.02.02	99.8	5e-21	COG5169	Heat shock transcription factor	--	--	--	--	--
CL5044.Contig3_All	0.2926	7.8947	3.2674	9.5602	0.0677	0.1018	0.0345	0.0693	0.0865	2.0017	500.4	4e-169	Heat shock transcription factor A2 isoform 1 [Theobroma cacao] >gi|590574103|ref|XP_007012308.1| Heat shock transcription factor A2 isoform 1 [Theobroma cacao] >gi|508782669|gb|EOY29925.1| Heat shock transcription factor A2 isoform 1 [Theobroma cacao] >gi|508782671|gb|EOY29927.1| Heat shock transcription factor A2 isoform 1 [Theobroma cacao]	gi|571508723|ref|XR_417931.1|	268	3e-68	PREDICTED: Glycine max heat stress transcription factor A-2-like (LOC100778558), transcript variant X5, misc_RNA	P41152	380	3e-125	HSF30_SOLPE Heat shock factor protein HSF30 OS=Solanum peruvianum GN=HSF30 PE=2 SV=1	SPAC2E12.02.02	99.8	6e-21	COG5169	Heat shock transcription factor	--	--	--	--	--
CL5097.Contig1_All	1.6135	7.5295	5.61	4.9487	4.4426	4.7607	0.078	0.0392	11.6474	12.2474	257.3	5e-79	PREDICTED: ethylene-responsive transcription factor 4 [Cicer arietinum]	gi|332640072|gb|CP002686.1|	163	1e-36	Arabidopsis thaliana chromosome 3, complete sequence	O80340	188	6e-55	ERF78_ARATH Ethylene-responsive transcription factor 4 OS=Arabidopsis thaliana GN=ERF4 PE=1 SV=1	--	--	--	--	--	K09286	1e-54	188	ath:AT3G15210	EREBP-like factor
CL5097.Contig2_All	0.1349	1.4114	1.2766	0.3328	0.6662	0.5844	0.0424	0.0426	1.7027	1.9597	258.5	5e-80	PREDICTED: ethylene-responsive transcription factor 4 [Cicer arietinum]	gi|332640072|gb|CP002686.1|	149	2e-32	Arabidopsis thaliana chromosome 3, complete sequence	O80340	192	1e-56	ERF78_ARATH Ethylene-responsive transcription factor 4 OS=Arabidopsis thaliana GN=ERF4 PE=1 SV=1	--	--	--	--	--	K09286	3e-56	192	ath:AT3G15210	EREBP-like factor
CL5097.Contig3_All	0.855	1.482	0.8132	0.8535	0.2638	0.2645	0.2685	0.3084	2.7452	1.9103	286.2	5e-90	PREDICTED: ethylene-responsive transcription factor 4 [Cicer arietinum]	gi|494319592|gb|KC556917.1|	147	7e-32	Hevea brasiliensis ethylene-responsive transcription factor 5 mRNA, complete cds	O80340	196	5e-58	ERF78_ARATH Ethylene-responsive transcription factor 4 OS=Arabidopsis thaliana GN=ERF4 PE=1 SV=1	--	--	--	--	--	K09286	1e-57	196	ath:AT3G15210	EREBP-like factor
CL5106.Contig1_All	0.0397	0.5483	2.7971	1.2734	0.1471	3.9805	0.0374	0.0752	0	0.0887	493.8	5e-166	AP2/ERF domain-containing transcription factor, putative [Theobroma cacao] >gi|508707486|gb|EOX99382.1| AP2/ERF domain-containing transcription factor, putative [Theobroma cacao]	gi|568877221|ref|XM_006491579.1|	228	2e-56	PREDICTED: Citrus sinensis ethylene-responsive transcription factor ERF053-like (LOC102617350), mRNA	Q9SKT1	233	6e-70	ERF53_ARATH Ethylene-responsive transcription factor ERF053 OS=Arabidopsis thaliana GN=ERF053 PE=2 SV=1	--	--	--	--	--	K09286	5e-67	224	ath:AT4G28140	EREBP-like factor
CL5106.Contig3_All	0.1774	0	1.0068	0.6562	0.3284	0.4609	0.0668	0.0336	0.1259	0.1585	619.8	0	AP2/ERF domain-containing transcription factor, putative [Theobroma cacao] >gi|508707486|gb|EOX99382.1| AP2/ERF domain-containing transcription factor, putative [Theobroma cacao]	gi|148372107|gb|EF155942.1|	216	1e-52	Populus trichocarpa RAP2-like protein (RAP2L1) gene, complete cds	Q9SKT1	248	4e-75	ERF53_ARATH Ethylene-responsive transcription factor ERF053 OS=Arabidopsis thaliana GN=ERF053 PE=2 SV=1	--	--	--	--	--	K09286	3e-63	216	ath:AT4G28140	EREBP-like factor
CL5106.Contig5_All	0.1878	0.6599	2.4078	1.6207	0.2433	3.3453	0.0708	0.0711	0.2221	0.4195	503.8	2e-169	AP2/ERF domain-containing transcription factor, putative [Theobroma cacao] >gi|508707486|gb|EOX99382.1| AP2/ERF domain-containing transcription factor, putative [Theobroma cacao]	gi|148372107|gb|EF155942.1|	214	4e-52	Populus trichocarpa RAP2-like protein (RAP2L1) gene, complete cds	Q9SKT1	234	3e-70	ERF53_ARATH Ethylene-responsive transcription factor ERF053 OS=Arabidopsis thaliana GN=ERF053 PE=2 SV=1	--	--	--	--	--	K09286	7e-65	219	ath:AT4G28140	EREBP-like factor
CL5106.Contig7_All	1.5233	5.9424	26.5708	19.1394	8.7273	42.7124	0.4655	0.3508	0.2435	0.8278	445.3	1e-147	AP2/ERF domain-containing transcription factor, putative [Theobroma cacao] >gi|508707486|gb|EOX99382.1| AP2/ERF domain-containing transcription factor, putative [Theobroma cacao]	gi|568877221|ref|XM_006491579.1|	254	4e-64	PREDICTED: Citrus sinensis ethylene-responsive transcription factor ERF053-like (LOC102617350), mRNA	Q9SKT1	253	8e-78	ERF53_ARATH Ethylene-responsive transcription factor ERF053 OS=Arabidopsis thaliana GN=ERF053 PE=2 SV=1	--	--	--	--	--	K09286	2e-69	230	ath:AT4G28140	EREBP-like factor
CL5147.Contig3_All	8.4832	12.6339	0.0665	0	0.4688	0.7637	0.5368	0.3597	3.8191	3.1824	508.8	1e-178	hypothetical protein PHAVU_003G214300g [Phaseolus vulgaris] >gi|561028936|gb|ESW27576.1| hypothetical protein PHAVU_003G214300g [Phaseolus vulgaris]	gi|571536249|ref|XM_006600748.1|	688	0	PREDICTED: Glycine max protein ODORANT1-like (LOC100786965), mRNA	Q50EX6	339	2e-114	ODO1_PETHY Protein ODORANT1 OS=Petunia hybrida GN=ODO1 PE=2 SV=1	ECU11g1690	105	1e-25	COG5147	Myb superfamily proteins, including transcription factors and mRNA splicing factors	K09422	1e-151	433	vvi:100259031	myb proto-oncogene protein, plant
CL5157.Contig2_All	1.8481	0.8376	0.4857	0.5697	0	0.0476	12.4792	11.9088	0.4251	0.2867	642.9	0	myb family transcription factor [Castanea mollissima]	gi|262410510|gb|GU076490.1|	672	0	Castanea mollissima myb family transcription factor mRNA, complete cds	O80931	506	3e-177	AS1_ARATH Transcription factor AS1 OS=Arabidopsis thaliana GN=AS1 PE=1 SV=1	ECU11g1690	87.4	5e-19	COG5147	Myb superfamily proteins, including transcription factors and mRNA splicing factors	K09422	0	634	vvi:100256209	myb proto-oncogene protein, plant
CL5157.Contig5_All	4.9406	2.1157	2.7494	1.2185	0.269	0.1079	13.9652	16.5105	2.6127	2.2726	228.8	3e-178	myb family transcription factor [Castanea mollissima]	gi|262410510|gb|GU076490.1|	658	0	Castanea mollissima myb family transcription factor mRNA, complete cds	O80931	296	3e-139	AS1_ARATH Transcription factor AS1 OS=Arabidopsis thaliana GN=AS1 PE=1 SV=1	ECU11g1690	85.5	2e-18	COG5147	Myb superfamily proteins, including transcription factors and mRNA splicing factors	K09422	4e-177	414	vvi:100256209	myb proto-oncogene protein, plant
CL5157.Contig6_All	1.4176	1.1203	0.6623	0.6474	0.1944	0.0487	6.1837	5.0707	1.18	0.9971	635.2	0	myb family transcription factor [Castanea mollissima]	gi|262410510|gb|GU076490.1|	624	1e-176	Castanea mollissima myb family transcription factor mRNA, complete cds	O80931	501	2e-175	AS1_ARATH Transcription factor AS1 OS=Arabidopsis thaliana GN=AS1 PE=1 SV=1	ECU11g1690	88.2	3e-19	COG5147	Myb superfamily proteins, including transcription factors and mRNA splicing factors	K09422	0	627	vvi:100256209	myb proto-oncogene protein, plant
CL5157.Contig7_All	1.8805	1.9669	1.208	2.3833	0.0967	0.2424	4.7741	3.0665	3.1513	0.8753	576.6	0	Myb-like HTH transcriptional regulator family protein isoform 1 [Theobroma cacao] >gi|590629538|ref|XP_007027018.1| Myb-like HTH transcriptional regulator family protein isoform 1 [Theobroma cacao] >gi|508715622|gb|EOY07519.1| Myb-like HTH transcriptional regulator family protein isoform 1 [Theobroma cacao] >gi|508715623|gb|EOY07520.1| Myb-like HTH transcriptional regulator family protein isoform…	gi|33187356|gb|AY180134.1|	1112	0	Acacia hindsii phantastica transcription factor gene, partial cds	O80931	468	3e-162	AS1_ARATH Transcription factor AS1 OS=Arabidopsis thaliana GN=AS1 PE=1 SV=1	ECU11g1690	86.3	1e-18	COG5147	Myb superfamily proteins, including transcription factors and mRNA splicing factors	K09422	0	572	vvi:100256209	myb proto-oncogene protein, plant
CL5159.Contig9_All	5.1912	3.2245	2.5891	2.3515	1.4465	1.0569	6.1639	6.144	3.8222	4.3492	1354	0	PREDICTED: lysine-specific demethylase REF6-like [Glycine max] >gi|947115393|gb|KRH63695.1| hypothetical protein GLYMA_04G191900 [Glycine max]	gi|571461068|ref|XM_006581828.1|	698	0	PREDICTED: Glycine max lysine-specific demethylase REF6-like (LOC100810437), mRNA	Q9STM3	332	4e-95	REF6_ARATH Lysine-specific demethylase REF6 OS=Arabidopsis thaliana GN=REF6 PE=1 SV=1	SPAC144.09c	68.6	2e-11	COG5048	FOG: Zn-finger	K09191	3e-11	67.4	ath:AT1G72050	general transcription factor IIIA
CL515.Contig1_All	3.6157	6.4292	3.8007	4.0871	2.8822	2.8893	1.3249	0.8559	10.8113	14.4734	86.7	2e-17	Putative WRKY transcription factor 11 [Glycine soja]	gi|571449630|ref|XM_003522620.2|	141	2e-30	PREDICTED: Glycine max WRKY50 protein (WRKY50), mRNA	Q9SJA8	135	2e-37	WRK17_ARATH Probable WRKY transcription factor 17 OS=Arabidopsis thaliana GN=WRKY17 PE=2 SV=2	--	--	--	--	--	K13425	6e-08	54.7	vvi:100256849	WRKY transcription factor 22
CL515.Contig2_All	5.0461	15.7459	15.1759	17.5441	2.66	6.1135	1.981	2.0572	12.6841	26.2275	488.4	5e-171	PREDICTED: probable WRKY transcription factor 17 [Cicer arietinum]	gi|571449630|ref|XM_003522620.2|	359	6e-96	PREDICTED: Glycine max WRKY50 protein (WRKY50), mRNA	Q9SJA8	384	2e-132	WRK17_ARATH Probable WRKY transcription factor 17 OS=Arabidopsis thaliana GN=WRKY17 PE=2 SV=2	--	--	--	--	--	K13425	1e-26	110	pop:POPTR_755334	WRKY transcription factor 22
CL515.Contig3_All	0.8652	5.7259	4.1339	4.5102	1.4562	1.3138	0.704	0.5958	4.0472	6.0627	193	7e-53	PREDICTED: probable WRKY transcription factor 17 [Cicer arietinum]	gi|571449630|ref|XM_003522620.2|	283	5e-73	PREDICTED: Glycine max WRKY50 protein (WRKY50), mRNA	Q9SJA8	224	1e-66	WRK17_ARATH Probable WRKY transcription factor 17 OS=Arabidopsis thaliana GN=WRKY17 PE=2 SV=2	--	--	--	--	--	K13425	3e-24	106	rcu:RCOM_1616660	WRKY transcription factor 22
CL515.Contig4_All	0.2136	2.6269	2.0653	2.0541	0.514	0.7531	0.0402	0.1213	2.3241	3.1968	111.7	3e-132	PREDICTED: probable WRKY transcription factor 17 [Cicer arietinum]	gi|571449630|ref|XM_003522620.2|	184	3e-43	PREDICTED: Glycine max WRKY50 protein (WRKY50), mRNA	Q9SJA8	302	2e-101	WRK17_ARATH Probable WRKY transcription factor 17 OS=Arabidopsis thaliana GN=WRKY17 PE=2 SV=2	--	--	--	--	--	K13425	9e-20	60.1	pop:POPTR_755334	WRKY transcription factor 22
CL515.Contig5_All	0.3293	0.7806	0.4999	0.9925	0.3048	0.2716	0	0.0346	2.5965	2.3295	87.8	9e-43	WRKY family transcription factor [Medicago truncatula] >gi|657400607|gb|KEH39749.1| WRKY family transcription factor [Medicago truncatula]	gi|571449630|ref|XM_003522620.2|	184	4e-43	PREDICTED: Glycine max WRKY50 protein (WRKY50), mRNA	Q9SJA8	155	3e-54	WRK17_ARATH Probable WRKY transcription factor 17 OS=Arabidopsis thaliana GN=WRKY17 PE=2 SV=2	--	--	--	--	--	K13425	3e-18	59.7	rcu:RCOM_1616660	WRKY transcription factor 22
CL515.Contig6_All	1.4221	4.8527	2.8495	4.0004	0.8228	1.8145	0.2931	0.3366	2.1027	4.4183	94.7	8e-19	PREDICTED: probable WRKY transcription factor 17 [Cicer arietinum]	gi|571449630|ref|XM_003522620.2|	333	5e-88	PREDICTED: Glycine max WRKY50 protein (WRKY50), mRNA	Q9SJA8	314	4e-102	WRK17_ARATH Probable WRKY transcription factor 17 OS=Arabidopsis thaliana GN=WRKY17 PE=2 SV=2	--	--	--	--	--	K13425	2e-26	111	pop:POPTR_755334	WRKY transcription factor 22
CL515.Contig8_All	12.1125	31.8132	14.7361	19.7769	7.5788	7.5975	2.1134	2.761	27.4615	47.1696	402.1	2e-136	hypothetical protein GLYMA_04G076200 [Glycine max]	gi|571449630|ref|XM_003522620.2|	446	1e-122	PREDICTED: Glycine max WRKY50 protein (WRKY50), mRNA	Q9SJA8	332	3e-110	WRK17_ARATH Probable WRKY transcription factor 17 OS=Arabidopsis thaliana GN=WRKY17 PE=2 SV=2	--	--	--	--	--	K13425	5e-27	112	pop:POPTR_755334	WRKY transcription factor 22
CL5189.Contig1_All	0.0782	0.3924	0	0.0964	0	0	3.1665	5.5501	0	0.0873	243.8	2e-77	PREDICTED: transcription factor WER [Vitis vinifera] >gi|297733776|emb|CBI15023.3| unnamed protein product [Vitis vinifera]	gi|359491527|ref|XM_002279092.2|	218	1e-53	PREDICTED: Vitis vinifera transcription factor WER-like (LOC100244963), mRNA	Q9SEI0	205	1e-64	WER_ARATH Transcription factor WER OS=Arabidopsis thaliana GN=WER PE=1 SV=1	ECU11g1690	110	7e-28	COG5147	Myb superfamily proteins, including transcription factors and mRNA splicing factors	K09422	3e-81	249	vvi:100244963	myb proto-oncogene protein, plant
CL5189.Contig2_All	0.2709	0	0	0	0	0	2.1056	2.5007	0	0	65.9	1e-54	PREDICTED: transcription factor WER [Vitis vinifera] >gi|297733776|emb|CBI15023.3| unnamed protein product [Vitis vinifera]	gi|161318453|gb|EU028331.1|	111	2e-21	Glycine max clone BAC gmw1-89M01 genomic sequence	Q9SEI0	134	2e-44	WER_ARATH Transcription factor WER OS=Arabidopsis thaliana GN=WER PE=1 SV=1	ECU11g1690	72	7e-14	COG5147	Myb superfamily proteins, including transcription factors and mRNA splicing factors	K09422	9e-58	172	vvi:100244963	myb proto-oncogene protein, plant
CL5189.Contig4_All	0.0722	0	0	0	0	0	2.4498	3.556	0	0	65.9	4e-59	PREDICTED: transcription factor WER [Vitis vinifera] >gi|297733776|emb|CBI15023.3| unnamed protein product [Vitis vinifera]	gi|359491527|ref|XM_002279092.2|	190	3e-45	PREDICTED: Vitis vinifera transcription factor WER-like (LOC100244963), mRNA	Q9SEI0	150	4e-49	WER_ARATH Transcription factor WER OS=Arabidopsis thaliana GN=WER PE=1 SV=1	ECU11g1690	86.7	8e-21	COG5147	Myb superfamily proteins, including transcription factors and mRNA splicing factors	K09422	2e-62	188	vvi:100244963	myb proto-oncogene protein, plant
CL5317.Contig6_All	0.4234	0.9179	0.9306	0.3797	0	0.0357	0.5803	0.6925	2.1399	1.4189	75.5	7e-13	hypothetical protein GLYMA_10G126900 [Glycine max] >gi|947084780|gb|KRH33501.1| hypothetical protein GLYMA_10G126900 [Glycine max]	gi|363807989|ref|NM_001255531.1|	301	2e-78	Glycine max GATA transcription factor 1-like (LOC100784527), mRNA	Q8LAU9	178	2e-50	GATA1_ARATH GATA transcription factor 1 OS=Arabidopsis thaliana GN=GATA1 PE=2 SV=2	YMR136w	56.6	1e-07	COG5641	GATA Zn-finger-containing transcription factor	--	--	--	--	--
CL531.Contig10_All	5.5299	4.7994	8.5644	10.1198	17.2357	12.1466	1.7183	2.7015	5.6366	3.483	428.3	1e-139	CCAAT-binding transcription factor family protein [Glycine max] >gi|257136301|gb|ACV44452.1| CCAAT-binding transcription factor family protein [Glycine max] >gi|734313489|gb|KHN01386.1| Nuclear transcription factor Y subunit A-3 [Glycine soja]	gi|571463928|ref|XM_006582802.1|	345	2e-91	PREDICTED: Glycine max CCAAT-binding transcription factor family protein (NF-YA1), transcript variant X4, mRNA	Q93ZH2	218	5e-63	NFYA3_ARATH Nuclear transcription factor Y subunit A-3 OS=Arabidopsis thaliana GN=NFYA3 PE=2 SV=2	YGL237c	86.7	6e-18	COG5224	CCAAT-binding factor, subunit B	K08064	8e-44	160	sbi:SORBI_01g045500	nuclear transcription factor Y, alpha
CL531.Contig11_All	0.9065	0.6095	1.4974	0.0798	0.0599	0.0901	0.3355	0.3065	2.2595	1.3743	436	1e-143	CCAAT-binding transcription factor family protein [Glycine max] >gi|257136301|gb|ACV44452.1| CCAAT-binding transcription factor family protein [Glycine max] >gi|734313489|gb|KHN01386.1| Nuclear transcription factor Y subunit A-3 [Glycine soja]	gi|571463928|ref|XM_006582802.1|	299	1e-77	PREDICTED: Glycine max CCAAT-binding transcription factor family protein (NF-YA1), transcript variant X4, mRNA	Q93ZH2	214	3e-62	NFYA3_ARATH Nuclear transcription factor Y subunit A-3 OS=Arabidopsis thaliana GN=NFYA3 PE=2 SV=2	YGL237c	85.5	1e-17	COG5224	CCAAT-binding factor, subunit B	K08064	8e-45	163	sbi:SORBI_01g045500	nuclear transcription factor Y, alpha
CL5358.Contig3_All	0.7054	0.3794	0.4766	0.1864	0	0	1.614	1.3834	0.8344	0.2251	79.3	4e-14	PREDICTED: NAC domain-containing protein 72-like [Pyrus x bretschneideri]	gi|470109620|ref|XM_004291043.1|	69.9	1e-08	PREDICTED: Fragaria vesca subsp. vesca NAC domain-containing protein 72-like (LOC101299923), mRNA	Q9LD44	66.2	2e-11	NAC56_ARATH NAC transcription factor 56 OS=Arabidopsis thaliana GN=NAC056 PE=2 SV=1	--	--	--	--	--	--	--	--	--	--
CL5382.Contig1_All	1.4989	15.5751	6.3021	3.5247	0.0323	0.0647	0.0657	0	15.3796	16.5099	189.9	3e-51	PREDICTED: probable WRKY transcription factor 53 [Glycine max] >gi|947047525|gb|KRG97154.1| hypothetical protein GLYMA_19G254800 [Glycine max]	gi|571560649|ref|XM_003554714.2|	268	3e-68	PREDICTED: Glycine max probable WRKY transcription factor 53-like (LOC100790050), mRNA	Q8H0Y8	109	5e-26	WRK41_ARATH Probable WRKY transcription factor 41 OS=Arabidopsis thaliana GN=WRKY41 PE=2 SV=2	--	--	--	--	--	K13426	2e-07	55.5	rcu:RCOM_1689100	WRKY transcription factor 29
CL5382.Contig3_All	0.7972	8.1474	3.7109	1.4745	0.1054	0	0	0	6.062	10.3046	409.5	4e-138	PREDICTED: probable WRKY transcription factor 53 [Glycine max] >gi|947047525|gb|KRG97154.1| hypothetical protein GLYMA_19G254800 [Glycine max]	gi|571560649|ref|XM_003554714.2|	276	8e-71	PREDICTED: Glycine max probable WRKY transcription factor 53-like (LOC100790050), mRNA	Q8H0Y8	177	4e-51	WRK41_ARATH Probable WRKY transcription factor 41 OS=Arabidopsis thaliana GN=WRKY41 PE=2 SV=2	--	--	--	--	--	K13426	3e-17	84.3	rcu:RCOM_1689100	WRKY transcription factor 29
CL5382.Contig4_All	0.9561	18.7001	2.01	0.2456	0.0738	0	0	0	14.231	19.536	177.9	2e-47	PREDICTED: probable WRKY transcription factor 53 [Glycine max] >gi|947047525|gb|KRG97154.1| hypothetical protein GLYMA_19G254800 [Glycine max]	gi|571447282|ref|XM_003521756.2|	206	9e-50	PREDICTED: Glycine max WRKY43 protein (WRKY43), mRNA	Q9FL62	104	2e-24	WRK30_ARATH Probable WRKY transcription factor 30 OS=Arabidopsis thaliana GN=WRKY30 PE=2 SV=1	--	--	--	--	--	K13426	5e-08	57	rcu:RCOM_1689100	WRKY transcription factor 29
CL5382.Contig5_All	4.5225	89.0424	23.9406	8.8692	0.4035	0.0506	0.154	0.1548	37.5113	97.5094	397.5	4e-133	PREDICTED: probable WRKY transcription factor 53 [Glycine max] >gi|947047525|gb|KRG97154.1| hypothetical protein GLYMA_19G254800 [Glycine max]	gi|571447282|ref|XM_003521756.2|	323	4e-85	PREDICTED: Glycine max WRKY43 protein (WRKY43), mRNA	Q9FL62	169	4e-48	WRK30_ARATH Probable WRKY transcription factor 30 OS=Arabidopsis thaliana GN=WRKY30 PE=2 SV=1	--	--	--	--	--	K13426	1e-17	85.5	rcu:RCOM_1689100	WRKY transcription factor 29
CL5382.Contig6_All	1.0471	5.6513	2.4214	0.9684	0.0485	0	0	0	5.6976	5.8485	192.2	2e-56	Putative WRKY transcription factor 41 [Glycine soja]	gi|571447282|ref|XM_003521756.2|	155	2e-34	PREDICTED: Glycine max WRKY43 protein (WRKY43), mRNA	Q8H0Y8	109	3e-26	WRK41_ARATH Probable WRKY transcription factor 41 OS=Arabidopsis thaliana GN=WRKY41 PE=2 SV=2	--	--	--	--	--	--	--	--	--	--
CL5382.Contig7_All	8.58	62.5407	38.204	17.0863	0.1973	0.1978	0.3013	0.2018	45.8289	77.0937	502.3	5e-174	PREDICTED: probable WRKY transcription factor 53 [Glycine max] >gi|947047525|gb|KRG97154.1| hypothetical protein GLYMA_19G254800 [Glycine max]	gi|571560649|ref|XM_003554714.2|	414	1e-112	PREDICTED: Glycine max probable WRKY transcription factor 53-like (LOC100790050), mRNA	Q9SUP6	176	2e-50	WRK53_ARATH Probable WRKY transcription factor 53 OS=Arabidopsis thaliana GN=WRKY53 PE=1 SV=1	--	--	--	--	--	K13426	1e-16	82.8	rcu:RCOM_1689100	WRKY transcription factor 29
CL5437.Contig1_All	0.9579	2.5969	3.0609	3.4019	0.0709	0.3911	0.1083	0.2902	2.1755	3.0817	825.5	0	Myc2 bHLH protein isoform 1 [Theobroma cacao] >gi|590721153|ref|XP_007051528.1| Myc2 bHLH protein isoform 1 [Theobroma cacao] >gi|508703788|gb|EOX95684.1| Myc2 bHLH protein isoform 1 [Theobroma cacao] >gi|508703789|gb|EOX95685.1| Myc2 bHLH protein isoform 1 [Theobroma cacao]	gi|292787165|dbj|AK338732.1|	400	1e-108	Lotus japonicus cDNA, clone: LjFL3-004-AC10, HTC	Q9LNJ5	520	2e-176	BH013_ARATH Transcription factor bHLH13 OS=Arabidopsis thaliana GN=BHLH13 PE=2 SV=1	--	--	--	--	--	K13422	6e-81	273	pop:POPTR_836925	transcription factor MYC2
CL5437.Contig2_All	2.4425	10.0038	8.6032	13.2104	1.071	1.5906	0.4441	0.5275	6.184	8.1855	115.5	1e-24	hypothetical protein PRUPE_ppa002985mg [Prunus persica] >gi|462416666|gb|EMJ21403.1| hypothetical protein PRUPE_ppa002985mg [Prunus persica]	gi|292787165|dbj|AK338732.1|	323	5e-85	Lotus japonicus cDNA, clone: LjFL3-004-AC10, HTC	Q9LNJ5	250	6e-74	BH013_ARATH Transcription factor bHLH13 OS=Arabidopsis thaliana GN=BHLH13 PE=2 SV=1	--	--	--	--	--	K13422	8e-46	175	bdi:100836477	transcription factor MYC2
CL5437.Contig3_All	10.4926	21.0713	32.3982	30.1231	1.548	3.5296	3.1203	2.67	10.6661	15.1642	413.7	0	Myc2 bHLH protein isoform 1 [Theobroma cacao] >gi|590721153|ref|XP_007051528.1| Myc2 bHLH protein isoform 1 [Theobroma cacao] >gi|508703788|gb|EOX95684.1| Myc2 bHLH protein isoform 1 [Theobroma cacao] >gi|508703789|gb|EOX95685.1| Myc2 bHLH protein isoform 1 [Theobroma cacao]	gi|292787165|dbj|AK338732.1|	385	1e-103	Lotus japonicus cDNA, clone: LjFL3-004-AC10, HTC	Q9LNJ5	328	3e-156	BH013_ARATH Transcription factor bHLH13 OS=Arabidopsis thaliana GN=BHLH13 PE=2 SV=1	--	--	--	--	--	K13422	9e-45	174	mtr:MTR_5g030430	transcription factor MYC2
CL5437.Contig5_All	0.3806	0.637	1.567	1.6428	0.1174	0.2355	0.0299	0.0901	1.1256	1.3819	894	0	Myc2 bHLH protein isoform 1 [Theobroma cacao] >gi|590721153|ref|XP_007051528.1| Myc2 bHLH protein isoform 1 [Theobroma cacao] >gi|508703788|gb|EOX95684.1| Myc2 bHLH protein isoform 1 [Theobroma cacao] >gi|508703789|gb|EOX95685.1| Myc2 bHLH protein isoform 1 [Theobroma cacao]	gi|292787165|dbj|AK338732.1|	406	1e-110	Lotus japonicus cDNA, clone: LjFL3-004-AC10, HTC	Q9LNJ5	569	0	BH013_ARATH Transcription factor bHLH13 OS=Arabidopsis thaliana GN=BHLH13 PE=2 SV=1	--	--	--	--	--	K13422	2e-76	265	vvi:100250607	transcription factor MYC2
CL5437.Contig6_All	0.0638	0.6803	0.5697	0.7863	0.0295	0.1479	0.03	0	0.6034	0.5699	897.9	0	Myc2 bHLH protein isoform 1 [Theobroma cacao] >gi|590721153|ref|XP_007051528.1| Myc2 bHLH protein isoform 1 [Theobroma cacao] >gi|508703788|gb|EOX95684.1| Myc2 bHLH protein isoform 1 [Theobroma cacao] >gi|508703789|gb|EOX95685.1| Myc2 bHLH protein isoform 1 [Theobroma cacao]	gi|292787165|dbj|AK338732.1|	406	1e-110	Lotus japonicus cDNA, clone: LjFL3-004-AC10, HTC	Q9LNJ5	568	0	BH013_ARATH Transcription factor bHLH13 OS=Arabidopsis thaliana GN=BHLH13 PE=2 SV=1	--	--	--	--	--	K13422	9e-80	273	pop:POPTR_836925	transcription factor MYC2
CL5437.Contig7_All	0.5462	1.8146	3.1406	2.8921	0.0595	0.3876	0.0303	0.1825	1.3301	2.261	887.5	0	Myc2 bHLH protein isoform 1 [Theobroma cacao] >gi|590721153|ref|XP_007051528.1| Myc2 bHLH protein isoform 1 [Theobroma cacao] >gi|508703788|gb|EOX95684.1| Myc2 bHLH protein isoform 1 [Theobroma cacao] >gi|508703789|gb|EOX95685.1| Myc2 bHLH protein isoform 1 [Theobroma cacao]	gi|292787165|dbj|AK338732.1|	422	1e-114	Lotus japonicus cDNA, clone: LjFL3-004-AC10, HTC	Q9LNJ5	563	0	BH013_ARATH Transcription factor bHLH13 OS=Arabidopsis thaliana GN=BHLH13 PE=2 SV=1	--	--	--	--	--	K13422	2e-79	273	rcu:RCOM_0864470	transcription factor MYC2
CL5440.Contig2_All	0	0	0.143	0	0	0	9.2287	7.8572	0	0	302.4	2e-98	PREDICTED: myb-related protein 308-like [Vigna radiata var. radiata]	gi|571530550|ref|XM_003548315.2|	216	5e-53	PREDICTED: Glycine max transcription factor TT2-like (LOC100809225), mRNA	P10290	182	2e-54	MYBC_MAIZE Anthocyanin regulatory C1 protein OS=Zea mays GN=C1 PE=2 SV=1	ECU11g1690	87	4e-19	COG5147	Myb superfamily proteins, including transcription factors and mRNA splicing factors	K09422	2e-87	270	vvi:100244605	myb proto-oncogene protein, plant
CL5440.Contig3_All	0.0794	0	0	0	0.0735	0	25.0724	21.2849	0	0	322.4	3e-107	PREDICTED: myb-related protein 308-like [Vigna radiata var. radiata]	gi|571530550|ref|XM_003548315.2|	325	7e-86	PREDICTED: Glycine max transcription factor TT2-like (LOC100809225), mRNA	P10290	202	7e-63	MYBC_MAIZE Anthocyanin regulatory C1 protein OS=Zea mays GN=C1 PE=2 SV=1	ECU11g1690	107	1e-26	COG5147	Myb superfamily proteins, including transcription factors and mRNA splicing factors	K09422	5e-96	290	vvi:100244605	myb proto-oncogene protein, plant
CL5440.Contig6_All	0	0.113	0	0	0	0.0836	6.0241	6.0538	0.3196	0	257.3	2e-82	Duplicated homeodomain-like superfamily protein, putative [Theobroma cacao] >gi|508779977|gb|EOY27233.1| Duplicated homeodomain-like superfamily protein, putative [Theobroma cacao]	gi|571464751|ref|XM_003529785.2|	260	3e-66	PREDICTED: Glycine max transcription repressor MYB4-like (LOC100804950), mRNA	Q9FJA2	201	3e-63	TT2_ARATH Transcription factor TT2 OS=Arabidopsis thaliana GN=TT2 PE=1 SV=1	ECU11g1690	95.5	1e-22	COG5147	Myb superfamily proteins, including transcription factors and mRNA splicing factors	K09422	4e-79	244	vvi:100244605	myb proto-oncogene protein, plant
CL5470.Contig6_All	0.4471	0.4081	0.3418	0.401	1.7683	1.3578	0.1532	0	0.0481	0.4086	452.2	6e-151	PREDICTED: transcription factor TCP9-like [Jatropha curcas] >gi|643712098|gb|KDP25526.1| hypothetical protein JCGZ_20682 [Jatropha curcas]	gi|470129705|ref|XM_004300702.1|	188	2e-44	PREDICTED: Fragaria vesca subsp. vesca transcription factor TCP9-like (LOC101296009), mRNA	O64647	229	2e-68	TCP9_ARATH Transcription factor TCP9 OS=Arabidopsis thaliana GN=TCP9 PE=1 SV=1	--	--	--	--	--	--	--	--	--	--
CL5529.Contig1_All	19.2792	83.2445	39.6696	130.527	0.4823	0.4145	0.0701	0	48.1636	102.361	251.5	5e-80	hypothetical protein LR48_Vigan09g073600 [Vigna angularis] >gi|965658562|dbj|BAT74981.1| hypothetical protein VIGAN_01277300 [Vigna angularis var. angularis]	gi|292668992|gb|GU732482.1|	107	3e-20	Malus x domestica AP2 domain class transcription factor (AP2D58) mRNA, complete cds	Q9SZ06	154	8e-44	EF109_ARATH Ethylene-responsive transcription factor ERF109 OS=Arabidopsis thaliana GN=ERF109 PE=1 SV=1	--	--	--	--	--	K09286	6e-27	107	ath:AT5G44210	EREBP-like factor
CL5529.Contig2_All	37.9372	157.385	77.8912	237.406	0.9846	0.5484	0	0.3357	97.2996	203.71	190.3	3e-58	hypothetical protein LR48_Vigan09g073600 [Vigna angularis] >gi|965658562|dbj|BAT74981.1| hypothetical protein VIGAN_01277300 [Vigna angularis var. angularis]	gi|571433622|ref|XM_003516904.2|	157	2e-35	PREDICTED: Glycine max probable xyloglucan endotransglucosylase/hydrolase protein 30-like (LOC100786236), mRNA	Q9SZ06	128	1e-35	EF109_ARATH Ethylene-responsive transcription factor ERF109 OS=Arabidopsis thaliana GN=ERF109 PE=1 SV=1	YDL140c	52.4	4e-07	COG0086	DNA-directed RNA polymerase, beta' subunit/160 kD subunit	K08235	2e-30	117	mtr:MTR_5g029100	xyloglucan:xyloglucosyl transferase [EC:2.4.1.207]
CL5536.Contig1_All	3.3305	1.2796	2.3577	5.5318	0.8809	3.4691	0.5123	0.7079	4.824	2.9612	229.2	2e-69	hypothetical protein CISIN_1g017825mg [Citrus sinensis]	gi|568873600|ref|XM_006489859.1|	198	1e-47	PREDICTED: Citrus sinensis nuclear transcription factor Y subunit A-1-like (LOC102620218), transcript variant X3, mRNA	Q945M9	128	2e-33	NFYA9_ARATH Nuclear transcription factor Y subunit A-9 OS=Arabidopsis thaliana GN=NFYA9 PE=2 SV=1	YGL237c	86.7	2e-18	COG5224	CCAAT-binding factor, subunit B	K08064	4e-53	181	gmx:100782085	nuclear transcription factor Y, alpha
CL5565.Contig3_All	3.7094	4.8885	0.195	1.1435	0	0.2869	0.8738	0.6439	1.8282	2.0719	544.7	0	hypothetical protein LR48_Vigan01g232500 [Vigna angularis] >gi|965659627|dbj|BAT76046.1| hypothetical protein VIGAN_01400000 [Vigna angularis var. angularis]	gi|571453688|ref|XM_003525513.2|	420	1e-114	PREDICTED: Glycine max uncharacterized LOC100811140 (LOC100811140), mRNA	Q8LPH6	249	2e-78	MYB86_ARATH Transcription factor MYB86 OS=Arabidopsis thaliana GN=MYB86 PE=2 SV=1	ECU11g1690	110	2e-27	COG5147	Myb superfamily proteins, including transcription factors and mRNA splicing factors	K09422	0	541	gmx:100811140	myb proto-oncogene protein, plant
CL5640.Contig2_All	0	0	0	0	0.6835	0.5798	0	0	0.2016	0.0635	124.8	1e-75	PREDICTED: AP2/ERF and B3 domain-containing transcription factor At1g50680-like isoform X1 [Vitis vinifera] >gi|731407715|ref|XP_010656594.1| PREDICTED: AP2/ERF and B3 domain-containing transcription factor At1g50680-like isoform X1 [Vitis vinifera]	gi|571571792|ref|XM_006606882.1|	85.7	2e-13	PREDICTED: Glycine max AP2/ERF and B3 domain-containing transcription factor At1g50680-like (LOC102660503), mRNA	Q9C6P5	139	7e-59	RAVL2_ARATH AP2/ERF and B3 domain-containing transcription factor At1g50680 OS=Arabidopsis thaliana GN=At1g50680 PE=2 SV=1	--	--	--	--	--	K09287	3e-76	181	vvi:100250084	RAV-like factor
CL5640.Contig4_All	0.8355	1.1591	1.0631	0.7592	7.5715	4.8969	0.0829	0.0833	1.6645	2.014	129.8	2e-78	PREDICTED: AP2/ERF and B3 domain-containing transcription factor At1g50680-like isoform X1 [Vitis vinifera] >gi|731407715|ref|XP_010656594.1| PREDICTED: AP2/ERF and B3 domain-containing transcription factor At1g50680-like isoform X1 [Vitis vinifera]	gi|571571792|ref|XM_006606882.1|	85.7	2e-13	PREDICTED: Glycine max AP2/ERF and B3 domain-containing transcription factor At1g50680-like (LOC102660503), mRNA	Q9C6P5	144	3e-61	RAVL2_ARATH AP2/ERF and B3 domain-containing transcription factor At1g50680 OS=Arabidopsis thaliana GN=At1g50680 PE=2 SV=1	--	--	--	--	--	K09287	4e-79	186	vvi:100250084	RAV-like factor
CL5640.Contig5_All	0.3754	0.2998	0.1076	0.2525	0.6317	1.2666	0.0643	0.1292	0.4036	0.6861	124.8	3e-75	PREDICTED: AP2/ERF and B3 domain-containing transcription factor At1g50680-like isoform X1 [Vitis vinifera] >gi|731407715|ref|XP_010656594.1| PREDICTED: AP2/ERF and B3 domain-containing transcription factor At1g50680-like isoform X1 [Vitis vinifera]	gi|387849071|ref|NR_048594.1|	97.6	7e-17	Glycine max microRNA MIR156a (MIR156A), microRNA	Q9C6P5	139	1e-58	RAVL2_ARATH AP2/ERF and B3 domain-containing transcription factor At1g50680 OS=Arabidopsis thaliana GN=At1g50680 PE=2 SV=1	--	--	--	--	--	K09287	5e-76	181	vvi:100250084	RAV-like factor
CL5649.Contig1_All	0.0393	0.0494	0.9098	0.2911	1.3476	1.1683	0.4819	0.4098	2.8389	2.0657	142.1	8e-139	MYB transcription factor MYB177 [Glycine max] >gi|110931734|gb|ABH02866.1| MYB transcription factor MYB177 [Glycine max]	gi|292789550|dbj|AK339119.1|	268	3e-68	Lotus japonicus cDNA, clone: LjFL3-047-BG02, HTC	F4KGY6	121	2e-52	RVE1_ARATH Protein REVEILLE 1 OS=Arabidopsis thaliana GN=RVE1 PE=2 SV=1	--	--	--	--	--	K12133	1e-21	77.8	aly:ARALYDRAFT_470177	LATE ELONGATED HYPOCOTYL
CL5649.Contig2_All	1.0327	0.8024	0.4135	0.5458	3.4596	2.6924	1.0657	0.7915	2.9666	2.0875	449.1	2e-151	hypothetical protein GLYMA_14G210600 [Glycine max]	gi|402744345|ref|NM_001249103.2|	432	1e-118	Glycine max MYB transcription factor MYB173 (MYB173), mRNA	F4KGY6	246	2e-75	RVE1_ARATH Protein REVEILLE 1 OS=Arabidopsis thaliana GN=RVE1 PE=2 SV=1	--	--	--	--	--	K12133	8e-38	150	aly:ARALYDRAFT_470177	LATE ELONGATED HYPOCOTYL
CL5649.Contig3_All	0.1934	0.2427	1.2873	1.1525	4.6242	5.8618	1.9738	1.4647	5.4515	5.5803	143.3	2e-34	MYB transcription factor MYB177 [Glycine max] >gi|110931734|gb|ABH02866.1| MYB transcription factor MYB177 [Glycine max]	gi|402744345|ref|NM_001249103.2|	252	2e-63	Glycine max MYB transcription factor MYB173 (MYB173), mRNA	F4KGY6	117	8e-28	RVE1_ARATH Protein REVEILLE 1 OS=Arabidopsis thaliana GN=RVE1 PE=2 SV=1	--	--	--	--	--	K12133	2e-15	82.4	aly:ARALYDRAFT_470177	LATE ELONGATED HYPOCOTYL
CL5649.Contig5_All	1.4725	1.5542	0.1407	0.0825	0.5267	0.6832	0.1577	0.0317	0.1188	0.6729	321.2	7e-100	hypothetical protein GLYMA_14G210600 [Glycine max]	gi|402744345|ref|NM_001249103.2|	180	6e-42	Glycine max MYB transcription factor MYB173 (MYB173), mRNA	F4KGY6	119	2e-28	RVE1_ARATH Protein REVEILLE 1 OS=Arabidopsis thaliana GN=RVE1 PE=2 SV=1	--	--	--	--	--	K12133	1e-19	95.9	ath:AT1G01060	LATE ELONGATED HYPOCOTYL
CL5649.Contig6_All	0	0.042	0.2811	0.2473	1.3617	1.4271	0.504	0.6647	2.4518	1.6058	184.5	2e-48	MYB transcription factor MYB177 [Glycine max] >gi|110931734|gb|ABH02866.1| MYB transcription factor MYB177 [Glycine max]	gi|402744345|ref|NM_001249103.2|	373	1e-100	Glycine max MYB transcription factor MYB173 (MYB173), mRNA	F4KGY6	146	9e-38	RVE1_ARATH Protein REVEILLE 1 OS=Arabidopsis thaliana GN=RVE1 PE=2 SV=1	--	--	--	--	--	K12134	9e-27	117	ath:AT2G46830	circadian clock associated 1
CL5649.Contig7_All	0.3231	0.2704	1.6227	1.5938	3.988	7.3294	2.6385	3.0934	10.4893	6.2563	557	0	MYB transcription factor MYB177 [Glycine max] >gi|110931734|gb|ABH02866.1| MYB transcription factor MYB177 [Glycine max]	gi|402744345|ref|NM_001249103.2|	533	1e-148	Glycine max MYB transcription factor MYB173 (MYB173), mRNA	F4KGY6	258	5e-78	RVE1_ARATH Protein REVEILLE 1 OS=Arabidopsis thaliana GN=RVE1 PE=2 SV=1	--	--	--	--	--	K12133	1e-37	151	aly:ARALYDRAFT_470177	LATE ELONGATED HYPOCOTYL
CL5649.Contig8_All	3.7171	2.3558	0.1547	0.0454	0.6132	1.2295	0.3121	0.906	0.653	0.4933	149.8	2e-111	putative MYB-related protein 13 [Arachis hypogaea]	gi|402744345|ref|NM_001249103.2|	389	1e-104	Glycine max MYB transcription factor MYB173 (MYB173), mRNA	F4KGY6	206	3e-59	RVE1_ARATH Protein REVEILLE 1 OS=Arabidopsis thaliana GN=RVE1 PE=2 SV=1	--	--	--	--	--	K12133	3e-36	147	aly:ARALYDRAFT_470177	LATE ELONGATED HYPOCOTYL
CL5673.Contig1_All	0.076	0	0.5594	0.7501	1.6892	1.1994	0	0	0.1799	0.0849	388.7	1e-132	Myb domain protein 93 [Theobroma cacao] >gi|508700198|gb|EOX92094.1| Myb domain protein 93 [Theobroma cacao]	gi|571434385|ref|XM_006573119.1|	474	1e-130	PREDICTED: Glycine max transcription factor MYB39-like (LOC100785374), mRNA	Q8GWP0	231	1e-72	MYB39_ARATH Transcription factor MYB39 OS=Arabidopsis thaliana GN=MYB39 PE=2 SV=1	ECU11g1690	108	4e-27	COG5147	Myb superfamily proteins, including transcription factors and mRNA splicing factors	K09422	2e-126	369	pop:POPTR_562588	myb proto-oncogene protein, plant
CL5673.Contig2_All	0	0	0.2205	1.0347	0.4531	0.4542	0	0	0.4136	0.1562	370.2	8e-125	Myb domain protein 93 [Theobroma cacao] >gi|508700198|gb|EOX92094.1| Myb domain protein 93 [Theobroma cacao]	gi|571434385|ref|XM_006573119.1|	291	1e-75	PREDICTED: Glycine max transcription factor MYB39-like (LOC100785374), mRNA	Q8GWP0	213	4e-65	MYB39_ARATH Transcription factor MYB39 OS=Arabidopsis thaliana GN=MYB39 PE=2 SV=1	ECU11g1690	91.3	1e-20	COG5147	Myb superfamily proteins, including transcription factors and mRNA splicing factors	K09422	1e-118	351	pop:POPTR_562588	myb proto-oncogene protein, plant
CL5677.Contig3_All	0.5361	0	0.0939	0	0.9099	1.2438	0	0.0846	0.1057	0.0998	136.7	1e-35	PREDICTED: transcription factor ALC-like isoform X2 [Vigna radiata var. radiata]	gi|571508303|ref|XM_006595911.1|	149	8e-33	PREDICTED: Glycine max transcription factor SPATULA-like (LOC100785332), mRNA	Q9FUA4	48.9	3e-06	SPT_ARATH Transcription factor SPATULA OS=Arabidopsis thaliana GN=SPT PE=1 SV=1	--	--	--	--	--	--	--	--	--	--
CL5691.Contig4_All	8.602	16.1342	3.1494	5.3037	0.1342	0.3588	6.1014	5.3993	2.9153	3.455	688	0	Myb family transcription factor APL [Glycine soja]	gi|571494152|ref|XM_003540199.2|	858	0	PREDICTED: Glycine max uncharacterized LOC100810396 (LOC100810396), mRNA	Q9SQQ9	453	2e-155	PHL9_ARATH Myb-related protein 2 OS=Arabidopsis thaliana GN=MYR2 PE=1 SV=1	--	--	--	--	--	K14491	9e-14	73.2	ppp:PHYPADRAFT_152341	two-component response regulator ARR-B family
CL5699.Contig13_All	1.2301	2.7245	1.8507	3.6582	1.7191	2.932	0.3636	0.4111	5.3636	5.0113	692.2	0	KNAT3-like transcription factor [Juglans nigra]	gi|210160855|gb|FJ388876.1|	735	0	Juglans nigra KNAT3-like transcription factor mRNA, complete cds	O04136	642	0	KNAP3_MALDO Homeobox protein knotted-1-like 3 OS=Malus domestica PE=2 SV=1	Rv0312	55.8	5e-07	COG0443	Molecular chaperone	--	--	--	--	--
CL5699.Contig1_All	2.8275	2.4794	4.3972	3.6778	5.5935	9.9924	2.8831	1.9804	5.0399	3.3317	718.4	0	KNAT3-like transcription factor [Juglans nigra]	gi|571509139|ref|XM_006596019.1|	797	0	PREDICTED: Glycine max homeobox protein knotted-1-like 3-like (LOC100812596), transcript variant X2, mRNA	O04136	660	0	KNAP3_MALDO Homeobox protein knotted-1-like 3 OS=Malus domestica PE=2 SV=1	Rv0312	55.1	5e-07	COG0443	Molecular chaperone	K01115	8e-06	50.4	vcn:VOLCADRAFT_99471	phospholipase D [EC:3.1.4.4]
CL5699.Contig3_All	5.0043	4.2871	8.7671	7.1995	7.5002	12.1994	3.8918	3.5725	11.5102	5.9008	707.2	0	KNAT3-like transcription factor [Juglans nigra]	gi|210145918|dbj|AK244609.1|	775	0	Glycine max cDNA, clone: GMFL01-08-B17	O04136	659	0	KNAP3_MALDO Homeobox protein knotted-1-like 3 OS=Malus domestica PE=2 SV=1	Rv0312	55.8	3e-07	COG0443	Molecular chaperone	K01115	8e-06	50.4	vcn:VOLCADRAFT_99471	phospholipase D [EC:3.1.4.4]
CL5715.Contig24_All	2.675	12.465	9.5342	6.7489	0.4839	0.856	0.5215	0.262	16.1119	17.6199	139.4	4e-32	NAC domain protein [Glycine max] >gi|513044649|gb|AGO14647.1| NAC transcription factor [Glycine max]	gi|571511382|ref|XM_006596349.1|	474	1e-130	PREDICTED: Glycine max NAC domain-containing protein 12-like (LOC100778903), mRNA	F4JN35	285	1e-85	NTL9_ARATH Protein NTM1-like 9 OS=Arabidopsis thaliana GN=NTL9 PE=1 SV=1	--	--	--	--	--	--	--	--	--	--
CL5715.Contig25_All	1.707	8.8816	7.797	6.468	0.431	0.8928	0.6141	0.4114	9.3616	11.8572	139.4	4e-32	NAC domain protein [Glycine max] >gi|513044649|gb|AGO14647.1| NAC transcription factor [Glycine max]	gi|571511382|ref|XM_006596349.1|	474	1e-130	PREDICTED: Glycine max NAC domain-containing protein 12-like (LOC100778903), mRNA	F4JN35	298	2e-90	NTL9_ARATH Protein NTM1-like 9 OS=Arabidopsis thaliana GN=NTL9 PE=1 SV=1	--	--	--	--	--	--	--	--	--	--
CL5715.Contig6_All	1.3006	8.5577	5.7998	7.3872	0.6202	0.256	0.7055	0.6344	2.8904	9.2015	123.2	5e-27	NAC domain-containing protein 78 [Glycine soja]	gi|574584525|ref|NM_001289358.1|	313	5e-82	Glycine max NAC domain protein (NAC22), mRNA >gi|513044648|gb|JX569045.1| Glycine max NAC transcription factor (NAC012) mRNA, complete cds	B5X570	136	3e-33	NAC14_ARATH NAC domain-containing protein 14 OS=Arabidopsis thaliana GN=NAC014 PE=2 SV=1	--	--	--	--	--	--	--	--	--	--
CL5737.Contig1_All	0.7444	2.9523	3.1924	2.0561	0.3307	0.9394	0.1122	0.2537	3.9447	6.6855	1174.1	0	hypothetical protein PHAVU_006G171900g [Phaseolus vulgaris] >gi|561021220|gb|ESW19991.1| hypothetical protein PHAVU_006G171900g [Phaseolus vulgaris]	gi|571499787|ref|XM_003542927.2|	900	0	PREDICTED: Glycine max U-box domain-containing protein 17-like (LOC100811153), transcript variant 1, mRNA	Q9C7R6	966	0	PUB17_ARATH U-box domain-containing protein 17 OS=Arabidopsis thaliana GN=PUB17 PE=2 SV=1	--	--	--	--	--	K14431	5e-25	112	aly:ARALYDRAFT_311885	transcription factor TGA
CL5737.Contig2_All	0.7828	1.5965	0.6857	0.3218	0.2113	0.2724	0.2766	0.3088	1.2346	2.1132	1169.8	0	hypothetical protein PHAVU_006G171900g [Phaseolus vulgaris] >gi|561021220|gb|ESW19991.1| hypothetical protein PHAVU_006G171900g [Phaseolus vulgaris]	gi|571499787|ref|XM_003542927.2|	839	0	PREDICTED: Glycine max U-box domain-containing protein 17-like (LOC100811153), transcript variant 1, mRNA	Q9C7R6	958	0	PUB17_ARATH U-box domain-containing protein 17 OS=Arabidopsis thaliana GN=PUB17 PE=2 SV=1	--	--	--	--	--	K14431	4e-24	109	aly:ARALYDRAFT_311885	transcription factor TGA
CL5737.Contig3_All	0.1109	0.5009	0.5593	0.164	0.0821	0.1235	0.0836	0.021	0.6819	0.8669	1208	0	PREDICTED: U-box domain-containing protein 17 [Cicer arietinum]	gi|502078400|ref|XM_004485876.1|	1110	0	PREDICTED: Cicer arietinum U-box domain-containing protein 17-like (LOC101514941), mRNA	Q9C7R6	974	0	PUB17_ARATH U-box domain-containing protein 17 OS=Arabidopsis thaliana GN=PUB17 PE=2 SV=1	--	--	--	--	--	K14431	3e-25	114	aly:ARALYDRAFT_311885	transcription factor TGA
CL5737.Contig4_All	0.3798	1.9865	0.8651	0.6245	0.1172	0.3525	0.2088	0.1798	1.8347	3.8189	1146.7	0	hypothetical protein PHAVU_006G171900g [Phaseolus vulgaris] >gi|561021220|gb|ESW19991.1| hypothetical protein PHAVU_006G171900g [Phaseolus vulgaris]	gi|571499787|ref|XM_003542927.2|	769	0	PREDICTED: Glycine max U-box domain-containing protein 17-like (LOC100811153), transcript variant 1, mRNA	Q9C7R6	943	0	PUB17_ARATH U-box domain-containing protein 17 OS=Arabidopsis thaliana GN=PUB17 PE=2 SV=1	--	--	--	--	--	K14431	4e-24	109	aly:ARALYDRAFT_311885	transcription factor TGA
CL5737.Contig5_All	4.0901	14.272	15.215	11.3034	2.8195	6.3258	0.7379	0.9613	16.7445	24.8214	1235.7	0	PREDICTED: U-box domain-containing protein 17 [Cicer arietinum]	gi|502078400|ref|XM_004485876.1|	1205	0	PREDICTED: Cicer arietinum U-box domain-containing protein 17-like (LOC101514941), mRNA	Q9C7R6	995	0	PUB17_ARATH U-box domain-containing protein 17 OS=Arabidopsis thaliana GN=PUB17 PE=2 SV=1	--	--	--	--	--	K14431	2e-25	114	aly:ARALYDRAFT_311885	transcription factor TGA
CL5788.Contig2_All	1.654	3.3446	1.7869	4.3625	0.0851	0.8101	0.6926	0.783	4.076	3.5413	96.7	2e-19	PREDICTED: G-box-binding factor 1-like isoform X1 [Glycine max]	gi|359806399|ref|NM_001254054.1|	565	1e-158	Glycine max bZIP transcription factor bZIP115 (BZIP115), mRNA	P42774	258	1e-80	GBF1_ARATH G-box-binding factor 1 OS=Arabidopsis thaliana GN=GBF1 PE=1 SV=2	--	--	--	--	--	K09060	3e-156	455	gmx:778124	plant G-box-binding factor
CL5822.Contig1_All	0.6265	1.0484	1.0427	3.4764	0.5799	14.1465	0	0.0494	0.9263	1.9245	625.2	0	PREDICTED: probable WRKY transcription factor 31 [Vigna radiata var. radiata]	gi|151934174|gb|EU019565.1|	402	1e-109	Glycine max WRKY23 (WRKY23) mRNA, partial cds	Q93WT0	436	1e-147	WRK31_ARATH Probable WRKY transcription factor 31 OS=Arabidopsis thaliana GN=WRKY31 PE=2 SV=1	--	--	--	--	--	K13424	6e-28	119	vvi:100243352	WRKY transcription factor 33
CL5822.Contig2_All	0.3273	2.0541	2.0643	1.6145	6.0598	14.8832	0.3084	0	0.7743	3.6564	55.1	3e-08	PREDICTED: probable WRKY transcription factor 31 [Vigna radiata var. radiata]	gi|571517763|ref|XM_003546112.2|	71.9	4e-10	PREDICTED: Glycine max probable WRKY transcription factor 31-like (LOC100802124), mRNA	Q93WT0	42.7	7e-06	WRK31_ARATH Probable WRKY transcription factor 31 OS=Arabidopsis thaliana GN=WRKY31 PE=2 SV=1	--	--	--	--	--	--	--	--	--	--
CL5822.Contig3_All	0.9387	4.4882	3.5708	4.5198	6.7445	14.5591	0.2106	0.0423	2.5379	4.6936	333.2	0	PREDICTED: probable WRKY transcription factor 31 [Glycine max] >gi|947062211|gb|KRH11472.1| hypothetical protein GLYMA_15G110300 [Glycine max]	gi|210141473|dbj|AK245392.1|	264	4e-67	Glycine max cDNA, clone: GMFL01-29-D07	Q93WT0	263	9e-131	WRK31_ARATH Probable WRKY transcription factor 31 OS=Arabidopsis thaliana GN=WRKY31 PE=2 SV=1	MJ0694	54.7	4e-07	COG1498	Protein implicated in ribosomal biogenesis, Nop56p homolog	K13424	2e-19	75.1	vvi:100243352	WRKY transcription factor 33
CL5822.Contig4_All	0.4658	4.6282	3.7128	5.648	15.8814	18.4419	0.2926	0.147	1.8365	3.9457	328.6	0	hypothetical protein PHAVU_006G147800g [Phaseolus vulgaris] >gi|561020929|gb|ESW19700.1| hypothetical protein PHAVU_006G147800g [Phaseolus vulgaris]	gi|210141473|dbj|AK245392.1|	264	5e-67	Glycine max cDNA, clone: GMFL01-29-D07	Q93WT0	251	5e-127	WRK31_ARATH Probable WRKY transcription factor 31 OS=Arabidopsis thaliana GN=WRKY31 PE=2 SV=1	--	--	--	--	--	K13424	1e-14	59.3	vvi:100243352	WRKY transcription factor 33
CL5822.Contig5_All	1.2814	6.5404	5.7468	6.0044	12.9688	26.8338	0.6439	0.364	3.7388	5.3439	788.1	0	PREDICTED: probable WRKY transcription factor 31 [Glycine max] >gi|947062211|gb|KRH11472.1| hypothetical protein GLYMA_15G110300 [Glycine max]	gi|571475739|ref|XM_003534561.2|	507	1e-140	PREDICTED: Glycine max WRKY23 protein (WRKY23), mRNA	Q93WT0	486	5e-165	WRK31_ARATH Probable WRKY transcription factor 31 OS=Arabidopsis thaliana GN=WRKY31 PE=2 SV=1	--	--	--	--	--	K13424	2e-24	109	osa:4327518	WRKY transcription factor 33
CL5822.Contig6_All	0.4425	3.9432	3.4418	4.3106	7.1271	14.4947	0.0834	0.1257	1.5179	2.8175	788.1	0	PREDICTED: probable WRKY transcription factor 31 [Glycine max] >gi|947062211|gb|KRH11472.1| hypothetical protein GLYMA_15G110300 [Glycine max]	gi|571475739|ref|XM_003534561.2|	500	1e-138	PREDICTED: Glycine max WRKY23 protein (WRKY23), mRNA	Q93WT0	486	2e-165	WRK31_ARATH Probable WRKY transcription factor 31 OS=Arabidopsis thaliana GN=WRKY31 PE=2 SV=1	--	--	--	--	--	K13424	2e-24	109	osa:4327518	WRKY transcription factor 33
CL5822.Contig7_All	0.8259	3.9983	3.5138	5.1891	5.9341	15.8754	0.704	0.6703	2.2795	4.2614	328.6	0	hypothetical protein PHAVU_006G147800g [Phaseolus vulgaris] >gi|561020929|gb|ESW19700.1| hypothetical protein PHAVU_006G147800g [Phaseolus vulgaris]	gi|210141473|dbj|AK245392.1|	264	4e-67	Glycine max cDNA, clone: GMFL01-29-D07	Q93WT0	248	3e-126	WRK31_ARATH Probable WRKY transcription factor 31 OS=Arabidopsis thaliana GN=WRKY31 PE=2 SV=1	--	--	--	--	--	K13424	1e-14	59.3	vvi:100243352	WRKY transcription factor 33
CL5839.Contig1_All	4.6773	5.7457	0.9938	2.0248	1.2897	3.0475	0.3282	0.0942	4.7087	3.1127	782.7	0	TGACG-sequence-specific DNA-binding protein TGA-2.1 [Glycine soja]	gi|571502286|ref|XM_006594871.1|	890	0	PREDICTED: Glycine max bZIP transcription factor bZIP90 (BZIP90), transcript variant X4, mRNA	P43273	343	6e-114	TGA2_ARATH Transcription factor TGA2 OS=Arabidopsis thaliana GN=TGA2 PE=1 SV=1	--	--	--	--	--	K14431	0	782	gmx:100775461	transcription factor TGA
CL5884.Contig2_All	0	0	0.0609	0	1.0727	1.0216	0	0	0.5483	0.0647	219.9	4e-66	PREDICTED: transcription factor HEC1 [Vitis vinifera] >gi|302142304|emb|CBI19507.3| unnamed protein product [Vitis vinifera]	gi|571449049|ref|XM_003523555.2|	274	3e-70	PREDICTED: Glycine max transcription factor HEC1-like (LOC100815041), mRNA	Q9FHA7	171	1e-49	HEC1_ARATH Transcription factor HEC1 OS=Arabidopsis thaliana GN=HEC1 PE=1 SV=1	--	--	--	--	--	K10863	3e-16	83.6	aly:ARALYDRAFT_486946	aprataxin [EC:3.-.-.-]
CL5908.Contig2_All	184.388	150.292	131.998	44.9742	28.6812	12.6717	58.6299	49.9171	162.291	226.493	476.5	1e-162	PREDICTED: homeobox-leucine zipper protein ATHB-6-like isoform X1 [Populus euphratica]	gi|571469184|ref|XM_006584572.1|	337	3e-89	PREDICTED: Glycine max homeodomain-leucine zipper protein 56 (HDL56), transcript variant X1, mRNA	P46668	278	7e-88	ATHB6_ARATH Homeobox-leucine zipper protein ATHB-6 OS=Arabidopsis thaliana GN=ATHB-6 PE=1 SV=1	ECU03g1170	52.4	7e-07	COG5576	Homeodomain-containing transcription factor	K09338	2e-87	278	ath:AT2G22430	homeobox-leucine zipper protein
CL5908.Contig4_All	91.2417	71.7489	64.8505	30.4315	26.5923	10.0191	24.3419	23.3664	85.4645	106.017	476.5	1e-163	PREDICTED: homeobox-leucine zipper protein ATHB-6-like isoform X1 [Populus euphratica]	gi|571469184|ref|XM_006584572.1|	329	7e-87	PREDICTED: Glycine max homeodomain-leucine zipper protein 56 (HDL56), transcript variant X1, mRNA	P46668	278	1e-88	ATHB6_ARATH Homeobox-leucine zipper protein ATHB-6 OS=Arabidopsis thaliana GN=ATHB-6 PE=1 SV=1	ECU03g1170	52.4	7e-07	COG5576	Homeodomain-containing transcription factor	K09338	3e-88	278	ath:AT2G22430	homeobox-leucine zipper protein
CL5936.Contig3_All	47.4849	38.1705	56.5808	67.7662	35.3408	56.0575	36.4181	40.4704	134.076	92.3148	419.9	1e-143	PREDICTED: transcription factor MYB1R1 [Vigna radiata var. radiata]	gi|351723924|ref|NM_001249087.1|	357	3e-95	Glycine max MYB transcription factor MYB143 (MYB143), mRNA >gi|110931725|gb|DQ822921.1| Glycine max MYB transcription factor MYB143 (MYB143) mRNA, complete cds	Q2V9B0	278	3e-90	MY1R1_SOLTU Transcription factor MYB1R1 OS=Solanum tuberosum PE=2 SV=1	--	--	--	--	--	--	--	--	--	--
CL5955.Contig1_All	18.7387	42.8474	7.8983	19.6756	0.1717	0.1722	24.7355	22.0466	14.8137	19.171	284.3	7e-94	abscisic stress ripening-like protein [Glycine max] >gi|38679405|gb|AAR26524.1| abscisic stress ripening-like protein [Glycine max]	gi|571484220|ref|XM_003536376.2|	321	9e-85	PREDICTED: Glycine max POU domain, class 4, transcription factor 1-like (LOC100809999), mRNA	P37219	138	1e-40	ASR2_SOLLC Abscisic stress-ripening protein 2 OS=Solanum lycopersicum GN=ASR2 PE=4 SV=1	XF0818	76.6	9e-15	COG2730	Endoglucanase	K01115	4e-18	85.9	vcn:VOLCADRAFT_99471	phospholipase D [EC:3.1.4.4]
CL5955.Contig2_All	317.351	795.002	142.497	329.083	2.4069	1.8766	424.563	365.038	229.727	353.782	279.6	1e-90	abscisic stress ripening-like protein [Glycine max] >gi|38679405|gb|AAR26524.1| abscisic stress ripening-like protein [Glycine max]	gi|571484220|ref|XM_003536376.2|	321	1e-84	PREDICTED: Glycine max POU domain, class 4, transcription factor 1-like (LOC100809999), mRNA	P37219	138	1e-39	ASR2_SOLLC Abscisic stress-ripening protein 2 OS=Solanum lycopersicum GN=ASR2 PE=4 SV=1	XF0818	82.8	2e-16	COG2730	Endoglucanase	K12741	2e-21	97.1	aly:ARALYDRAFT_493936	heterogeneous nuclear ribonucleoprotein A1/A3
CL5958.Contig3_All	7.0091	6.1819	11.0513	8.1759	43.0506	73.964	5.3992	4.1254	7.6747	7.7768	796.2	0	hypothetical protein LR48_Vigan08g113500 [Vigna angularis]	gi|502146806|ref|XM_004506559.1|	424	1e-115	PREDICTED: Cicer arietinum transcription factor SPT20 homolog (LOC101505364), mRNA	P13983	75.9	4e-14	EXTN_TOBAC Extensin OS=Nicotiana tabacum GN=HRGPNT3 PE=2 SV=1	STM0960	65.1	4e-10	COG1674	DNA segregation ATPase FtsK/SpoIIIE and related proteins	K01115	8e-10	62.8	vcn:VOLCADRAFT_99471	phospholipase D [EC:3.1.4.4]
CL5958.Contig4_All	6.4835	4.3437	10.5449	7.833	34.591	60.5311	3.4259	4.0649	7.2547	8.5149	315.1	0	hypothetical protein LR48_Vigan08g113500 [Vigna angularis]	gi|502146806|ref|XM_004506559.1|	418	1e-113	PREDICTED: Cicer arietinum transcription factor SPT20 homolog (LOC101505364), mRNA	P13983	75.9	5e-14	EXTN_TOBAC Extensin OS=Nicotiana tabacum GN=HRGPNT3 PE=2 SV=1	STM0960	62	4e-09	COG1674	DNA segregation ATPase FtsK/SpoIIIE and related proteins	K01115	9e-10	62.8	vcn:VOLCADRAFT_99471	phospholipase D [EC:3.1.4.4]
CL5990.Contig1_All	4.5075	3.2931	0.1414	0.083	0.6228	0.3122	0.1268	0.2548	1.6712	2.1043	480.3	9e-168	PREDICTED: transcription factor MYB46-like [Vigna radiata var. radiata]	gi|571488532|ref|XM_006590903.1|	496	1e-137	PREDICTED: Glycine max transcription factor MYB46-like (LOC100785810), mRNA	Q9LXV2	250	3e-80	MYB46_ARATH Transcription factor MYB46 OS=Arabidopsis thaliana GN=MYB46 PE=2 SV=1	ECU11g1690	114	9e-29	COG5147	Myb superfamily proteins, including transcription factors and mRNA splicing factors	K09422	9e-117	346	vvi:100243210	myb proto-oncogene protein, plant
CL6062.Contig2_All	0.7171	1.2858	1.346	0.9475	0.0948	0.5704	0.5309	0.291	2.1812	3.662	575.5	0	PREDICTED: U-box domain-containing protein 8-like [Vitis vinifera]	gi|571466917|ref|XM_003528374.2|	174	2e-40	PREDICTED: Glycine max U-box domain-containing protein 8-like (LOC100785141), mRNA	O81902	441	9e-152	PUB8_ARATH U-box domain-containing protein 8 OS=Arabidopsis thaliana GN=PUB8 PE=2 SV=1	--	--	--	--	--	K14431	2e-08	58.5	aly:ARALYDRAFT_311885	transcription factor TGA
CL6096.Contig7_All	1.6137	0.9114	1.781	3.7808	0.0747	0.2246	0	0.1528	2.2905	0.9013	32.3	1e-42	hypothetical protein LR48_Vigan03g240700 [Vigna angularis] >gi|965671237|dbj|BAT85844.1| hypothetical protein VIGAN_04343800 [Vigna angularis var. angularis]	gi|357510984|ref|XM_003625733.1|	143	5e-31	Medicago truncatula BZIP transcription factor bZIP39 (MTR_7g104190) mRNA, complete cds	Q99090	48.1	6e-06	CPRF2_PETCR Light-inducible protein CPRF2 OS=Petroselinum crispum GN=CPRF2 PE=2 SV=2	--	--	--	--	--	--	--	--	--	--
CL6134.Contig1_All	0.2158	0.2708	0	0	0	0	1.2199	1.4813	0.0638	0	94.4	6e-68	PREDICTED: transcription factor bHLH113-like isoform X2 [Glycine max] >gi|947041318|gb|KRG91042.1| hypothetical protein GLYMA_20G130200 [Glycine max]	gi|571484707|ref|XM_006589569.1|	248	2e-62	PREDICTED: Glycine max transcription factor bHLH113-like (LOC100809107), mRNA	Q9LT67	137	2e-36	BH113_ARATH Transcription factor bHLH113 OS=Arabidopsis thaliana GN=BHLH113 PE=2 SV=1	--	--	--	--	--	--	--	--	--	--
CL6134.Contig2_All	2.8844	2.8395	0.5351	0	0.0524	0	7.0874	5.6229	0.4683	1.0741	273.5	3e-86	PREDICTED: transcription factor bHLH113-like isoform X2 [Glycine max] >gi|947041318|gb|KRG91042.1| hypothetical protein GLYMA_20G130200 [Glycine max]	gi|571484707|ref|XM_006589569.1|	248	2e-62	PREDICTED: Glycine max transcription factor bHLH113-like (LOC100809107), mRNA	Q9LT67	160	2e-45	BH113_ARATH Transcription factor bHLH113 OS=Arabidopsis thaliana GN=BHLH113 PE=2 SV=1	--	--	--	--	--	--	--	--	--	--
CL6240.Contig4_All	6.7928	4.1793	1.26	0.8212	1.3562	2.2866	1.2549	1.2611	4.4114	3.5709	480.7	8e-167	PREDICTED: uncharacterized protein LOC103335407 [Prunus mume]	gi|470107982|ref|XM_004290267.1|	206	5e-50	PREDICTED: Fragaria vesca subsp. vesca uncharacterized LOC101303079 (LOC101303079), mRNA	Q9ZQ85	218	4e-66	EFM_ARATH Myb family transcription factor EFM OS=Arabidopsis thaliana GN=EFM PE=1 SV=2	--	--	--	--	--	K14491	4e-14	73.6	olu:OSTLU_5500	two-component response regulator ARR-B family
CL6254.Contig1_All	6.5128	6.765	17.8622	6.5542	0.2772	0.0695	6.0659	6.521	45.3377	39.1363	302.4	2e-99	GATA transcription factor 2, putative [Theobroma cacao] >gi|508704453|gb|EOX96349.1| GATA transcription factor 2, putative [Theobroma cacao]	gi|302398808|gb|HM122560.1|	200	3e-48	Malus x domestica GATA domain class transcription factor (GATA9) mRNA, complete cds	O49741	272	8e-90	GATA2_ARATH GATA transcription factor 2 OS=Arabidopsis thaliana GN=GATA2 PE=2 SV=1	YLR013w	50.1	6e-07	COG5641	GATA Zn-finger-containing transcription factor	--	--	--	--	--
CL6254.Contig2_All	5.4833	6.5955	6.0839	7.7008	0	0.0707	6.8168	9.4462	5.2249	5.0193	300.4	1e-98	GATA transcription factor 2, putative [Theobroma cacao] >gi|508704453|gb|EOX96349.1| GATA transcription factor 2, putative [Theobroma cacao]	gi|302398808|gb|HM122560.1|	212	7e-52	Malus x domestica GATA domain class transcription factor (GATA9) mRNA, complete cds	O49741	271	2e-89	GATA2_ARATH GATA transcription factor 2 OS=Arabidopsis thaliana GN=GATA2 PE=2 SV=1	YMR136w	53.9	3e-07	COG5641	GATA Zn-finger-containing transcription factor	--	--	--	--	--
CL6259.Contig3_All	2.4163	3.5045	9.1435	1.854	8.1517	5.2319	0.6071	0.0508	13.4652	8.8773	751.5	0	hypothetical protein PHAVU_008G134400g [Phaseolus vulgaris] >gi|561013832|gb|ESW12693.1| hypothetical protein PHAVU_008G134400g [Phaseolus vulgaris]	gi|571474397|ref|XM_003532204.2|	944	0	PREDICTED: Glycine max U-box domain-containing protein 9-like (LOC100809408), mRNA	Q9SRT0	546	0	PUB9_ARATH U-box domain-containing protein 9 OS=Arabidopsis thaliana GN=PUB9 PE=1 SV=1	--	--	--	--	--	K14431	1e-10	65.9	aly:ARALYDRAFT_311885	transcription factor TGA
CL6266.Contig1_All	58.1809	55.0886	196.191	141.332	18.965	22.8005	30.5005	29.4771	203.445	93.4172	235.7	1e-74	bZIP transcription factor bZIP124 [Glycine max] >gi|113367218|gb|ABI34666.1| bZIP transcription factor bZIP124 [Glycine max] >gi|918463639|gb|ALA09164.1| BZIP transcription factor, partial [Glycine max]	gi|210141371|dbj|AK245290.1|	230	3e-57	Glycine max cDNA, clone: GMFL01-26-E01	O65683	168	1e-50	BZP11_ARATH bZIP transcription factor 11 OS=Arabidopsis thaliana GN=BZIP11 PE=1 SV=1	--	--	--	--	--	K04371	5e-58	200	vvi:100254083	extracellular signal-regulated kinase 1/2 [EC:2.7.11.24]
CL6266.Contig2_All	393.436	361.815	626.533	364.597	228.147	183.942	138.027	137.235	421.069	413.814	238	7e-74	bZIP transcription factor bZIP124 [Glycine max] >gi|113367218|gb|ABI34666.1| bZIP transcription factor bZIP124 [Glycine max] >gi|918463639|gb|ALA09164.1| BZIP transcription factor, partial [Glycine max]	gi|351724634|ref|NM_001251415.1|	244	3e-61	Glycine max bZIP transcription factor bZIP124 (BZIP124), mRNA	O65683	169	9e-50	BZP11_ARATH bZIP transcription factor 11 OS=Arabidopsis thaliana GN=BZIP11 PE=1 SV=1	--	--	--	--	--	K04371	1e-56	201	vvi:100254083	extracellular signal-regulated kinase 1/2 [EC:2.7.11.24]
CL6266.Contig3_All	17.5993	17.2544	50.7343	61.2882	8.3905	7.2196	10.2482	10.0841	42.5293	22.9506	235.7	6e-75	bZIP transcription factor bZIP124 [Glycine max] >gi|113367218|gb|ABI34666.1| bZIP transcription factor bZIP124 [Glycine max] >gi|918463639|gb|ALA09164.1| BZIP transcription factor, partial [Glycine max]	gi|210141371|dbj|AK245290.1|	230	3e-57	Glycine max cDNA, clone: GMFL01-26-E01	O65683	168	7e-51	BZP11_ARATH bZIP transcription factor 11 OS=Arabidopsis thaliana GN=BZIP11 PE=1 SV=1	--	--	--	--	--	K04371	3e-58	200	vvi:100254083	extracellular signal-regulated kinase 1/2 [EC:2.7.11.24]
CL6271.Contig10_All	1.3962	2.1906	2.516	3.0131	0.7386	4.9514	0.7517	0.5666	3.4802	2.7852	531.2	0	NAC family transcription factor 5 [Cicer arietinum]	gi|502135862|ref|XM_004502422.1|	482	1e-133	PREDICTED: Cicer arietinum NAC domain-containing protein 2-like (LOC101510065), mRNA	Q39013	422	3e-145	NAC2_ARATH NAC domain-containing protein 2 OS=Arabidopsis thaliana GN=NAC002 PE=2 SV=2	--	--	--	--	--	--	--	--	--	--
CL6271.Contig12_All	7.7182	22.7096	19.7503	20.2834	6.3248	20.4302	3.9341	3.8337	26.2667	31.166	529.6	0	NAC family transcription factor 5 [Cicer arietinum]	gi|502135862|ref|XM_004502422.1|	484	1e-133	PREDICTED: Cicer arietinum NAC domain-containing protein 2-like (LOC101510065), mRNA	Q39013	433	2e-151	NAC2_ARATH NAC domain-containing protein 2 OS=Arabidopsis thaliana GN=NAC002 PE=2 SV=2	--	--	--	--	--	--	--	--	--	--
CL6271.Contig16_All	3.154	5.3559	6.5819	7.4927	1.2881	4.5625	2.6221	1.9324	6.1449	7.0467	220.3	2e-64	NAC family transcription factor 5 [Cicer arietinum]	gi|210145868|dbj|AK244559.1|	258	2e-65	Glycine max cDNA, clone: GMFL01-06-L20	Q39013	214	4e-64	NAC2_ARATH NAC domain-containing protein 2 OS=Arabidopsis thaliana GN=NAC002 PE=2 SV=2	--	--	--	--	--	--	--	--	--	--
CL6271.Contig17_All	0.5153	1.051	0.8802	1.668	0.2981	1.315	0	0.122	1.6	2.5903	531.6	0	NAC family transcription factor 5 [Cicer arietinum]	gi|359806255|ref|NM_001254029.1|	513	1e-142	Glycine max NAC domain-containing protein 2-like (NAC8), mRNA >gi|187940276|gb|EU661911.1| Glycine max NAC domain protein (NAC8) mRNA, complete cds	Q39013	441	1e-154	NAC2_ARATH NAC domain-containing protein 2 OS=Arabidopsis thaliana GN=NAC002 PE=2 SV=2	--	--	--	--	--	--	--	--	--	--
CL6271.Contig18_All	0.1882	0.7088	0.2638	0.5416	0.1743	0.4076	0	0	0.7422	1.1215	542	0	NAC family transcription factor 5 [Cicer arietinum]	gi|359806255|ref|NM_001254029.1|	505	1e-140	Glycine max NAC domain-containing protein 2-like (NAC8), mRNA >gi|187940276|gb|EU661911.1| Glycine max NAC domain protein (NAC8) mRNA, complete cds	Q39013	429	5e-150	NAC2_ARATH NAC domain-containing protein 2 OS=Arabidopsis thaliana GN=NAC002 PE=2 SV=2	--	--	--	--	--	--	--	--	--	--
CL6271.Contig3_All	0.6218	1.3479	2.436	3.3456	10.7785	27.1177	0	0	1.0029	0.3788	503.8	2e-175	NAC domain class transcription factor isoform 1 [Theobroma cacao] >gi|508720956|gb|EOY12853.1| NAC domain class transcription factor isoform 1 [Theobroma cacao]	gi|351721072|ref|NM_001251292.1|	402	1e-109	Glycine max NAC domain protein (NAC27), mRNA >gi|187940302|gb|EU661924.1| Glycine max NAC domain protein (NAC27) mRNA, complete cds	Q93VY3	346	2e-116	NAC72_ARATH NAC domain-containing protein 72 OS=Arabidopsis thaliana GN=NAC072 PE=2 SV=1	--	--	--	--	--	--	--	--	--	--
CL6271.Contig4_All	8.5883	14.3537	11.6883	15.6072	2.8872	12.6258	5.3663	4.2799	11.8165	16.6126	148.7	7e-38	NAC domain transcription factor [Momordica charantia]	gi|210145868|dbj|AK244559.1|	391	1e-105	Glycine max cDNA, clone: GMFL01-06-L20	Q7F2L3	285	6e-91	NAC48_ORYSJ NAC domain-containing protein 48 OS=Oryza sativa subsp. japonica GN=NAC48 PE=2 SV=1	--	--	--	--	--	--	--	--	--	--
CL6271.Contig5_All	1.1411	5.9676	3.0653	4.8468	0.9976	5.471	0.4778	0.6002	3.5994	9.277	530	0	NAC family transcription factor 5 [Cicer arietinum]	gi|359806255|ref|NM_001254029.1|	490	1e-135	Glycine max NAC domain-containing protein 2-like (NAC8), mRNA >gi|187940276|gb|EU661911.1| Glycine max NAC domain protein (NAC8) mRNA, complete cds	Q39013	437	6e-153	NAC2_ARATH NAC domain-containing protein 2 OS=Arabidopsis thaliana GN=NAC002 PE=2 SV=2	--	--	--	--	--	--	--	--	--	--
CL632.Contig6_All	0.1555	0.4555	0.8501	0.8311	0.0192	0.1828	0	0	0.601	0.4749	184.5	5e-44	PREDICTED: uncharacterized protein LOC100780128 isoform X2 [Glycine max] >gi|947108507|gb|KRH56833.1| hypothetical protein GLYMA_05G022300 [Glycine max]	gi|571453420|ref|XM_006579448.1|	1441	0	PREDICTED: Glycine max uncharacterized LOC100780128 (LOC100780128), transcript variant X2, mRNA	Q7XUN2	120	8e-30	MAD17_ORYSJ MADS-box transcription factor 17 OS=Oryza sativa subsp. japonica GN=MADS17 PE=1 SV=2	YPL089c	68.2	2e-10	COG5068	Regulator of arginine metabolism and related MADS box-containing transcription factors	K09264	2e-29	120	vvi:100232868	MADS-box transcription factor, plant
CL6362.Contig1_All	1.128	4.8492	3.1125	1.3215	0.5221	1.0991	1.2223	1.8691	4.9371	7.6237	110.9	2e-23	PREDICTED: light-inducible protein CPRF2-like [Vigna radiata var. radiata]	gi|351725228|ref|NM_001250156.1|	710	0	Glycine max bZIP transcription factor bZIP89 (BZIP89), mRNA >gi|113367195|gb|DQ787045.1| Glycine max bZIP transcription factor bZIP89 (bZIP89) mRNA, complete cds	Q99090	341	3e-107	CPRF2_PETCR Light-inducible protein CPRF2 OS=Petroselinum crispum GN=CPRF2 PE=2 SV=2	--	--	--	--	--	K04371	6e-13	74.3	vvi:100254083	extracellular signal-regulated kinase 1/2 [EC:2.7.11.24]
CL636.Contig3_All	6.3535	1.8434	3.7252	4.4095	0.0591	0.4148	3.0985	3.3858	2.6059	2.1399	593.6	0	PREDICTED: transcription factor TCP4, partial [Cucumis sativus]	gi|359493802|ref|XM_003634622.1|	204	4e-49	PREDICTED: Vitis vinifera transcription factor TCP4-like (LOC100248756), mRNA	Q8LPR5	380	4e-123	TCP4_ARATH Transcription factor TCP4 OS=Arabidopsis thaliana GN=TCP4 PE=1 SV=1	--	--	--	--	--	--	--	--	--	--
CL6388.Contig1_All	6.2525	7.3815	19.001	28.3216	1.5473	2.6426	31.6723	32.7075	34.417	24.204	390.6	3e-132	hypothetical protein VIGAN_10076000 [Vigna angularis var. angularis]	gi|571434019|ref|XM_003517833.2|	280	5e-72	PREDICTED: Glycine max MYB transcription factor MYB158 (MYB158), mRNA	Q2V9B0	204	5e-62	MY1R1_SOLTU Transcription factor MYB1R1 OS=Solanum tuberosum PE=2 SV=1	--	--	--	--	--	--	--	--	--	--
CL6388.Contig2_All	2.388	3.3882	9.3857	21.3814	1.5378	1.8306	15.2609	13.3699	12.8956	10.7864	273.5	3e-89	PREDICTED: transcription factor MYB1R1 [Vigna radiata var. radiata]	gi|571434019|ref|XM_003517833.2|	212	5e-52	PREDICTED: Glycine max MYB transcription factor MYB158 (MYB158), mRNA	Q2V9B0	164	8e-49	MY1R1_SOLTU Transcription factor MYB1R1 OS=Solanum tuberosum PE=2 SV=1	--	--	--	--	--	--	--	--	--	--
CL6432.Contig1_All	66.7057	21.1257	25.2747	11.1908	16.8733	28.3594	10.2315	9.9881	16.7902	13.5168	242.3	1e-77	PREDICTED: ethylene-responsive transcription factor ERF011-like [Cicer arietinum]	gi|161138203|gb|EF051463.1|	145	1e-31	Glycine soja isolate 4-18 dehydration responsive element-binding protein 1-like gene, complete sequence	Q9SW63	187	8e-58	RA210_ARATH Ethylene-responsive transcription factor RAP2-10 OS=Arabidopsis thaliana GN=RAP2-10 PE=2 SV=1	--	--	--	--	--	K09286	8e-65	206	pop:POPTR_655111	EREBP-like factor
CL6442.Contig5_All	1.188	0.4588	0	0	0	0	1.7221	2.5094	0	0.2042	238.4	6e-77	PREDICTED: uncharacterized protein LOC105798400 isoform X2 [Gossypium raimondii] >gi|763765952|gb|KJB33167.1| hypothetical protein B456_006G037400 [Gossypium raimondii]	gi|571542433|ref|XM_003552111.2|	387	1e-104	PREDICTED: Glycine max transcription factor bHLH35-like (LOC100813030), mRNA	Q9LXA9	60.1	5e-10	BH061_ARATH Transcription factor bHLH61 OS=Arabidopsis thaliana GN=BHLH61 PE=2 SV=1	--	--	--	--	--	--	--	--	--	--
CL6450.Contig4_All	0.9317	2.5893	1.7488	3.1184	0	0	0.627	0.5041	1.8105	2.0815	532.3	0	PREDICTED: myb family transcription factor APL-like isoform X2 [Glycine max] >gi|947064527|gb|KRH13788.1| hypothetical protein GLYMA_15G263700 [Glycine max]	gi|571471730|ref|XM_006585328.1|	783	0	PREDICTED: Glycine max myb family transcription factor APL-like (LOC100793303), transcript variant X2, mRNA	Q9SAK5	370	6e-126	APL_ARATH Myb family transcription factor APL OS=Arabidopsis thaliana GN=APL PE=1 SV=2	--	--	--	--	--	K14491	6e-13	70.1	ppp:PHYPADRAFT_152341	two-component response regulator ARR-B family
CL6468.Contig10_All	6.2696	4.8089	4.6986	7.3733	0.4299	1.4006	15.9167	16.9295	5.9741	9.3382	451.4	6e-154	HMG I/Y like protein [Glycine max] >gi|15706274|emb|CAC69997.1| HMG I/Y like protein [Glycine max]	gi|571465731|ref|XM_006583392.1|	200	4e-48	PREDICTED: Glycine max glutenin, low molecular weight subunit-like (LOC100776248), mRNA	Q9FYS5	121	9e-32	HMGYA_MAIZE HMG-Y-related protein A OS=Zea mays GN=HMGIY2 PE=1 SV=1	YMR043w	52.8	6e-07	COG5068	Regulator of arginine metabolism and related MADS box-containing transcription factors	K11275	2e-31	124	gmx:100775944	histone H1/5
CL6468.Contig11_All	3.1011	2.4613	3.0679	2.5868	0.2111	0	7.9491	7.8587	3.4524	3.5151	100.1	1e-119	HMG I/Y like protein [Glycine max] >gi|15706274|emb|CAC69997.1| HMG I/Y like protein [Glycine max]	gi|571478138|ref|XR_416053.1|	145	2e-31	PREDICTED: Glycine max atrophin-1-like (LOC100788215), misc_RNA	Q9FYS5	121	2e-31	HMGYA_MAIZE HMG-Y-related protein A OS=Zea mays GN=HMGIY2 PE=1 SV=1	YMR043w	63.2	3e-10	COG5068	Regulator of arginine metabolism and related MADS box-containing transcription factors	K11275	6e-31	124	gmx:100775944	histone H1/5
CL6468.Contig1_All	1.5391	1.4635	1.6179	1.7254	0.3454	0.7791	6.3721	7.1542	1.9861	2.2925	441.4	3e-148	HMG I/Y like protein [Glycine max] >gi|15706274|emb|CAC69997.1| HMG I/Y like protein [Glycine max]	gi|571465731|ref|XM_006583392.1|	200	5e-48	PREDICTED: Glycine max glutenin, low molecular weight subunit-like (LOC100776248), mRNA	Q9FYS5	121	2e-31	HMGYA_MAIZE HMG-Y-related protein A OS=Zea mays GN=HMGIY2 PE=1 SV=1	YMR043w	61.2	1e-09	COG5068	Regulator of arginine metabolism and related MADS box-containing transcription factors	K11275	4e-31	124	gmx:100775944	histone H1/5
CL6482.Contig2_All	7.905	8.3654	8.0648	17.9667	0.2152	0.1438	2.1176	1.1007	5.7754	7.2722	308.9	2e-102	homeobox associated leucine zipper protein [Medicago truncatula] >gi|657380787|gb|KEH24864.1| homeobox associated leucine zipper protein [Medicago truncatula]	gi|193237554|dbj|AB378627.1|	248	1e-62	Lotus japonicus HDZ-M48 mRNA for transcription factor Homeobox, complete cds	Q02283	205	1e-63	HAT5_ARATH Homeobox-leucine zipper protein HAT5 OS=Arabidopsis thaliana GN=HAT5 PE=1 SV=1	--	--	--	--	--	K09338	8e-65	209	aly:ARALYDRAFT_477377	homeobox-leucine zipper protein
CL6536.Contig10_All	0.7781	0.3662	0.3578	0.2998	0.045	0.1354	2.3827	1.7498	0.4027	0.5976	316.2	1e-100	PREDICTED: E2F transcription factor-like E2FF isoform X1 [Gossypium raimondii] >gi|763766505|gb|KJB33720.1| hypothetical protein B456_006G027400 [Gossypium raimondii]	gi|590649068|ref|XM_007032251.1|	85.7	2e-13	Theobroma cacao DP-E2F-like 1, putative (TCM_017926) mRNA, complete cds	Q8LSZ4	161	1e-43	E2FE_ARATH E2F transcription factor-like E2FE OS=Arabidopsis thaliana GN=E2FE PE=2 SV=1	--	--	--	--	--	K09391	3e-43	160	gmx:100806151	E2F transcription factor 7/8
CL6583.Contig6_All	0	0	0	0	0	0	5.9509	4.9914	0	0	519.2	1e-180	hypothetical protein PHAVU_009G137400g [Phaseolus vulgaris] >gi|561010654|gb|ESW09561.1| hypothetical protein PHAVU_009G137400g [Phaseolus vulgaris]	gi|571496988|ref|XM_003541581.2|	416	1e-113	PREDICTED: Glycine max transcription factor SPEECHLESS-like (LOC100809717), mRNA	Q700C7	360	1e-119	SPCH_ARATH Transcription factor SPEECHLESS OS=Arabidopsis thaliana GN=SPCH PE=1 SV=1	--	--	--	--	--	K13422	6e-12	70.1	pop:POPTR_836925	transcription factor MYC2
CL6583.Contig7_All	0.2246	0	0	0	0	0.1042	4.4965	5.635	0	0	474.9	4e-164	PREDICTED: transcription factor SPEECHLESS [Jatropha curcas]	gi|571496988|ref|XM_003541581.2|	454	1e-124	PREDICTED: Glycine max transcription factor SPEECHLESS-like (LOC100809717), mRNA	Q700C7	359	2e-120	SPCH_ARATH Transcription factor SPEECHLESS OS=Arabidopsis thaliana GN=SPCH PE=1 SV=1	--	--	--	--	--	K13422	7e-15	79	gmx:100790854	transcription factor MYC2
CL6595.Contig16_All	1.0475	1.1601	0.1295	0	0.1711	0.0572	0	0	0	0	--	--	--	gi|571488567|ref|XM_003537929.2|	61.9	2e-06	PREDICTED: Glycine max transcription factor LUX-like (LOC100802217), transcript variant X1, mRNA	--	--	--	--	--	--	--	--	--	--	--	--	--	--
CL6595.Contig19_All	2.8393	2.8389	0.4047	0.5341	0.1782	0.0447	0.0907	0.1367	0.3416	0.3226	442.2	2e-150	PREDICTED: transcription factor PCL1 [Vitis vinifera] >gi|731392131|ref|XP_010650997.1| PREDICTED: transcription factor PCL1 [Vitis vinifera] >gi|731392133|ref|XP_010650998.1| PREDICTED: transcription factor PCL1 [Vitis vinifera]	gi|359478919|ref|XM_002283123.2|	232	1e-57	PREDICTED: Vitis vinifera uncharacterized LOC100253567 (LOC100253567), mRNA	Q9SNB4	293	3e-94	PCL1_ARATH Transcription factor LUX OS=Arabidopsis thaliana GN=LUX PE=1 SV=1	--	--	--	--	--	K14491	4e-25	111	mtr:MTR_3g106220	two-component response regulator ARR-B family
CL6595.Contig22_All	7.0845	10.811	2.0894	1.8226	1.4154	0.2838	0.5282	0.5308	1.5072	1.9358	443.7	2e-151	PREDICTED: transcription factor PCL1 [Vitis vinifera] >gi|731392131|ref|XP_010650997.1| PREDICTED: transcription factor PCL1 [Vitis vinifera] >gi|731392133|ref|XP_010650998.1| PREDICTED: transcription factor PCL1 [Vitis vinifera]	gi|359478919|ref|XM_002283123.2|	232	1e-57	PREDICTED: Vitis vinifera uncharacterized LOC100253567 (LOC100253567), mRNA	Q9SNB4	294	6e-95	PCL1_ARATH Transcription factor LUX OS=Arabidopsis thaliana GN=LUX PE=1 SV=1	--	--	--	--	--	K14491	4e-25	111	mtr:MTR_3g106220	two-component response regulator ARR-B family
CL6595.Contig2_All	3.1934	3.0198	0.6897	0.1618	1.7413	0.8119	0.2061	0.0828	0.207	0.1466	486.9	1e-166	PREDICTED: transcription factor PCL1-like [Cucumis melo] >gi|659115237|ref|XP_008457455.1| PREDICTED: transcription factor PCL1-like [Cucumis melo]	gi|359478919|ref|XM_002283123.2|	151	4e-33	PREDICTED: Vitis vinifera uncharacterized LOC100253567 (LOC100253567), mRNA	Q9SNB4	298	2e-95	PCL1_ARATH Transcription factor LUX OS=Arabidopsis thaliana GN=LUX PE=1 SV=1	--	--	--	--	--	K14491	8e-26	114	mtr:MTR_3g106220	two-component response regulator ARR-B family
CL6595.Contig6_All	1.4952	0.9592	0.3842	0.0819	0.1538	0.1542	0.0313	0	0	0.0371	490	8e-165	PREDICTED: transcription factor PCL1-like [Cucumis melo] >gi|659115237|ref|XP_008457455.1| PREDICTED: transcription factor PCL1-like [Cucumis melo]	gi|359478919|ref|XM_002283123.2|	159	2e-35	PREDICTED: Vitis vinifera uncharacterized LOC100253567 (LOC100253567), mRNA	Q9SNB4	301	1e-94	PCL1_ARATH Transcription factor LUX OS=Arabidopsis thaliana GN=LUX PE=1 SV=1	--	--	--	--	--	K14491	1e-25	114	mtr:MTR_3g106220	two-component response regulator ARR-B family
CL6605.Contig1_All	1.7905	0.7866	0.4705	0	0.2486	0.1662	4.9768	7.2053	0.2118	1.0001	188.3	1e-57	PREDICTED: chromatin accessibility complex protein 1 [Vitis vinifera]	gi|571490319|ref|XM_003537488.2|	139	8e-30	PREDICTED: Glycine max dr1-associated corepressor-like (LOC100790556), mRNA	Q9SMP0	55.1	1e-08	NFYC1_ARATH Nuclear transcription factor Y subunit C-1 OS=Arabidopsis thaliana GN=NFYC1 PE=1 SV=1	YOR358w	49.3	3e-06	COG5208	CCAAT-binding factor, subunit C	K03004	2e-24	100	sbi:SORBI_03g003610	DNA-directed RNA polymerase I subunit RPA43
CL6605.Contig2_All	2.2927	1.7053	1.2496	0.1047	1.1005	0.0788	6.6406	9.3265	0.1004	1.4228	188.3	3e-57	PREDICTED: chromatin accessibility complex protein 1 [Vitis vinifera]	gi|571490319|ref|XM_003537488.2|	139	8e-30	PREDICTED: Glycine max dr1-associated corepressor-like (LOC100790556), mRNA	Q9SMP0	55.1	1e-08	NFYC1_ARATH Nuclear transcription factor Y subunit C-1 OS=Arabidopsis thaliana GN=NFYC1 PE=1 SV=1	YOR358w	49.3	4e-06	COG5208	CCAAT-binding factor, subunit C	K03004	2e-24	100	sbi:SORBI_03g003610	DNA-directed RNA polymerase I subunit RPA43
CL6614.Contig2_All	0.1014	0	0.0533	0	1.2206	1.506	0	0	0.06	0	95.5	1e-107	PREDICTED: transcription factor LAF1-like [Vigna radiata var. radiata]	gi|292683099|dbj|AK339651.1|	345	1e-91	Lotus japonicus cDNA, clone: LjFL3-045-BB03, HTC	Q9FDW1	95.9	3e-28	MYB44_ARATH Transcription factor MYB44 OS=Arabidopsis thaliana GN=MYB44 PE=2 SV=1	ECU11g1690	89	1e-23	COG5147	Myb superfamily proteins, including transcription factors and mRNA splicing factors	K09422	2e-56	161	zma:100382901	myb proto-oncogene protein, plant
CL6614.Contig3_All	0.0464	0.1166	0.0488	0	1.1605	1.5511	0	0	0	0	323.6	3e-104	hypothetical protein PHAVU_009G1337001g, partial [Phaseolus vulgaris] >gi|561010603|gb|ESW09510.1| hypothetical protein PHAVU_009G1337001g, partial [Phaseolus vulgaris]	gi|292683099|dbj|AK339651.1|	293	4e-76	Lotus japonicus cDNA, clone: LjFL3-045-BB03, HTC	Q9FDW1	95.1	3e-21	MYB44_ARATH Transcription factor MYB44 OS=Arabidopsis thaliana GN=MYB44 PE=2 SV=1	ECU11g1690	91.7	2e-20	COG5147	Myb superfamily proteins, including transcription factors and mRNA splicing factors	K09422	2e-44	161	zma:100382901	myb proto-oncogene protein, plant
CL6614.Contig4_All	0.3582	0.6422	0.0538	0.0631	7.3887	14.1016	0	0	0.3026	0.1143	409.5	1e-137	PREDICTED: transcription factor LAF1-like [Vigna radiata var. radiata]	gi|292683099|dbj|AK339651.1|	418	1e-113	Lotus japonicus cDNA, clone: LjFL3-045-BB03, HTC	Q9FDW1	137	6e-36	MYB44_ARATH Transcription factor MYB44 OS=Arabidopsis thaliana GN=MYB44 PE=2 SV=1	ECU11g1690	124	7e-32	COG5147	Myb superfamily proteins, including transcription factors and mRNA splicing factors	K09422	6e-72	233	zma:100382901	myb proto-oncogene protein, plant
CL6643.Contig1_All	5.5787	2.5462	2.5201	2.5016	0.2561	0.0428	8.7315	8.9055	3.2722	2.8327	414.5	4e-138	Transcription factor MYB44 [Glycine soja]	gi|571556499|ref|XM_003553307.2|	313	5e-82	PREDICTED: Glycine max myb-like protein Q-like (LOC100791795), mRNA	Q9FDW1	139	2e-36	MYB44_ARATH Transcription factor MYB44 OS=Arabidopsis thaliana GN=MYB44 PE=2 SV=1	ECU11g1690	112	2e-27	COG5147	Myb superfamily proteins, including transcription factors and mRNA splicing factors	K09422	2e-139	414	pop:POPTR_571286	myb proto-oncogene protein, plant
CL6643.Contig4_All	8.0356	15.4791	10.2533	13.7772	0.8751	0.319	0.2429	0.0814	7.7261	7.7764	352.1	3e-113	Transcription factor MYB44 [Glycine soja]	gi|571443762|ref|XM_006576240.1|	157	7e-35	PREDICTED: Glycine max myb-like protein AA-like (LOC100776882), mRNA	Q9FDW1	130	3e-33	MYB44_ARATH Transcription factor MYB44 OS=Arabidopsis thaliana GN=MYB44 PE=2 SV=1	ECU11g1690	115	8e-29	COG5147	Myb superfamily proteins, including transcription factors and mRNA splicing factors	K09422	6e-114	350	pop:POPTR_571286	myb proto-oncogene protein, plant
CL6643.Contig5_All	7.4669	16.3727	12.1514	12.4249	0.5829	0.2087	0	0.3407	6.8106	8.1402	364.8	2e-118	hypothetical protein POPTR_0013s06320g [Populus trichocarpa] >gi|222858108|gb|EEE95655.1| hypothetical protein POPTR_0013s06320g [Populus trichocarpa]	gi|571443762|ref|XM_006576240.1|	157	7e-35	PREDICTED: Glycine max myb-like protein AA-like (LOC100776882), mRNA	Q9FDW1	130	3e-33	MYB44_ARATH Transcription factor MYB44 OS=Arabidopsis thaliana GN=MYB44 PE=2 SV=1	ECU11g1690	115	7e-29	COG5147	Myb superfamily proteins, including transcription factors and mRNA splicing factors	K09422	5e-120	364	pop:POPTR_571286	myb proto-oncogene protein, plant
CL6760.Contig1_All	101.552	85.2734	79.631	104.503	119.693	159.098	27.5572	31.2084	101.94	74.585	224.9	8e-70	nuclear transcription factor Y protein [Medicago truncatula] >gi|388523221|gb|AFK49663.1| nuclear transcription factor Y subunit B13 [Medicago truncatula] >gi|657397180|gb|KEH36990.1| nuclear transcription factor Y protein [Medicago truncatula]	gi|351726199|ref|NM_001251469.1|	278	2e-71	Glycine max uncharacterized LOC100305641 (LOC100305641), mRNA	O23310	202	4e-63	NFYB3_ARATH Nuclear transcription factor Y subunit B-3 OS=Arabidopsis thaliana GN=NFYB3 PE=2 SV=1	SPAC23C11.08	132	1e-36	COG2036	Histones H3 and H4	K08065	5e-59	193	gmx:100813169	nuclear transcription Y subunit beta
CL6760.Contig4_All	11.0459	19.2363	5.6602	5.193	1.2142	3.0751	7.2202	8.9553	18.9457	18.663	297	6e-98	PREDICTED: nuclear transcription factor Y subunit B-3-like [Vigna radiata var. radiata]	gi|292683138|dbj|AK339690.1|	361	1e-96	Lotus japonicus cDNA, clone: LjFL3-055-AA03, HTC	Q9FGJ3	244	2e-79	NFYB2_ARATH Nuclear transcription factor Y subunit B-2 OS=Arabidopsis thaliana GN=NFYB2 PE=2 SV=1	YBL021c	140	2e-39	COG2036	Histones H3 and H4	K08065	6e-96	287	gmx:100813169	nuclear transcription Y subunit beta
CL6769.Contig1_All	3.6258	4.9409	0.7622	1.5329	0.0959	0.0961	0.2928	0.2943	0.1225	1.7358	340.5	4e-114	PREDICTED: uncharacterized protein LOC106771329 isoform X1 [Vigna radiata var. radiata]	gi|571477261|ref|XM_006587153.1|	470	1e-129	PREDICTED: Glycine max protein PHR1-LIKE 1-like (LOC102668541), transcript variant X2, mRNA	Q0WVU3	216	3e-68	PHL5_ARATH Myb family transcription factor PHL5 OS=Arabidopsis thaliana GN=PHL5 PE=2 SV=1	--	--	--	--	--	K14491	4e-11	64.7	sbi:SORBI_08g006300	two-component response regulator ARR-B family
CL677.Contig1_All	0.9115	0.0424	0	0	0	0.0313	7.2526	7.8317	0	0.0377	518.9	1e-174	hypothetical protein PHAVU_002G170500g [Phaseolus vulgaris] >gi|561032062|gb|ESW30641.1| hypothetical protein PHAVU_002G170500g [Phaseolus vulgaris]	gi|502143652|ref|XM_004505358.1|	458	1e-125	PREDICTED: Cicer arietinum myb-like protein A-like (LOC101510727), mRNA	Q9FDW1	137	1e-35	MYB44_ARATH Transcription factor MYB44 OS=Arabidopsis thaliana GN=MYB44 PE=2 SV=1	ECU11g1690	115	1e-28	COG5147	Myb superfamily proteins, including transcription factors and mRNA splicing factors	K09422	6e-170	503	vvi:100253313	myb proto-oncogene protein, plant
CL6800.Contig1_All	15.3543	14.3097	14.2844	23.5041	30.8446	20.308	8.148	8.1213	16.4922	14.5496	832	0	PREDICTED: transcription factor IWS1 [Glycine max] >gi|947090941|gb|KRH39606.1| hypothetical protein GLYMA_09G209100 [Glycine max]	gi|571433601|ref|XM_003516869.2|	1146	0	PREDICTED: Glycine max protein IWS1 homolog (LOC100812819), transcript variant 1, mRNA	--	--	--	--	SPBC19G7.16	118	1e-27	COG5139	Uncharacterized conserved protein	K14306	8e-07	54.3	rcu:RCOM_1609340	nuclear pore complex protein Nup62
CL6800.Contig6_All	5.8458	5.0202	3.8405	5.9282	8.6512	7.5304	3.1526	3.2773	4.8677	3.8666	332	0	PREDICTED: transcription factor IWS1 [Glycine max] >gi|947090941|gb|KRH39606.1| hypothetical protein GLYMA_09G209100 [Glycine max]	gi|571478609|ref|XM_003534247.2|	618	1e-174	PREDICTED: Glycine max protein IWS1 homolog (LOC100801805), mRNA	--	--	--	--	ECU08g0440	82	4e-17	COG5139	Uncharacterized conserved protein	K14306	7e-07	54.3	rcu:RCOM_1609340	nuclear pore complex protein Nup62
CL6821.Contig1_All	0.5205	3.9198	2.7356	2.3534	0.1606	3.7836	0.8174	0.2464	3.4889	3.9732	306.2	2e-100	Heat stress transcription factor A-2c, putative [Theobroma cacao] >gi|508722677|gb|EOY14574.1| Heat stress transcription factor A-2c, putative [Theobroma cacao]	gi|571458803|ref|XM_003528193.2|	71.9	2e-09	PREDICTED: Glycine max uncharacterized LOC100526861 (LOC100526861), mRNA	--	--	--	--	--	--	--	--	--	--	--	--	--	--
CL6821.Contig3_All	1.9255	3.976	6.2026	2.2979	2.0125	7.1474	9.5395	8.3514	4.9962	2.0816	348.6	8e-115	Heat stress transcription factor A-2c, putative [Theobroma cacao] >gi|508722677|gb|EOY14574.1| Heat stress transcription factor A-2c, putative [Theobroma cacao]	gi|530705063|gb|KF321733.1|	67.9	3e-08	Nicotiana attenuata herbivore elicitor-regulated 1 (HER1) mRNA, complete cds	--	--	--	--	--	--	--	--	--	--	--	--	--	--
CL6870.Contig3_All	1.0904	9.6057	0.2759	0.3237	0.0187	0	1.3128	1.5487	0.0478	1.8271	168.3	4e-43	PREDICTED: heat stress transcription factor A-7a-like [Vigna radiata var. radiata]	gi|31581060|dbj|AP006429.1|	321	4e-84	Lotus japonicus genomic DNA, chromosome 1, clone: LjT17D07, TM0322, complete sequence	Q9LUH8	236	2e-68	HFA6B_ARATH Heat stress transcription factor A-6b OS=Arabidopsis thaliana GN=HSFA6b PE=2 SV=1	SPAC8C9.14_1	69.7	1e-11	COG5169	Heat shock transcription factor	--	--	--	--	--
CL6870.Contig5_All	0.6389	3.4546	0	0.1818	0	0	0.4631	0.6748	0	0.6588	558.1	0	PREDICTED: heat stress transcription factor A-7a-like [Vigna radiata var. radiata]	gi|502115282|ref|XR_189627.1|	365	3e-97	PREDICTED: Cicer arietinum heat stress transcription factor A-7a-like (LOC101493622), transcript variant X6, misc_RNA	Q9LUH8	364	1e-114	HFA6B_ARATH Heat stress transcription factor A-6b OS=Arabidopsis thaliana GN=HSFA6b PE=2 SV=1	SPAC8C9.14_1	99	3e-21	COG5169	Heat shock transcription factor	--	--	--	--	--
CL7030.Contig10_All	1.8761	3.2412	3.2016	1.4969	0.3678	0.5325	0.9774	0.8568	3.394	4.8078	803.5	0	hypothetical protein CICLE_v10028062mg [Citrus clementina] >gi|557525448|gb|ESR36754.1| hypothetical protein CICLE_v10028062mg [Citrus clementina]	gi|568834623|ref|XM_006471358.1|	460	1e-126	PREDICTED: Citrus sinensis dentin sialophosphoprotein-like (LOC102624958), mRNA	Q04088	149	2e-38	POF21_ARATH Probable transcription factor PosF21 OS=Arabidopsis thaliana GN=POSF21 PE=2 SV=1	--	--	--	--	--	K09060	2e-07	55.8	mtr:MTR_8g077950	plant G-box-binding factor
CL7030.Contig12_All	0	2.0274	1.2128	2.2764	0.2136	0.6424	0	0	1.3648	9.7954	91.7	1e-45	PREDICTED: probable transcription factor PosF21 [Cicer arietinum]	gi|571491930|ref|XM_006592017.1|	155	5e-35	PREDICTED: Glycine max bZIP transcription factor bZIP21 (BZIP21), mRNA	Q69IL4	83.2	1e-21	RF2A_ORYSJ Transcription factor RF2a OS=Oryza sativa subsp. japonica GN=RF2a PE=1 SV=1	--	--	--	--	--	K14432	1e-06	47.4	rcu:RCOM_1778810	ABA responsive element binding factor
CL7030.Contig1_All	1.3195	3.2334	2.9721	0.9814	0.2714	0.5831	0.592	0.6941	2.6261	4.071	803.5	0	hypothetical protein CICLE_v10028062mg [Citrus clementina] >gi|557525448|gb|ESR36754.1| hypothetical protein CICLE_v10028062mg [Citrus clementina]	gi|568834623|ref|XM_006471358.1|	452	1e-123	PREDICTED: Citrus sinensis dentin sialophosphoprotein-like (LOC102624958), mRNA	Q04088	149	3e-38	POF21_ARATH Probable transcription factor PosF21 OS=Arabidopsis thaliana GN=POSF21 PE=2 SV=1	--	--	--	--	--	K09060	3e-07	55.8	mtr:MTR_8g077950	plant G-box-binding factor
CL7030.Contig3_All	0.5432	1.3392	2.5285	1.2439	0.0359	0.126	0.4935	0.6429	1.3309	2.4488	800.8	0	hypothetical protein CICLE_v10028062mg [Citrus clementina] >gi|557525448|gb|ESR36754.1| hypothetical protein CICLE_v10028062mg [Citrus clementina]	gi|590685081|ref|XM_007041944.1|	410	1e-111	Theobroma cacao Basic-leucine zipper transcription factor family protein isoform 1 (TCM_006766) mRNA, complete cds	Q04088	149	3e-38	POF21_ARATH Probable transcription factor PosF21 OS=Arabidopsis thaliana GN=POSF21 PE=2 SV=1	--	--	--	--	--	K09060	3e-08	58.9	mtr:MTR_8g077950	plant G-box-binding factor
CL7030.Contig4_All	0.353	0.6893	1.6287	0.7014	0.0363	0.091	0.2033	0.26	0.8584	1.3584	801.6	0	hypothetical protein CICLE_v10028062mg [Citrus clementina] >gi|557525448|gb|ESR36754.1| hypothetical protein CICLE_v10028062mg [Citrus clementina]	gi|590685081|ref|XM_007041944.1|	410	1e-111	Theobroma cacao Basic-leucine zipper transcription factor family protein isoform 1 (TCM_006766) mRNA, complete cds	Q04088	149	3e-38	POF21_ARATH Probable transcription factor PosF21 OS=Arabidopsis thaliana GN=POSF21 PE=2 SV=1	--	--	--	--	--	K09060	3e-08	58.9	mtr:MTR_8g077950	plant G-box-binding factor
CL7030.Contig8_All	0.1458	0.6276	0.3942	0.334	0.2314	0.1934	0.0785	0.0986	0.5669	0.7448	803.5	0	hypothetical protein CICLE_v10028062mg [Citrus clementina] >gi|557525448|gb|ESR36754.1| hypothetical protein CICLE_v10028062mg [Citrus clementina]	gi|568834623|ref|XM_006471358.1|	452	1e-123	PREDICTED: Citrus sinensis dentin sialophosphoprotein-like (LOC102624958), mRNA	Q04088	149	3e-38	POF21_ARATH Probable transcription factor PosF21 OS=Arabidopsis thaliana GN=POSF21 PE=2 SV=1	--	--	--	--	--	K09060	3e-07	55.8	mtr:MTR_8g077950	plant G-box-binding factor
CL7030.Contig9_All	0.2031	1.1218	1.0676	0.2254	0.2068	0.1508	0.0766	0.1539	1.4897	1.9741	768.5	0	Basic-leucine zipper transcription factor family protein isoform 2 [Theobroma cacao] >gi|508705942|gb|EOX97838.1| Basic-leucine zipper transcription factor family protein isoform 2 [Theobroma cacao]	gi|590685088|ref|XM_007041946.1|	367	8e-98	Theobroma cacao Basic-leucine zipper transcription factor family protein isoform 3 (TCM_006766) mRNA, complete cds	Q04088	113	4e-31	POF21_ARATH Probable transcription factor PosF21 OS=Arabidopsis thaliana GN=POSF21 PE=2 SV=1	--	--	--	--	--	K14432	8e-06	51.2	osa:4327590	ABA responsive element binding factor
CL7049.Contig1_All	1.4887	0.5339	1.1178	0.4808	0	0	0.2672	0.1342	1.7191	1.5839	1236.9	0	PREDICTED: subtilisin-like protease SBT1.7 [Cicer arietinum]	gi|502132795|ref|XM_004501475.1|	648	0	PREDICTED: Cicer arietinum subtilisin-like protease-like (LOC101504506), mRNA	O65351	986	0	SBT17_ARATH Subtilisin-like protease SBT1.7 OS=Arabidopsis thaliana GN=SBT1.7 PE=1 SV=1	BS_vpr	134	2e-31	COG1404	Subtilisin-like serine proteases	K08653	2e-06	52.8	olu:OSTLU_40456	membrane-bound transcription factor site-1 protease [EC:3.4.21.112]
CL7049.Contig6_All	3.6295	2.8419	2.3101	1.9299	0.0308	0.0927	0.5334	0.4729	2.9541	3.3105	1236.1	0	PREDICTED: subtilisin-like protease SBT1.7 [Cicer arietinum]	gi|502132795|ref|XM_004501475.1|	656	0	PREDICTED: Cicer arietinum subtilisin-like protease-like (LOC101504506), mRNA	O65351	983	0	SBT17_ARATH Subtilisin-like protease SBT1.7 OS=Arabidopsis thaliana GN=SBT1.7 PE=1 SV=1	BS_vpr	135	8e-32	COG1404	Subtilisin-like serine proteases	K08653	2e-06	53.5	olu:OSTLU_40456	membrane-bound transcription factor site-1 protease [EC:3.4.21.112]
CL7086.Contig4_All	0.2285	0.5735	0.9606	0.2817	0	0.1413	0	0	1.1711	0.8507	369.8	5e-126	PREDICTED: transcription factor MYB59 [Vitis vinifera]	gi|571513988|ref|XM_006596931.1|	353	3e-94	PREDICTED: Glycine max transcription factor MYB48-like (LOC100775900), transcript variant X1, mRNA	Q9LX82	300	6e-101	MYB48_ARATH Transcription factor MYB48 OS=Arabidopsis thaliana GN=MYB48 PE=2 SV=1	ECU11g1690	114	3e-29	COG5147	Myb superfamily proteins, including transcription factors and mRNA splicing factors	K09422	2e-130	376	vvi:100260318	myb proto-oncogene protein, plant
CL7097.Contig4_All	2.4131	0.9255	1.9729	2.3971	0.1241	0.3732	3.6631	3.8716	0.8722	1.3478	367.5	1e-124	PREDICTED: transcription factor ILR3-like [Prunus mume]	gi|359497013|ref|XM_002273148.2|	242	1e-60	PREDICTED: Vitis vinifera transcription factor ILR3-like (LOC100245935), mRNA	Q9FH37	265	6e-87	ILR3_ARATH Transcription factor ILR3 OS=Arabidopsis thaliana GN=ILR3 PE=1 SV=1	--	--	--	--	--	K13422	2e-06	52	vvi:100250607	transcription factor MYC2
CL7137.Contig2_All	1.7708	6.876	8.9577	11.8734	0.6659	1.9	0.5735	0.9955	5.8911	9.7669	580.9	0	MYB transcription factor [Phaseolus vulgaris]	gi|543176667|gb|KF033367.1|	684	0	Phaseolus vulgaris clone BE2334 MYB transcription factor mRNA, complete cds	Q2V9B0	159	2e-44	MY1R1_SOLTU Transcription factor MYB1R1 OS=Solanum tuberosum PE=2 SV=1	--	--	--	--	--	--	--	--	--	--
CL7137.Contig3_All	2.8104	6.8473	9.5574	14.2701	3.6218	6.9546	1.2461	1.774	7.2354	9.2952	573.9	0	MYB transcription factor [Phaseolus vulgaris]	gi|543176667|gb|KF033367.1|	420	1e-114	Phaseolus vulgaris clone BE2334 MYB transcription factor mRNA, complete cds	Q2V9B0	169	3e-48	MY1R1_SOLTU Transcription factor MYB1R1 OS=Solanum tuberosum PE=2 SV=1	--	--	--	--	--	--	--	--	--	--
CL7137.Contig4_All	0.3521	1.2578	1.3096	1.6031	0.1755	0.4021	0.2041	0.1539	1.762	2.0573	142.1	1e-34	hypothetical protein PHAVU_003G222900g [Phaseolus vulgaris] >gi|561029044|gb|ESW27684.1| hypothetical protein PHAVU_003G222900g [Phaseolus vulgaris]	gi|543176667|gb|KF033367.1|	289	1e-74	Phaseolus vulgaris clone BE2334 MYB transcription factor mRNA, complete cds	Q2V9B0	125	2e-31	MY1R1_SOLTU Transcription factor MYB1R1 OS=Solanum tuberosum PE=2 SV=1	--	--	--	--	--	--	--	--	--	--
CL7137.Contig5_All	0.1306	0.6011	0.8695	0.3221	0.1209	0.1212	0	0	0.4635	1.3618	262.7	1e-79	hypothetical protein VIGAN_01374800 [Vigna angularis var. angularis]	gi|543176667|gb|KF033367.1|	420	1e-114	Phaseolus vulgaris clone BE2334 MYB transcription factor mRNA, complete cds	Q2V9B0	162	7e-45	MY1R1_SOLTU Transcription factor MYB1R1 OS=Solanum tuberosum PE=2 SV=1	--	--	--	--	--	--	--	--	--	--
CL7137.Contig6_All	1.5983	5.0152	3.9001	2.2525	0.9511	1.2183	1.1832	1.7295	7.0223	7.0142	52.8	1e-06	hypothetical protein LR48_Vigan01g211100 [Vigna angularis]	gi|571532362|ref|XM_006600188.1|	87.7	4e-14	PREDICTED: Glycine max MYB transcription factor MYB180 (MYB180), transcript variant X1, mRNA	--	--	--	--	--	--	--	--	--	--	--	--	--	--
CL7137.Contig7_All	106.069	116.17	73.1539	127.101	51.868	41.8607	51.501	44.9244	102.813	111.281	595.1	0	MYB transcription factor [Phaseolus vulgaris]	gi|543176667|gb|KF033367.1|	680	0	Phaseolus vulgaris clone BE2334 MYB transcription factor mRNA, complete cds	Q2V9B0	169	9e-48	MY1R1_SOLTU Transcription factor MYB1R1 OS=Solanum tuberosum PE=2 SV=1	--	--	--	--	--	--	--	--	--	--
CL7143.Contig3_All	0	0	0	0	1.5178	0.8055	0	0	0	0.1077	288.9	1e-95	AP2 domain class transcription factor [Medicago truncatula] >gi|355491795|gb|AES72998.1| AP2 domain class transcription factor [Medicago truncatula]	gi|571453008|ref|XM_003522404.2|	228	1e-56	PREDICTED: Glycine max ethylene-responsive transcription factor ERF114-like (LOC100798671), mRNA	Q9LY29	195	7e-61	EF115_ARATH Ethylene-responsive transcription factor ERF115 OS=Arabidopsis thaliana GN=ERF115 PE=1 SV=1	--	--	--	--	--	K09286	1e-33	123	ath:AT1G43160	EREBP-like factor
CL7198.Contig1_All	2.3339	0.279	0.0584	0	0	0.3094	2.8274	3.2622	0.7888	0.8691	442.2	1e-151	PREDICTED: transcription factor bHLH71-like [Vigna radiata var. radiata]	gi|402794108|ref|NM_001255693.2|	432	1e-118	Glycine max transcription factor bHLH71-like (LOC100783542), mRNA	Q56XR0	242	2e-75	BH071_ARATH Transcription factor bHLH71 OS=Arabidopsis thaliana GN=BHLH71 PE=1 SV=1	--	--	--	--	--	K13422	1e-13	75.1	ppp:PHYPADRAFT_164647	transcription factor MYC2
CL7198.Contig2_All	4.2423	0.8874	0	0	0.238	0.4175	3.876	4.8688	0.8364	0.359	466.1	3e-162	PREDICTED: transcription factor bHLH71-like [Vigna radiata var. radiata]	gi|571473315|ref|XM_003531911.2|	490	1e-135	PREDICTED: Glycine max transcription factor bHLH71-like (LOC100784115), transcript variant X1, mRNA	Q56XR0	266	1e-85	BH071_ARATH Transcription factor bHLH71 OS=Arabidopsis thaliana GN=BHLH71 PE=1 SV=1	--	--	--	--	--	K13422	2e-14	77	ppp:PHYPADRAFT_164647	transcription factor MYC2
CL7222.Contig1_All	28.5506	29.9982	11.9307	20.4088	19.0235	29.6031	4.1929	4.6396	22.7119	22.0629	524.6	0	hypothetical protein PHAVU_007G102900g [Phaseolus vulgaris] >gi|561016992|gb|ESW15796.1| hypothetical protein PHAVU_007G102900g [Phaseolus vulgaris]	gi|571568732|ref|XM_003556218.2|	224	3e-55	PREDICTED: Glycine max uncharacterized LOC100789537 (LOC100789537), mRNA	Q9ZQ85	189	2e-53	EFM_ARATH Myb family transcription factor EFM OS=Arabidopsis thaliana GN=EFM PE=1 SV=2	--	--	--	--	--	K14491	9e-17	85.5	gmx:100776075	two-component response regulator ARR-B family
CL7239.Contig1_All	3.2716	3.6695	10.6095	12.6182	80.0953	61.9474	0	0	8.8104	3.888	326.6	9e-109	hypothetical protein VIGAN_02164300 [Vigna angularis var. angularis]	gi|571448301|ref|XM_006577715.1|	305	7e-80	PREDICTED: Glycine max uncharacterized LOC100499926 (LOC100499926), transcript variant X1, mRNA	Q9M276	167	4e-49	ATB12_ARATH Homeobox-leucine zipper protein ATHB-12 OS=Arabidopsis thaliana GN=ATHB-12 PE=1 SV=1	ECU03g1170	51.6	7e-07	COG5576	Homeodomain-containing transcription factor	K09338	1e-48	167	ath:AT3G61890	homeobox-leucine zipper protein
CL7248.Contig2_All	1.1222	1.1151	1.3271	0.0577	0.0866	0.1736	2.2909	2.1694	0.3872	1.2536	490.7	6e-168	PREDICTED: transcription factor RF2b-like [Glycine max] >gi|947081693|gb|KRH30482.1| hypothetical protein GLYMA_11G186700 [Glycine max]	gi|292782878|dbj|AK338244.1|	500	1e-138	Lotus japonicus cDNA, clone: LjFL2-015-BG04, HTC	Q6S4P4	282	1e-89	RF2B_ORYSJ Transcription factor RF2b OS=Oryza sativa subsp. japonica GN=RF2b PE=1 SV=2	--	--	--	--	--	K09060	6e-08	56.6	vvi:100258205	plant G-box-binding factor
[truncated: 454 more rows]
