# Supplementary material for: Phenotypic and RNA-seq profiles identified key pathways and genes involved in gleditsioside biosynthesis in Gleditsia sinensis Lam
Source: Research Square preprint supplement (doi:10.21203/rs.3.rs-3021898/v1), 2023-06-16
Supplement: Supplementary file 8 [file a816923d48ab54bde8b4e6b5.docx]

**Supplementary Table 8** Classification of TFs in GO enrichment from *Gleditisia Sinensis* pods

| **Gene name** | **Transcripton factor definition** |
| --- | --- |
| DOF | DNA binding with one finger |
| NAC | NAM-ATAF1/2-CUC1/2 |
| AGL | Agamous-like MADS-box protein |
| ARF | Auxin response factor |
| bHLH | basic helix-loop-helix protein |
| bZIP | basic leucine-zipper |
| COL | Zinc finger protein CONSTANS-LIKE |
| EIN3 | ethylene-insensitive protein 3 |
| ERF | ethylene-responsive transcription factor |
| GATA | GATA transcription factor |
| GRAS | GAI-RGA-SCR |
| HD-ZIP | homeodomain-leucine zipper protein |
| HMGB | High mobility group B protein |
| HSFA5 | Heat stress transcription factor A-5 |
| LHY | LATE ELONGATED HYPOCOTYL |
| MYB | MYB transcription factor |
| NFXL1 | NF-X1-type zinc finger protein |
| RRM | RNA-binding proteins |
| SCL28 | Scarecrow-like protein 28 |
| SEP1 | developmental protein SEPALLATA 1 |
| SSGP | Sulfated surface glycoprotein |
| WRKY | WRKYGQK |
