# Supplementary material for: Phenotypic and RNA-seq profiles identified key pathways and genes involved in gleditsioside biosynthesis in Gleditsia sinensis Lam
Source: Research Square preprint supplement (doi:10.21203/rs.3.rs-3021898/v1), 2023-06-16
Supplement: Supplementary file 9 [file d31f130ce8db2a2616dc7f63.xlsx]

## Sheet: Sheet1
Supplementary Table 2 GO classification of blasted unigenes in Gleditsia sinensis pods
Ontology	Class	unigene numbers
molecular_function	catalytic activity	47548
molecular_function	binding	43709
molecular_function	transporter activity	6039
molecular_function	structural molecule activity	2311
molecular_function	nucleic acid binding transcription factor activity	2228
molecular_function	signal transducer activity	1354
molecular_function	molecular function regulator	1204
molecular_function	molecular transducer activity	811
molecular_function	transcription factor activity, protein binding	585
molecular_function	electron carrier activity	428
molecular_function	antioxidant activity	418
molecular_function	nutrient reservoir activity	46
molecular_function	metallochaperone activity	17
molecular_function	protein tag	16
molecular_function	translation regulator activity	1
cellular_component	cell	43604
cellular_component	cell part	43249
cellular_component	membrane	35611
cellular_component	organelle	28998
cellular_component	membrane part	27508
cellular_component	organelle part	14774
cellular_component	macromolecular complex	10575
cellular_component	membrane-enclosed lumen	3159
cellular_component	cell junction	2022
cellular_component	symplast	2021
cellular_component	extracellular region	1471
cellular_component	supramolecular fiber	613
cellular_component	virion	305
cellular_component	virion part	305
cellular_component	extracellular region part	190
cellular_component	nucleoid	98
cellular_component	extracellular matrix	22
cellular_component	other organism	8
cellular_component	other organism part	8
cellular_component	extracellular matrix component	3
biological_process	metabolic process	62940
biological_process	cellular process	58797
biological_process	single-organism process	43925
biological_process	biological regulation	20667
biological_process	regulation of biological process	18901
biological_process	response to stimulus	18141
biological_process	localization	14656
biological_process	cellular component organization or biogenesis	13827
biological_process	developmental process	9000
biological_process	multicellular organismal process	8346
biological_process	signaling	6508
biological_process	reproduction	5152
biological_process	reproductive process	5138
biological_process	positive regulation of biological process	4567
biological_process	negative regulation of biological process	3809
biological_process	multi-organism process	3460
biological_process	growth	1850
biological_process	immune system process	1674
biological_process	detoxification	415
biological_process	biological adhesion	369
biological_process	rhythmic process	298
biological_process	locomotion	40
biological_process	cell killing	15
