# Supplementary material for: Phenotypic and RNA-seq profiles identified key pathways and genes involved in gleditsioside biosynthesis in Gleditsia sinensis Lam
Source: Research Square preprint supplement (doi:10.21203/rs.3.rs-3021898/v1), 2023-06-16
Supplement: Supplementary file 10 [file e3f62f05af4fdce7f9a5d0e8.docx]

**Supplement Table 10** Amount of variation in gleditsioside contents and length traits in *Gleditsia sinensis* fruits.

| **Traits** | **GS2 - GS1** | **G3vs - GS2** | **GS4 - GS3** | **GS5 - GS4** | **GS6 - GS5** |
| --- | --- | --- | --- | --- | --- |
| Gleditsioside Content changes | 0.1% | 0.8% | 0.4% | -0.9% | 1.2 |
| Pod length changes | 6.11 | 4.13 | 0.35 | 0.1 | 0.03 |
