# Supplementary figures and images for: Phenotypic and RNA-seq profiles identified key pathways and genes involved in gleditsioside biosynthesis in Gleditsia sinensis Lam
Source: Research Square preprint supplement (doi:10.21203/rs.3.rs-3021898/v1), 2023-06-16

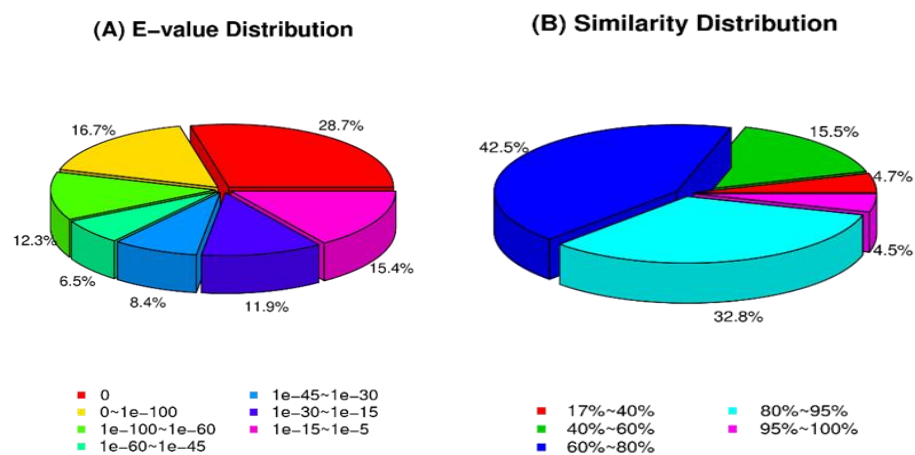

**Supplementary Figure 3:** BLAST outcome of unigenes from Nr database of *Gleditsia sinensis* pods

Supplement: Supplementary file 1 [file 19c7feef0cf7f4aba33244e4.pdf]

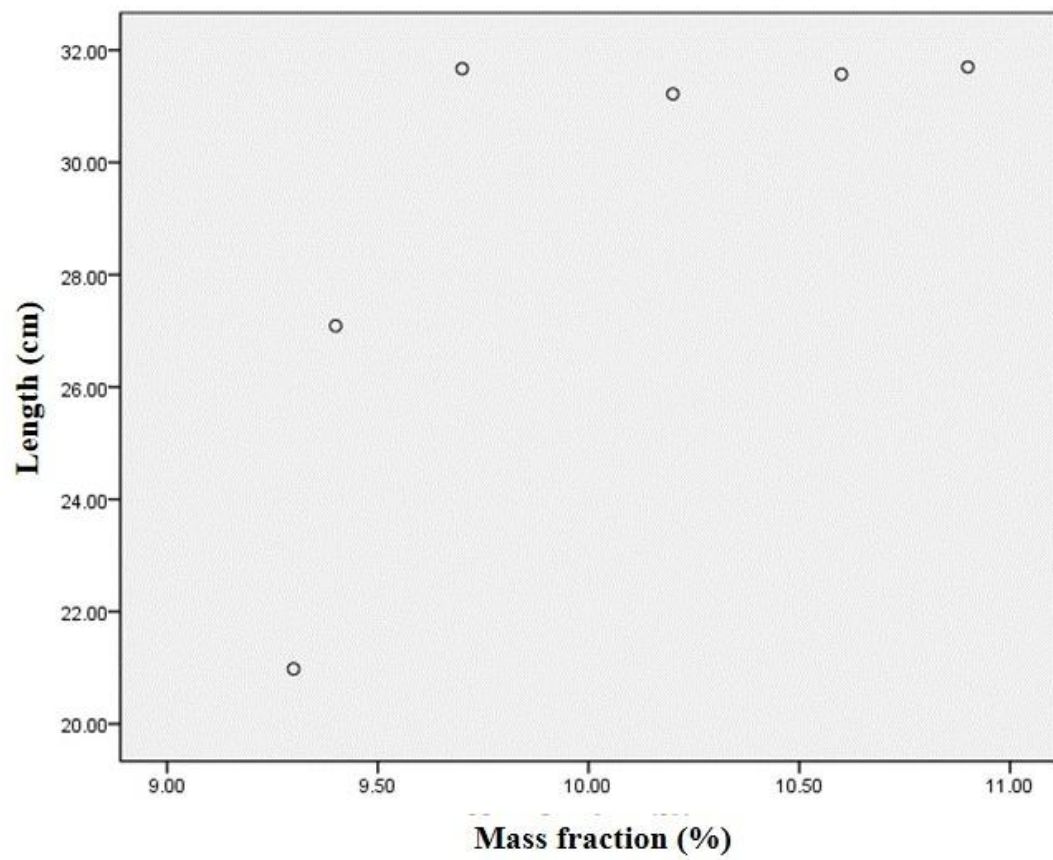

Supplementary Figure 2: Scatter plot GS pods from May to October.

Supplement: Supplementary file 3 [file 6ce03fabcc94a6f7dc5b7514.pdf]

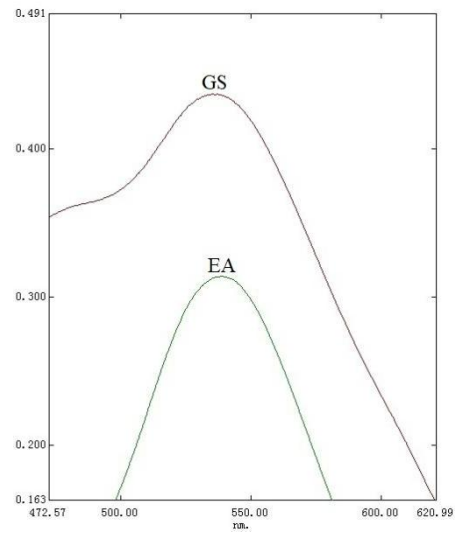

**Supplementary Figure 1:** Full wavelength scanning of EA in *G.sinensis*. GS: *G.sinensis*;  
EA: cystic acid.

Supplement: Supplementary file 5 [file 7e537b45dbe96756019a37de.pdf]
